# Supplementary material
Source: PubMed Central journal article supplement (PMC3769329)

IDENTIFICATION 1

MS/MS Fragmentation of **ADEKPKEGVKTENNNDHNLK**

Found in **P61956**, Small ubiquitin-related modifier 2 OS=Homo sapiens GN=SUMO2 PE=1 SV=3

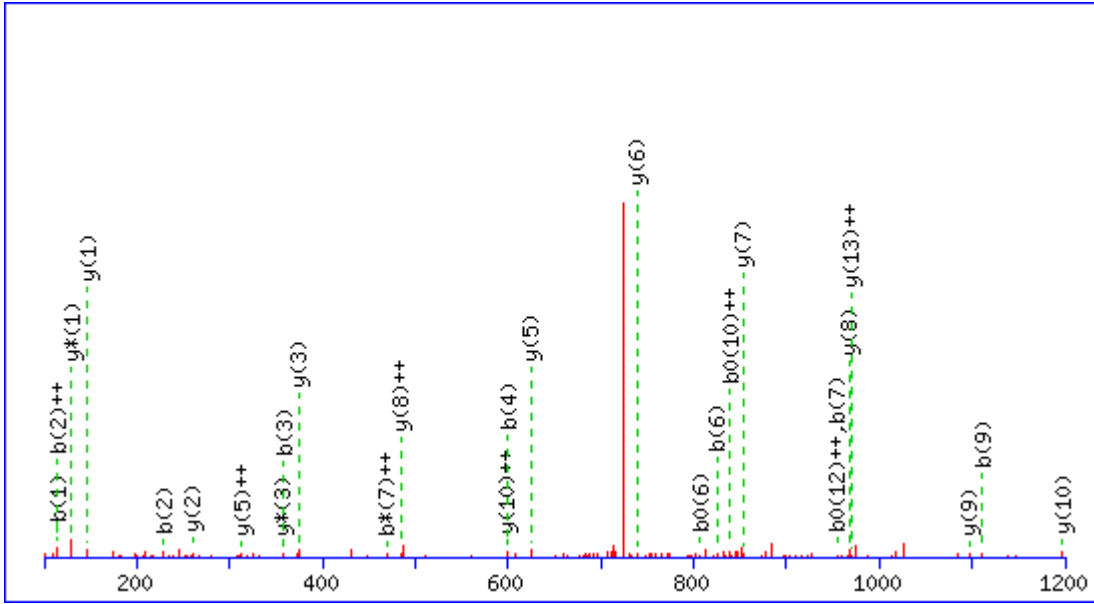

Monoisotopic mass of neutral peptide Mr(calc): 2891.4009

Variable modifications:

N-term : Acetyl (N-term)

K4 : GlyGly (K)

K10 : Sumo 3 (K)

Ions Score: 19 Expect: 43

| #  | b         | b <sup>++</sup> | b <sup>*</sup> | b <sup>+++</sup> | b <sup>0</sup> | b <sup>0++</sup> | Seq. | y         | y <sup>++</sup> | y <sup>*</sup> | y <sup>+++</sup> | y <sup>0</sup> | y <sup>0++</sup> | #  |
|----|-----------|-----------------|----------------|------------------|----------------|------------------|------|-----------|-----------------|----------------|------------------|----------------|------------------|----|
| 1  | 114.0550  | 57.5311         |                |                  |                |                  | A    |           |                 |                |                  |                |                  | 20 |
| 2  | 229.0819  | 115.0446        |                |                  | 211.0713       | 106.0393         | D    | 2779.3605 | 1390.1839       | 2762.3340      | 1381.6706        | 2761.3500      | 1381.1786        | 19 |
| 3  | 358.1245  | 179.5659        |                |                  | 340.1139       | 170.5606         | E    | 2664.3336 | 1332.6704       | 2647.3070      | 1324.1572        | 2646.3230      | 1323.6652        | 18 |
| 4  | 600.2624  | 300.6348        | 583.2358       | 292.1216         | 582.2518       | 291.6295         | K    | 2535.2910 | 1268.1491       | 2518.2645      | 1259.6359        | 2517.2804      | 1259.1439        | 17 |
| 5  | 697.3151  | 349.1612        | 680.2886       | 340.6479         | 679.3046       | 340.1559         | P    | 2293.1531 | 1147.0802       | 2276.1266      | 1138.5669        | 2275.1425      | 1138.0749        | 16 |
| 6  | 825.4101  | 413.2087        | 808.3836       | 404.6954         | 807.3995       | 404.2034         | K    | 2196.1003 | 1098.5538       | 2179.0738      | 1090.0405        | 2178.0898      | 1089.5485        | 15 |
| 7  | 954.4527  | 477.7300        | 937.4262       | 469.2167         | 936.4421       | 468.7247         | E    | 2068.0054 | 1034.5063       | 2050.9788      | 1025.9931        | 2049.9948      | 1025.5010        | 14 |
| 8  | 1011.4742 | 506.2407        | 994.4476       | 497.7274         | 993.4636       | 497.2354         | G    | 1938.9628 | 969.9850        | 1921.9362      | 961.4718         | 1920.9522      | 960.9798         | 13 |
| 9  | 1110.5426 | 555.7749        | 1093.5160      | 547.2617         | 1092.5320      | 546.7696         | V    | 1881.9413 | 941.4743        | 1864.9148      | 932.9610         | 1863.9308      | 932.4690         | 12 |
| 10 | 1695.8297 | 848.4185        | 1678.8031      | 839.9052         | 1677.8191      | 839.4132         | K    | 1782.8729 | 891.9401        | 1765.8464      | 883.4268         | 1764.8623      | 882.9348         | 11 |
| 11 | 1796.8773 | 898.9423        | 1779.8508      | 890.4290         | 1778.8668      | 889.9370         | T    | 1197.5858 | 599.2966        | 1180.5593      | 590.7833         | 1179.5753      | 590.2913         | 10 |
| 12 | 1925.9199 | 963.4636        | 1908.8934      | 954.9503         | 1907.9094      | 954.4583         | E    | 1096.5382 | 548.7727        | 1079.5116      | 540.2594         | 1078.5276      | 539.7674         | 9  |
| 13 | 2039.9629 | 1020.4851       | 2022.9363      | 1011.9718        | 2021.9523      | 1011.4798        | N    | 967.4956  | 484.2514        | 950.4690       | 475.7381         | 949.4850       | 475.2461         | 8  |
| 14 | 2154.0058 | 1077.5065       | 2136.9792      | 1068.9933        | 2135.9952      | 1068.5012        | N    | 853.4526  | 427.2300        | 836.4261       | 418.7167         | 835.4421       | 418.2247         | 7  |
| 15 | 2269.0327 | 1135.0200       | 2252.0062      | 1126.5067        | 2251.0222      | 1126.0147        | D    | 739.4097  | 370.2085        | 722.3832       | 361.6952         | 721.3991       | 361.2032         | 6  |
| 16 | 2406.0916 | 1203.5495       | 2389.0651      | 1195.0362        | 2388.0811      | 1194.5442        | H    | 624.3828  | 312.6950        | 607.3562       | 304.1817         |                |                  | 5  |
| 17 | 2519.1757 | 1260.0915       | 2502.1491      | 1251.5782        | 2501.1651      | 1251.0862        | I    | 487.3239  | 244.1656        | 470.2973       | 235.6523         |                |                  | 4  |
| 18 | 2633.2186 | 1317.1130       | 2616.1921      | 1308.5997        | 2615.2081      | 1308.1077        | N    | 374.2398  | 187.6235        | 357.2132       | 179.1103         |                |                  | 3  |
| 19 | 2746.3027 | 1373.6550       | 2729.2761      | 1365.1417        | 2728.2921      | 1364.6497        | L    | 260.1969  | 130.6021        | 243.1703       | 122.0888         |                |                  | 2  |
| 20 |           |                 |                |                  |                |                  | K    | 147.1128  | 74.0600         | 130.0863       | 65.5468          |                |                  | 1  |

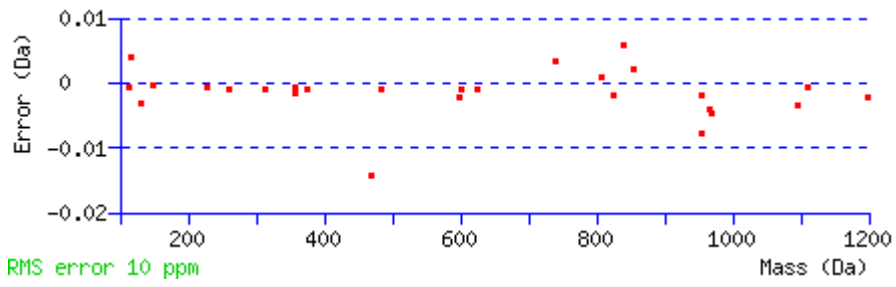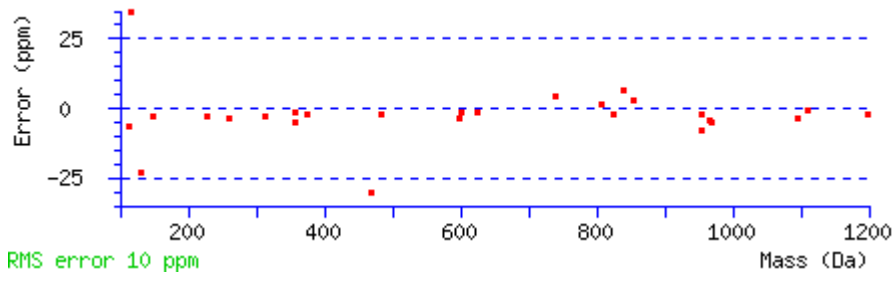

IDENTIFICATION 2

MS/MS Fragmentation of **ADEKPKEGVKTENNDHINLK**

Found in **P61956**, Small ubiquitin-related modifier 2 OS=Homo sapiens GN=SUMO2 PE=1 SV=3

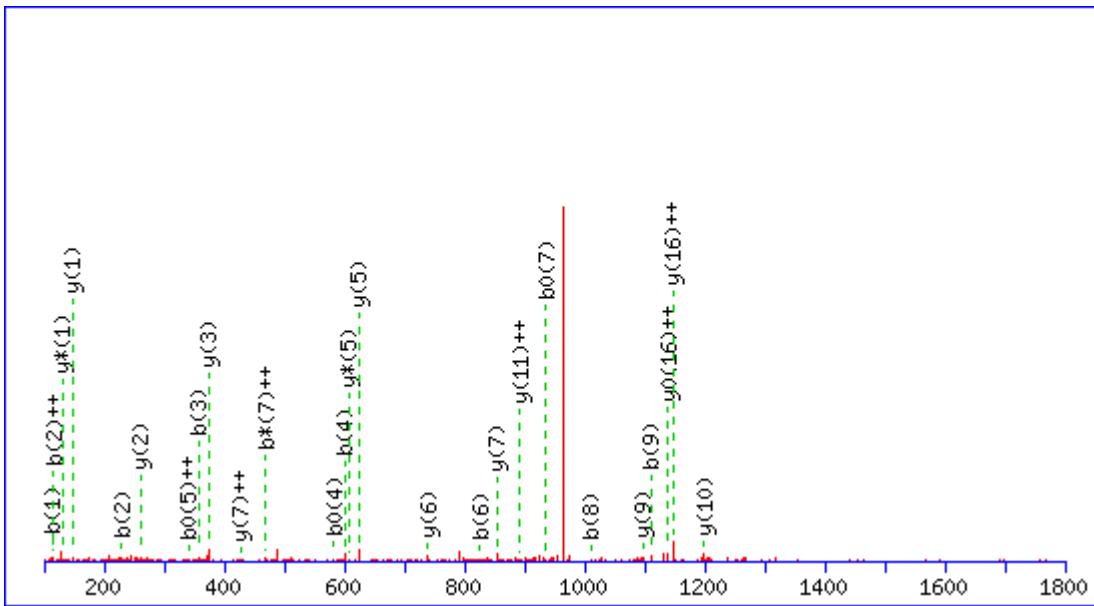

Monoisotopic mass of neutral peptide Mr(calc): 2892.3849

Variable modifications:

N-term : Acetyl (N-term)

K4 : GlyGly (K)

K10 : Sumo 3 (K)

N13 : Deamidated (NQ)

Ions Score: 7 Expect: 6.9e+02

| #  | b         | b <sup>++</sup> | b <sup>*</sup> | b <sup>+++</sup> | b <sup>0</sup> | b <sup>0++</sup> | Seq. | y         | y <sup>++</sup> | y <sup>*</sup> | y <sup>+++</sup> | y <sup>0</sup> | y <sup>0++</sup> | #  |
|----|-----------|-----------------|----------------|------------------|----------------|------------------|------|-----------|-----------------|----------------|------------------|----------------|------------------|----|
| 1  | 114.0550  | 57.5311         |                |                  |                |                  | A    |           |                 |                |                  |                |                  | 20 |
| 2  | 229.0819  | 115.0446        |                |                  | 211.0713       | 106.0393         | D    | 2780.3446 | 1390.6759       | 2763.3180      | 1382.1626        | 2762.3340      | 1381.6706        | 19 |
| 3  | 358.1245  | 179.5659        |                |                  | 340.1139       | 170.5606         | E    | 2665.3176 | 1333.1624       | 2648.2911      | 1324.6492        | 2647.3070      | 1324.1572        | 18 |
| 4  | 600.2624  | 300.6348        | 583.2358       | 292.1216         | 582.2518       | 291.6295         | K    | 2536.2750 | 1268.6411       | 2519.2485      | 1260.1279        | 2518.2645      | 1259.6359        | 17 |
| 5  | 697.3151  | 349.1612        | 680.2886       | 340.6479         | 679.3046       | 340.1559         | P    | 2294.1371 | 1147.5722       | 2277.1106      | 1139.0589        | 2276.1266      | 1138.5669        | 16 |
| 6  | 825.4101  | 413.2087        | 808.3836       | 404.6954         | 807.3995       | 404.2034         | K    | 2197.0844 | 1099.0458       | 2180.0578      | 1090.5325        | 2179.0738      | 1090.0405        | 15 |
| 7  | 954.4527  | 477.7300        | 937.4262       | 469.2167         | 936.4421       | 468.7247         | E    | 2068.9894 | 1034.9983       | 2051.9629      | 1026.4851        | 2050.9788      | 1025.9931        | 14 |
| 8  | 1011.4742 | 506.2407        | 994.4476       | 497.7274         | 993.4636       | 497.2354         | G    | 1939.9468 | 970.4770        | 1922.9203      | 961.9638         | 1921.9362      | 961.4718         | 13 |
| 9  | 1110.5426 | 555.7749        | 1093.5160      | 547.2617         | 1092.5320      | 546.7696         | V    | 1882.9253 | 941.9663        | 1865.8988      | 933.4530         | 1864.9148      | 932.9610         | 12 |
| 10 | 1695.8297 | 848.4185        | 1678.8031      | 839.9052         | 1677.8191      | 839.4132         | K    | 1783.8569 | 892.4321        | 1766.8304      | 883.9188         | 1765.8464      | 883.4268         | 11 |
| 11 | 1796.8773 | 898.9423        | 1779.8508      | 890.4290         | 1778.8668      | 889.9370         | T    | 1198.5699 | 599.7886        | 1181.5433      | 591.2753         | 1180.5593      | 590.7833         | 10 |
| 12 | 1925.9199 | 963.4636        | 1908.8934      | 954.9503         | 1907.9094      | 954.4583         | E    | 1097.5222 | 549.2647        | 1080.4956      | 540.7515         | 1079.5116      | 540.2594         | 9  |
| 13 | 2040.9469 | 1020.9771       | 2023.9203      | 1012.4638        | 2022.9363      | 1011.9718        | N    | 968.4796  | 484.7434        | 951.4530       | 476.2302         | 950.4690       | 475.7381         | 8  |
| 14 | 2154.9898 | 1077.9985       | 2137.9632      | 1069.4853        | 2136.9792      | 1068.9933        | N    | 853.4526  | 427.2300        | 836.4261       | 418.7167         | 835.4421       | 418.2247         | 7  |
| 15 | 2270.0167 | 1135.5120       | 2252.9902      | 1126.9987        | 2252.0062      | 1126.5067        | D    | 739.4097  | 370.2085        | 722.3832       | 361.6952         | 721.3991       | 361.2032         | 6  |
| 16 | 2407.0757 | 1204.0415       | 2390.0491      | 1195.5282        | 2389.0651      | 1195.0362        | H    | 624.3828  | 312.6950        | 607.3562       | 304.1817         |                |                  | 5  |
| 17 | 2520.1597 | 1260.5835       | 2503.1332      | 1252.0702        | 2502.1491      | 1251.5782        | I    | 487.3239  | 244.1656        | 470.2973       | 235.6523         |                |                  | 4  |
| 18 | 2634.2026 | 1317.6050       | 2617.1761      | 1309.0917        | 2616.1921      | 1308.5997        | N    | 374.2398  | 187.6235        | 357.2132       | 179.1103         |                |                  | 3  |
| 19 | 2747.2867 | 1374.1470       | 2730.2602      | 1365.6337        | 2729.2761      | 1365.1417        | L    | 260.1969  | 130.6021        | 243.1703       | 122.0888         |                |                  | 2  |
| 20 |           |                 |                |                  |                |                  | K    | 147.1128  | 74.0600         | 130.0863       | 65.5468          |                |                  | 1  |

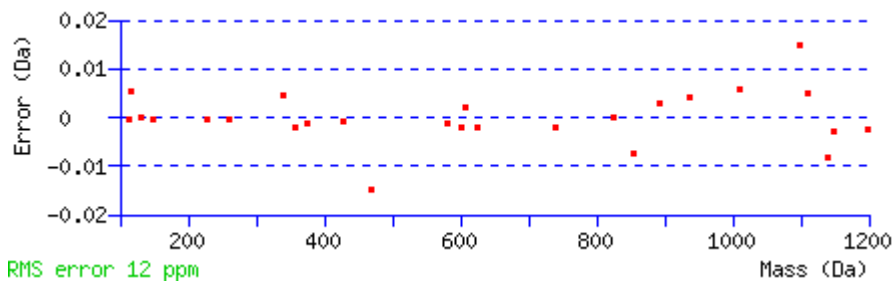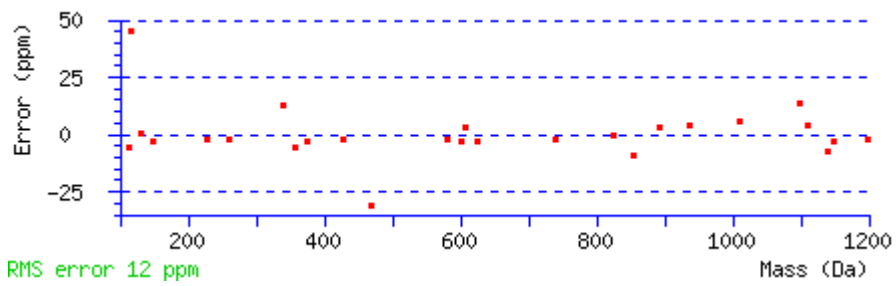

IDENTIFICATION 3

MS/MS Fragmentation of **ADEKPKEGVKTENNDHINLK**

Found in **P61956**, Small ubiquitin-related modifier 2 OS=Homo sapiens GN=SUMO2 PE=1 SV=3

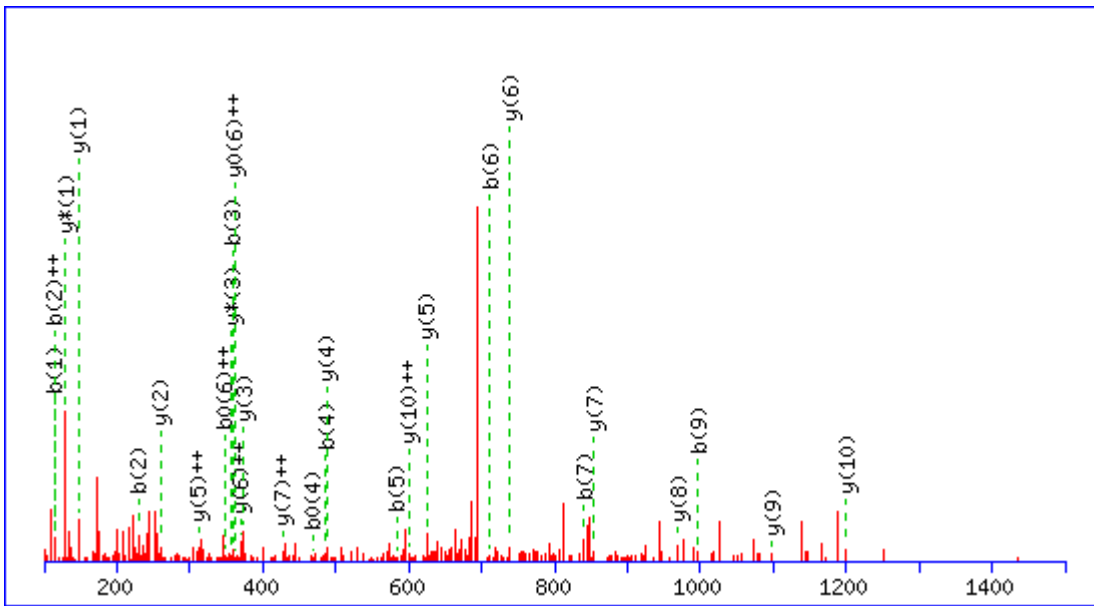

Monoisotopic mass of neutral peptide  $M_r(\text{calc})$ : 2779.3260

Variable modifications:

N-term : Acetyl (N-term)

K10 : Sumo 3 (K)

N13 : Deamidated (NQ)

N14 : Deamidated (NQ)

Ions Score: 3 Expect: 2.2e+03

| #  | b         | b <sup>++</sup> | b <sup>*</sup> | b <sup>+++</sup> | b <sup>0</sup> | b <sup>0++</sup> | Seq. | y         | y <sup>++</sup> | y <sup>*</sup> | y <sup>+++</sup> | y <sup>0</sup> | y <sup>0++</sup> | #  |
|----|-----------|-----------------|----------------|------------------|----------------|------------------|------|-----------|-----------------|----------------|------------------|----------------|------------------|----|
| 1  | 114.0550  | 57.5311         |                |                  |                |                  | A    |           |                 |                |                  |                |                  | 20 |
| 2  | 229.0819  | 115.0446        |                |                  | 211.0713       | 106.0393         | D    | 2667.2856 | 1334.1465       | 2650.2591      | 1325.6332        | 2649.2751      | 1325.1412        | 19 |
| 3  | 358.1245  | 179.5659        |                |                  | 340.1139       | 170.5606         | E    | 2552.2587 | 1276.6330       | 2535.2322      | 1268.1197        | 2534.2481      | 1267.6277        | 18 |
| 4  | 486.2195  | 243.6134        | 469.1929       | 235.1001         | 468.2089       | 234.6081         | K    | 2423.2161 | 1212.1117       | 2406.1896      | 1203.5984        | 2405.2055      | 1203.1064        | 17 |
| 5  | 583.2722  | 292.1397        | 566.2457       | 283.6265         | 565.2617       | 283.1345         | P    | 2295.1211 | 1148.0642       | 2278.0946      | 1139.5509        | 2277.1106      | 1139.0589        | 16 |
| 6  | 711.3672  | 356.1872        | 694.3406       | 347.6740         | 693.3566       | 347.1819         | K    | 2198.0684 | 1099.5378       | 2181.0418      | 1091.0246        | 2180.0578      | 1090.5325        | 15 |
| 7  | 840.4098  | 420.7085        | 823.3832       | 412.1953         | 822.3992       | 411.7032         | E    | 2069.9734 | 1035.4903       | 2052.9469      | 1026.9771        | 2051.9629      | 1026.4851        | 14 |
| 8  | 897.4312  | 449.2193        | 880.4047       | 440.7060         | 879.4207       | 440.2140         | G    | 1940.9308 | 970.9691        | 1923.9043      | 962.4558         | 1922.9203      | 961.9638         | 13 |
| 9  | 996.4997  | 498.7535        | 979.4731       | 490.2402         | 978.4891       | 489.7482         | V    | 1883.9094 | 942.4583        | 1866.8828      | 933.9450         | 1865.8988      | 933.4530         | 12 |
| 10 | 1581.7867 | 791.3970        | 1564.7602      | 782.8837         | 1563.7762      | 782.3917         | K    | 1784.8409 | 892.9241        | 1767.8144      | 884.4108         | 1766.8304      | 883.9188         | 11 |
| 11 | 1682.8344 | 841.9208        | 1665.8079      | 833.4076         | 1664.8238      | 832.9156         | T    | 1199.5539 | 600.2806        | 1182.5273      | 591.7673         | 1181.5433      | 591.2753         | 10 |
| 12 | 1811.8770 | 906.4421        | 1794.8504      | 897.9289         | 1793.8664      | 897.4369         | E    | 1098.5062 | 549.7567        | 1081.4796      | 541.2435         | 1080.4956      | 540.7515         | 9  |
| 13 | 1926.9039 | 963.9556        | 1909.8774      | 955.4423         | 1908.8934      | 954.9503         | N    | 969.4636  | 485.2354        | 952.4371       | 476.7222         | 951.4530       | 476.2302         | 8  |
| 14 | 2041.9309 | 1021.4691       | 2024.9043      | 1012.9558        | 2023.9203      | 1012.4638        | N    | 854.4367  | 427.7220        | 837.4101       | 419.2087         | 836.4261       | 418.7167         | 7  |
| 15 | 2156.9578 | 1078.9826       | 2139.9313      | 1070.4693        | 2138.9473      | 1069.9773        | D    | 739.4097  | 370.2085        | 722.3832       | 361.6952         | 721.3991       | 361.2032         | 6  |
| 16 | 2294.0167 | 1147.5120       | 2276.9902      | 1138.9987        | 2276.0062      | 1138.5067        | H    | 624.3828  | 312.6950        | 607.3562       | 304.1817         |                |                  | 5  |
| 17 | 2407.1008 | 1204.0540       | 2390.0743      | 1195.5408        | 2389.0902      | 1195.0488        | I    | 487.3239  | 244.1656        | 470.2973       | 235.6523         |                |                  | 4  |
| 18 | 2521.1437 | 1261.0755       | 2504.1172      | 1252.5622        | 2503.1332      | 1252.0702        | N    | 374.2398  | 187.6235        | 357.2132       | 179.1103         |                |                  | 3  |
| 19 | 2634.2278 | 1317.6175       | 2617.2012      | 1309.1043        | 2616.2172      | 1308.6123        | L    | 260.1969  | 130.6021        | 243.1703       | 122.0888         |                |                  | 2  |
| 20 |           |                 |                |                  |                |                  | K    | 147.1128  | 74.0600         | 130.0863       | 65.5468          |                |                  | 1  |

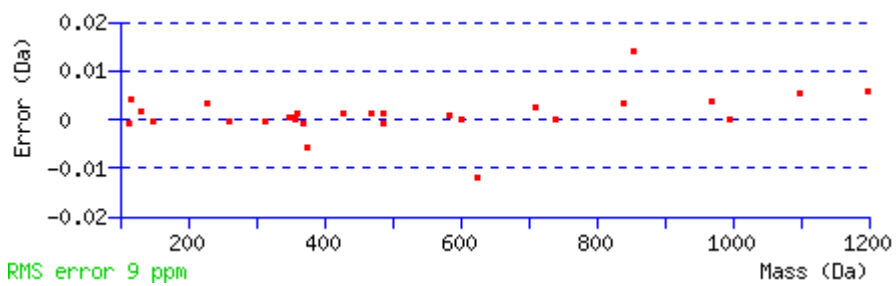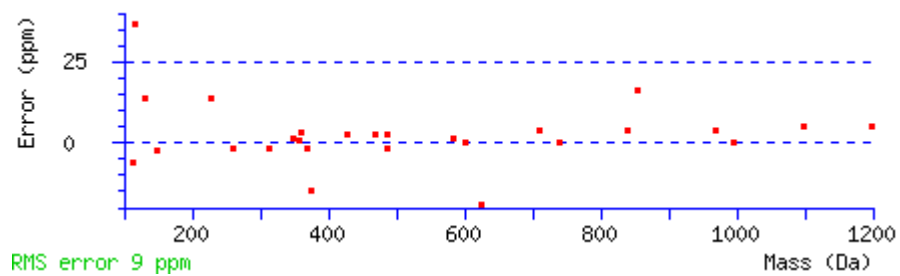

IDENTIFICATION 4

MS/MS Fragmentation of **ADEKPKEGVKTENNDHNLK**

Found in **P61956**, Small ubiquitin-related modifier 2 OS=Homo sapiens GN=SUMO2 PE=1 SV=3

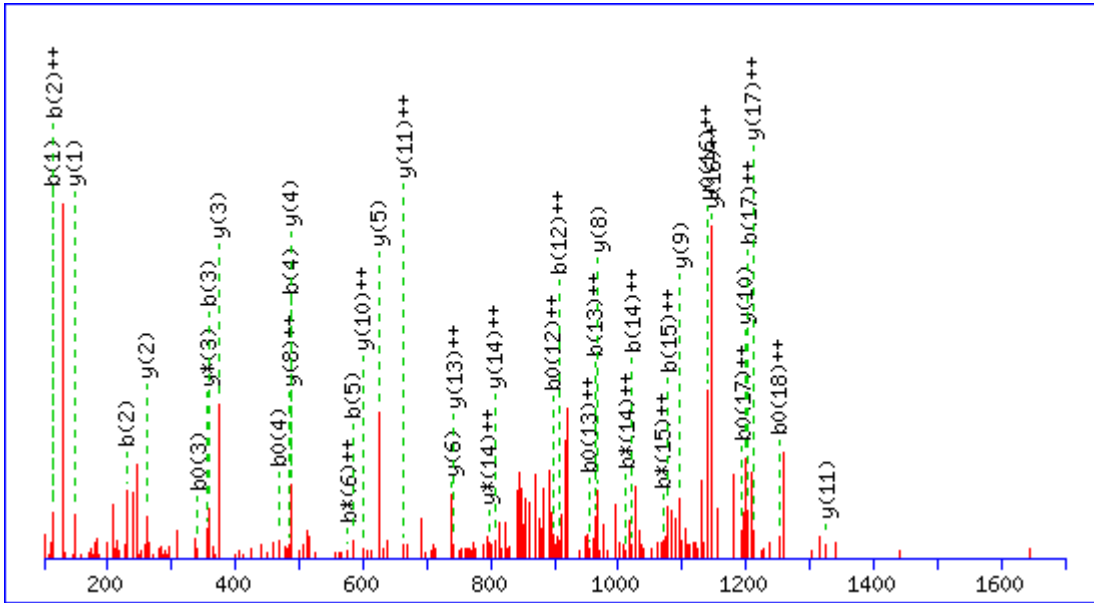

Monoisotopic mass of neutral peptide  $M_r(\text{calc})$ : 2778.3420

Variable modifications:

N-term : Acetyl (N-term)

K6 : Sumo 3 (K)

N14 : Deamidated (NQ)

Ions Score: 32 Expect: 2.5

| #  | b         | b <sup>++</sup> | b <sup>*</sup> | b <sup>+++</sup> | b <sup>0</sup> | b <sup>0++</sup> | Seq. | y         | y <sup>++</sup> | y <sup>*</sup> | y <sup>+++</sup> | y <sup>0</sup> | y <sup>0++</sup> | #  |
|----|-----------|-----------------|----------------|------------------|----------------|------------------|------|-----------|-----------------|----------------|------------------|----------------|------------------|----|
| 1  | 114.0550  | 57.5311         |                |                  |                |                  | A    |           |                 |                |                  |                |                  | 20 |
| 2  | 229.0819  | 115.0446        |                |                  | 211.0713       | 106.0393         | D    | 2666.3016 | 1333.6545       | 2649.2751      | 1325.1412        | 2648.2911      | 1324.6492        | 19 |
| 3  | 358.1245  | 179.5659        |                |                  | 340.1139       | 170.5606         | E    | 2551.2747 | 1276.1410       | 2534.2481      | 1267.6277        | 2533.2641      | 1267.1357        | 18 |
| 4  | 486.2195  | 243.6134        | 469.1929       | 235.1001         | 468.2089       | 234.6081         | K    | 2422.2321 | 1211.6197       | 2405.2055      | 1203.1064        | 2404.2215      | 1202.6144        | 17 |
| 5  | 583.2722  | 292.1397        | 566.2457       | 283.6265         | 565.2617       | 283.1345         | P    | 2294.1371 | 1147.5722       | 2277.1106      | 1139.0589        | 2276.1266      | 1138.5669        | 16 |
| 6  | 1168.5593 | 584.7833        | 1151.5327      | 576.2700         | 1150.5487      | 575.7780         | K    | 2197.0844 | 1099.0458       | 2180.0578      | 1090.5325        | 2179.0738      | 1090.0405        | 15 |
| 7  | 1297.6019 | 649.3046        | 1280.5753      | 640.7913         | 1279.5913      | 640.2993         | E    | 1611.7973 | 806.4023        | 1594.7707      | 797.8890         | 1593.7867      | 797.3970         | 14 |
| 8  | 1354.6233 | 677.8153        | 1337.5968      | 669.3020         | 1336.6128      | 668.8100         | G    | 1482.7547 | 741.8810        | 1465.7281      | 733.3677         | 1464.7441      | 732.8757         | 13 |
| 9  | 1453.6918 | 727.3495        | 1436.6652      | 718.8362         | 1435.6812      | 718.3442         | V    | 1425.7332 | 713.3703        | 1408.7067      | 704.8570         | 1407.7227      | 704.3650         | 12 |
| 10 | 1581.7867 | 791.3970        | 1564.7602      | 782.8837         | 1563.7762      | 782.3917         | K    | 1326.6648 | 663.8360        | 1309.6383      | 655.3228         | 1308.6543      | 654.8308         | 11 |
| 11 | 1682.8344 | 841.9208        | 1665.8079      | 833.4076         | 1664.8238      | 832.9156         | T    | 1198.5699 | 599.7886        | 1181.5433      | 591.2753         | 1180.5593      | 590.7833         | 10 |
| 12 | 1811.8770 | 906.4421        | 1794.8504      | 897.9289         | 1793.8664      | 897.4369         | E    | 1097.5222 | 549.2647        | 1080.4956      | 540.7515         | 1079.5116      | 540.2594         | 9  |
| 13 | 1925.9199 | 963.4636        | 1908.8934      | 954.9503         | 1907.9094      | 954.4583         | N    | 968.4796  | 484.7434        | 951.4530       | 476.2302         | 950.4690       | 475.7381         | 8  |
| 14 | 2040.9469 | 1020.9771       | 2023.9203      | 1012.4638        | 2022.9363      | 1011.9718        | N    | 854.4367  | 427.7220        | 837.4101       | 419.2087         | 836.4261       | 418.7167         | 7  |
| 15 | 2155.9738 | 1078.4905       | 2138.9473      | 1069.9773        | 2137.9632      | 1069.4853        | D    | 739.4097  | 370.2085        | 722.3832       | 361.6952         | 721.3991       | 361.2032         | 6  |
| 16 | 2293.0327 | 1147.0200       | 2276.0062      | 1138.5067        | 2275.0222      | 1138.0147        | H    | 624.3828  | 312.6950        | 607.3562       | 304.1817         |                |                  | 5  |
| 17 | 2406.1168 | 1203.5620       | 2389.0902      | 1195.0488        | 2388.1062      | 1194.5567        | I    | 487.3239  | 244.1656        | 470.2973       | 235.6523         |                |                  | 4  |
| 18 | 2520.1597 | 1260.5835       | 2503.1332      | 1252.0702        | 2502.1491      | 1251.5782        | N    | 374.2398  | 187.6235        | 357.2132       | 179.1103         |                |                  | 3  |
| 19 | 2633.2438 | 1317.1255       | 2616.2172      | 1308.6123        | 2615.2332      | 1308.1202        | L    | 260.1969  | 130.6021        | 243.1703       | 122.0888         |                |                  | 2  |
| 20 |           |                 |                |                  |                |                  | K    | 147.1128  | 74.0600         | 130.0863       | 65.5468          |                |                  | 1  |

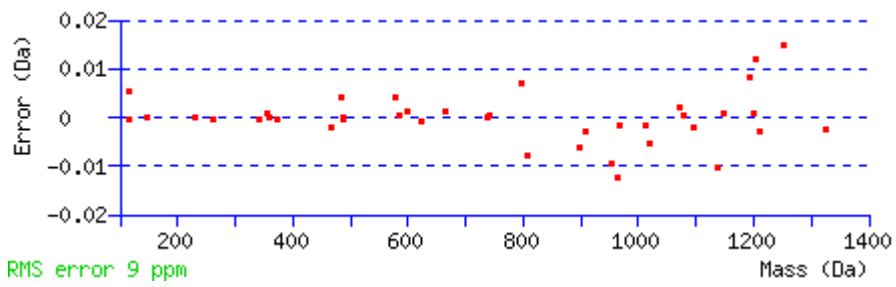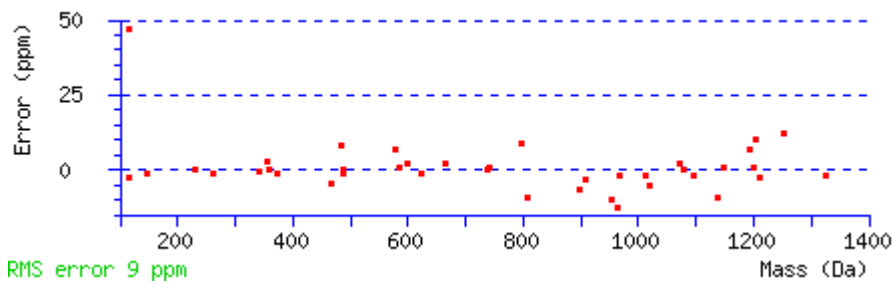



IDENTIFICATION 5

MS/MS Fragmentation of **ADSL LAVVKREPAEQPGDGER**

Found in **Q15424**, Scaffold attachment factor B1 OS=Homo sapiens GN=SAFB PE=1 SV=4

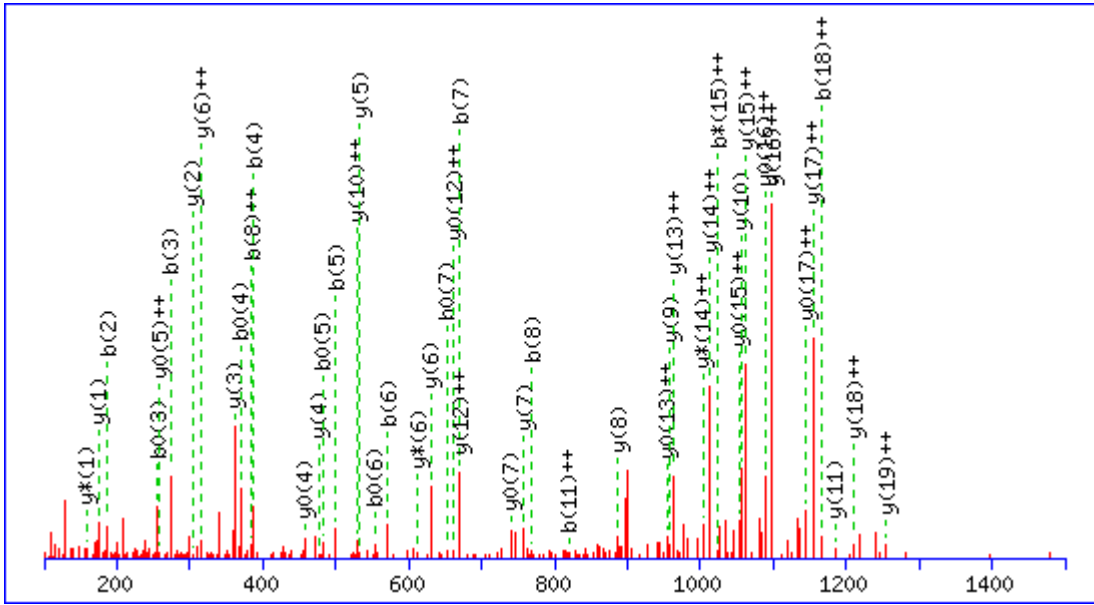

Monoisotopic mass of neutral peptide  $M_r(\text{calc})$ : 2693.3369

Variable modifications:

K9 : Sumo 3 (K)

Ions Score: 52 Expect: 0.014

| #  | b         | b <sup>++</sup> | b <sup>*</sup> | b <sup>+++</sup> | b <sup>0</sup> | b <sup>0++</sup> | Seq. | y         | y <sup>++</sup> | y <sup>*</sup> | y <sup>+++</sup> | y <sup>0</sup> | y <sup>0++</sup> | #  |
|----|-----------|-----------------|----------------|------------------|----------------|------------------|------|-----------|-----------------|----------------|------------------|----------------|------------------|----|
| 1  | 72.0444   | 36.5258         |                |                  |                |                  | A    |           |                 |                |                  |                |                  | 21 |
| 2  | 187.0713  | 94.0393         |                |                  | 169.0608       | 85.0340          | D    | 2623.3070 | 1312.1572       | 2606.2805      | 1303.6439        | 2605.2965      | 1303.1519        | 20 |
| 3  | 274.1034  | 137.5553        |                |                  | 256.0928       | 128.5500         | S    | 2508.2801 | 1254.6437       | 2491.2536      | 1246.1304        | 2490.2695      | 1245.6384        | 19 |
| 4  | 387.1874  | 194.0974        |                |                  | 369.1769       | 185.0921         | L    | 2421.2481 | 1211.1277       | 2404.2215      | 1202.6144        | 2403.2375      | 1202.1224        | 18 |
| 5  | 500.2715  | 250.6394        |                |                  | 482.2609       | 241.6341         | L    | 2308.1640 | 1154.5856       | 2291.1375      | 1146.0724        | 2290.1534      | 1145.5804        | 17 |
| 6  | 571.3086  | 286.1579        |                |                  | 553.2980       | 277.1527         | A    | 2195.0799 | 1098.0436       | 2178.0534      | 1089.5303        | 2177.0694      | 1089.0383        | 16 |
| 7  | 670.3770  | 335.6921        |                |                  | 652.3665       | 326.6869         | V    | 2124.0428 | 1062.5251       | 2107.0163      | 1054.0118        | 2106.0323      | 1053.5198        | 15 |
| 8  | 769.4454  | 385.2264        |                |                  | 751.4349       | 376.2211         | V    | 2024.9744 | 1012.9908       | 2007.9479      | 1004.4776        | 2006.9639      | 1003.9856        | 14 |
| 9  | 1354.7325 | 677.8699        | 1337.7060      | 669.3566         | 1336.7219      | 668.8646         | K    | 1925.9060 | 963.4566        | 1908.8795      | 954.9434         | 1907.8954      | 954.4514         | 13 |
| 10 | 1510.8336 | 755.9204        | 1493.8071      | 747.4072         | 1492.8231      | 746.9152         | R    | 1340.6189 | 670.8131        | 1323.5924      | 662.2998         | 1322.6084      | 661.8078         | 12 |
| 11 | 1639.8762 | 820.4417        | 1622.8497      | 811.9285         | 1621.8656      | 811.4365         | E    | 1184.5178 | 592.7625        | 1167.4913      | 584.2493         | 1166.5073      | 583.7573         | 11 |
| 12 | 1736.9290 | 868.9681        | 1719.9024      | 860.4548         | 1718.9184      | 859.9628         | P    | 1055.4752 | 528.2413        | 1038.4487      | 519.7280         | 1037.4647      | 519.2360         | 10 |
| 13 | 1807.9661 | 904.4867        | 1790.9395      | 895.9734         | 1789.9555      | 895.4814         | A    | 958.4225  | 479.7149        | 941.3959       | 471.2016         | 940.4119       | 470.7096         | 9  |
| 14 | 1937.0087 | 969.0080        | 1919.9821      | 960.4947         | 1918.9981      | 960.0027         | E    | 887.3854  | 444.1963        | 870.3588       | 435.6830         | 869.3748       | 435.1910         | 8  |
| 15 | 2065.0673 | 1033.0373       | 2048.0407      | 1024.5240        | 2047.0567      | 1024.0320        | Q    | 758.3428  | 379.6750        | 741.3162       | 371.1617         | 740.3322       | 370.6697         | 7  |
| 16 | 2162.1200 | 1081.5636       | 2145.0935      | 1073.0504        | 2144.1095      | 1072.5584        | P    | 630.2842  | 315.6457        | 613.2576       | 307.1325         | 612.2736       | 306.6404         | 6  |
| 17 | 2219.1415 | 1110.0744       | 2202.1149      | 1101.5611        | 2201.1309      | 1101.0691        | G    | 533.2314  | 267.1193        | 516.2049       | 258.6061         | 515.2209       | 258.1141         | 5  |
| 18 | 2334.1684 | 1167.5879       | 2317.1419      | 1159.0746        | 2316.1579      | 1158.5826        | D    | 476.2100  | 238.6086        | 459.1834       | 230.0953         | 458.1994       | 229.6033         | 4  |
| 19 | 2391.1899 | 1196.0986       | 2374.1633      | 1187.5853        | 2373.1793      | 1187.0933        | G    | 361.1830  | 181.0951        | 344.1565       | 172.5819         | 343.1724       | 172.0899         | 3  |
| 20 | 2520.2325 | 1260.6199       | 2503.2059      | 1252.1066        | 2502.2219      | 1251.6146        | E    | 304.1615  | 152.5844        | 287.1350       | 144.0711         | 286.1510       | 143.5791         | 2  |
| 21 |           |                 |                |                  |                |                  | R    | 175.1190  | 88.0631         | 158.0924       | 79.5498          |                |                  | 1  |

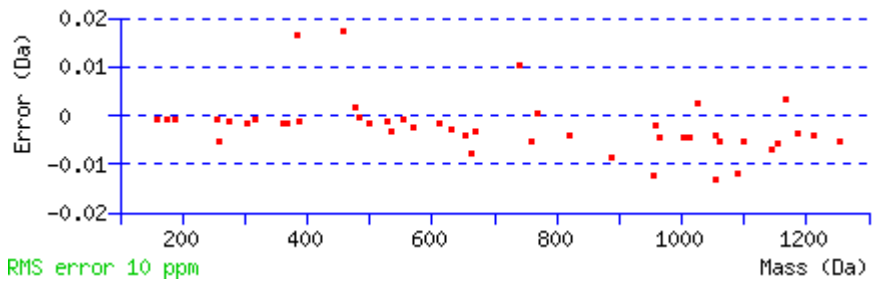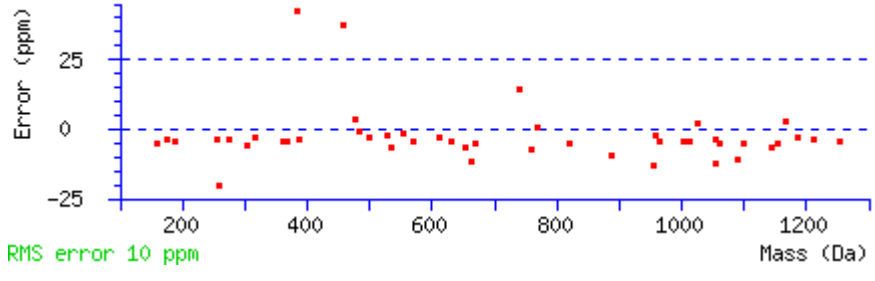

IDENTIFICATION 6

MS/MS Fragmentation of **ATGDETGAKVERADGYEPPVQESV**

Found in **P61247**, 40S ribosomal protein S3a OS=Homo sapiens GN=RPS3A PE=1 SV=2

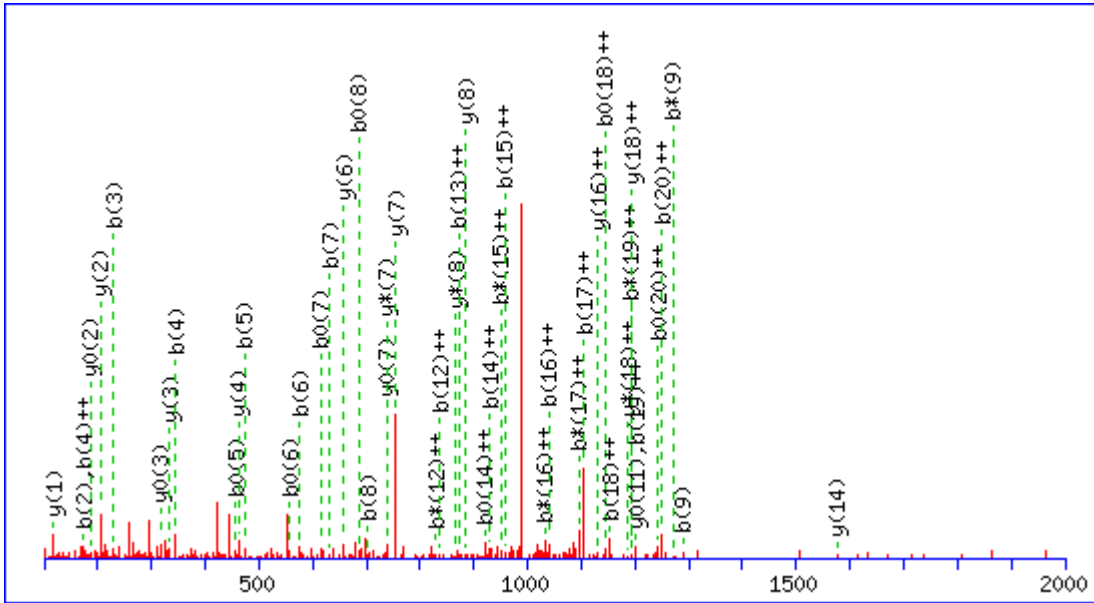

Monoisotopic mass of neutral peptide  $M_r(\text{calc})$ : 2961.3588

Variable modifications:

K9 : Sumo 3 (K)

Ions Score: 20 Expect: 64

| #  | b         | b <sup>++</sup> | b <sup>*</sup> | b <sup>+++</sup> | b <sup>0</sup> | b <sup>0++</sup> | Seq. | y         | y <sup>++</sup> | y <sup>*</sup> | y <sup>+++</sup> | y <sup>0</sup> | y <sup>0++</sup> | #  |
|----|-----------|-----------------|----------------|------------------|----------------|------------------|------|-----------|-----------------|----------------|------------------|----------------|------------------|----|
| 1  | 72.0444   | 36.5258         |                |                  |                |                  | A    |           |                 |                |                  |                |                  | 24 |
| 2  | 173.0921  | 87.0497         |                |                  | 155.0815       | 78.0444          | T    | 2891.3290 | 1446.1681       | 2874.3024      | 1437.6548        | 2873.3184      | 1437.1628        | 23 |
| 3  | 230.1135  | 115.5604        |                |                  | 212.1030       | 106.5551         | G    | 2790.2813 | 1395.6443       | 2773.2547      | 1387.1310        | 2772.2707      | 1386.6390        | 22 |
| 4  | 345.1405  | 173.0739        |                |                  | 327.1299       | 164.0686         | D    | 2733.2598 | 1367.1335       | 2716.2333      | 1358.6203        | 2715.2493      | 1358.1283        | 21 |
| 5  | 474.1831  | 237.5952        |                |                  | 456.1725       | 228.5899         | E    | 2618.2329 | 1309.6201       | 2601.2063      | 1301.1068        | 2600.2223      | 1300.6148        | 20 |
| 6  | 575.2307  | 288.1190        |                |                  | 557.2202       | 279.1137         | T    | 2489.1903 | 1245.0988       | 2472.1637      | 1236.5855        | 2471.1797      | 1236.0935        | 19 |
| 7  | 632.2522  | 316.6297        |                |                  | 614.2416       | 307.6245         | G    | 2388.1426 | 1194.5749       | 2371.1161      | 1186.0617        | 2370.1320      | 1185.5697        | 18 |
| 8  | 703.2893  | 352.1483        |                |                  | 685.2788       | 343.1430         | A    | 2331.1211 | 1166.0642       | 2314.0946      | 1157.5509        | 2313.1106      | 1157.0589        | 17 |
| 9  | 1288.5764 | 644.7918        | 1271.5499      | 636.2786         | 1270.5658      | 635.7866         | K    | 2260.0840 | 1130.5457       | 2243.0575      | 1122.0324        | 2242.0735      | 1121.5404        | 16 |
| 10 | 1387.6448 | 694.3260        | 1370.6183      | 685.8128         | 1369.6342      | 685.3208         | V    | 1674.7970 | 837.9021        | 1657.7704      | 829.3888         | 1656.7864      | 828.8968         | 15 |
| 11 | 1516.6874 | 758.8473        | 1499.6609      | 750.3341         | 1498.6768      | 749.8421         | E    | 1575.7285 | 788.3679        | 1558.7020      | 779.8546         | 1557.7180      | 779.3626         | 14 |
| 12 | 1672.7885 | 836.8979        | 1655.7620      | 828.3846         | 1654.7780      | 827.8926         | R    | 1446.6860 | 723.8466        | 1429.6594      | 715.3333         | 1428.6754      | 714.8413         | 13 |
| 13 | 1743.8256 | 872.4165        | 1726.7991      | 863.9032         | 1725.8151      | 863.4112         | A    | 1290.5848 | 645.7961        | 1273.5583      | 637.2828         | 1272.5743      | 636.7908         | 12 |
| 14 | 1858.8526 | 929.9299        | 1841.8260      | 921.4167         | 1840.8420      | 920.9246         | D    | 1219.5477 | 610.2775        | 1202.5212      | 601.7642         | 1201.5372      | 601.2722         | 11 |
| 15 | 1915.8740 | 958.4407        | 1898.8475      | 949.9274         | 1897.8635      | 949.4354         | G    | 1104.5208 | 552.7640        | 1087.4942      | 544.2508         | 1086.5102      | 543.7587         | 10 |
| 16 | 2078.9374 | 1039.9723       | 2061.9108      | 1031.4590        | 2060.9268      | 1030.9670        | Y    | 1047.4993 | 524.2533        | 1030.4728      | 515.7400         | 1029.4888      | 515.2480         | 9  |
| 17 | 2207.9800 | 1104.4936       | 2190.9534      | 1095.9803        | 2189.9694      | 1095.4883        | E    | 884.4360  | 442.7216        | 867.4094       | 434.2084         | 866.4254       | 433.7164         | 8  |
| 18 | 2305.0327 | 1153.0200       | 2288.0062      | 1144.5067        | 2287.0222      | 1144.0147        | P    | 755.3934  | 378.2003        | 738.3668       | 369.6871         | 737.3828       | 369.1951         | 7  |
| 19 | 2402.0855 | 1201.5464       | 2385.0589      | 1193.0331        | 2384.0749      | 1192.5411        | P    | 658.3406  | 329.6740        | 641.3141       | 321.1607         | 640.3301       | 320.6687         | 6  |
| 20 | 2501.1539 | 1251.0806       | 2484.1274      | 1242.5673        | 2483.1433      | 1242.0753        | V    | 561.2879  | 281.1476        | 544.2613       | 272.6343         | 543.2773       | 272.1423         | 5  |
| 21 | 2629.2125 | 1315.1099       | 2612.1859      | 1306.5966        | 2611.2019      | 1306.1046        | Q    | 462.2195  | 231.6134        | 445.1929       | 223.1001         | 444.2089       | 222.6081         | 4  |
| 22 | 2758.2551 | 1379.6312       | 2741.2285      | 1371.1179        | 2740.2445      | 1370.6259        | E    | 334.1609  | 167.5841        |                |                  | 316.1503       | 158.5788         | 3  |
| 23 | 2845.2871 | 1423.1472       | 2828.2606      | 1414.6339        | 2827.2765      | 1414.1419        | S    | 205.1183  | 103.0628        |                |                  | 187.1077       | 94.0575          | 2  |
| 24 |           |                 |                |                  |                |                  | V    | 118.0863  | 59.5468         |                |                  |                |                  | 1  |

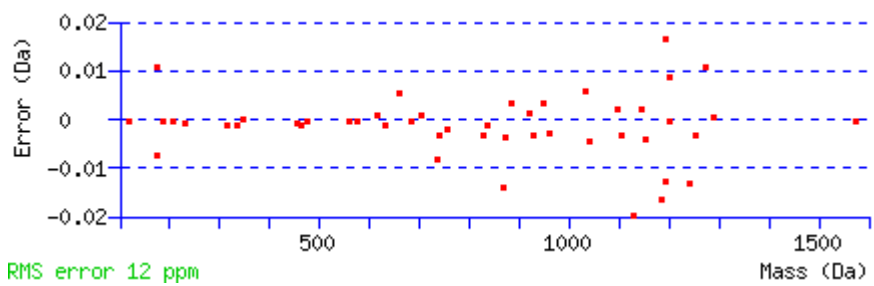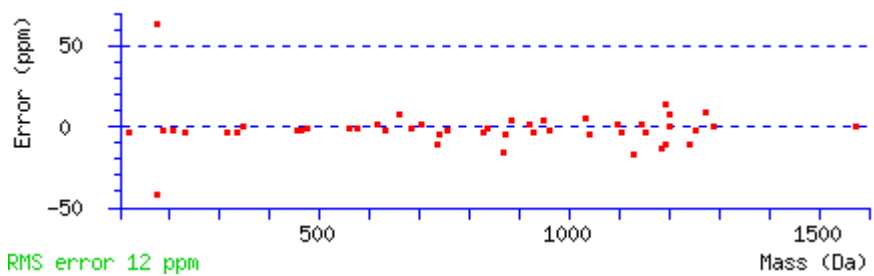

IDENTIFICATION 7

MS/MS Fragmentation of **AVKPEPTNSSVEVSPDIYQQVRDELKR**

Found in **Q9UPW6**, DNA-binding protein SATB2 OS=Homo sapiens GN=SATB2 PE=1 SV=2

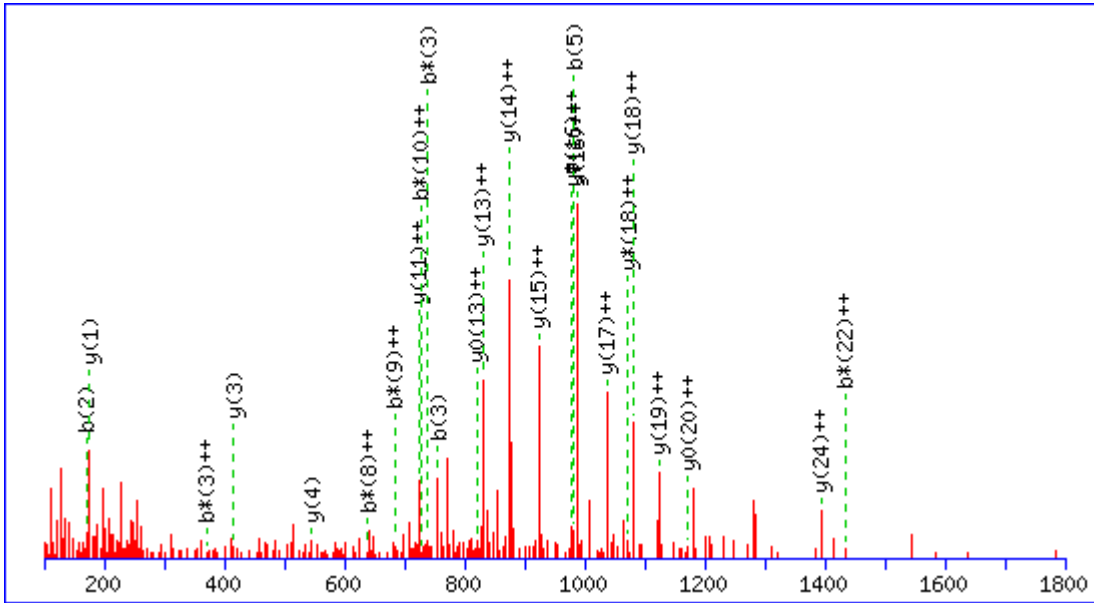

Monoisotopic mass of neutral peptide Mr(calc): 3541.7648

Variable modifications:

K3 : Sumo 3 (K)

N8 : Deamidated (NQ)

Ions Score: 25 Expect: 7.9

| #  | b         | b <sup>++</sup> | b <sup>*</sup> | b <sup>+++</sup> | b <sup>0</sup> | b <sup>0++</sup> | Seq. | y         | y <sup>++</sup> | y <sup>*</sup> | y <sup>+++</sup> | y <sup>0</sup> | y <sup>0++</sup> | #  |
|----|-----------|-----------------|----------------|------------------|----------------|------------------|------|-----------|-----------------|----------------|------------------|----------------|------------------|----|
| 1  | 72.0444   | 36.5258         |                |                  |                |                  | A    |           |                 |                |                  |                |                  | 27 |
| 2  | 171.1128  | 86.0600         |                |                  |                |                  | V    | 3471.7350 | 1736.3712       | 3454.7085      | 1727.8579        | 3453.7245      | 1727.3659        | 26 |
| 3  | 756.3999  | 378.7036        | 739.3733       | 370.1903         |                |                  | K    | 3372.6666 | 1686.8369       | 3355.6401      | 1678.3237        | 3354.6561      | 1677.8317        | 25 |
| 4  | 853.4526  | 427.2300        | 836.4261       | 418.7167         |                |                  | P    | 2787.3795 | 1394.1934       | 2770.3530      | 1385.6801        | 2769.3690      | 1385.1881        | 24 |
| 5  | 982.4952  | 491.7513        | 965.4687       | 483.2380         | 964.4847       | 482.7460         | E    | 2690.3268 | 1345.6670       | 2673.3002      | 1337.1538        | 2672.3162      | 1336.6617        | 23 |
| 6  | 1079.5480 | 540.2776        | 1062.5215      | 531.7644         | 1061.5374      | 531.2724         | P    | 2561.2842 | 1281.1457       | 2544.2576      | 1272.6325        | 2543.2736      | 1272.1404        | 22 |
| 7  | 1180.5957 | 590.8015        | 1163.5691      | 582.2882         | 1162.5851      | 581.7962         | T    | 2464.2314 | 1232.6193       | 2447.2049      | 1224.1061        | 2446.2209      | 1223.6141        | 21 |
| 8  | 1295.6226 | 648.3149        | 1278.5961      | 639.8017         | 1277.6121      | 639.3097         | N    | 2363.1837 | 1182.0955       | 2346.1572      | 1173.5822        | 2345.1732      | 1173.0902        | 20 |
| 9  | 1382.6546 | 691.8310        | 1365.6281      | 683.3177         | 1364.6441      | 682.8257         | S    | 2248.1568 | 1124.5820       | 2231.1303      | 1116.0688        | 2230.1462      | 1115.5768        | 19 |
| 10 | 1469.6867 | 735.3470        | 1452.6601      | 726.8337         | 1451.6761      | 726.3417         | S    | 2161.1248 | 1081.0660       | 2144.0982      | 1072.5527        | 2143.1142      | 1072.0607        | 18 |
| 11 | 1568.7551 | 784.8812        | 1551.7285      | 776.3679         | 1550.7445      | 775.8759         | V    | 2074.0927 | 1037.5500       | 2057.0662      | 1029.0367        | 2056.0822      | 1028.5447        | 17 |
| 12 | 1697.7977 | 849.4025        | 1680.7711      | 840.8892         | 1679.7871      | 840.3972         | E    | 1975.0243 | 988.0158        | 1957.9978      | 979.5025         | 1957.0138      | 979.0105         | 16 |
| 13 | 1796.8661 | 898.9367        | 1779.8395      | 890.4234         | 1778.8555      | 889.9314         | V    | 1845.9817 | 923.4945        | 1828.9552      | 914.9812         | 1827.9712      | 914.4892         | 15 |
| 14 | 1883.8981 | 942.4527        | 1866.8716      | 933.9394         | 1865.8876      | 933.4474         | S    | 1746.9133 | 873.9603        | 1729.8868      | 865.4470         | 1728.9028      | 864.9550         | 14 |
| 15 | 1980.9509 | 990.9791        | 1963.9243      | 982.4658         | 1962.9403      | 981.9738         | P    | 1659.8813 | 830.4443        | 1642.8547      | 821.9310         | 1641.8707      | 821.4390         | 13 |
| 16 | 2095.9778 | 1048.4926       | 2078.9513      | 1039.9793        | 2077.9673      | 1039.4873        | D    | 1562.8285 | 781.9179        | 1545.8020      | 773.4046         | 1544.8180      | 772.9126         | 12 |
| 17 | 2209.0619 | 1105.0346       | 2192.0353      | 1096.5213        | 2191.0513      | 1096.0293        | I    | 1447.8016 | 724.4044        | 1430.7750      | 715.8912         | 1429.7910      | 715.3992         | 11 |
| 18 | 2372.1252 | 1186.5663       | 2355.0987      | 1178.0530        | 2354.1147      | 1177.5610        | Y    | 1334.7175 | 667.8624        | 1317.6910      | 659.3491         | 1316.7070      | 658.8571         | 10 |
| 19 | 2500.1838 | 1250.5955       | 2483.1573      | 1242.0823        | 2482.1732      | 1241.5903        | Q    | 1171.6542 | 586.3307        | 1154.6276      | 577.8175         | 1153.6436      | 577.3255         | 9  |
| 20 | 2628.2424 | 1314.6248       | 2611.2158      | 1306.1116        | 2610.2318      | 1305.6195        | Q    | 1043.5956 | 522.3014        | 1026.5691      | 513.7882         | 1025.5851      | 513.2962         | 8  |
| 21 | 2727.3108 | 1364.1590       | 2710.2842      | 1355.6458        | 2709.3002      | 1355.1538        | V    | 915.5370  | 458.2722        | 898.5105       | 449.7589         | 897.5265       | 449.2669         | 7  |
| 22 | 2883.4119 | 1442.2096       | 2866.3854      | 1433.6963        | 2865.4013      | 1433.2043        | R    | 816.4686  | 408.7380        | 799.4421       | 400.2247         | 798.4581       | 399.7327         | 6  |
| 23 | 2998.4389 | 1499.7231       | 2981.4123      | 1491.2098        | 2980.4283      | 1490.7178        | D    | 660.3675  | 330.6874        | 643.3410       | 322.1741         | 642.3570       | 321.6821         | 5  |
| 24 | 3127.4814 | 1564.2444       | 3110.4549      | 1555.7311        | 3109.4709      | 1555.2391        | E    | 545.3406  | 273.1739        | 528.3140       | 264.6606         | 527.3300       | 264.1686         | 4  |
| 25 | 3240.5655 | 1620.7864       | 3223.5390      | 1612.2731        | 3222.5549      | 1611.7811        | L    | 416.2980  | 208.6526        | 399.2714       | 200.1394         |                |                  | 3  |
| 26 | 3368.6605 | 1684.8339       | 3351.6339      | 1676.3206        | 3350.6499      | 1675.8286        | K    | 303.2139  | 152.1106        | 286.1874       | 143.5973         |                |                  | 2  |

|    |  |  |  |  |  |  |   |          |         |          |         |  |  |   |
|----|--|--|--|--|--|--|---|----------|---------|----------|---------|--|--|---|
| 27 |  |  |  |  |  |  | R | 175.1190 | 88.0631 | 158.0924 | 79.5498 |  |  | 1 |
|----|--|--|--|--|--|--|---|----------|---------|----------|---------|--|--|---|

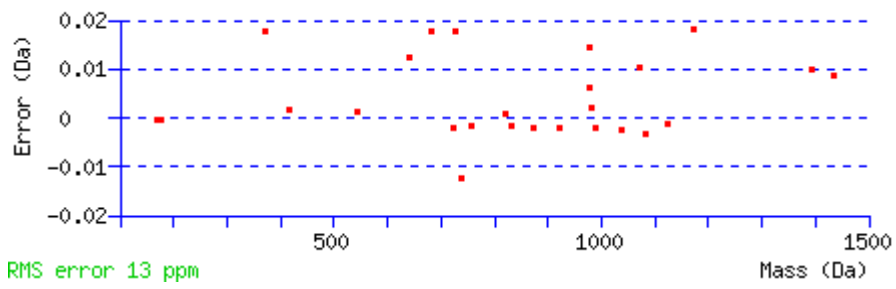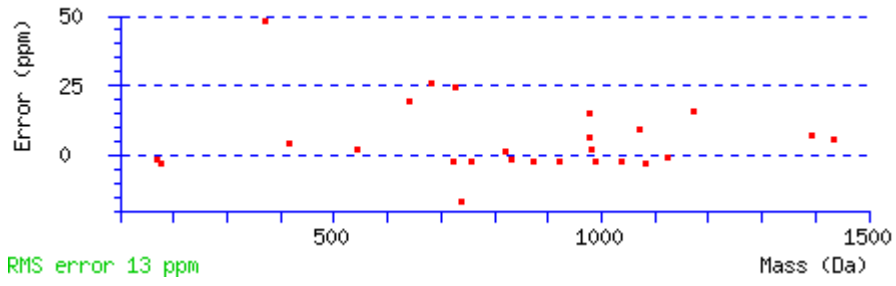

IDENTIFICATION 8

MS/MS Fragmentation of **DRIAKEEGA**

Found in **P39023**, 60S ribosomal protein L3 OS=Homo sapiens GN=RPL3 PE=1 SV=2

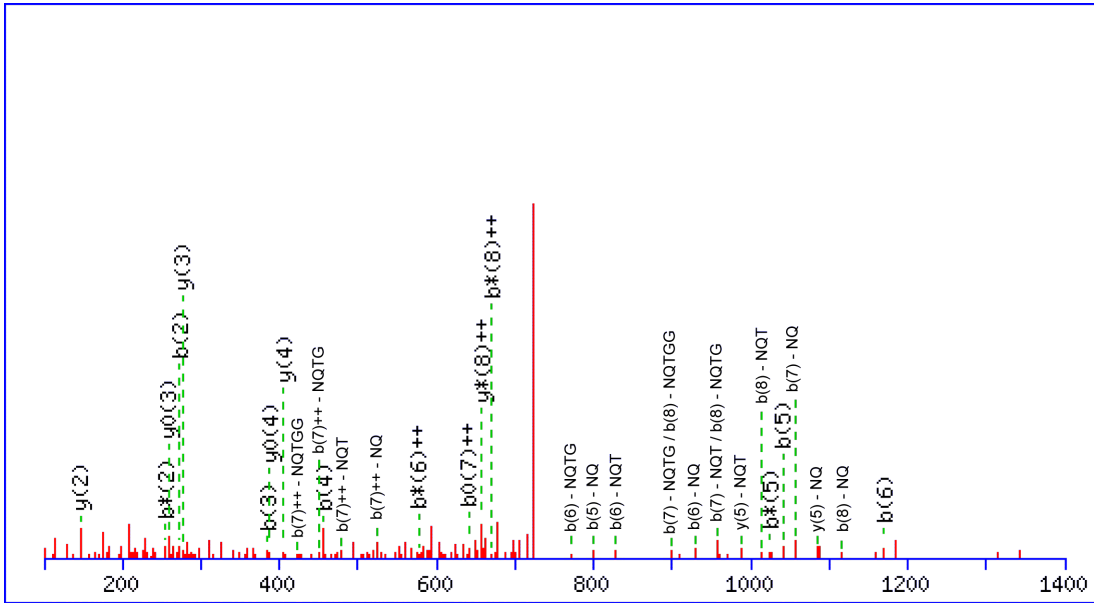

Monoisotopic mass of neutral peptide  $M_r(\text{calc})$ : 1444.6906

Variable modifications:

K5 : Sumo 3 (K)

Ions Score: 1 Expect: 9.5e+02

| # | b         | b <sup>++</sup> | b <sup>*</sup> | b <sup>+++</sup> | b <sup>0</sup> | b <sup>0++</sup> | Seq. | y         | y <sup>++</sup> | y <sup>*</sup> | y <sup>+++</sup> | y <sup>0</sup> | y <sup>0++</sup> | # |
|---|-----------|-----------------|----------------|------------------|----------------|------------------|------|-----------|-----------------|----------------|------------------|----------------|------------------|---|
| 1 | 116.0342  | 58.5207         |                |                  | 98.0237        | 49.5155          | D    |           |                 |                |                  |                |                  | 9 |
| 2 | 272.1353  | 136.5713        | 255.1088       | 128.0580         | 254.1248       | 127.5660         | R    | 1330.6710 | 665.8391        | 1313.6444      | 657.3258         | 1312.6604      | 656.8338         | 8 |
| 3 | 385.2194  | 193.1133        | 368.1928       | 184.6001         | 367.2088       | 184.1081         | I    | 1174.5699 | 587.7886        | 1157.5433      | 579.2753         | 1156.5593      | 578.7833         | 7 |
| 4 | 456.2565  | 228.6319        | 439.2300       | 220.1186         | 438.2459       | 219.6266         | A    | 1061.4858 | 531.2465        | 1044.4592      | 522.7333         | 1043.4752      | 522.2413         | 6 |
| 5 | 1041.5436 | 521.2754        | 1024.5170      | 512.7622         | 1023.5330      | 512.2701         | K    | 990.4487  | 495.7280        | 973.4221       | 487.2147         | 972.4381       | 486.7227         | 5 |
| 6 | 1170.5862 | 585.7967        | 1153.5596      | 577.2835         | 1152.5756      | 576.7914         | E    | 405.1616  | 203.0844        |                |                  | 387.1510       | 194.0792         | 4 |
| 7 | 1299.6288 | 650.3180        | 1282.6022      | 641.8047         | 1281.6182      | 641.3127         | E    | 276.1190  | 138.5631        |                |                  | 258.1084       | 129.5579         | 3 |
| 8 | 1356.6502 | 678.8288        | 1339.6237      | 670.3155         | 1338.6397      | 669.8235         | G    | 147.0764  | 74.0418         |                |                  |                |                  | 2 |
| 9 |           |                 |                |                  |                |                  | A    | 90.0550   | 45.5311         |                |                  |                |                  | 1 |

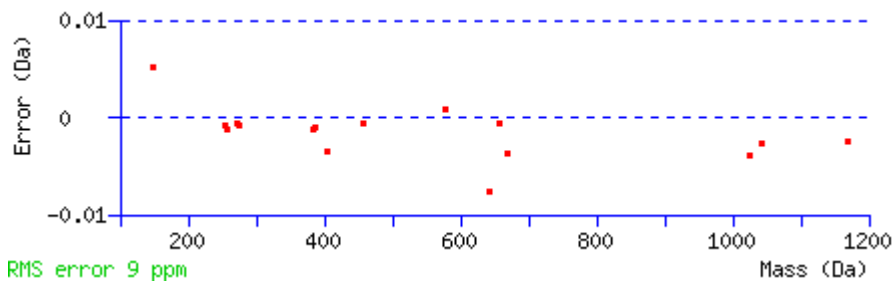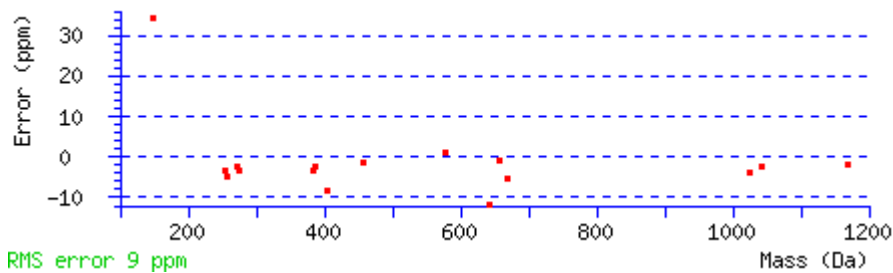

IDENTIFICATION 9

MS/MS Fragmentation of **HIKEEPLSEEEPCTSTAIASPEKK**

Found in **Q9Y2X3**, Nucleolar protein 58 OS=Homo sapiens GN=NOP58 PE=1 SV=1

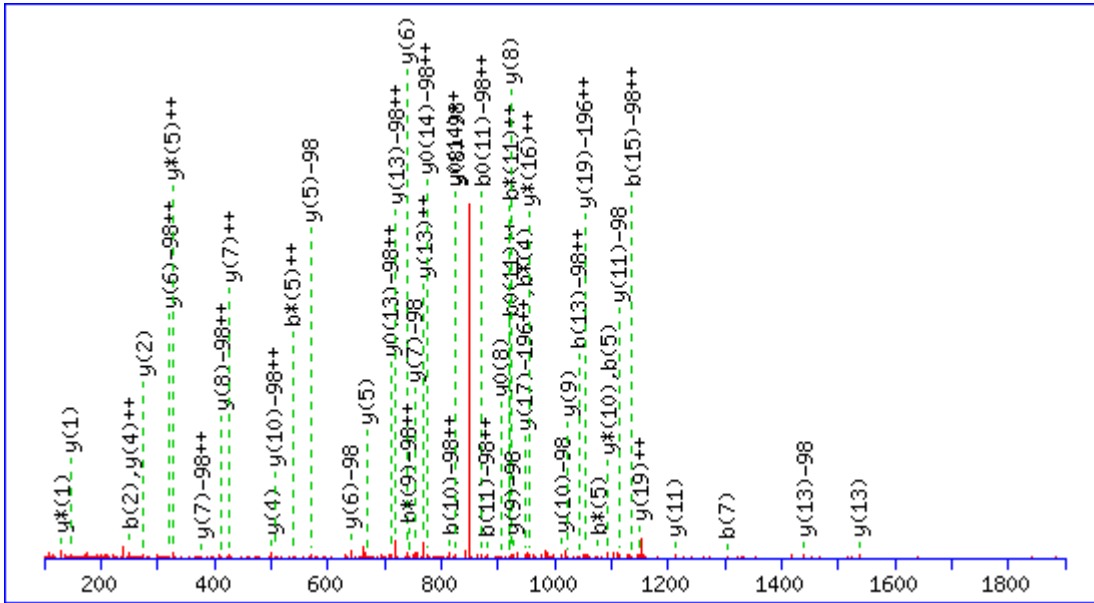

Monoisotopic mass of neutral peptide Mr(calc): 3394.4676

Variable modifications:

K3 : Sumo 3 (K)

S8 : Phospho (ST), with neutral losses 97.9769 (shown in table), 0.0000

C13 : Nethylmaleimide (C)

S20 : Phospho (ST), with neutral losses 97.9769 (shown in table), 0.0000

Ions Score: 13 Expect: 4.7e+02

| #  | b         | b <sup>++</sup> | b <sup>*</sup> | b <sup>+++</sup> | b <sup>0</sup> | b <sup>0++</sup> | Seq. | y         | y <sup>++</sup> | y <sup>*</sup> | y <sup>+++</sup> | y <sup>0</sup> | y <sup>0++</sup> | #  |
|----|-----------|-----------------|----------------|------------------|----------------|------------------|------|-----------|-----------------|----------------|------------------|----------------|------------------|----|
| 1  | 138.0662  | 69.5367         |                |                  |                |                  | H    |           |                 |                |                  |                |                  | 24 |
| 2  | 251.1503  | 126.0788        |                |                  |                |                  | I    | 3062.4623 | 1531.7348       | 3045.4357      | 1523.2215        | 3044.4517      | 1522.7295        | 23 |
| 3  | 836.4373  | 418.7223        | 819.4108       | 410.2090         |                |                  | K    | 2949.3782 | 1475.1927       | 2932.3517      | 1466.6795        | 2931.3677      | 1466.1875        | 22 |
| 4  | 965.4799  | 483.2436        | 948.4534       | 474.7303         | 947.4694       | 474.2383         | E    | 2364.0911 | 1182.5492       | 2347.0646      | 1174.0359        | 2346.0806      | 1173.5439        | 21 |
| 5  | 1094.5225 | 547.7649        | 1077.4960      | 539.2516         | 1076.5119      | 538.7596         | E    | 2235.0486 | 1118.0279       | 2218.0220      | 1109.5146        | 2217.0380      | 1109.0226        | 20 |
| 6  | 1191.5753 | 596.2913        | 1174.5487      | 587.7780         | 1173.5647      | 587.2860         | P    | 2106.0060 | 1053.5066       | 2088.9794      | 1044.9933        | 2087.9954      | 1044.5013        | 19 |
| 7  | 1304.6593 | 652.8333        | 1287.6328      | 644.3200         | 1286.6488      | 643.8280         | L    | 2008.9532 | 1004.9802       | 1991.9267      | 996.4670         | 1990.9426      | 995.9750         | 18 |
| 8  | 1373.6808 | 687.3440        | 1356.6543      | 678.8308         | 1355.6702      | 678.3388         | S    | 1895.8691 | 948.4382        | 1878.8426      | 939.9249         | 1877.8586      | 939.4329         | 17 |
| 9  | 1502.7234 | 751.8653        | 1485.6968      | 743.3521         | 1484.7128      | 742.8601         | E    | 1826.8477 | 913.9275        | 1809.8211      | 905.4142         | 1808.8371      | 904.9222         | 16 |
| 10 | 1631.7660 | 816.3866        | 1614.7394      | 807.8734         | 1613.7554      | 807.3814         | E    | 1697.8051 | 849.4062        | 1680.7785      | 840.8929         | 1679.7945      | 840.4009         | 15 |
| 11 | 1760.8086 | 880.9079        | 1743.7820      | 872.3947         | 1742.7980      | 871.9026         | E    | 1568.7625 | 784.8849        | 1551.7359      | 776.3716         | 1550.7519      | 775.8796         | 14 |
| 12 | 1857.8613 | 929.4343        | 1840.8348      | 920.9210         | 1839.8508      | 920.4290         | P    | 1439.7199 | 720.3636        | 1422.6933      | 711.8503         | 1421.7093      | 711.3583         | 13 |
| 13 | 2085.9182 | 1043.4627       | 2068.8917      | 1034.9495        | 2067.9076      | 1034.4575        | C    | 1342.6671 | 671.8372        | 1325.6406      | 663.3239         | 1324.6566      | 662.8319         | 12 |
| 14 | 2186.9659 | 1093.9866       | 2169.9393      | 1085.4733        | 2168.9553      | 1084.9813        | T    | 1114.6103 | 557.8088        | 1097.5837      | 549.2955         | 1096.5997      | 548.8035         | 11 |
| 15 | 2273.9979 | 1137.5026       | 2256.9714      | 1128.9893        | 2255.9874      | 1128.4973        | S    | 1013.5626 | 507.2849        | 996.5360       | 498.7717         | 995.5520       | 498.2796         | 10 |
| 16 | 2375.0456 | 1188.0264       | 2358.0190      | 1179.5132        | 2357.0350      | 1179.0212        | T    | 926.5306  | 463.7689        | 909.5040       | 455.2556         | 908.5200       | 454.7636         | 9  |
| 17 | 2446.0827 | 1223.5450       | 2429.0562      | 1215.0317        | 2428.0721      | 1214.5397        | A    | 825.4829  | 413.2451        | 808.4563       | 404.7318         | 807.4723       | 404.2398         | 8  |
| 18 | 2559.1668 | 1280.0870       | 2542.1402      | 1271.5738        | 2541.1562      | 1271.0817        | I    | 754.4458  | 377.7265        | 737.4192       | 369.2132         | 736.4352       | 368.7212         | 7  |
| 19 | 2630.2039 | 1315.6056       | 2613.1773      | 1307.0923        | 2612.1933      | 1306.6003        | A    | 641.3617  | 321.1845        | 624.3352       | 312.6712         | 623.3511       | 312.1792         | 6  |
| 20 | 2699.2254 | 1350.1163       | 2682.1988      | 1341.6030        | 2681.2148      | 1341.1110        | S    | 570.3246  | 285.6659        | 553.2980       | 277.1527         | 552.3140       | 276.6606         | 5  |
| 21 | 2796.2781 | 1398.6427       | 2779.2516      | 1390.1294        | 2778.2676      | 1389.6374        | P    | 501.3031  | 251.1552        | 484.2766       | 242.6419         | 483.2926       | 242.1499         | 4  |
| 22 | 2925.3207 | 1463.1640       | 2908.2942      | 1454.6507        | 2907.3101      | 1454.1587        | E    | 404.2504  | 202.6288        | 387.2238       | 194.1155         | 386.2398       | 193.6235         | 3  |
| 23 | 3053.4157 | 1527.2115       | 3036.3891      | 1518.6982        | 3035.4051      | 1518.2062        | K    | 275.2078  | 138.1075        | 258.1812       | 129.5942         |                |                  | 2  |
| 24 |           |                 |                |                  |                |                  | K    | 147.1128  | 74.0600         | 130.0863       | 65.5468          |                |                  | 1  |



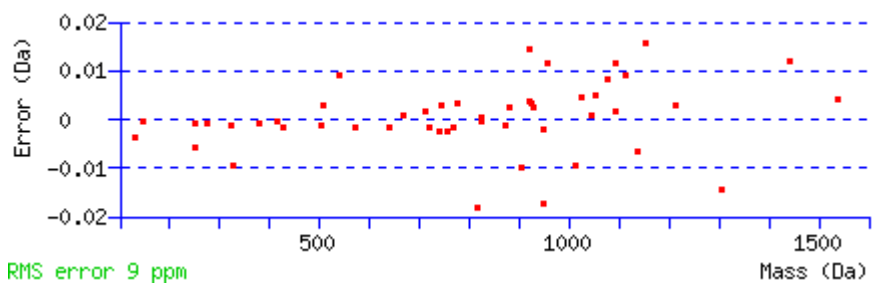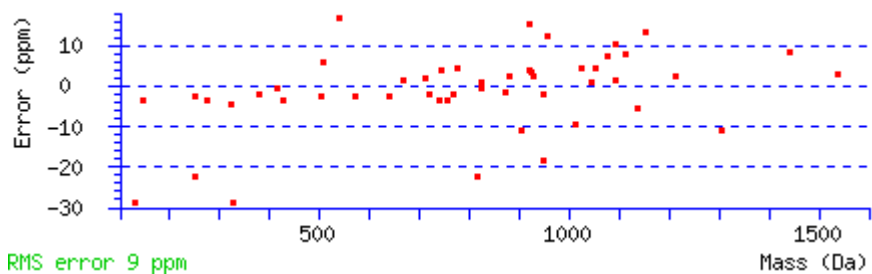

IDENTIFICATION 10

MS/MS Fragmentation of **IKADPDGPEAQAEACSGER**

Found in **Q9NX24**, H/A CA ribonucleoprotein complex subunit 2 OS=Homo sapiens GN=NHP2 PE=1 SV=1

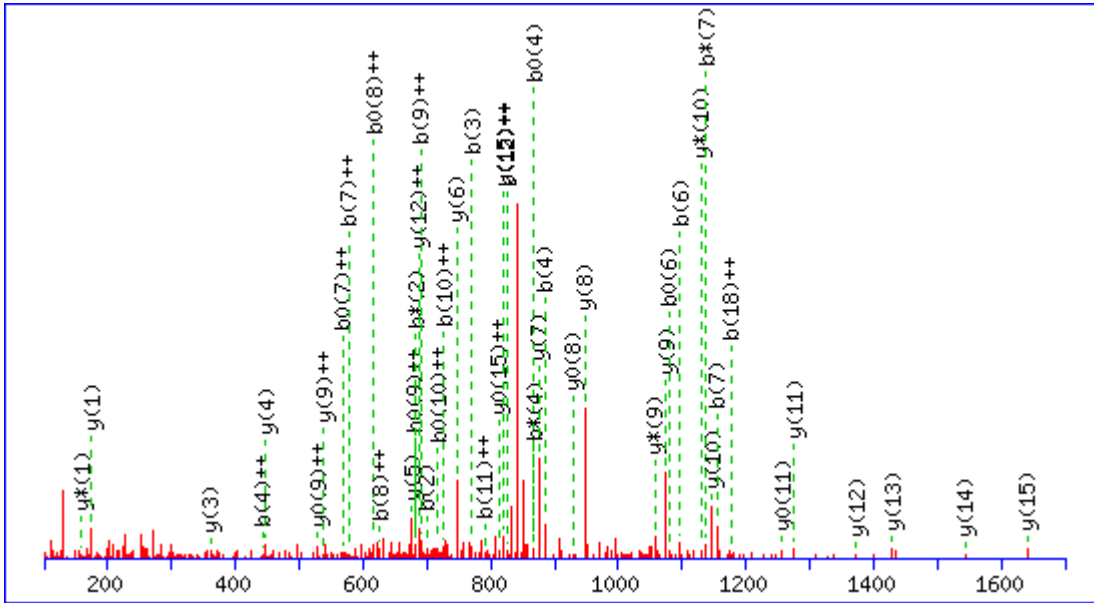

Monoisotopic mass of neutral peptide  $M_r(\text{calc})$ : 2525.1088

Variable modifications:

K2 : Sumo 3 (K)

C15 : Nethylmaleimide (C)

Ions Score: 100 Expect: 5.1e-07

| #  | b         | b <sup>++</sup> | b <sup>*</sup> | b <sup>+++</sup> | b <sup>0</sup> | b <sup>0++</sup> | Seq. | y         | y <sup>++</sup> | y <sup>*</sup> | y <sup>+++</sup> | y <sup>0</sup> | y <sup>0++</sup> | #  |
|----|-----------|-----------------|----------------|------------------|----------------|------------------|------|-----------|-----------------|----------------|------------------|----------------|------------------|----|
| 1  | 114.0913  | 57.5493         |                |                  |                |                  | I    |           |                 |                |                  |                |                  | 19 |
| 2  | 699.3784  | 350.1928        | 682.3519       | 341.6796         |                |                  | K    | 2413.0321 | 1207.0197       | 2396.0055      | 1198.5064        | 2395.0215      | 1198.0144        | 18 |
| 3  | 770.4155  | 385.7114        | 753.3890       | 377.1981         |                |                  | A    | 1827.7450 | 914.3761        | 1810.7184      | 905.8629         | 1809.7344      | 905.3709         | 17 |
| 4  | 885.4425  | 443.2249        | 868.4159       | 434.7116         | 867.4319       | 434.2196         | D    | 1756.7079 | 878.8576        | 1739.6813      | 870.3443         | 1738.6973      | 869.8523         | 16 |
| 5  | 982.4952  | 491.7513        | 965.4687       | 483.2380         | 964.4847       | 482.7460         | P    | 1641.6809 | 821.3441        | 1624.6544      | 812.8308         | 1623.6704      | 812.3388         | 15 |
| 6  | 1097.5222 | 549.2647        | 1080.4956      | 540.7515         | 1079.5116      | 540.2594         | D    | 1544.6282 | 772.8177        | 1527.6016      | 764.3045         | 1526.6176      | 763.8124         | 14 |
| 7  | 1154.5436 | 577.7755        | 1137.5171      | 569.2622         | 1136.5331      | 568.7702         | G    | 1429.6012 | 715.3043        | 1412.5747      | 706.7910         | 1411.5907      | 706.2990         | 13 |
| 8  | 1251.5964 | 626.3018        | 1234.5699      | 617.7886         | 1233.5858      | 617.2966         | P    | 1372.5798 | 686.7935        | 1355.5532      | 678.2802         | 1354.5692      | 677.7882         | 12 |
| 9  | 1380.6390 | 690.8231        | 1363.6125      | 682.3099         | 1362.6284      | 681.8179         | E    | 1275.5270 | 638.2671        | 1258.5005      | 629.7539         | 1257.5164      | 629.2619         | 11 |
| 10 | 1451.6761 | 726.3417        | 1434.6496      | 717.8284         | 1433.6655      | 717.3364         | A    | 1146.4844 | 573.7458        | 1129.4579      | 565.2326         | 1128.4738      | 564.7406         | 10 |
| 11 | 1579.7347 | 790.3710        | 1562.7081      | 781.8577         | 1561.7241      | 781.3657         | Q    | 1075.4473 | 538.2273        | 1058.4208      | 529.7140         | 1057.4367      | 529.2220         | 9  |
| 12 | 1650.7718 | 825.8895        | 1633.7453      | 817.3763         | 1632.7612      | 816.8843         | A    | 947.3887  | 474.1980        | 930.3622       | 465.6847         | 929.3782       | 465.1927         | 8  |
| 13 | 1779.8144 | 890.4108        | 1762.7878      | 881.8976         | 1761.8038      | 881.4056         | E    | 876.3516  | 438.6794        | 859.3251       | 430.1662         | 858.3410       | 429.6742         | 7  |
| 14 | 1850.8515 | 925.9294        | 1833.8250      | 917.4161         | 1832.8409      | 916.9241         | A    | 747.3090  | 374.1581        | 730.2825       | 365.6449         | 729.2985       | 365.1529         | 6  |
| 15 | 2078.9084 | 1039.9578       | 2061.8818      | 1031.4446        | 2060.8978      | 1030.9525        | C    | 676.2719  | 338.6396        | 659.2454       | 330.1263         | 658.2613       | 329.6343         | 5  |
| 16 | 2165.9404 | 1083.4738       | 2148.9139      | 1074.9606        | 2147.9298      | 1074.4686        | S    | 448.2150  | 224.6112        | 431.1885       | 216.0979         | 430.2045       | 215.6059         | 4  |
| 17 | 2222.9619 | 1111.9846       | 2205.9353      | 1103.4713        | 2204.9513      | 1102.9793        | G    | 361.1830  | 181.0951        | 344.1565       | 172.5819         | 343.1724       | 172.0899         | 3  |
| 18 | 2352.0045 | 1176.5059       | 2334.9779      | 1167.9926        | 2333.9939      | 1167.5006        | E    | 304.1615  | 152.5844        | 287.1350       | 144.0711         | 286.1510       | 143.5791         | 2  |
| 19 |           |                 |                |                  |                |                  | R    | 175.1190  | 88.0631         | 158.0924       | 79.5498          |                |                  | 1  |

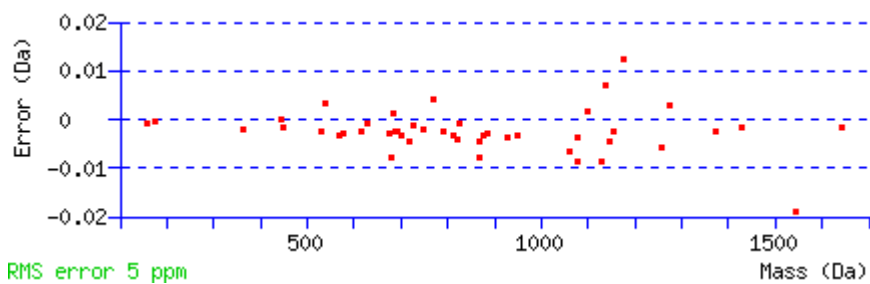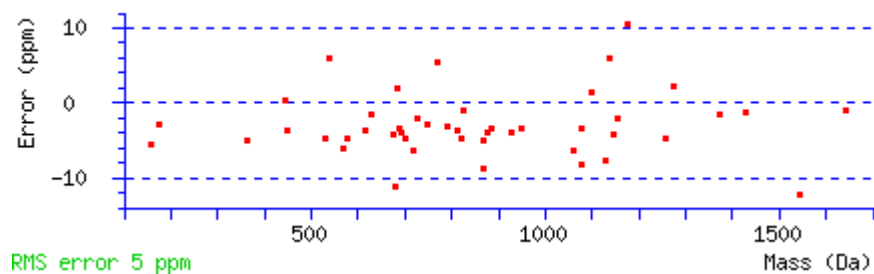

IDENTIFICATION 11

MS/MS Fragmentation of **KGTPWEGGLFK**

Found in **P63279**, SUMO-conjugating enzyme UBC9 OS=Homo sapiens GN=UBE2I PE=1 SV=1

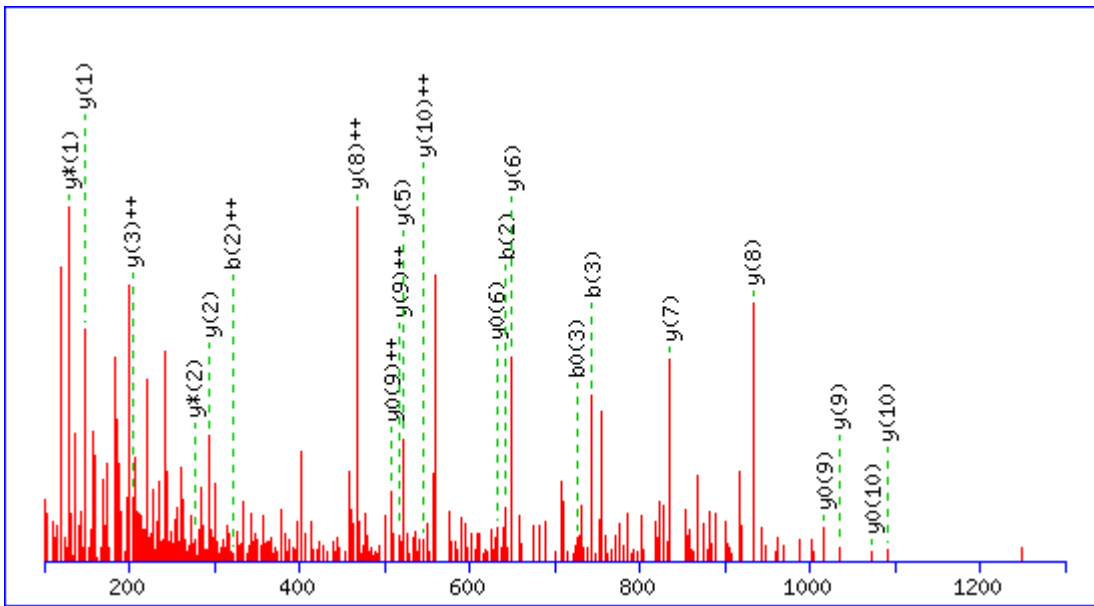

Monoisotopic mass of neutral peptide  $M_r(\text{calc})$ : 1675.8318

Variable modifications:

K1 : Sumo 3 (K)

Ions Score: 26 Expect: 2.9

| #  | b         | b <sup>++</sup> | b <sup>*</sup> | b <sup>+++</sup> | b <sup>0</sup> | b <sup>0++</sup> | Seq. | y         | y <sup>++</sup> | y <sup>*</sup> | y <sup>+++</sup> | y <sup>0</sup> | y <sup>0++</sup> | #  |
|----|-----------|-----------------|----------------|------------------|----------------|------------------|------|-----------|-----------------|----------------|------------------|----------------|------------------|----|
| 1  | 586.2944  | 293.6508        | 569.2678       | 285.1375         |                |                  | K    |           |                 |                |                  |                |                  | 11 |
| 2  | 643.3158  | 322.1615        | 626.2893       | 313.6483         |                |                  | G    | 1091.5520 | 546.2796        | 1074.5255      | 537.7664         | 1073.5415      | 537.2744         | 10 |
| 3  | 744.3635  | 372.6854        | 727.3369       | 364.1721         | 726.3529       | 363.6801         | T    | 1034.5306 | 517.7689        | 1017.5040      | 509.2556         | 1016.5200      | 508.7636         | 9  |
| 4  | 841.4163  | 421.2118        | 824.3897       | 412.6985         | 823.4057       | 412.2065         | P    | 933.4829  | 467.2451        | 916.4563       | 458.7318         | 915.4723       | 458.2398         | 8  |
| 5  | 1027.4956 | 514.2514        | 1010.4690      | 505.7381         | 1009.4850      | 505.2461         | W    | 836.4301  | 418.7187        | 819.4036       | 410.2054         | 818.4196       | 409.7134         | 7  |
| 6  | 1156.5382 | 578.7727        | 1139.5116      | 570.2594         | 1138.5276      | 569.7674         | E    | 650.3508  | 325.6790        | 633.3243       | 317.1658         | 632.3402       | 316.6738         | 6  |
| 7  | 1213.5596 | 607.2835        | 1196.5331      | 598.7702         | 1195.5491      | 598.2782         | G    | 521.3082  | 261.1577        | 504.2817       | 252.6445         |                |                  | 5  |
| 8  | 1270.5811 | 635.7942        | 1253.5545      | 627.2809         | 1252.5705      | 626.7889         | G    | 464.2867  | 232.6470        | 447.2602       | 224.1337         |                |                  | 4  |
| 9  | 1383.6652 | 692.3362        | 1366.6386      | 683.8229         | 1365.6546      | 683.3309         | L    | 407.2653  | 204.1363        | 390.2387       | 195.6230         |                |                  | 3  |
| 10 | 1530.7336 | 765.8704        | 1513.7070      | 757.3571         | 1512.7230      | 756.8651         | F    | 294.1812  | 147.5942        | 277.1547       | 139.0810         |                |                  | 2  |
| 11 |           |                 |                |                  |                |                  | K    | 147.1128  | 74.0600         | 130.0863       | 65.5468          |                |                  | 1  |

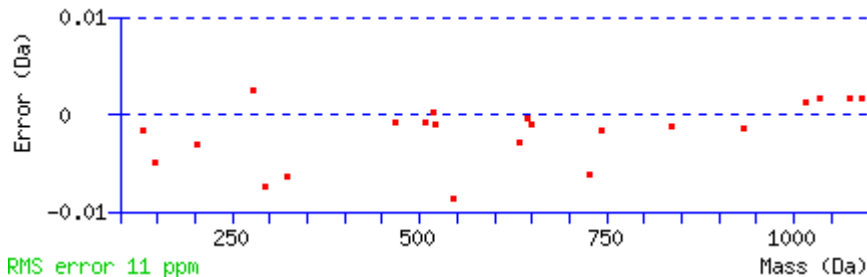

RMS error 11 ppm

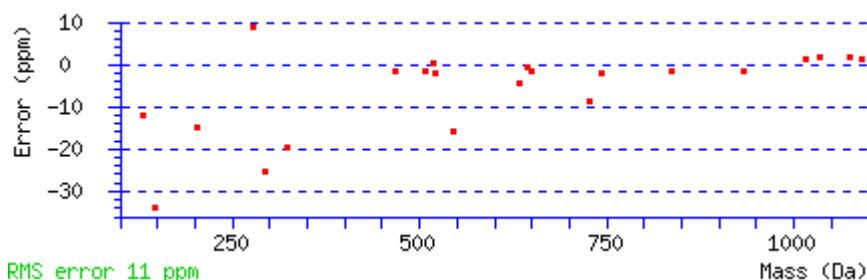

RMS error 11 ppm



IDENTIFICATION 12

MS/MS Fragmentation of **KQLATK**

Found in **Q16695**, Histone H3.1t OS=Homo sapiens GN=HIST3H3 PE=1 SV=3

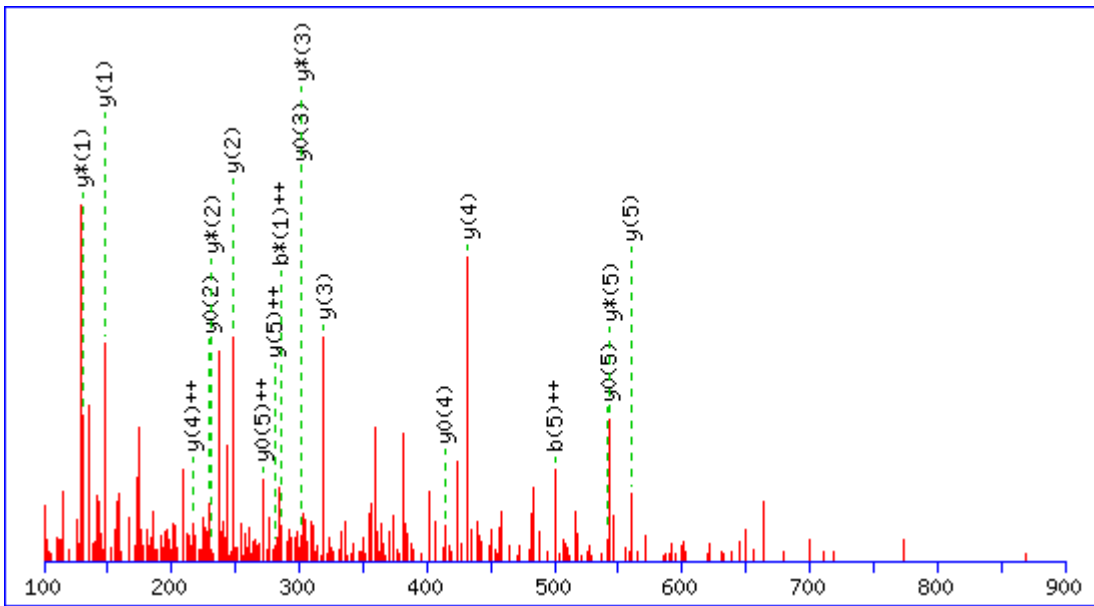

Monoisotopic mass of neutral peptide  $M_r(\text{calc})$ : 1144.6200

Variable modifications:

K1 : Sumo 3 (K)

Ions Score: 17 Expect: 9.6

| # | b        | b <sup>++</sup> | b <sup>*</sup> | b <sup>+++</sup> | b <sup>0</sup> | b <sup>0++</sup> | Seq. | y        | y <sup>++</sup> | y <sup>*</sup> | y <sup>+++</sup> | y <sup>0</sup> | y <sup>0++</sup> | # |
|---|----------|-----------------|----------------|------------------|----------------|------------------|------|----------|-----------------|----------------|------------------|----------------|------------------|---|
| 1 | 586.2944 | 293.6508        | 569.2678       | 285.1375         |                |                  | K    |          |                 |                |                  |                |                  | 6 |
| 2 | 714.3529 | 357.6801        | 697.3264       | 349.1668         |                |                  | Q    | 560.3402 | 280.6738        | 543.3137       | 272.1605         | 542.3297       | 271.6685         | 5 |
| 3 | 827.4370 | 414.2221        | 810.4104       | 405.7089         |                |                  | L    | 432.2817 | 216.6445        | 415.2551       | 208.1312         | 414.2711       | 207.6392         | 4 |
| 4 | 898.4741 | 449.7407        | 881.4476       | 441.2274         |                |                  | A    | 319.1976 | 160.1024        | 302.1710       | 151.5892         | 301.1870       | 151.0972         | 3 |
| 5 | 999.5218 | 500.2645        | 982.4952       | 491.7513         | 981.5112       | 491.2592         | T    | 248.1605 | 124.5839        | 231.1339       | 116.0706         | 230.1499       | 115.5786         | 2 |
| 6 |          |                 |                |                  |                |                  | K    | 147.1128 | 74.0600         | 130.0863       | 65.5468          |                |                  | 1 |

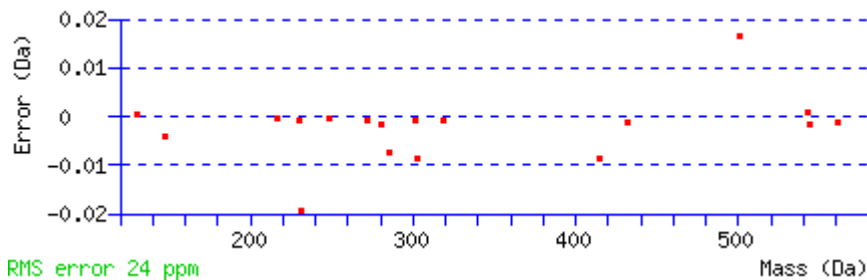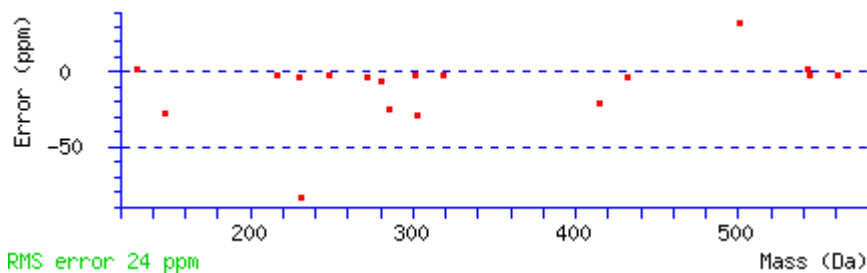

IDENTIFICATION 13

MS/MS Fragmentation of **LSLPESTESFHEPSQELKFSVEQR**

Found in **Q9H2Y7**, Zinc finger protein 106 homolog OS=Homo sapiens GN=ZFP106 PE=1 SV=1

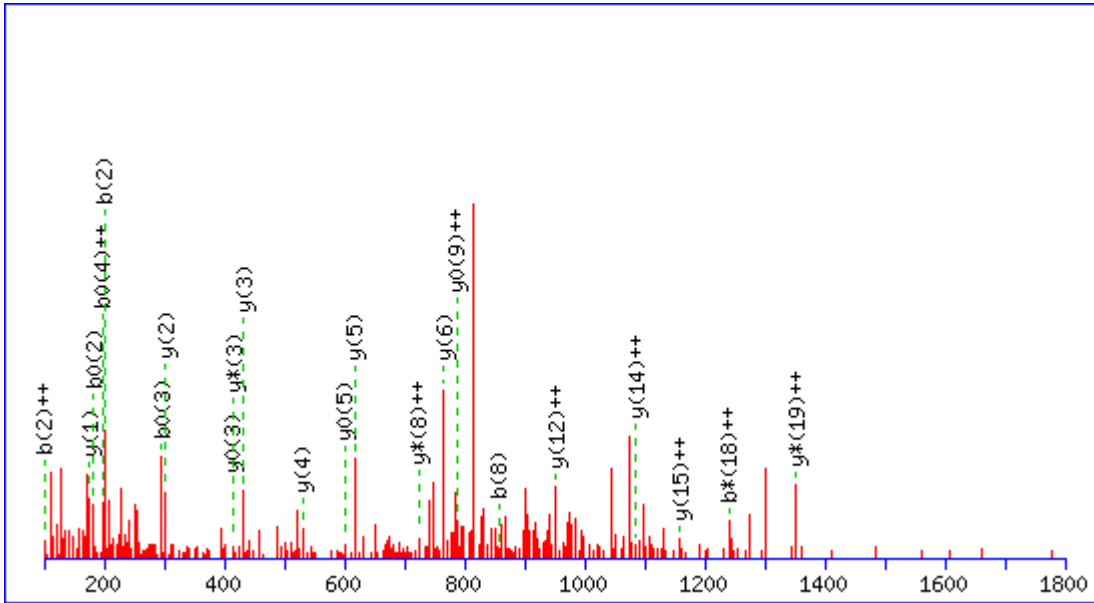

Monoisotopic mass of neutral peptide Mr(calc): 3260.5585 Variable modifications: K18 : Sumo 3 (K) Ions Score: 3 Expect: 2.7e+03

| #  | b         | b <sup>++</sup> | b <sup>*</sup> | b <sup>+++</sup> | b <sup>0</sup> | b <sup>0++</sup> | Seq. | y         | y <sup>++</sup> | y <sup>*</sup> | y <sup>+++</sup> | y <sup>0</sup> | y <sup>0++</sup> | #  |
|----|-----------|-----------------|----------------|------------------|----------------|------------------|------|-----------|-----------------|----------------|------------------|----------------|------------------|----|
| 1  | 114.0913  | 57.5493         |                |                  |                |                  | L    |           |                 |                |                  |                |                  | 24 |
| 2  | 201.1234  | 101.0653        |                |                  | 183.1128       | 92.0600          | S    | 3148.4818 | 1574.7445       | 3131.4552      | 1566.2313        | 3130.4712      | 1565.7392        | 23 |
| 3  | 314.2074  | 157.6074        |                |                  | 296.1969       | 148.6021         | L    | 3061.4497 | 1531.2285       | 3044.4232      | 1522.7152        | 3043.4392      | 1522.2232        | 22 |
| 4  | 411.2602  | 206.1337        |                |                  | 393.2496       | 197.1285         | P    | 2948.3657 | 1474.6865       | 2931.3391      | 1466.1732        | 2930.3551      | 1465.6812        | 21 |
| 5  | 540.3028  | 270.6550        |                |                  | 522.2922       | 261.6498         | E    | 2851.3129 | 1426.1601       | 2834.2864      | 1417.6468        | 2833.3024      | 1417.1548        | 20 |
| 6  | 627.3348  | 314.1710        |                |                  | 609.3243       | 305.1658         | S    | 2722.2703 | 1361.6388       | 2705.2438      | 1353.1255        | 2704.2598      | 1352.6335        | 19 |
| 7  | 728.3825  | 364.6949        |                |                  | 710.3719       | 355.6896         | T    | 2635.2383 | 1318.1228       | 2618.2117      | 1309.6095        | 2617.2277      | 1309.1175        | 18 |
| 8  | 857.4251  | 429.2162        |                |                  | 839.4145       | 420.2109         | E    | 2534.1906 | 1267.5989       | 2517.1641      | 1259.0857        | 2516.1801      | 1258.5937        | 17 |
| 9  | 944.4571  | 472.7322        |                |                  | 926.4466       | 463.7269         | S    | 2405.1480 | 1203.0777       | 2388.1215      | 1194.5644        | 2387.1375      | 1194.0724        | 16 |
| 10 | 1091.5255 | 546.2664        |                |                  | 1073.5150      | 537.2611         | F    | 2318.1160 | 1159.5616       | 2301.0894      | 1151.0484        | 2300.1054      | 1150.5564        | 15 |
| 11 | 1228.5844 | 614.7959        |                |                  | 1210.5739      | 605.7906         | H    | 2171.0476 | 1086.0274       | 2154.0210      | 1077.5142        | 2153.0370      | 1077.0221        | 14 |
| 12 | 1357.6270 | 679.3172        |                |                  | 1339.6165      | 670.3119         | E    | 2033.9887 | 1017.4980       | 2016.9621      | 1008.9847        | 2015.9781      | 1008.4927        | 13 |
| 13 | 1454.6798 | 727.8435        |                |                  | 1436.6692      | 718.8383         | P    | 1904.9461 | 952.9767        | 1887.9195      | 944.4634         | 1886.9355      | 943.9714         | 12 |
| 14 | 1541.7118 | 771.3596        |                |                  | 1523.7013      | 762.3543         | S    | 1807.8933 | 904.4503        | 1790.8668      | 895.9370         | 1789.8828      | 895.4450         | 11 |
| 15 | 1669.7704 | 835.3888        | 1652.7439      | 826.8756         | 1651.7598      | 826.3836         | Q    | 1720.8613 | 860.9343        | 1703.8347      | 852.4210         | 1702.8507      | 851.9290         | 10 |
| 16 | 1798.8130 | 899.9101        | 1781.7865      | 891.3969         | 1780.8024      | 890.9049         | E    | 1592.8027 | 796.9050        | 1575.7762      | 788.3917         | 1574.7921      | 787.8997         | 9  |
| 17 | 1911.8971 | 956.4522        | 1894.8705      | 947.9389         | 1893.8865      | 947.4469         | L    | 1463.7601 | 732.3837        | 1446.7336      | 723.8704         | 1445.7496      | 723.3784         | 8  |
| 18 | 2497.1841 | 1249.0957       | 2480.1576      | 1240.5824        | 2479.1736      | 1240.0904        | K    | 1350.6761 | 675.8417        | 1333.6495      | 667.3284         | 1332.6655      | 666.8364         | 7  |
| 19 | 2644.2526 | 1322.6299       | 2627.2260      | 1314.1166        | 2626.2420      | 1313.6246        | F    | 765.3890  | 383.1981        | 748.3624       | 374.6849         | 747.3784       | 374.1928         | 6  |
| 20 | 2731.2846 | 1366.1459       | 2714.2580      | 1357.6327        | 2713.2740      | 1357.1406        | S    | 618.3206  | 309.6639        | 601.2940       | 301.1506         | 600.3100       | 300.6586         | 5  |
| 21 | 2830.3530 | 1415.6801       | 2813.3264      | 1407.1669        | 2812.3424      | 1406.6749        | V    | 531.2885  | 266.1479        | 514.2620       | 257.6346         | 513.2780       | 257.1426         | 4  |
| 22 | 2959.3956 | 1480.2014       | 2942.3690      | 1471.6882        | 2941.3850      | 1471.1961        | E    | 432.2201  | 216.6137        | 415.1936       | 208.1004         | 414.2096       | 207.6084         | 3  |
| 23 | 3087.4542 | 1544.2307       | 3070.4276      | 1535.7174        | 3069.4436      | 1535.2254        | Q    | 303.1775  | 152.0924        | 286.1510       | 143.5791         |                |                  | 2  |
| 24 |           |                 |                |                  |                |                  | R    | 175.1190  | 88.0631         | 158.0924       | 79.5498          |                |                  | 1  |

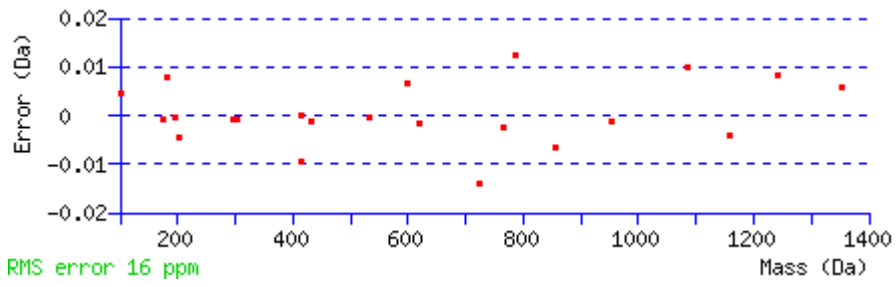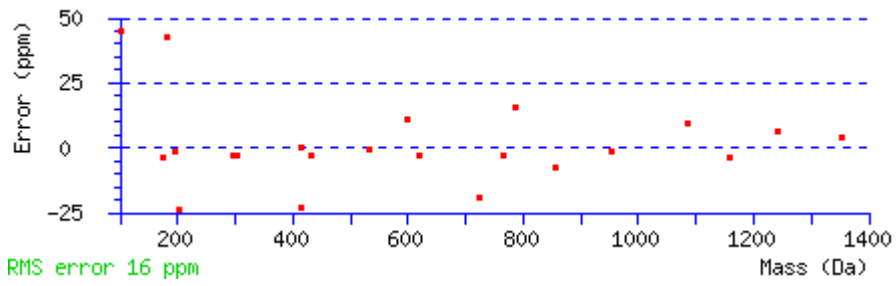



IDENTIFICATION 14

MS/MS Fragmentation of **MEVAVPVKQEA EGLALDSPWHR**

Found in **Q8N0Y2**, Zinc finger protein 444 OS=Homo sapiens GN=ZNF444 PE=1 SV=1

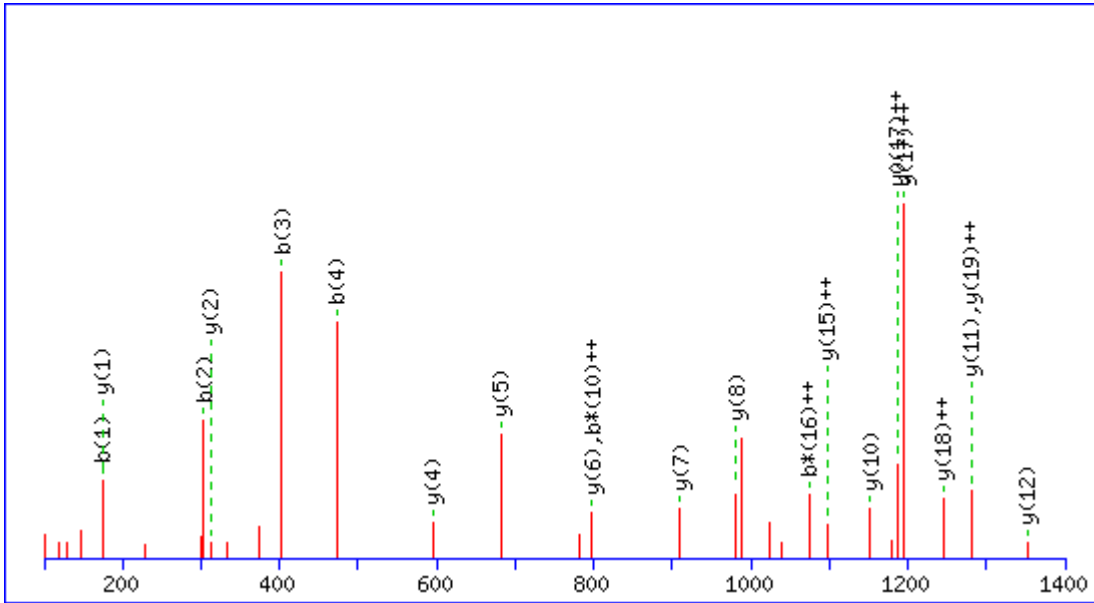

Monoisotopic mass of neutral peptide Mr(calc): 2960.4450

Variable modifications:

N-term : Acetyl (N-term)

K8 : Sumo 3 (K)

Ions Score: 61 Expect: 0.0026

| #  | b         | b <sup>++</sup> | b <sup>*</sup> | b <sup>+++</sup> | b <sup>0</sup> | b <sub>0++</sub> | Seq. | y         | y <sup>++</sup> | y <sup>*</sup> | y <sup>+++</sup> | y <sup>0</sup> | y <sup>0++</sup> | #  |
|----|-----------|-----------------|----------------|------------------|----------------|------------------|------|-----------|-----------------|----------------|------------------|----------------|------------------|----|
| 1  | 174.0583  | 87.5328         |                |                  |                |                  | M    |           |                 |                |                  |                |                  | 22 |
| 2  | 303.1009  | 152.0541        |                |                  | 285.0904       | 143.0488         | E    | 2788.4013 | 1394.7043       | 2771.3747      | 1386.1910        | 2770.3907      | 1385.6990        | 21 |
| 3  | 402.1693  | 201.5883        |                |                  | 384.1588       | 192.5830         | V    | 2659.3587 | 1330.1830       | 2642.3321      | 1321.6697        | 2641.3481      | 1321.1777        | 20 |
| 4  | 473.2064  | 237.1069        |                |                  | 455.1959       | 228.1016         | A    | 2560.2903 | 1280.6488       | 2543.2637      | 1272.1355        | 2542.2797      | 1271.6435        | 19 |
| 5  | 572.2749  | 286.6411        |                |                  | 554.2643       | 277.6358         | V    | 2489.2532 | 1245.1302       | 2472.2266      | 1236.6169        | 2471.2426      | 1236.1249        | 18 |
| 6  | 669.3276  | 335.1675        |                |                  | 651.3171       | 326.1622         | P    | 2390.1847 | 1195.5960       | 2373.1582      | 1187.0827        | 2372.1742      | 1186.5907        | 17 |
| 7  | 768.3960  | 384.7017        |                |                  | 750.3855       | 375.6964         | V    | 2293.1320 | 1147.0696       | 2276.1054      | 1138.5564        | 2275.1214      | 1138.0643        | 16 |
| 8  | 1353.6831 | 677.3452        | 1336.6566      | 668.8319         | 1335.6725      | 668.3399         | K    | 2194.0636 | 1097.5354       | 2177.0370      | 1089.0221        | 2176.0530      | 1088.5301        | 15 |
| 9  | 1481.7417 | 741.3745        | 1464.7151      | 732.8612         | 1463.7311      | 732.3692         | Q    | 1608.7765 | 804.8919        | 1591.7499      | 796.3786         | 1590.7659      | 795.8866         | 14 |
| 10 | 1610.7843 | 805.8958        | 1593.7577      | 797.3825         | 1592.7737      | 796.8905         | E    | 1480.7179 | 740.8626        | 1463.6914      | 732.3493         | 1462.7074      | 731.8573         | 13 |
| 11 | 1681.8214 | 841.4143        | 1664.7948      | 832.9011         | 1663.8108      | 832.4091         | A    | 1351.6753 | 676.3413        | 1334.6488      | 667.8280         | 1333.6648      | 667.3360         | 12 |
| 12 | 1810.8640 | 905.9356        | 1793.8374      | 897.4224         | 1792.8534      | 896.9304         | E    | 1280.6382 | 640.8227        | 1263.6117      | 632.3095         | 1262.6276      | 631.8175         | 11 |
| 13 | 1867.8855 | 934.4464        | 1850.8589      | 925.9331         | 1849.8749      | 925.4411         | G    | 1151.5956 | 576.3014        | 1134.5691      | 567.7882         | 1133.5851      | 567.2962         | 10 |
| 14 | 1980.9695 | 990.9884        | 1963.9430      | 982.4751         | 1962.9590      | 981.9831         | L    | 1094.5742 | 547.7907        | 1077.5476      | 539.2774         | 1076.5636      | 538.7854         | 9  |
| 15 | 2052.0066 | 1026.5070       | 2034.9801      | 1017.9937        | 2033.9961      | 1017.5017        | A    | 981.4901  | 491.2487        | 964.4635       | 482.7354         | 963.4795       | 482.2434         | 8  |
| 16 | 2165.0907 | 1083.0490       | 2148.0641      | 1074.5357        | 2147.0801      | 1074.0437        | L    | 910.4530  | 455.7301        | 893.4264       | 447.2169         | 892.4424       | 446.7248         | 7  |
| 17 | 2280.1176 | 1140.5625       | 2263.0911      | 1132.0492        | 2262.1071      | 1131.5572        | D    | 797.3689  | 399.1881        | 780.3424       | 390.6748         | 779.3583       | 390.1828         | 6  |
| 18 | 2367.1497 | 1184.0785       | 2350.1231      | 1175.5652        | 2349.1391      | 1175.0732        | S    | 682.3420  | 341.6746        | 665.3154       | 333.1613         | 664.3314       | 332.6693         | 5  |
| 19 | 2464.2024 | 1232.6049       | 2447.1759      | 1224.0916        | 2446.1919      | 1223.5996        | P    | 595.3099  | 298.1586        | 578.2834       | 289.6453         |                |                  | 4  |
| 20 | 2650.2817 | 1325.6445       | 2633.2552      | 1317.1312        | 2632.2712      | 1316.6392        | W    | 498.2572  | 249.6322        | 481.2306       | 241.1190         |                |                  | 3  |
| 21 | 2787.3407 | 1394.1740       | 2770.3141      | 1385.6607        | 2769.3301      | 1385.1687        | H    | 312.1779  | 156.5926        | 295.1513       | 148.0793         |                |                  | 2  |
| 22 |           |                 |                |                  |                |                  | R    | 175.1190  | 88.0631         | 158.0924       | 79.5498          |                |                  | 1  |

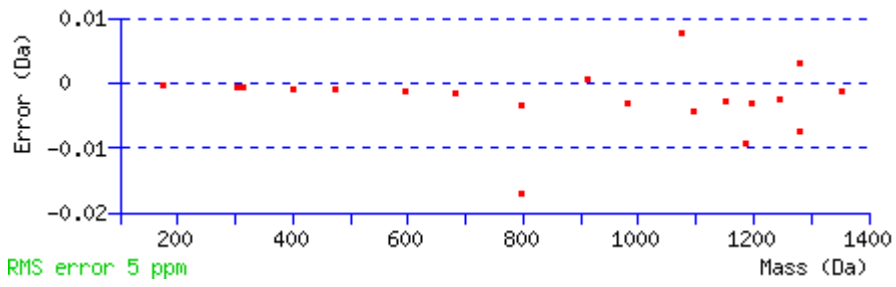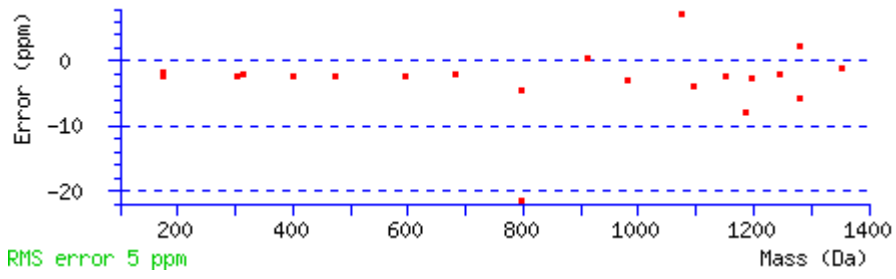

IDENTIFICATION 15

MS/MS Fragmentation of **QLPGVKSE GK**

Found in **P09874**, Poly [ADP-ribose] polymerase 1 OS=Homo sapiens GN=PARP1 PE=1 SV=4

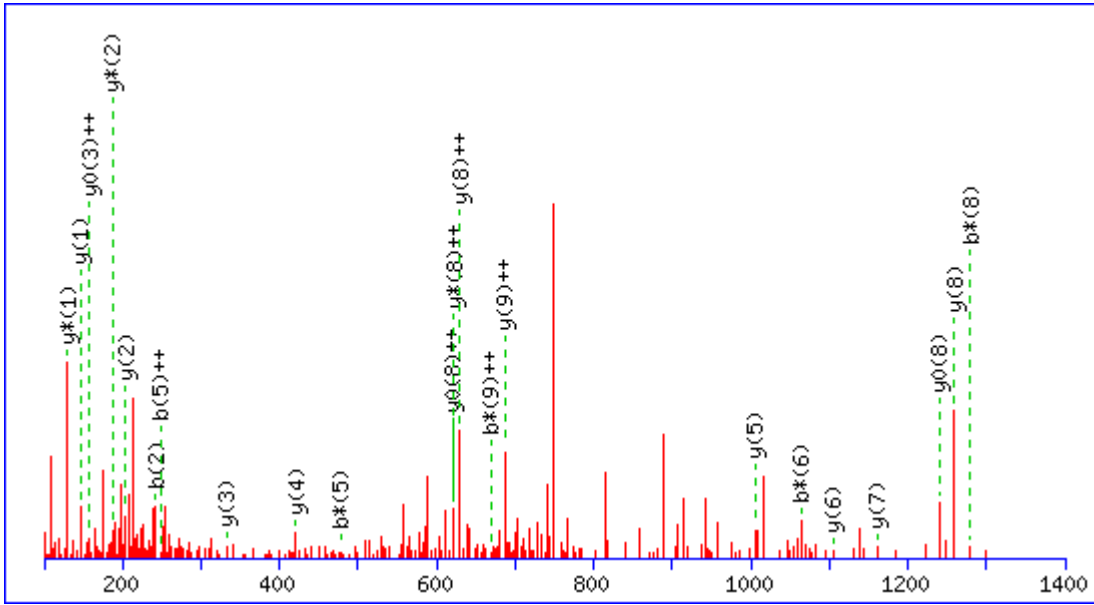

Monoisotopic mass of neutral peptide  $M_r(\text{calc})$ : 1498.7740

Variable modifications:

K6 : Sumo 3 (K)

Ions Score: 15 Expect: 26

| #  | b         | b <sup>++</sup> | b <sup>*</sup> | b <sup>+++</sup> | b <sup>0</sup> | b <sup>0++</sup> | Seq. | y         | y <sup>++</sup> | y <sup>*</sup> | y <sup>+++</sup> | y <sup>0</sup> | y <sup>0++</sup> | #  |
|----|-----------|-----------------|----------------|------------------|----------------|------------------|------|-----------|-----------------|----------------|------------------|----------------|------------------|----|
| 1  | 129.0659  | 65.0366         | 112.0393       | 56.5233          |                |                  | Q    |           |                 |                |                  |                |                  | 10 |
| 2  | 242.1499  | 121.5786        | 225.1234       | 113.0653         |                |                  | L    | 1371.7227 | 686.3650        | 1354.6961      | 677.8517         | 1353.7121      | 677.3597         | 9  |
| 3  | 339.2027  | 170.1050        | 322.1761       | 161.5917         |                |                  | P    | 1258.6386 | 629.8229        | 1241.6121      | 621.3097         | 1240.6280      | 620.8177         | 8  |
| 4  | 396.2241  | 198.6157        | 379.1976       | 190.1024         |                |                  | G    | 1161.5858 | 581.2966        | 1144.5593      | 572.7833         | 1143.5753      | 572.2913         | 7  |
| 5  | 495.2926  | 248.1499        | 478.2660       | 239.6366         |                |                  | V    | 1104.5644 | 552.7858        | 1087.5378      | 544.2726         | 1086.5538      | 543.7805         | 6  |
| 6  | 1080.5796 | 540.7935        | 1063.5531      | 532.2802         |                |                  | K    | 1005.4960 | 503.2516        | 988.4694       | 494.7383         | 987.4854       | 494.2463         | 5  |
| 7  | 1167.6117 | 584.3095        | 1150.5851      | 575.7962         | 1149.6011      | 575.3042         | S    | 420.2089  | 210.6081        | 403.1823       | 202.0948         | 402.1983       | 201.6028         | 4  |
| 8  | 1296.6543 | 648.8308        | 1279.6277      | 640.3175         | 1278.6437      | 639.8255         | E    | 333.1769  | 167.0921        | 316.1503       | 158.5788         | 315.1663       | 158.0868         | 3  |
| 9  | 1353.6757 | 677.3415        | 1336.6492      | 668.8282         | 1335.6652      | 668.3362         | G    | 204.1343  | 102.5708        | 187.1077       | 94.0575          |                |                  | 2  |
| 10 |           |                 |                |                  |                |                  | K    | 147.1128  | 74.0600         | 130.0863       | 65.5468          |                |                  | 1  |

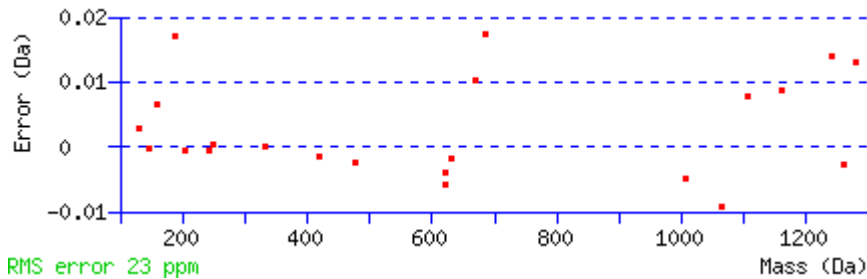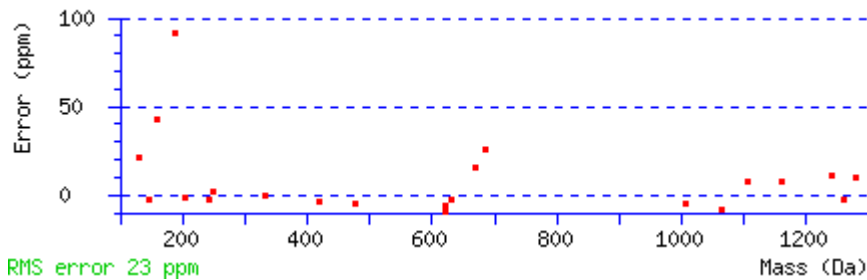

MS/MS Fragmentation of **RPKEEWDPEYTPK**Found in **Q9NYF8**, Bcl-2-associated transcription factor 1 OS=Homo sapiens GN=BCLAF1 PE=1 SV=2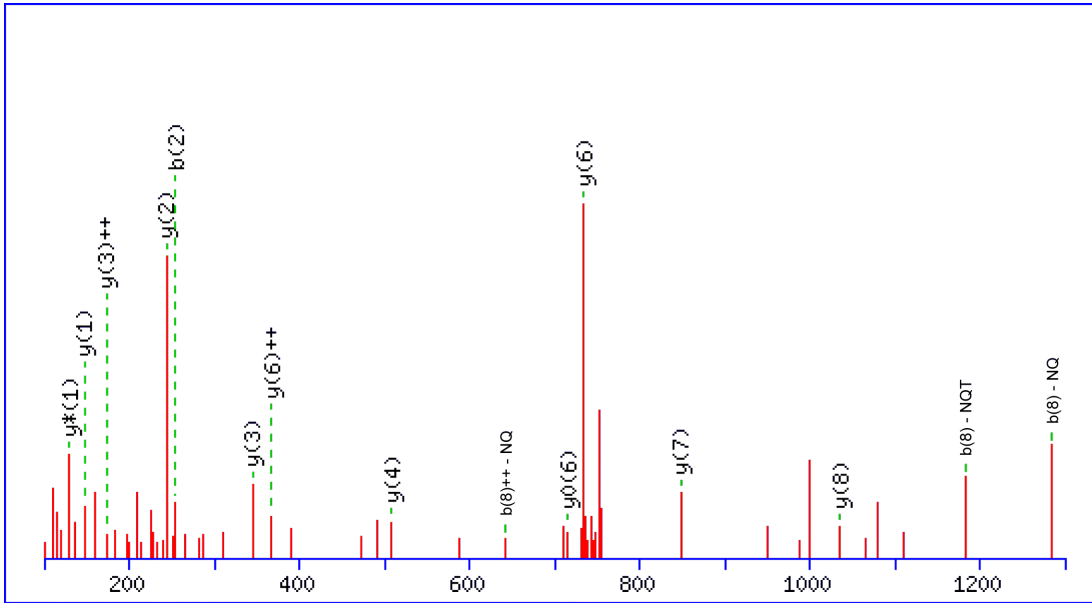

Monoisotopic mass of neutral peptide Mr(calc): 2260.0396

Variable modifications:

K3 : Sumo 3 (K)

Ions Score: 20 Expect: 38

| #  | b         | b <sup>++</sup> | b <sup>*</sup> | b <sup>+++</sup> | b <sup>0</sup> | b <sup>0++</sup> | Seq. | y         | y <sup>++</sup> | y <sup>*</sup> | y <sup>+++</sup> | y <sup>0</sup> | y <sup>0++</sup> | #  |
|----|-----------|-----------------|----------------|------------------|----------------|------------------|------|-----------|-----------------|----------------|------------------|----------------|------------------|----|
| 1  | 157.1084  | 79.0578         | 140.0818       | 70.5446          |                |                  | R    |           |                 |                |                  |                |                  | 14 |
| 2  | 254.1612  | 127.5842        | 237.1346       | 119.0709         |                |                  | P    | 2104.9458 | 1052.9765       | 2087.9193      | 1044.4633        | 2086.9352      | 1043.9713        | 13 |
| 3  | 839.4482  | 420.2278        | 822.4217       | 411.7145         |                |                  | K    | 2007.8930 | 1004.4502       | 1990.8665      | 995.9369         | 1989.8825      | 995.4449         | 12 |
| 4  | 968.4908  | 484.7490        | 951.4643       | 476.2358         | 950.4803       | 475.7438         | E    | 1422.6060 | 711.8066        | 1405.5794      | 703.2933         | 1404.5954      | 702.8013         | 11 |
| 5  | 1097.5334 | 549.2703        | 1080.5069      | 540.7571         | 1079.5228      | 540.2651         | E    | 1293.5634 | 647.2853        | 1276.5368      | 638.7721         | 1275.5528      | 638.2800         | 10 |
| 6  | 1226.5760 | 613.7916        | 1209.5495      | 605.2784         | 1208.5654      | 604.7864         | E    | 1164.5208 | 582.7640        | 1147.4942      | 574.2508         | 1146.5102      | 573.7587         | 9  |
| 7  | 1412.6553 | 706.8313        | 1395.6288      | 698.3180         | 1394.6448      | 697.8260         | W    | 1035.4782 | 518.2427        | 1018.4516      | 509.7295         | 1017.4676      | 509.2375         | 8  |
| 8  | 1527.6823 | 764.3448        | 1510.6557      | 755.8315         | 1509.6717      | 755.3395         | D    | 849.3989  | 425.2031        | 832.3723       | 416.6898         | 831.3883       | 416.1978         | 7  |
| 9  | 1624.7350 | 812.8712        | 1607.7085      | 804.3579         | 1606.7245      | 803.8659         | P    | 734.3719  | 367.6896        | 717.3454       | 359.1763         | 716.3614       | 358.6843         | 6  |
| 10 | 1753.7776 | 877.3924        | 1736.7511      | 868.8792         | 1735.7671      | 868.3872         | E    | 637.3192  | 319.1632        | 620.2926       | 310.6499         | 619.3086       | 310.1579         | 5  |
| 11 | 1916.8409 | 958.9241        | 1899.8144      | 950.4108         | 1898.8304      | 949.9188         | Y    | 508.2766  | 254.6419        | 491.2500       | 246.1287         | 490.2660       | 245.6366         | 4  |
| 12 | 2017.8886 | 1009.4480       | 2000.8621      | 1000.9347        | 1999.8781      | 1000.4427        | T    | 345.2132  | 173.1103        | 328.1867       | 164.5970         | 327.2027       | 164.1050         | 3  |
| 13 | 2114.9414 | 1057.9743       | 2097.9148      | 1049.4611        | 2096.9308      | 1048.9690        | P    | 244.1656  | 122.5864        | 227.1390       | 114.0731         |                |                  | 2  |
| 14 |           |                 |                |                  |                |                  | K    | 147.1128  | 74.0600         | 130.0863       | 65.5468          |                |                  | 1  |

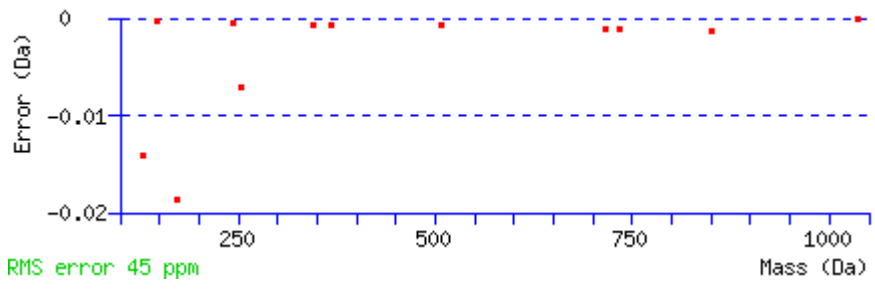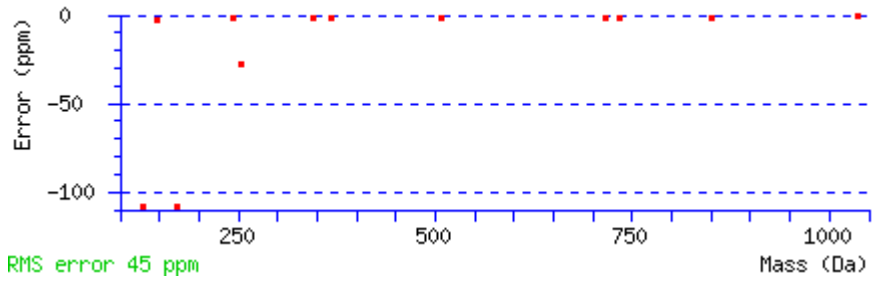

IDENTIFICATION 17

MS/MS Fragmentation of **SASELTAGAEAEAEVKTGK**

Found in **Q9H0U9**, Testis-specific Y-encoded-like protein 1 OS=Homo sapiens GN=TSPYL1 PE=1 SV=3

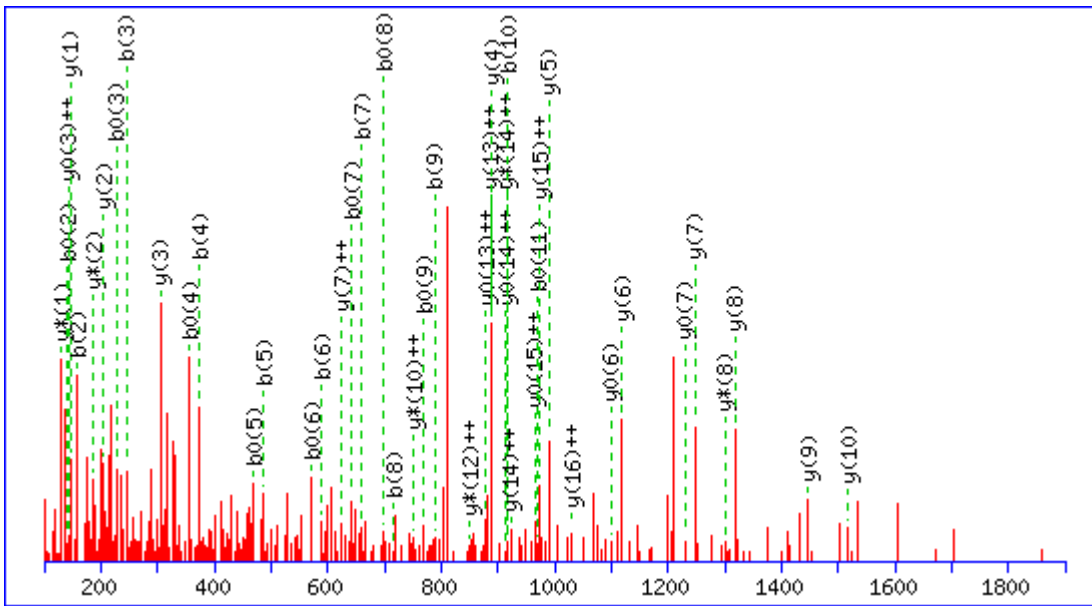

Monoisotopic mass of neutral peptide  $M_r(\text{calc})$ : 2434.1459

Variable modifications:

K17 : Sumo 3 (K)

Ions Score: 38 Expect: 0.57

| #  | b         | b <sup>++</sup> | b <sup>*</sup> | b <sup>+++</sup> | b <sup>0</sup> | b <sup>0++</sup> | Seq. | y         | y <sup>++</sup> | y <sup>*</sup> | y <sup>+++</sup> | y <sup>0</sup> | y <sup>0++</sup> | #  |
|----|-----------|-----------------|----------------|------------------|----------------|------------------|------|-----------|-----------------|----------------|------------------|----------------|------------------|----|
| 1  | 88.0393   | 44.5233         |                |                  | 70.0287        | 35.5180          | S    |           |                 |                |                  |                |                  | 20 |
| 2  | 159.0764  | 80.0418         |                |                  | 141.0659       | 71.0366          | A    | 2348.1212 | 1174.5642       | 2331.0947      | 1166.0510        | 2330.1106      | 1165.5590        | 19 |
| 3  | 246.1084  | 123.5579        |                |                  | 228.0979       | 114.5526         | S    | 2277.0841 | 1139.0457       | 2260.0575      | 1130.5324        | 2259.0735      | 1130.0404        | 18 |
| 4  | 375.1510  | 188.0792        |                |                  | 357.1405       | 179.0739         | E    | 2190.0521 | 1095.5297       | 2173.0255      | 1087.0164        | 2172.0415      | 1086.5244        | 17 |
| 5  | 488.2351  | 244.6212        |                |                  | 470.2245       | 235.6159         | L    | 2061.0095 | 1031.0084       | 2043.9829      | 1022.4951        | 2042.9989      | 1022.0031        | 16 |
| 6  | 589.2828  | 295.1450        |                |                  | 571.2722       | 286.1397         | T    | 1947.9254 | 974.4663        | 1930.8989      | 965.9531         | 1929.9148      | 965.4611         | 15 |
| 7  | 660.3199  | 330.6636        |                |                  | 642.3093       | 321.6583         | A    | 1846.8777 | 923.9425        | 1829.8512      | 915.4292         | 1828.8672      | 914.9372         | 14 |
| 8  | 717.3414  | 359.1743        |                |                  | 699.3308       | 350.1690         | G    | 1775.8406 | 888.4239        | 1758.8141      | 879.9107         | 1757.8300      | 879.4187         | 13 |
| 9  | 788.3785  | 394.6929        |                |                  | 770.3679       | 385.6876         | A    | 1718.8191 | 859.9132        | 1701.7926      | 851.3999         | 1700.8086      | 850.9079         | 12 |
| 10 | 917.4211  | 459.2142        |                |                  | 899.4105       | 450.2089         | E    | 1647.7820 | 824.3947        | 1630.7555      | 815.8814         | 1629.7715      | 815.3894         | 11 |
| 11 | 988.4582  | 494.7327        |                |                  | 970.4476       | 485.7274         | A    | 1518.7394 | 759.8734        | 1501.7129      | 751.3601         | 1500.7289      | 750.8681         | 10 |
| 12 | 1117.5008 | 559.2540        |                |                  | 1099.4902      | 550.2487         | E    | 1447.7023 | 724.3548        | 1430.6758      | 715.8415         | 1429.6918      | 715.3495         | 9  |
| 13 | 1188.5379 | 594.7726        |                |                  | 1170.5273      | 585.7673         | A    | 1318.6597 | 659.8335        | 1301.6332      | 651.3202         | 1300.6492      | 650.8282         | 8  |
| 14 | 1317.5805 | 659.2939        |                |                  | 1299.5699      | 650.2886         | E    | 1247.6226 | 624.3149        | 1230.5961      | 615.8017         | 1229.6121      | 615.3097         | 7  |
| 15 | 1446.6231 | 723.8152        |                |                  | 1428.6125      | 714.8099         | E    | 1118.5800 | 559.7937        | 1101.5535      | 551.2804         | 1100.5695      | 550.7884         | 6  |
| 16 | 1545.6915 | 773.3494        |                |                  | 1527.6809      | 764.3441         | V    | 989.5374  | 495.2724        | 972.5109       | 486.7591         | 971.5269       | 486.2671         | 5  |
| 17 | 2130.9786 | 1065.9929       | 2113.9520      | 1057.4796        | 2112.9680      | 1056.9876        | K    | 890.4690  | 445.7381        | 873.4425       | 437.2249         | 872.4585       | 436.7329         | 4  |
| 18 | 2232.0262 | 1116.5168       | 2214.9997      | 1108.0035        | 2214.0157      | 1107.5115        | T    | 305.1819  | 153.0946        | 288.1554       | 144.5813         | 287.1714       | 144.0893         | 3  |
| 19 | 2289.0477 | 1145.0275       | 2272.0212      | 1136.5142        | 2271.0371      | 1136.0222        | G    | 204.1343  | 102.5708        | 187.1077       | 94.0575          |                |                  | 2  |
| 20 |           |                 |                |                  |                |                  | K    | 147.1128  | 74.0600         | 130.0863       | 65.5468          |                |                  | 1  |

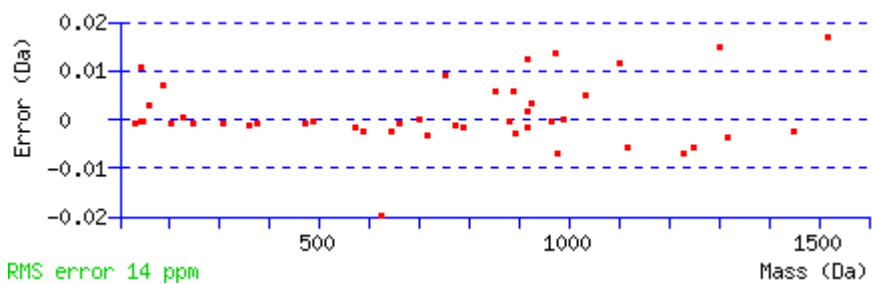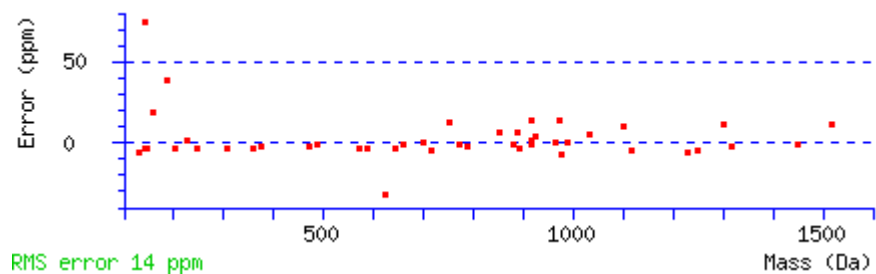

IDENTIFICATION 18

MS/MS Fragmentation of **SDQEAKPSTEDLGDKKEGEYIK**

Found in **P63165**, Small ubiquitin-related modifier 1 OS=Homo sapiens GN=SUMO1 PE=1 SV=1

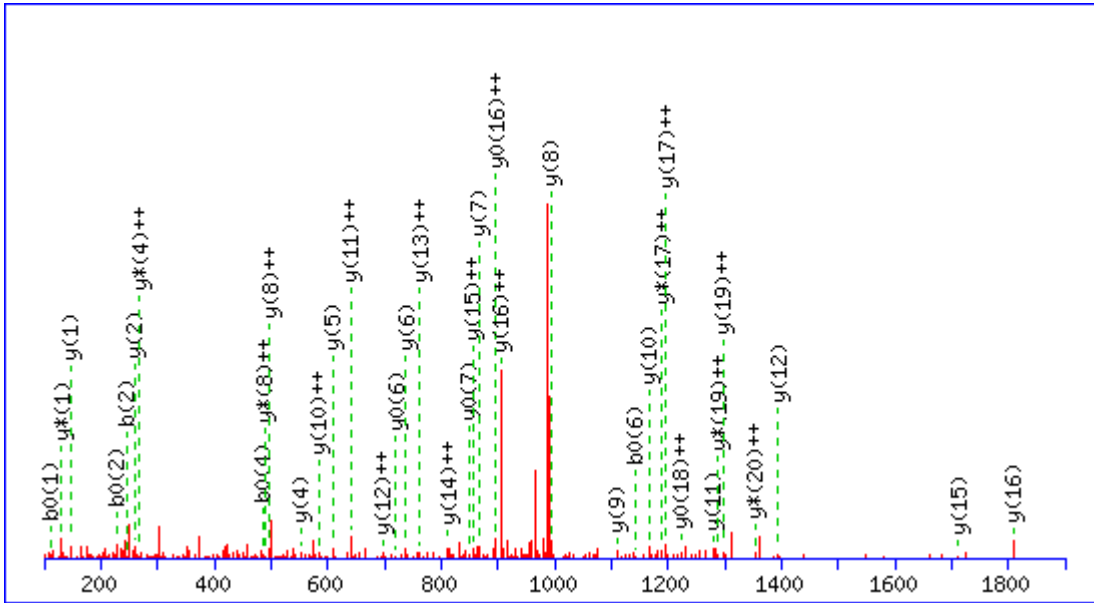

Monoisotopic mass of neutral peptide Mr(calc): 2966.3628

Variable modifications:

N-term : Acetyl (N-term)

Q3 : Deamidated (NQ)

K6 : Sumo 3 (K)

Ions Score: 22 Expect: 35

| #  | b         | b <sup>++</sup> | b <sup>*</sup> | b <sup>+++</sup> | b <sup>0</sup> | b <sup>0++</sup> | Seq. | y         | y <sup>++</sup> | y <sup>*</sup> | y <sup>+++</sup> | y <sup>0</sup> | y <sup>0++</sup> | #  |
|----|-----------|-----------------|----------------|------------------|----------------|------------------|------|-----------|-----------------|----------------|------------------|----------------|------------------|----|
| 1  | 130.0499  | 65.5286         |                |                  | 112.0393       | 56.5233          | S    |           |                 |                |                  |                |                  | 22 |
| 2  | 245.0768  | 123.0420        |                |                  | 227.0662       | 114.0368         | D    | 2838.3276 | 1419.6674       | 2821.3010      | 1411.1541        | 2820.3170      | 1410.6621        | 21 |
| 3  | 374.1194  | 187.5633        | 357.0929       | 179.0501         | 356.1088       | 178.5581         | Q    | 2723.3006 | 1362.1540       | 2706.2741      | 1353.6407        | 2705.2901      | 1353.1487        | 20 |
| 4  | 503.1620  | 252.0846        | 486.1354       | 243.5714         | 485.1514       | 243.0794         | E    | 2594.2580 | 1297.6327       | 2577.2315      | 1289.1194        | 2576.2475      | 1288.6274        | 19 |
| 5  | 574.1991  | 287.6032        | 557.1726       | 279.0899         | 556.1885       | 278.5979         | A    | 2465.2154 | 1233.1114       | 2448.1889      | 1224.5981        | 2447.2049      | 1224.1061        | 18 |
| 6  | 1159.4862 | 580.2467        | 1142.4596      | 571.7335         | 1141.4756      | 571.2414         | K    | 2394.1783 | 1197.5928       | 2377.1518      | 1189.0795        | 2376.1678      | 1188.5875        | 17 |
| 7  | 1256.5390 | 628.7731        | 1239.5124      | 620.2598         | 1238.5284      | 619.7678         | P    | 1808.8913 | 904.9493        | 1791.8647      | 896.4360         | 1790.8807      | 895.9440         | 16 |
| 8  | 1343.5710 | 672.2891        | 1326.5444      | 663.7759         | 1325.5604      | 663.2838         | S    | 1711.8385 | 856.4229        | 1694.8119      | 847.9096         | 1693.8279      | 847.4176         | 15 |
| 9  | 1444.6187 | 722.8130        | 1427.5921      | 714.2997         | 1426.6081      | 713.8077         | T    | 1624.8065 | 812.9069        | 1607.7799      | 804.3936         | 1606.7959      | 803.9016         | 14 |
| 10 | 1573.6613 | 787.3343        | 1556.6347      | 778.8210         | 1555.6507      | 778.3290         | E    | 1523.7588 | 762.3830        | 1506.7322      | 753.8698         | 1505.7482      | 753.3777         | 13 |
| 11 | 1688.6882 | 844.8477        | 1671.6616      | 836.3345         | 1670.6776      | 835.8425         | D    | 1394.7162 | 697.8617        | 1377.6896      | 689.3485         | 1376.7056      | 688.8564         | 12 |
| 12 | 1801.7723 | 901.3898        | 1784.7457      | 892.8765         | 1783.7617      | 892.3845         | L    | 1279.6892 | 640.3483        | 1262.6627      | 631.8350         | 1261.6787      | 631.3430         | 11 |
| 13 | 1858.7937 | 929.9005        | 1841.7672      | 921.3872         | 1840.7832      | 920.8952         | G    | 1166.6052 | 583.8062        | 1149.5786      | 575.2930         | 1148.5946      | 574.8009         | 10 |
| 14 | 1973.8207 | 987.4140        | 1956.7941      | 978.9007         | 1955.8101      | 978.4087         | D    | 1109.5837 | 555.2955        | 1092.5572      | 546.7822         | 1091.5732      | 546.2902         | 9  |
| 15 | 2101.9156 | 1051.4615       | 2084.8891      | 1042.9482        | 2083.9051      | 1042.4562        | K    | 994.5568  | 497.7820        | 977.5302       | 489.2688         | 976.5462       | 488.7767         | 8  |
| 16 | 2230.0106 | 1115.5089       | 2212.9840      | 1106.9957        | 2212.0000      | 1106.5037        | K    | 866.4618  | 433.7345        | 849.4353       | 425.2213         | 848.4512       | 424.7293         | 7  |
| 17 | 2359.0532 | 1180.0302       | 2342.0266      | 1171.5170        | 2341.0426      | 1171.0249        | E    | 738.3668  | 369.6871        | 721.3403       | 361.1738         | 720.3563       | 360.6818         | 6  |
| 18 | 2416.0746 | 1208.5410       | 2399.0481      | 1200.0277        | 2398.0641      | 1199.5357        | G    | 609.3243  | 305.1658        | 592.2977       | 296.6525         | 591.3137       | 296.1605         | 5  |
| 19 | 2545.1172 | 1273.0623       | 2528.0907      | 1264.5490        | 2527.1067      | 1264.0570        | E    | 552.3028  | 276.6550        | 535.2762       | 268.1418         | 534.2922       | 267.6498         | 4  |
| 20 | 2708.1806 | 1354.5939       | 2691.1540      | 1346.0806        | 2690.1700      | 1345.5886        | Y    | 423.2602  | 212.1337        | 406.2336       | 203.6205         |                |                  | 3  |
| 21 | 2821.2646 | 1411.1360       | 2804.2381      | 1402.6227        | 2803.2541      | 1402.1307        | I    | 260.1969  | 130.6021        | 243.1703       | 122.0888         |                |                  | 2  |
| 22 |           |                 |                |                  |                |                  | K    | 147.1128  | 74.0600         | 130.0863       | 65.5468          |                |                  | 1  |



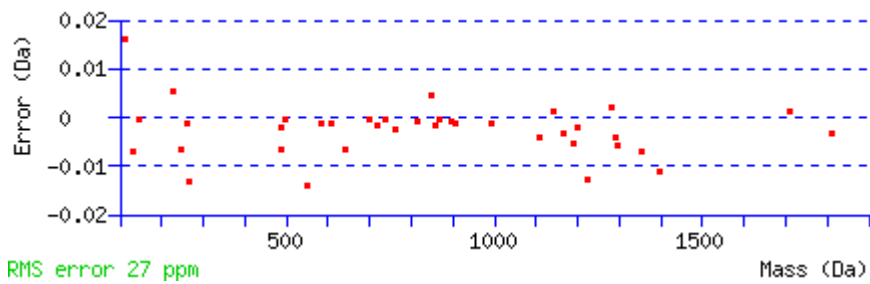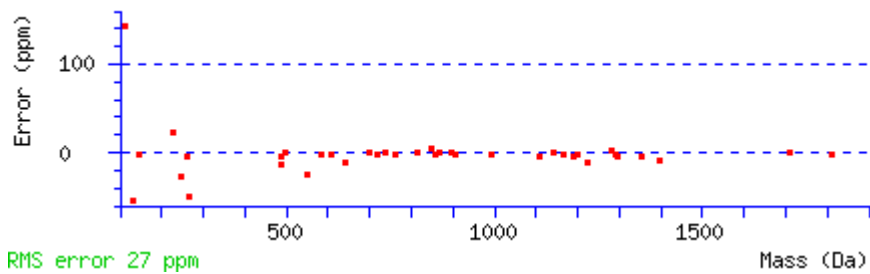

IDENTIFICATION 19

MS/MS Fragmentation of **SNQNGKDSKPSSTPR**

Found in **P06748**, Nucleophosmin OS=Homo sapiens GN=NPM1 PE=1 SV=2

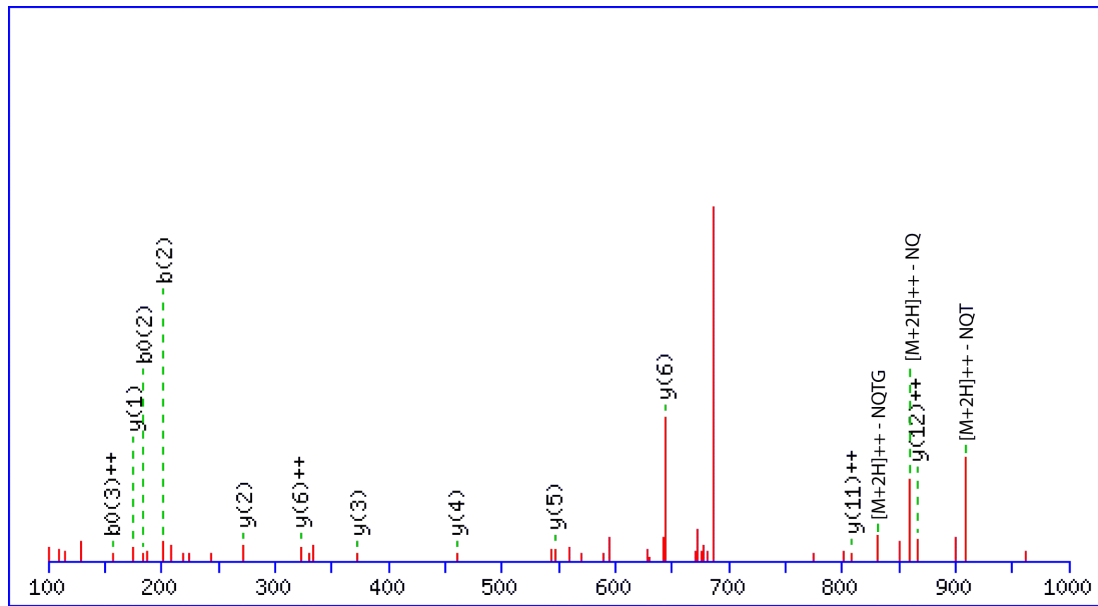

Monoisotopic mass of neutral peptide Mr(calc): 2060.9359 Variable modifications: Q3 : Deamidated (NQ) N4 : Deamidated (NQ) K9 : Sumo 3 (K) Ions Score: 14 Expect: 1.1e+02

| #  | b               | b <sup>++</sup> | b <sup>*</sup> | b <sup>+++</sup> | b <sup>0</sup>  | b <sup>0++</sup> | Seq. | y               | y <sup>++</sup> | y <sup>*</sup> | y <sup>+++</sup> | y <sup>0</sup> | y <sup>0++</sup> | #  |
|----|-----------------|-----------------|----------------|------------------|-----------------|------------------|------|-----------------|-----------------|----------------|------------------|----------------|------------------|----|
| 1  | 88.0393         | 44.5233         |                |                  | 70.0287         | 35.5180          | S    |                 |                 |                |                  |                |                  | 15 |
| 2  | <b>202.0822</b> | 101.5448        | 185.0557       | 93.0315          | <b>184.0717</b> | 92.5395          | N    | 1974.9112       | 987.9592        | 1957.8846      | 979.4459         | 1956.9006      | 978.9539         | 14 |
| 3  | 331.1248        | 166.0661        | 314.0983       | 157.5528         | 313.1143        | <b>157.0608</b>  | Q    | 1860.8682       | 930.9378        | 1843.8417      | 922.4245         | 1842.8577      | 921.9325         | 13 |
| 4  | 446.1518        | 223.5795        | 429.1252       | 215.0662         | 428.1412        | 214.5742         | N    | 1731.8256       | <b>866.4165</b> | 1714.7991      | 857.9032         | 1713.8151      | 857.4112         | 12 |
| 5  | 503.1732        | 252.0903        | 486.1467       | 243.5770         | 485.1627        | 243.0850         | G    | 1616.7987       | <b>808.9030</b> | 1599.7721      | 800.3897         | 1598.7881      | 799.8977         | 11 |
| 6  | 631.2682        | 316.1377        | 614.2416       | 307.6245         | 613.2576        | 307.1325         | K    | 1559.7772       | 780.3922        | 1542.7507      | 771.8790         | 1541.7667      | 771.3870         | 10 |
| 7  | 746.2951        | 373.6512        | 729.2686       | 365.1379         | 728.2846        | 364.6459         | D    | 1431.6823       | 716.3448        | 1414.6557      | 707.8315         | 1413.6717      | 707.3395         | 9  |
| 8  | 833.3272        | 417.1672        | 816.3006       | 408.6539         | 815.3166        | 408.1619         | S    | 1316.6553       | 658.8313        | 1299.6288      | 650.3180         | 1298.6448      | 649.8260         | 8  |
| 9  | 1418.6142       | 709.8108        | 1401.5877      | 701.2975         | 1400.6037       | 700.8055         | K    | 1229.6233       | 615.3153        | 1212.5967      | 606.8020         | 1211.6127      | 606.3100         | 7  |
| 10 | 1515.6670       | 758.3371        | 1498.6405      | 749.8239         | 1497.6564       | 749.3319         | P    | <b>644.3362</b> | <b>322.6717</b> | 627.3097       | 314.1585         | 626.3257       | 313.6665         | 6  |
| 11 | 1602.6990       | 801.8532        | 1585.6725      | 793.3399         | 1584.6885       | 792.8479         | S    | <b>547.2835</b> | 274.1454        | 530.2569       | 265.6321         | 529.2729       | 265.1401         | 5  |
| 12 | 1689.7311       | 845.3692        | 1672.7045      | 836.8559         | 1671.7205       | 836.3639         | S    | <b>460.2514</b> | 230.6293        | 443.2249       | 222.1161         | 442.2409       | 221.6241         | 4  |
| 13 | 1790.7787       | 895.8930        | 1773.7522      | 887.3797         | 1772.7682       | 886.8877         | T    | <b>373.2194</b> | 187.1133        | 356.1928       | 178.6001         | 355.2088       | 178.1081         | 3  |
| 14 | 1887.8315       | 944.4194        | 1870.8050      | 935.9061         | 1869.8209       | 935.4141         | P    | <b>272.1717</b> | 136.5895        | 255.1452       | 128.0762         |                |                  | 2  |
| 15 |                 |                 |                |                  |                 |                  | R    | <b>175.1190</b> | 88.0631         | 158.0924       | 79.5498          |                |                  | 1  |

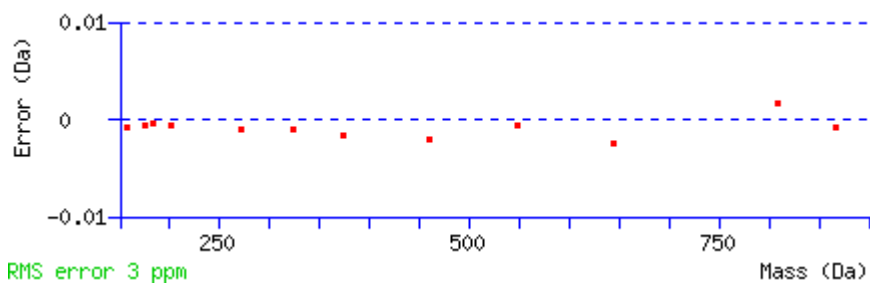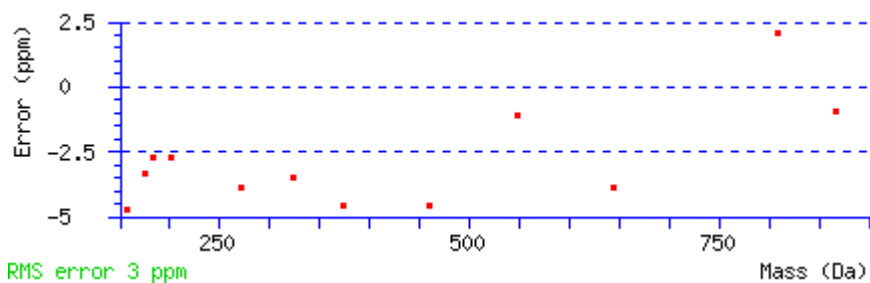

IDENTIFICATION 20

MS/MS Fragmentation of **TKIKADPDGPEAQAEACSGER**

Found in **Q9NX24**, H/AcA ribonucleoprotein complex subunit 2 OS=Homo sapiens GN=NHP2 PE=1 SV=1

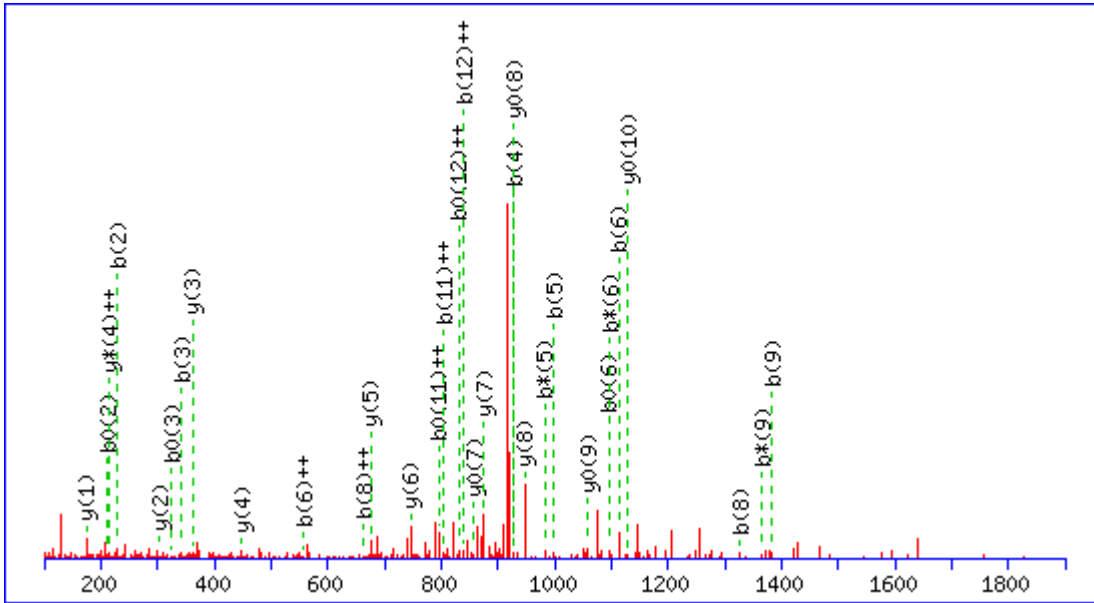

Monoisotopic mass of neutral peptide  $M_r(\text{calc})$ : 2755.2355

Variable modifications:

K4 : Sumo 3 (K)

Q13 : Deamidated (NQ)

C17 : Nethylmaleimide (C)

Ions Score: 6 Expect: 1.5e+03

| #  | b         | b <sup>++</sup> | b <sup>*</sup> | b <sup>+++</sup> | b <sup>0</sup> | b <sup>0++</sup> | Seq. | y         | y <sup>++</sup> | y <sup>*</sup> | y <sup>+++</sup> | y <sup>0</sup> | y <sup>0++</sup> | #  |
|----|-----------|-----------------|----------------|------------------|----------------|------------------|------|-----------|-----------------|----------------|------------------|----------------|------------------|----|
| 1  | 102.0550  | 51.5311         |                |                  | 84.0444        | 42.5258          | T    |           |                 |                |                  |                |                  | 21 |
| 2  | 230.1499  | 115.5786        | 213.1234       | 107.0653         | 212.1394       | 106.5733         | K    | 2655.1951 | 1328.1012       | 2638.1686      | 1319.5879        | 2637.1846      | 1319.0959        | 20 |
| 3  | 343.2340  | 172.1206        | 326.2074       | 163.6074         | 325.2234       | 163.1153         | I    | 2527.1002 | 1264.0537       | 2510.0736      | 1255.5404        | 2509.0896      | 1255.0484        | 19 |
| 4  | 928.5211  | 464.7642        | 911.4945       | 456.2509         | 910.5105       | 455.7589         | K    | 2414.0161 | 1207.5117       | 2396.9895      | 1198.9984        | 2396.0055      | 1198.5064        | 18 |
| 5  | 999.5582  | 500.2827        | 982.5316       | 491.7694         | 981.5476       | 491.2774         | A    | 1828.7290 | 914.8681        | 1811.7025      | 906.3549         | 1810.7185      | 905.8629         | 17 |
| 6  | 1114.5851 | 557.7962        | 1097.5586      | 549.2829         | 1096.5745      | 548.7909         | D    | 1757.6919 | 879.3496        | 1740.6654      | 870.8363         | 1739.6813      | 870.3443         | 16 |
| 7  | 1211.6379 | 606.3226        | 1194.6113      | 597.8093         | 1193.6273      | 597.3173         | P    | 1642.6650 | 821.8361        | 1625.6384      | 813.3228         | 1624.6544      | 812.8308         | 15 |
| 8  | 1326.6648 | 663.8360        | 1309.6383      | 655.3228         | 1308.6543      | 654.8308         | D    | 1545.6122 | 773.3097        | 1528.5856      | 764.7965         | 1527.6016      | 764.3045         | 14 |
| 9  | 1383.6863 | 692.3468        | 1366.6597      | 683.8335         | 1365.6757      | 683.3415         | G    | 1430.5853 | 715.7963        | 1413.5587      | 707.2830         | 1412.5747      | 706.7910         | 13 |
| 10 | 1480.7390 | 740.8732        | 1463.7125      | 732.3599         | 1462.7285      | 731.8679         | P    | 1373.5638 | 687.2855        | 1356.5372      | 678.7723         | 1355.5532      | 678.2802         | 12 |
| 11 | 1609.7816 | 805.3945        | 1592.7551      | 796.8812         | 1591.7711      | 796.3892         | E    | 1276.5110 | 638.7591        | 1259.4845      | 630.2459         | 1258.5005      | 629.7539         | 11 |
| 12 | 1680.8188 | 840.9130        | 1663.7922      | 832.3997         | 1662.8082      | 831.9077         | A    | 1147.4684 | 574.2379        | 1130.4419      | 565.7246         | 1129.4579      | 565.2326         | 10 |
| 13 | 1809.8613 | 905.4343        | 1792.8348      | 896.9210         | 1791.8508      | 896.4290         | Q    | 1076.4313 | 538.7193        | 1059.4048      | 530.2060         | 1058.4208      | 529.7140         | 9  |
| 14 | 1880.8985 | 940.9529        | 1863.8719      | 932.4396         | 1862.8879      | 931.9476         | A    | 947.3887  | 474.1980        | 930.3622       | 465.6847         | 929.3782       | 465.1927         | 8  |
| 15 | 2009.9411 | 1005.4742       | 1992.9145      | 996.9609         | 1991.9305      | 996.4689         | E    | 876.3516  | 438.6794        | 859.3251       | 430.1662         | 858.3410       | 429.6742         | 7  |
| 16 | 2080.9782 | 1040.9927       | 2063.9516      | 1032.4794        | 2062.9676      | 1031.9874        | A    | 747.3090  | 374.1581        | 730.2825       | 365.6449         | 729.2985       | 365.1529         | 6  |
| 17 | 2309.0350 | 1155.0212       | 2292.0085      | 1146.5079        | 2291.0245      | 1146.0159        | C    | 676.2719  | 338.6396        | 659.2454       | 330.1263         | 658.2613       | 329.6343         | 5  |
| 18 | 2396.0671 | 1198.5372       | 2379.0405      | 1190.0239        | 2378.0565      | 1189.5319        | S    | 448.2150  | 224.6112        | 431.1885       | 216.0979         | 430.2045       | 215.6059         | 4  |
| 19 | 2453.0885 | 1227.0479       | 2436.0620      | 1218.5346        | 2435.0780      | 1218.0426        | G    | 361.1830  | 181.0951        | 344.1565       | 172.5819         | 343.1724       | 172.0899         | 3  |
| 20 | 2582.1311 | 1291.5692       | 2565.1046      | 1283.0559        | 2564.1206      | 1282.5639        | E    | 304.1615  | 152.5844        | 287.1350       | 144.0711         | 286.1510       | 143.5791         | 2  |
| 21 |           |                 |                |                  |                |                  | R    | 175.1190  | 88.0631         | 158.0924       | 79.5498          |                |                  | 1  |

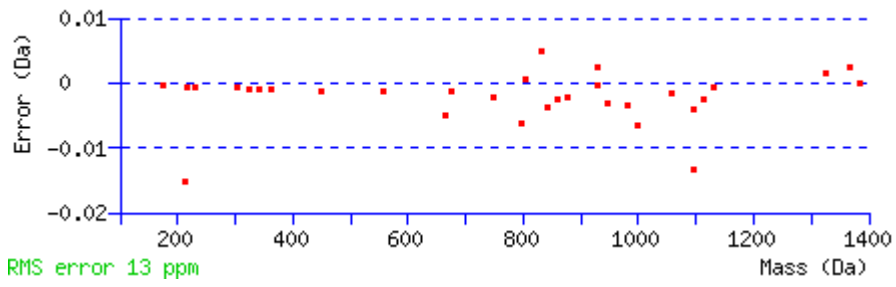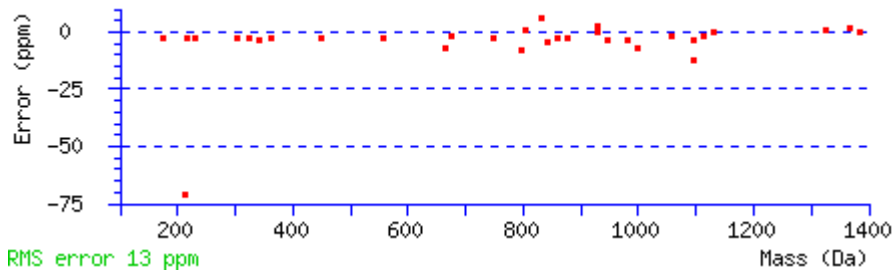

IDENTIFICATION 21

MS/MS Fragmentation of **TKIKADPDGPEAQAEACSGER**

Found in **Q9NX24**, H/A CA ribonucleoprotein complex subunit 2 OS=Homo sapiens GN=NHP2 PE=1 SV=1

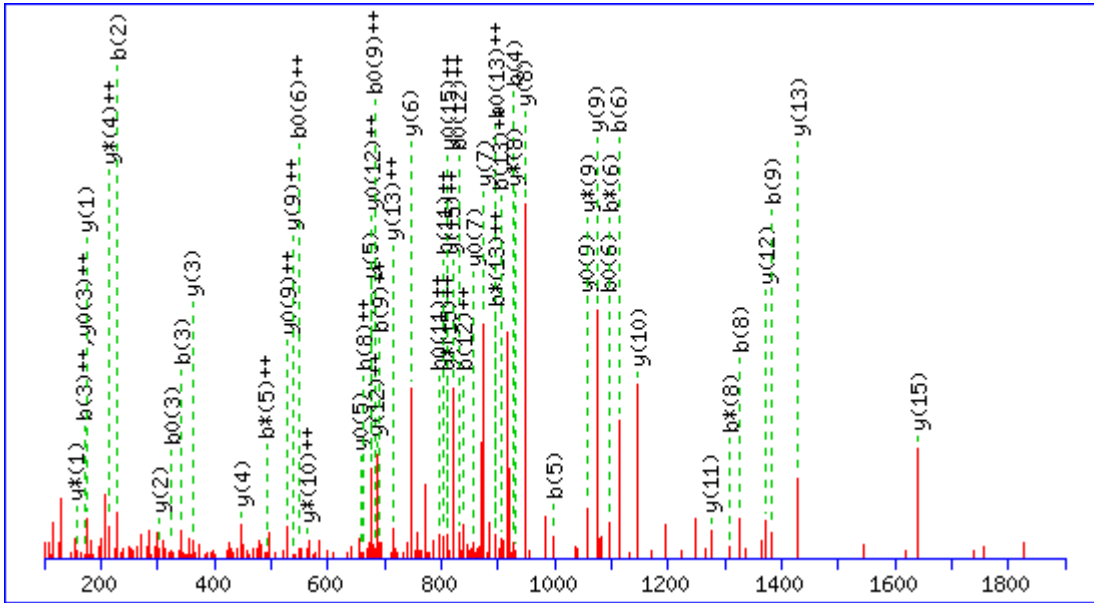

Monoisotopic mass of neutral peptide  $M_r(\text{calc})$ : 2754.2515

Variable modifications:

K4 : Sumo 3 (K)

C17 : Nethylmaleimide (C)

Ions Score: 77 Expect: 0.00011

| #  | b         | b <sup>++</sup> | b <sup>*</sup> | b <sup>+++</sup> | b <sup>0</sup> | b <sup>0++</sup> | Seq. | y         | y <sup>++</sup> | y <sup>*</sup> | y <sup>+++</sup> | y <sup>0</sup> | y <sup>0++</sup> | #  |
|----|-----------|-----------------|----------------|------------------|----------------|------------------|------|-----------|-----------------|----------------|------------------|----------------|------------------|----|
| 1  | 102.0550  | 51.5311         |                |                  | 84.0444        | 42.5258          | T    |           |                 |                |                  |                |                  | 21 |
| 2  | 230.1499  | 115.5786        | 213.1234       | 107.0653         | 212.1394       | 106.5733         | K    | 2654.2111 | 1327.6092       | 2637.1846      | 1319.0959        | 2636.2005      | 1318.6039        | 20 |
| 3  | 343.2340  | 172.1206        | 326.2074       | 163.6074         | 325.2234       | 163.1153         | I    | 2526.1161 | 1263.5617       | 2509.0896      | 1255.0484        | 2508.1056      | 1254.5564        | 19 |
| 4  | 928.5211  | 464.7642        | 911.4945       | 456.2509         | 910.5105       | 455.7589         | K    | 2413.0321 | 1207.0197       | 2396.0055      | 1198.5064        | 2395.0215      | 1198.0144        | 18 |
| 5  | 999.5582  | 500.2827        | 982.5316       | 491.7694         | 981.5476       | 491.2774         | A    | 1827.7450 | 914.3761        | 1810.7185      | 905.8629         | 1809.7344      | 905.3709         | 17 |
| 6  | 1114.5851 | 557.7962        | 1097.5586      | 549.2829         | 1096.5745      | 548.7909         | D    | 1756.7079 | 878.8576        | 1739.6813      | 870.3443         | 1738.6973      | 869.8523         | 16 |
| 7  | 1211.6379 | 606.3226        | 1194.6113      | 597.8093         | 1193.6273      | 597.3173         | P    | 1641.6809 | 821.3441        | 1624.6544      | 812.8308         | 1623.6704      | 812.3388         | 15 |
| 8  | 1326.6648 | 663.8360        | 1309.6383      | 655.3228         | 1308.6543      | 654.8308         | D    | 1544.6282 | 772.8177        | 1527.6016      | 764.3045         | 1526.6176      | 763.8124         | 14 |
| 9  | 1383.6863 | 692.3468        | 1366.6597      | 683.8335         | 1365.6757      | 683.3415         | G    | 1429.6012 | 715.3043        | 1412.5747      | 706.7910         | 1411.5907      | 706.2990         | 13 |
| 10 | 1480.7390 | 740.8732        | 1463.7125      | 732.3599         | 1462.7285      | 731.8679         | P    | 1372.5798 | 686.7935        | 1355.5532      | 678.2802         | 1354.5692      | 677.7882         | 12 |
| 11 | 1609.7816 | 805.3945        | 1592.7551      | 796.8812         | 1591.7711      | 796.3892         | E    | 1275.5270 | 638.2671        | 1258.5005      | 629.7539         | 1257.5164      | 629.2619         | 11 |
| 12 | 1680.8188 | 840.9130        | 1663.7922      | 832.3997         | 1662.8082      | 831.9077         | A    | 1146.4844 | 573.7458        | 1129.4579      | 565.2326         | 1128.4738      | 564.7406         | 10 |
| 13 | 1808.8773 | 904.9423        | 1791.8508      | 896.4290         | 1790.8668      | 895.9370         | Q    | 1075.4473 | 538.2273        | 1058.4208      | 529.7140         | 1057.4367      | 529.2220         | 9  |
| 14 | 1879.9144 | 940.4609        | 1862.8879      | 931.9476         | 1861.9039      | 931.4556         | A    | 947.3887  | 474.1980        | 930.3622       | 465.6847         | 929.3782       | 465.1927         | 8  |
| 15 | 2008.9570 | 1004.9822       | 1991.9305      | 996.4689         | 1990.9465      | 995.9769         | E    | 876.3516  | 438.6794        | 859.3251       | 430.1662         | 858.3410       | 429.6742         | 7  |
| 16 | 2079.9942 | 1040.5007       | 2062.9676      | 1031.9874        | 2061.9836      | 1031.4954        | A    | 747.3090  | 374.1581        | 730.2825       | 365.6449         | 729.2985       | 365.1529         | 6  |
| 17 | 2308.0510 | 1154.5291       | 2291.0245      | 1146.0159        | 2290.0405      | 1145.5239        | C    | 676.2719  | 338.6396        | 659.2454       | 330.1263         | 658.2613       | 329.6343         | 5  |
| 18 | 2395.0830 | 1198.0452       | 2378.0565      | 1189.5319        | 2377.0725      | 1189.0399        | S    | 448.2150  | 224.6112        | 431.1885       | 216.0979         | 430.2045       | 215.6059         | 4  |
| 19 | 2452.1045 | 1226.5559       | 2435.0780      | 1218.0426        | 2434.0939      | 1217.5506        | G    | 361.1830  | 181.0951        | 344.1565       | 172.5819         | 343.1724       | 172.0899         | 3  |
| 20 | 2581.1471 | 1291.0772       | 2564.1206      | 1282.5639        | 2563.1365      | 1282.0719        | E    | 304.1615  | 152.5844        | 287.1350       | 144.0711         | 286.1510       | 143.5791         | 2  |
| 21 |           |                 |                |                  |                |                  | R    | 175.1190  | 88.0631         | 158.0924       | 79.5498          |                |                  | 1  |

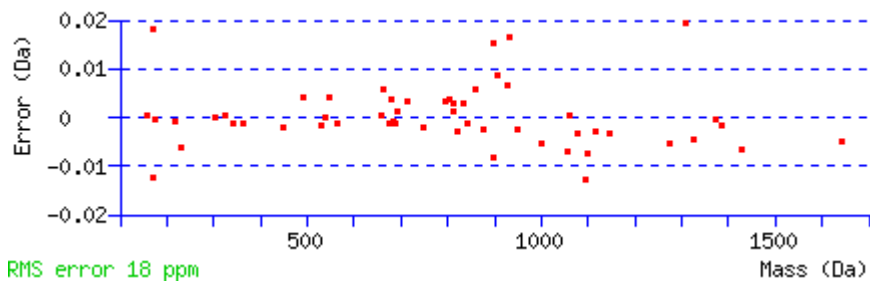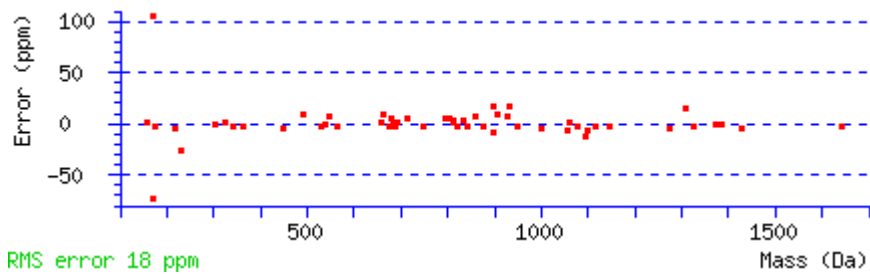

IDENTIFICATION 22

MS/MS Fragmentation of **TLSDYNIQKESTLHLVLR**

Found in **P62987**, Ubiquitin-60S ribosomal protein L40 OS=Homo sapiens GN=UBA52 PE=1 SV=2

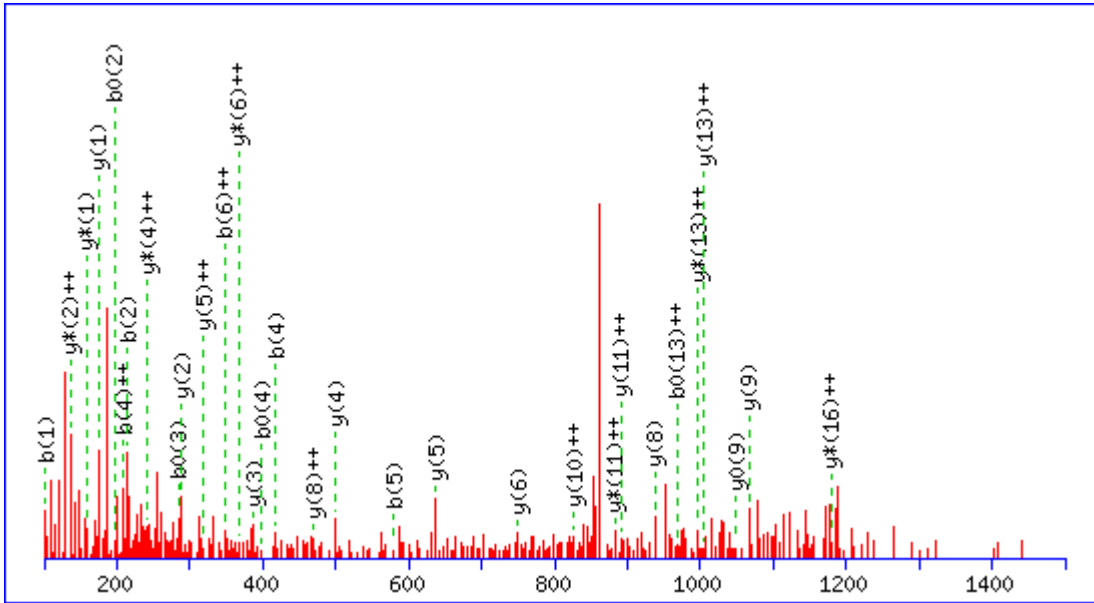

Monoisotopic mass of neutral peptide  $M_r(\text{calc})$ : 2587.3242

Variable modifications:

N6 : Deamidated (NQ)

K9 : Sumo 3 (K)

Ions Score: 10 Expect: 1.7e+02

| #  | b         | b <sup>++</sup> | b <sup>*</sup> | b <sup>+++</sup> | b <sup>0</sup> | b <sup>0++</sup> | Seq. | y         | y <sup>++</sup> | y <sup>*</sup> | y <sup>+++</sup> | y <sup>0</sup> | y <sup>0++</sup> | #  |
|----|-----------|-----------------|----------------|------------------|----------------|------------------|------|-----------|-----------------|----------------|------------------|----------------|------------------|----|
| 1  | 102.0550  | 51.5311         |                |                  | 84.0444        | 42.5258          | T    |           |                 |                |                  |                |                  | 18 |
| 2  | 215.1390  | 108.0731        |                |                  | 197.1285       | 99.0679          | L    | 2487.2838 | 1244.1455       | 2470.2572      | 1235.6323        | 2469.2732      | 1235.1403        | 17 |
| 3  | 302.1710  | 151.5892        |                |                  | 284.1605       | 142.5839         | S    | 2374.1997 | 1187.6035       | 2357.1732      | 1179.0902        | 2356.1892      | 1178.5982        | 16 |
| 4  | 417.1980  | 209.1026        |                |                  | 399.1874       | 200.0974         | D    | 2287.1677 | 1144.0875       | 2270.1412      | 1135.5742        | 2269.1571      | 1135.0822        | 15 |
| 5  | 580.2613  | 290.6343        |                |                  | 562.2508       | 281.6290         | Y    | 2172.1408 | 1086.5740       | 2155.1142      | 1078.0607        | 2154.1302      | 1077.5687        | 14 |
| 6  | 695.2883  | 348.1478        | 678.2617       | 339.6345         | 677.2777       | 339.1425         | N    | 2009.0774 | 1005.0424       | 1992.0509      | 996.5291         | 1991.0669      | 996.0371         | 13 |
| 7  | 808.3723  | 404.6898        | 791.3458       | 396.1765         | 790.3618       | 395.6845         | I    | 1894.0505 | 947.5289        | 1877.0239      | 939.0156         | 1876.0399      | 938.5236         | 12 |
| 8  | 936.4309  | 468.7191        | 919.4044       | 460.2058         | 918.4203       | 459.7138         | Q    | 1780.9664 | 890.9868        | 1763.9399      | 882.4736         | 1762.9559      | 881.9816         | 11 |
| 9  | 1521.7180 | 761.3626        | 1504.6914      | 752.8494         | 1503.7074      | 752.3573         | K    | 1652.9078 | 826.9576        | 1635.8813      | 818.4443         | 1634.8973      | 817.9523         | 10 |
| 10 | 1650.7606 | 825.8839        | 1633.7340      | 817.3706         | 1632.7500      | 816.8786         | E    | 1067.6208 | 534.3140        | 1050.5942      | 525.8007         | 1049.6102      | 525.3087         | 9  |
| 11 | 1737.7926 | 869.3999        | 1720.7661      | 860.8867         | 1719.7820      | 860.3947         | S    | 938.5782  | 469.7927        | 921.5516       | 461.2795         | 920.5676       | 460.7874         | 8  |
| 12 | 1838.8403 | 919.9238        | 1821.8137      | 911.4105         | 1820.8297      | 910.9185         | T    | 851.5461  | 426.2767        | 834.5196       | 417.7634         | 833.5356       | 417.2714         | 7  |
| 13 | 1951.9243 | 976.4658        | 1934.8978      | 967.9525         | 1933.9138      | 967.4605         | L    | 750.4985  | 375.7529        | 733.4719       | 367.2396         |                |                  | 6  |
| 14 | 2088.9833 | 1044.9953       | 2071.9567      | 1036.4820        | 2070.9727      | 1035.9900        | H    | 637.4144  | 319.2108        | 620.3879       | 310.6976         |                |                  | 5  |
| 15 | 2202.0673 | 1101.5373       | 2185.0408      | 1093.0240        | 2184.0568      | 1092.5320        | L    | 500.3555  | 250.6814        | 483.3289       | 242.1681         |                |                  | 4  |
| 16 | 2301.1357 | 1151.0715       | 2284.1092      | 1142.5582        | 2283.1252      | 1142.0662        | V    | 387.2714  | 194.1394        | 370.2449       | 185.6261         |                |                  | 3  |
| 17 | 2414.2198 | 1207.6135       | 2397.1932      | 1199.1003        | 2396.2092      | 1198.6083        | L    | 288.2030  | 144.6051        | 271.1765       | 136.0919         |                |                  | 2  |
| 18 |           |                 |                |                  |                |                  | R    | 175.1190  | 88.0631         | 158.0924       | 79.5498          |                |                  | 1  |



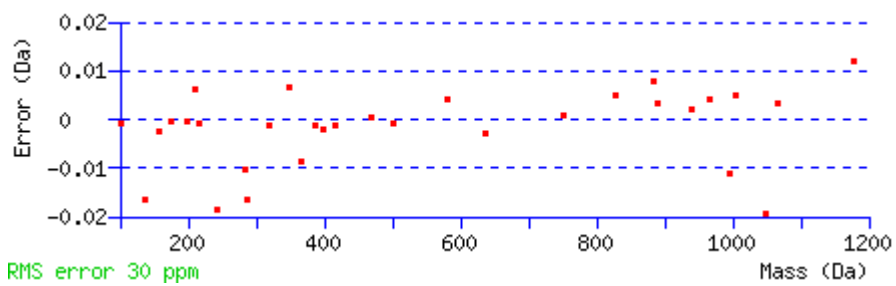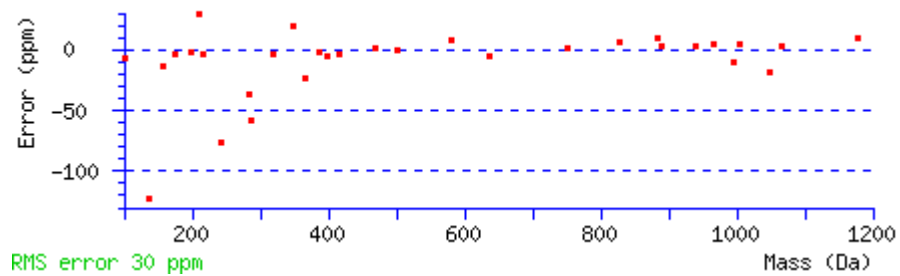

IDENTIFICATION 23

MS/MS Fragmentation of **VVTKPGHIINPIKAEDVGYR**

Found in **Q9BVJ6**, U3 small nucleolar RNA-associated protein 14 homolog A OS=Homo sapiens GN=UTP14A PE=1 SV=1

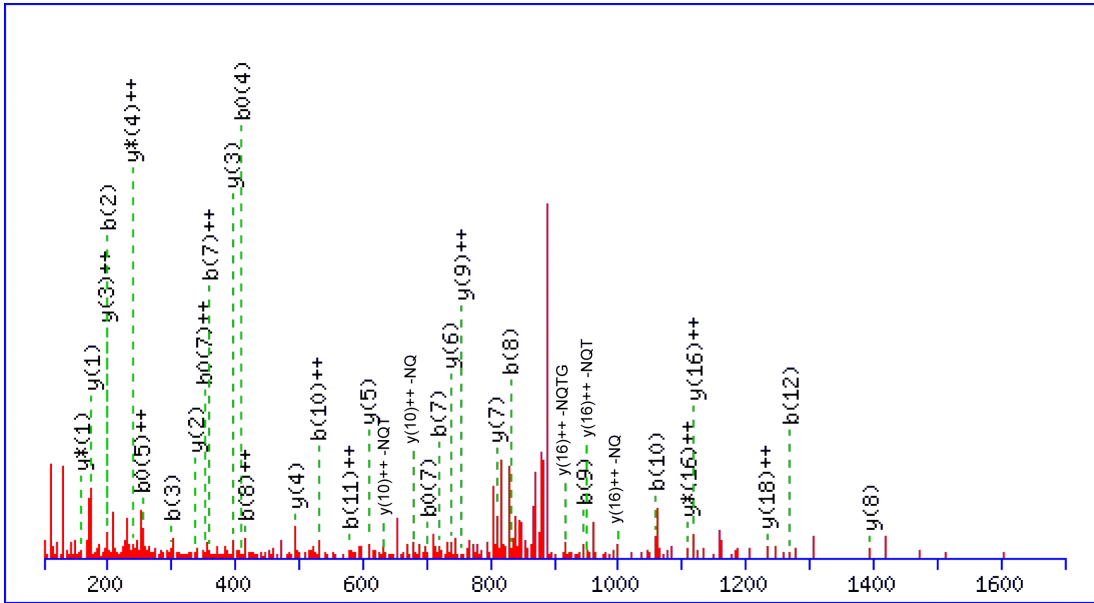

Monoisotopic mass of neutral peptide  $M_r(\text{calc})$ : 2662.4191

Variable modifications:

K13 : Sumo 3 (K)

Ions Score: 2 Expect: 3.6e+02

| #  | b         | b <sup>++</sup> | b <sup>*</sup> | b <sup>+++</sup> | b <sup>0</sup> | b <sup>0++</sup> | Seq. | y         | y <sup>++</sup> | y <sup>*</sup> | y <sup>+++</sup> | y <sup>0</sup> | y <sup>0++</sup> | #  |
|----|-----------|-----------------|----------------|------------------|----------------|------------------|------|-----------|-----------------|----------------|------------------|----------------|------------------|----|
| 1  | 100.0757  | 50.5415         |                |                  |                |                  | V    |           |                 |                |                  |                |                  | 20 |
| 2  | 199.1441  | 100.0757        |                |                  |                |                  | V    | 2564.3580 | 1282.6826       | 2547.3314      | 1274.1693        | 2546.3474      | 1273.6773        | 19 |
| 3  | 300.1918  | 150.5995        |                |                  | 282.1812       | 141.5942         | T    | 2465.2895 | 1233.1484       | 2448.2630      | 1224.6351        | 2447.2790      | 1224.1431        | 18 |
| 4  | 428.2867  | 214.6470        | 411.2602       | 206.1337         | 410.2762       | 205.6417         | K    | 2364.2419 | 1182.6246       | 2347.2153      | 1174.1113        | 2346.2313      | 1173.6193        | 17 |
| 5  | 525.3395  | 263.1734        | 508.3130       | 254.6601         | 507.3289       | 254.1681         | P    | 2236.1469 | 1118.5771       | 2219.1204      | 1110.0638        | 2218.1363      | 1109.5718        | 16 |
| 6  | 582.3610  | 291.6841        | 565.3344       | 283.1709         | 564.3504       | 282.6788         | G    | 2139.0941 | 1070.0507       | 2122.0676      | 1061.5374        | 2121.0836      | 1061.0454        | 15 |
| 7  | 719.4199  | 360.2136        | 702.3933       | 351.7003         | 701.4093       | 351.2083         | H    | 2082.0727 | 1041.5400       | 2065.0461      | 1033.0267        | 2064.0621      | 1032.5347        | 14 |
| 8  | 832.5040  | 416.7556        | 815.4774       | 408.2423         | 814.4934       | 407.7503         | I    | 1945.0138 | 973.0105        | 1927.9872      | 964.4972         | 1927.0032      | 964.0052         | 13 |
| 9  | 945.5880  | 473.2976        | 928.5615       | 464.7844         | 927.5774       | 464.2924         | I    | 1831.9297 | 916.4685        | 1814.9032      | 907.9552         | 1813.9191      | 907.4632         | 12 |
| 10 | 1059.6309 | 530.3191        | 1042.6044      | 521.8058         | 1041.6204      | 521.3138         | N    | 1718.8456 | 859.9265        | 1701.8191      | 851.4132         | 1700.8351      | 850.9212         | 11 |
| 11 | 1156.6837 | 578.8455        | 1139.6572      | 570.3322         | 1138.6731      | 569.8402         | P    | 1604.8027 | 802.9050        | 1587.7762      | 794.3917         | 1586.7921      | 793.8997         | 10 |
| 12 | 1269.7678 | 635.3875        | 1252.7412      | 626.8742         | 1251.7572      | 626.3822         | I    | 1507.7499 | 754.3786        | 1490.7234      | 745.8653         | 1489.7394      | 745.3733         | 9  |
| 13 | 1855.0548 | 928.0311        | 1838.0283      | 919.5178         | 1837.0443      | 919.0258         | K    | 1394.6659 | 697.8366        | 1377.6393      | 689.3233         | 1376.6553      | 688.8313         | 8  |
| 14 | 1926.0920 | 963.5496        | 1909.0654      | 955.0363         | 1908.0814      | 954.5443         | A    | 809.3788  | 405.1930        | 792.3523       | 396.6798         | 791.3682       | 396.1878         | 7  |
| 15 | 2055.1345 | 1028.0709       | 2038.1080      | 1019.5576        | 2037.1240      | 1019.0656        | E    | 738.3417  | 369.6745        | 721.3151       | 361.1612         | 720.3311       | 360.6692         | 6  |
| 16 | 2170.1615 | 1085.5844       | 2153.1349      | 1077.0711        | 2152.1509      | 1076.5791        | D    | 609.2991  | 305.1532        | 592.2726       | 296.6399         | 591.2885       | 296.1479         | 5  |
| 17 | 2269.2299 | 1135.1186       | 2252.2034      | 1126.6053        | 2251.2193      | 1126.1133        | V    | 494.2722  | 247.6397        | 477.2456       | 239.1264         |                |                  | 4  |
| 18 | 2326.2514 | 1163.6293       | 2309.2248      | 1155.1160        | 2308.2408      | 1154.6240        | G    | 395.2037  | 198.1055        | 378.1772       | 189.5922         |                |                  | 3  |
| 19 | 2489.3147 | 1245.1610       | 2472.2882      | 1236.6477        | 2471.3041      | 1236.1557        | Y    | 338.1823  | 169.5948        | 321.1557       | 161.0815         |                |                  | 2  |
| 20 |           |                 |                |                  |                |                  | R    | 175.1190  | 88.0631         | 158.0924       | 79.5498          |                |                  | 1  |

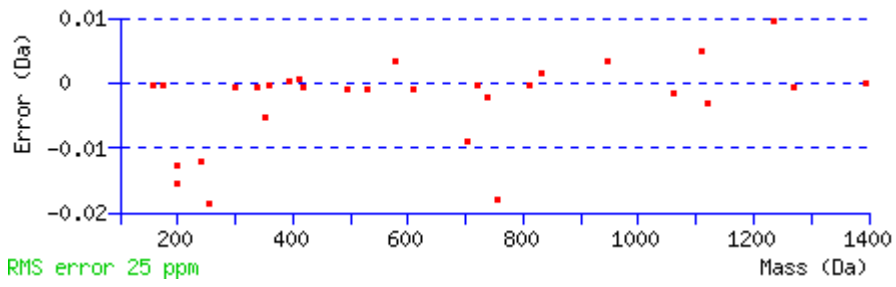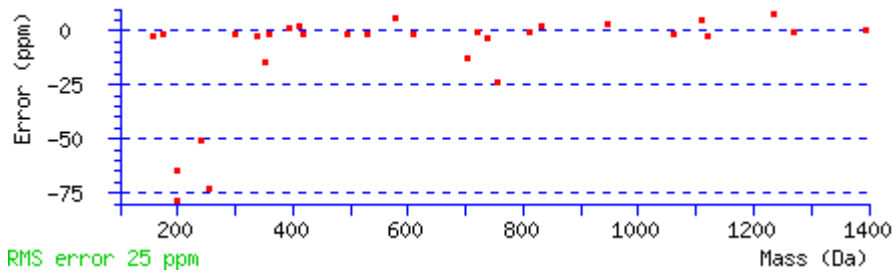

IDENTIFICATION 24

MS/MS Fragmentation of **ADEKPKEGVK**

Found in **P61956**, Small ubiquitin-related modifier 2 OS=Homo sapiens GN=SUMO2 PE=1 SV=3

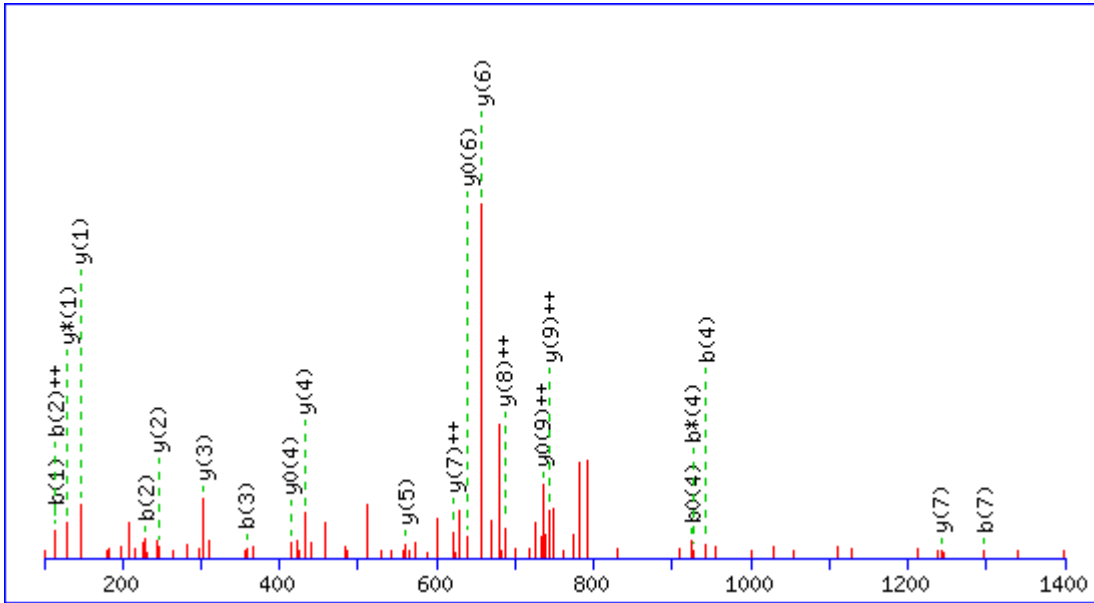

Monoisotopic mass of neutral peptide  $M_r(\text{calc})$ : 1598.7900

Variable modifications:

N-term : Acetyl (N-term)

K4 : Sumo 3 (K)

Ions Score: 24 Expect: 5.4

| #  | b         | b <sup>++</sup> | b <sup>*</sup> | b <sup>+++</sup> | b <sup>0</sup> | b <sup>0++</sup> | Seq. | y         | y <sup>++</sup> | y <sup>*</sup> | y <sup>+++</sup> | y <sup>0</sup> | y <sup>0++</sup> | #  |
|----|-----------|-----------------|----------------|------------------|----------------|------------------|------|-----------|-----------------|----------------|------------------|----------------|------------------|----|
| 1  | 114.0550  | 57.5311         |                |                  |                |                  | A    |           |                 |                |                  |                |                  | 10 |
| 2  | 229.0819  | 115.0446        |                |                  | 211.0713       | 106.0393         | D    | 1486.7496 | 743.8784        | 1469.7231      | 735.3652         | 1468.7390      | 734.8732         | 9  |
| 3  | 358.1245  | 179.5659        |                |                  | 340.1139       | 170.5606         | E    | 1371.7227 | 686.3650        | 1354.6961      | 677.8517         | 1353.7121      | 677.3597         | 8  |
| 4  | 943.4116  | 472.2094        | 926.3850       | 463.6961         | 925.4010       | 463.2041         | K    | 1242.6801 | 621.8437        | 1225.6535      | 613.3304         | 1224.6695      | 612.8384         | 7  |
| 5  | 1040.4643 | 520.7358        | 1023.4378      | 512.2225         | 1022.4538      | 511.7305         | P    | 657.3930  | 329.2001        | 640.3665       | 320.6869         | 639.3824       | 320.1949         | 6  |
| 6  | 1168.5593 | 584.7833        | 1151.5327      | 576.2700         | 1150.5487      | 575.7780         | K    | 560.3402  | 280.6738        | 543.3137       | 272.1605         | 542.3297       | 271.6685         | 5  |
| 7  | 1297.6019 | 649.3046        | 1280.5753      | 640.7913         | 1279.5913      | 640.2993         | E    | 432.2453  | 216.6263        | 415.2187       | 208.1130         | 414.2347       | 207.6210         | 4  |
| 8  | 1354.6233 | 677.8153        | 1337.5968      | 669.3020         | 1336.6128      | 668.8100         | G    | 303.2027  | 152.1050        | 286.1761       | 143.5917         |                |                  | 3  |
| 9  | 1453.6918 | 727.3495        | 1436.6652      | 718.8362         | 1435.6812      | 718.3442         | V    | 246.1812  | 123.5942        | 229.1547       | 115.0810         |                |                  | 2  |
| 10 |           |                 |                |                  |                |                  | K    | 147.1128  | 74.0600         | 130.0863       | 65.5468          |                |                  | 1  |

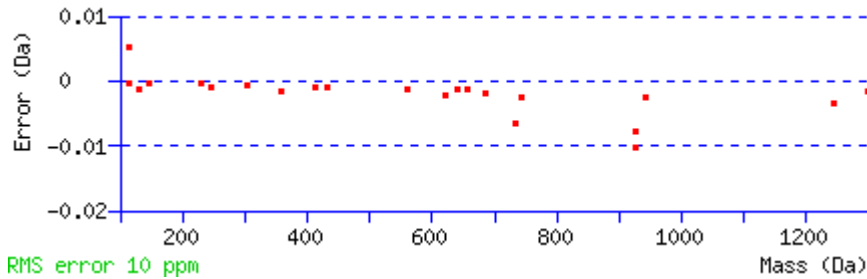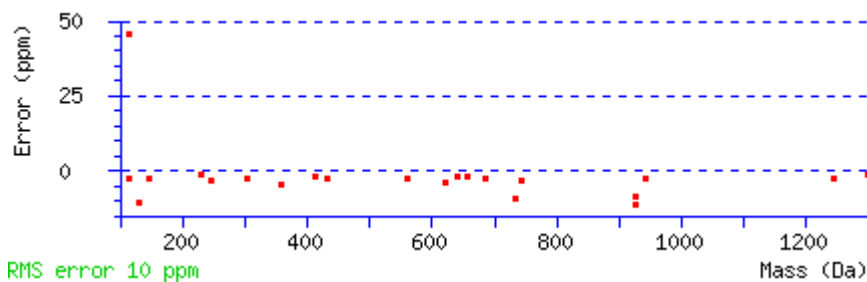

IDENTIFICATION 26

MS/MS Fragmentation of **ADEKPKEGVKTENNDHNLK**

Found in **P61956**, Small ubiquitin-related modifier 2 OS=Homo sapiens GN=SUMO2 PE=1 SV=3

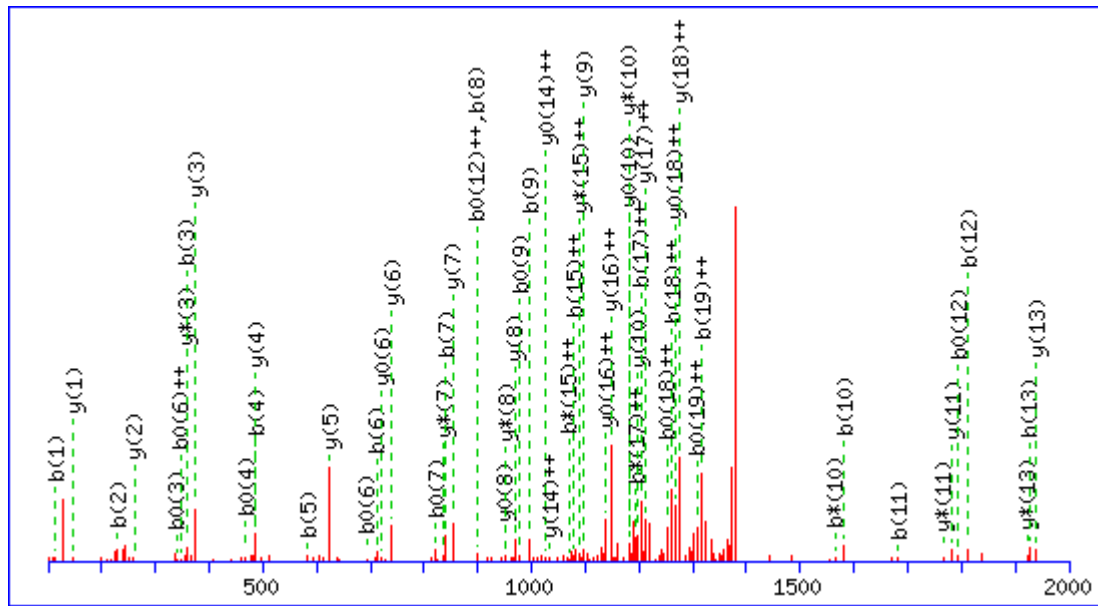

Monoisotopic mass of neutral peptide  $M_r(\text{calc})$ : 2778.3420

Variable modifications:

N-term : Acetyl (N-term)

K10 : Sumo 3 (K)

N13 : Deamidated (NQ)

Ions Score: 87 Expect: 7.3e-06

| #  | b         | b <sup>++</sup> | b <sup>*</sup> | b <sup>+++</sup> | b <sup>0</sup> | b <sup>0++</sup> | Seq. | y         | y <sup>++</sup> | y <sup>*</sup> | y <sup>+++</sup> | y <sup>0</sup> | y <sup>0++</sup> | #  |
|----|-----------|-----------------|----------------|------------------|----------------|------------------|------|-----------|-----------------|----------------|------------------|----------------|------------------|----|
| 1  | 114.0550  | 57.5311         |                |                  |                |                  | A    |           |                 |                |                  |                |                  | 20 |
| 2  | 229.0819  | 115.0446        |                |                  | 211.0713       | 106.0393         | D    | 2666.3016 | 1333.6545       | 2649.2751      | 1325.1412        | 2648.2911      | 1324.6492        | 19 |
| 3  | 358.1245  | 179.5659        |                |                  | 340.1139       | 170.5606         | E    | 2551.2747 | 1276.1410       | 2534.2481      | 1267.6277        | 2533.2641      | 1267.1357        | 18 |
| 4  | 486.2195  | 243.6134        | 469.1929       | 235.1001         | 468.2089       | 234.6081         | K    | 2422.2321 | 1211.6197       | 2405.2055      | 1203.1064        | 2404.2215      | 1202.6144        | 17 |
| 5  | 583.2722  | 292.1397        | 566.2457       | 283.6265         | 565.2617       | 283.1345         | P    | 2294.1371 | 1147.5722       | 2277.1106      | 1139.0589        | 2276.1266      | 1138.5669        | 16 |
| 6  | 711.3672  | 356.1872        | 694.3406       | 347.6740         | 693.3566       | 347.1819         | K    | 2197.0844 | 1099.0458       | 2180.0578      | 1090.5325        | 2179.0738      | 1090.0405        | 15 |
| 7  | 840.4098  | 420.7085        | 823.3832       | 412.1953         | 822.3992       | 411.7032         | E    | 2068.9894 | 1034.9983       | 2051.9629      | 1026.4851        | 2050.9788      | 1025.9931        | 14 |
| 8  | 897.4312  | 449.2193        | 880.4047       | 440.7060         | 879.4207       | 440.2140         | G    | 1939.9468 | 970.4770        | 1922.9203      | 961.9638         | 1921.9362      | 961.4718         | 13 |
| 9  | 996.4997  | 498.7535        | 979.4731       | 490.2402         | 978.4891       | 489.7482         | V    | 1882.9253 | 941.9663        | 1865.8988      | 933.4530         | 1864.9148      | 932.9610         | 12 |
| 10 | 1581.7867 | 791.3970        | 1564.7602      | 782.8837         | 1563.7762      | 782.3917         | K    | 1783.8569 | 892.4321        | 1766.8304      | 883.9188         | 1765.8464      | 883.4268         | 11 |
| 11 | 1682.8344 | 841.9208        | 1665.8079      | 833.4076         | 1664.8238      | 832.9156         | T    | 1198.5699 | 599.7886        | 1181.5433      | 591.2753         | 1180.5593      | 590.7833         | 10 |
| 12 | 1811.8770 | 906.4421        | 1794.8504      | 897.9289         | 1793.8664      | 897.4369         | E    | 1097.5222 | 549.2647        | 1080.4956      | 540.7515         | 1079.5116      | 540.2594         | 9  |
| 13 | 1926.9039 | 963.9556        | 1909.8774      | 955.4423         | 1908.8934      | 954.9503         | N    | 968.4796  | 484.7434        | 951.4530       | 476.2302         | 950.4690       | 475.7381         | 8  |
| 14 | 2040.9469 | 1020.9771       | 2023.9203      | 1012.4638        | 2022.9363      | 1011.9718        | N    | 853.4526  | 427.2300        | 836.4261       | 418.7167         | 835.4421       | 418.2247         | 7  |
| 15 | 2155.9738 | 1078.4905       | 2138.9473      | 1069.9773        | 2137.9632      | 1069.4853        | D    | 739.4097  | 370.2085        | 722.3832       | 361.6952         | 721.3991       | 361.2032         | 6  |
| 16 | 2293.0327 | 1147.0200       | 2276.0062      | 1138.5067        | 2275.0222      | 1138.0147        | H    | 624.3828  | 312.6950        | 607.3562       | 304.1817         |                |                  | 5  |
| 17 | 2406.1168 | 1203.5620       | 2389.0902      | 1195.0488        | 2388.1062      | 1194.5567        | I    | 487.3239  | 244.1656        | 470.2973       | 235.6523         |                |                  | 4  |
| 18 | 2520.1597 | 1260.5835       | 2503.1332      | 1252.0702        | 2502.1491      | 1251.5782        | N    | 374.2398  | 187.6235        | 357.2132       | 179.1103         |                |                  | 3  |
| 19 | 2633.2438 | 1317.1255       | 2616.2172      | 1308.6123        | 2615.2332      | 1308.1202        | L    | 260.1969  | 130.6021        | 243.1703       | 122.0888         |                |                  | 2  |
| 20 |           |                 |                |                  |                |                  | K    | 147.1128  | 74.0600         | 130.0863       | 65.5468          |                |                  | 1  |

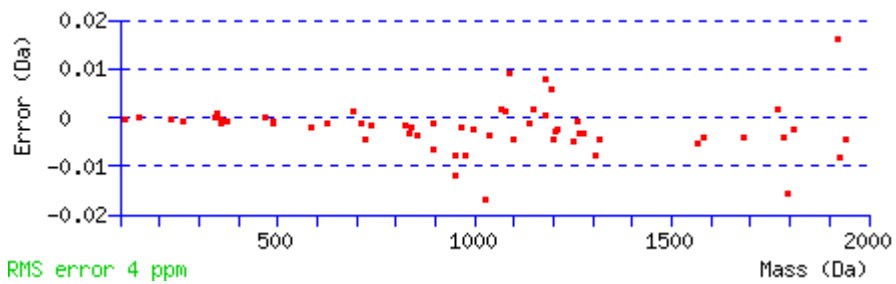

RMS error 4 ppm

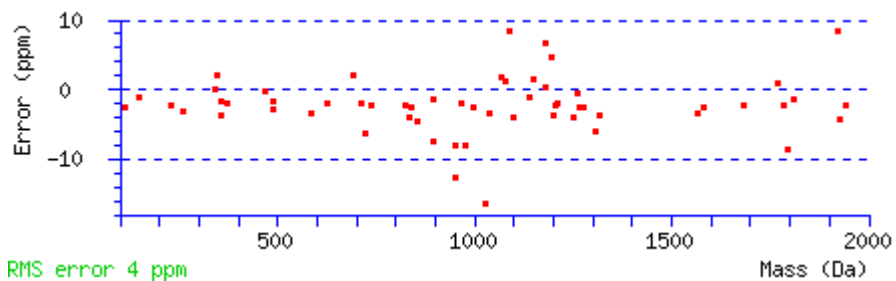

RMS error 4 ppm

IDENTIFICATION 27

MS/MS Fragmentation of **ADEKPKEGVKTENNDHNLK**

Found in **P61956**, Small ubiquitin-related modifier 2 OS=Homo sapiens GN=SUMO2 PE=1 SV=3

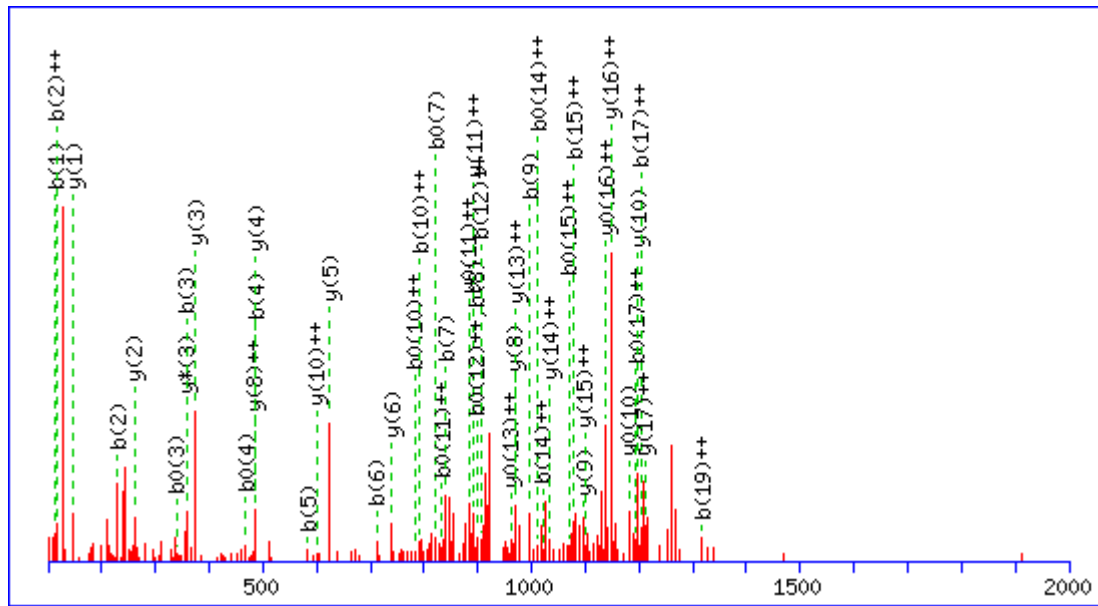

Monoisotopic mass of neutral peptide  $M_r(\text{calc})$ : 2778.3420

Variable modifications:

N-term : Acetyl (N-term)

K10 : Sumo 3 (K)

N14 : Deamidated (NQ)

Ions Score: 45 Expect: 0.1

| #  | b         | b <sup>++</sup> | b <sup>*</sup> | b <sup>+++</sup> | b <sup>0</sup> | b <sup>0++</sup> | Seq. | y         | y <sup>++</sup> | y <sup>*</sup> | y <sup>+++</sup> | y <sup>0</sup> | y <sup>0++</sup> | #  |
|----|-----------|-----------------|----------------|------------------|----------------|------------------|------|-----------|-----------------|----------------|------------------|----------------|------------------|----|
| 1  | 114.0550  | 57.5311         |                |                  |                |                  | A    |           |                 |                |                  |                |                  | 20 |
| 2  | 229.0819  | 115.0446        |                |                  | 211.0713       | 106.0393         | D    | 2666.3016 | 1333.6545       | 2649.2751      | 1325.1412        | 2648.2911      | 1324.6492        | 19 |
| 3  | 358.1245  | 179.5659        |                |                  | 340.1139       | 170.5606         | E    | 2551.2747 | 1276.1410       | 2534.2481      | 1267.6277        | 2533.2641      | 1267.1357        | 18 |
| 4  | 486.2195  | 243.6134        | 469.1929       | 235.1001         | 468.2089       | 234.6081         | K    | 2422.2321 | 1211.6197       | 2405.2055      | 1203.1064        | 2404.2215      | 1202.6144        | 17 |
| 5  | 583.2722  | 292.1397        | 566.2457       | 283.6265         | 565.2617       | 283.1345         | P    | 2294.1371 | 1147.5722       | 2277.1106      | 1139.0589        | 2276.1266      | 1138.5669        | 16 |
| 6  | 711.3672  | 356.1872        | 694.3406       | 347.6740         | 693.3566       | 347.1819         | K    | 2197.0844 | 1099.0458       | 2180.0578      | 1090.5325        | 2179.0738      | 1090.0405        | 15 |
| 7  | 840.4098  | 420.7085        | 823.3832       | 412.1953         | 822.3992       | 411.7032         | E    | 2068.9894 | 1034.9983       | 2051.9629      | 1026.4851        | 2050.9788      | 1025.9931        | 14 |
| 8  | 897.4312  | 449.2193        | 880.4047       | 440.7060         | 879.4207       | 440.2140         | G    | 1939.9468 | 970.4770        | 1922.9203      | 961.9638         | 1921.9362      | 961.4718         | 13 |
| 9  | 996.4997  | 498.7535        | 979.4731       | 490.2402         | 978.4891       | 489.7482         | V    | 1882.9253 | 941.9663        | 1865.8988      | 933.4530         | 1864.9148      | 932.9610         | 12 |
| 10 | 1581.7867 | 791.3970        | 1564.7602      | 782.8837         | 1563.7762      | 782.3917         | K    | 1783.8569 | 892.4321        | 1766.8304      | 883.9188         | 1765.8464      | 883.4268         | 11 |
| 11 | 1682.8344 | 841.9208        | 1665.8079      | 833.4076         | 1664.8238      | 832.9156         | T    | 1198.5699 | 599.7886        | 1181.5433      | 591.2753         | 1180.5593      | 590.7833         | 10 |
| 12 | 1811.8770 | 906.4421        | 1794.8504      | 897.9289         | 1793.8664      | 897.4369         | E    | 1097.5222 | 549.2647        | 1080.4956      | 540.7515         | 1079.5116      | 540.2594         | 9  |
| 13 | 1925.9199 | 963.4636        | 1908.8934      | 954.9503         | 1907.9094      | 954.4583         | N    | 968.4796  | 484.7434        | 951.4530       | 476.2302         | 950.4690       | 475.7381         | 8  |
| 14 | 2040.9469 | 1020.9771       | 2023.9203      | 1012.4638        | 2022.9363      | 1011.9718        | N    | 854.4367  | 427.7220        | 837.4101       | 419.2087         | 836.4261       | 418.7167         | 7  |
| 15 | 2155.9738 | 1078.4905       | 2138.9473      | 1069.9773        | 2137.9632      | 1069.4853        | D    | 739.4097  | 370.2085        | 722.3832       | 361.6952         | 721.3991       | 361.2032         | 6  |
| 16 | 2293.0327 | 1147.0200       | 2276.0062      | 1138.5067        | 2275.0222      | 1138.0147        | H    | 624.3828  | 312.6950        | 607.3562       | 304.1817         |                |                  | 5  |
| 17 | 2406.1168 | 1203.5620       | 2389.0902      | 1195.0488        | 2388.1062      | 1194.5567        | I    | 487.3239  | 244.1656        | 470.2973       | 235.6523         |                |                  | 4  |
| 18 | 2520.1597 | 1260.5835       | 2503.1332      | 1252.0702        | 2502.1491      | 1251.5782        | N    | 374.2398  | 187.6235        | 357.2132       | 179.1103         |                |                  | 3  |
| 19 | 2633.2438 | 1317.1255       | 2616.2172      | 1308.6123        | 2615.2332      | 1308.1202        | L    | 260.1969  | 130.6021        | 243.1703       | 122.0888         |                |                  | 2  |
| 20 |           |                 |                |                  |                |                  | K    | 147.1128  | 74.0600         | 130.0863       | 65.5468          |                |                  | 1  |

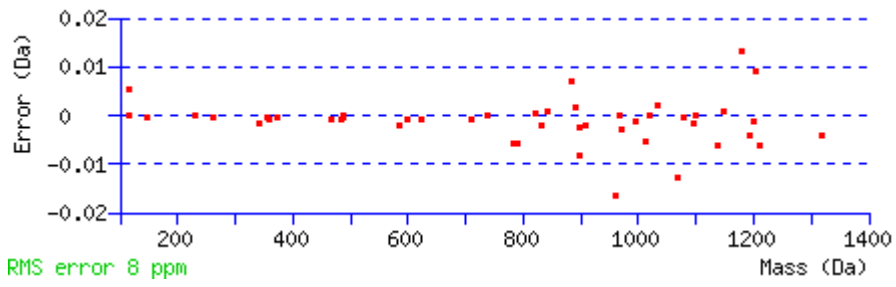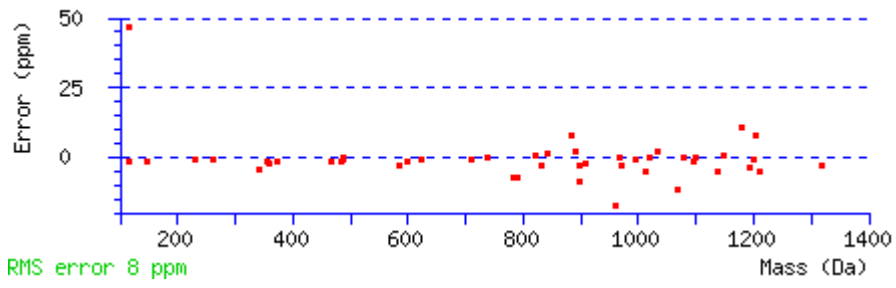



IDENTIFICATION 28

MS/MS Fragmentation of **ADEKPKEGVKTENNDHNLK**

Found in **P61956**, Small ubiquitin-related modifier 2 OS=Homo sapiens GN=SUMO2 PE=1 SV=3

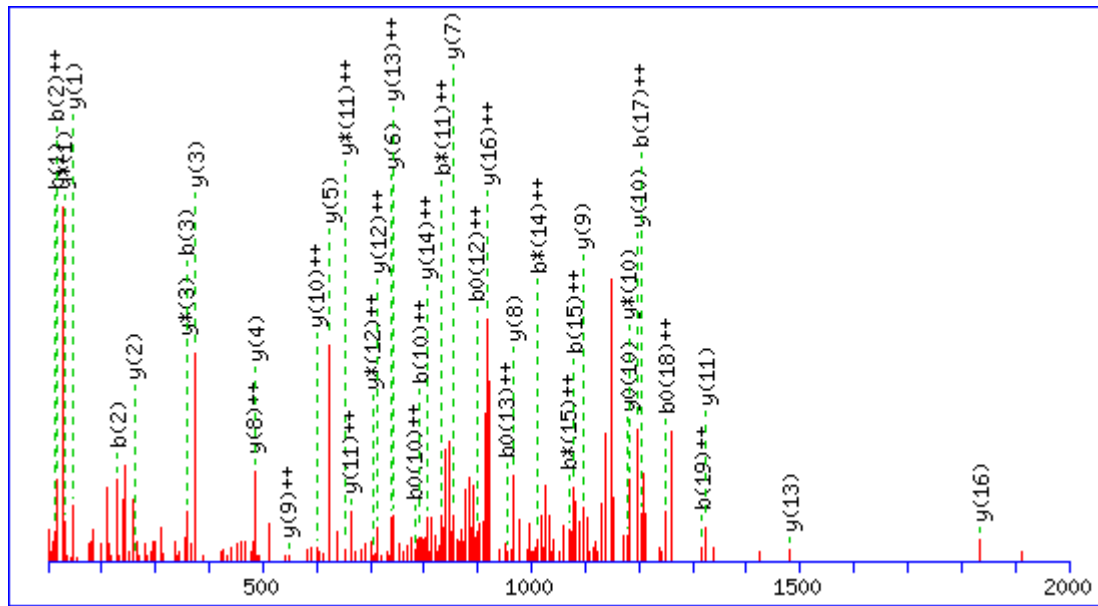

Monoisotopic mass of neutral peptide  $M_r(\text{calc})$ : 2777.3580

Variable modifications:

N-term : Acetyl (N-term)

K4 : Sumo 3 (K)

Ions Score: 43 Expect: 0.18

| #  | b         | b <sup>++</sup> | b <sup>*</sup> | b <sup>+++</sup> | b <sup>0</sup> | b <sup>0++</sup> | Seq. | y         | y <sup>++</sup> | y <sup>*</sup> | y <sup>+++</sup> | y <sup>0</sup> | y <sup>0++</sup> | #  |
|----|-----------|-----------------|----------------|------------------|----------------|------------------|------|-----------|-----------------|----------------|------------------|----------------|------------------|----|
| 1  | 114.0550  | 57.5311         |                |                  |                |                  | A    |           |                 |                |                  |                |                  | 20 |
| 2  | 229.0819  | 115.0446        |                |                  | 211.0713       | 106.0393         | D    | 2665.3176 | 1333.1624       | 2648.2911      | 1324.6492        | 2647.3070      | 1324.1572        | 19 |
| 3  | 358.1245  | 179.5659        |                |                  | 340.1139       | 170.5606         | E    | 2550.2907 | 1275.6490       | 2533.2641      | 1267.1357        | 2532.2801      | 1266.6437        | 18 |
| 4  | 943.4116  | 472.2094        | 926.3850       | 463.6961         | 925.4010       | 463.2041         | K    | 2421.2481 | 1211.1277       | 2404.2215      | 1202.6144        | 2403.2375      | 1202.1224        | 17 |
| 5  | 1040.4643 | 520.7358        | 1023.4378      | 512.2225         | 1022.4538      | 511.7305         | P    | 1835.9610 | 918.4841        | 1818.9345      | 909.9709         | 1817.9504      | 909.4789         | 16 |
| 6  | 1168.5593 | 584.7833        | 1151.5327      | 576.2700         | 1150.5487      | 575.7780         | K    | 1738.9082 | 869.9578        | 1721.8817      | 861.4445         | 1720.8977      | 860.9525         | 15 |
| 7  | 1297.6019 | 649.3046        | 1280.5753      | 640.7913         | 1279.5913      | 640.2993         | E    | 1610.8133 | 805.9103        | 1593.7867      | 797.3970         | 1592.8027      | 796.9050         | 14 |
| 8  | 1354.6233 | 677.8153        | 1337.5968      | 669.3020         | 1336.6128      | 668.8100         | G    | 1481.7707 | 741.3890        | 1464.7441      | 732.8757         | 1463.7601      | 732.3837         | 13 |
| 9  | 1453.6918 | 727.3495        | 1436.6652      | 718.8362         | 1435.6812      | 718.3442         | V    | 1424.7492 | 712.8782        | 1407.7227      | 704.3650         | 1406.7387      | 703.8730         | 12 |
| 10 | 1581.7867 | 791.3970        | 1564.7602      | 782.8837         | 1563.7762      | 782.3917         | K    | 1325.6808 | 663.3440        | 1308.6543      | 654.8308         | 1307.6702      | 654.3388         | 11 |
| 11 | 1682.8344 | 841.9208        | 1665.8079      | 833.4076         | 1664.8238      | 832.9156         | T    | 1197.5858 | 599.2966        | 1180.5593      | 590.7833         | 1179.5753      | 590.2913         | 10 |
| 12 | 1811.8770 | 906.4421        | 1794.8504      | 897.9289         | 1793.8664      | 897.4369         | E    | 1096.5382 | 548.7727        | 1079.5116      | 540.2594         | 1078.5276      | 539.7674         | 9  |
| 13 | 1925.9199 | 963.4636        | 1908.8934      | 954.9503         | 1907.9094      | 954.4583         | N    | 967.4956  | 484.2514        | 950.4690       | 475.7381         | 949.4850       | 475.2461         | 8  |
| 14 | 2039.9629 | 1020.4851       | 2022.9363      | 1011.9718        | 2021.9523      | 1011.4798        | N    | 853.4526  | 427.2300        | 836.4261       | 418.7167         | 835.4421       | 418.2247         | 7  |
| 15 | 2154.9898 | 1077.9985       | 2137.9632      | 1069.4853        | 2136.9792      | 1068.9933        | D    | 739.4097  | 370.2085        | 722.3832       | 361.6952         | 721.3991       | 361.2032         | 6  |
| 16 | 2292.0487 | 1146.5280       | 2275.0222      | 1138.0147        | 2274.0381      | 1137.5227        | H    | 624.3828  | 312.6950        | 607.3562       | 304.1817         |                |                  | 5  |
| 17 | 2405.1328 | 1203.0700       | 2388.1062      | 1194.5567        | 2387.1222      | 1194.0647        | I    | 487.3239  | 244.1656        | 470.2973       | 235.6523         |                |                  | 4  |
| 18 | 2519.1757 | 1260.0915       | 2502.1491      | 1251.5782        | 2501.1651      | 1251.0862        | N    | 374.2398  | 187.6235        | 357.2132       | 179.1103         |                |                  | 3  |
| 19 | 2632.2598 | 1316.6335       | 2615.2332      | 1308.1202        | 2614.2492      | 1307.6282        | L    | 260.1969  | 130.6021        | 243.1703       | 122.0888         |                |                  | 2  |
| 20 |           |                 |                |                  |                |                  | K    | 147.1128  | 74.0600         | 130.0863       | 65.5468          |                |                  | 1  |

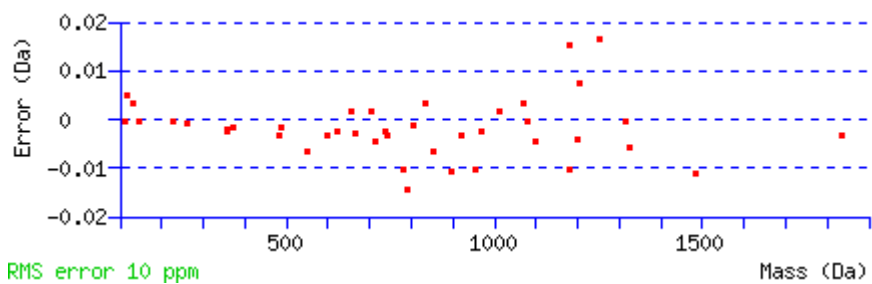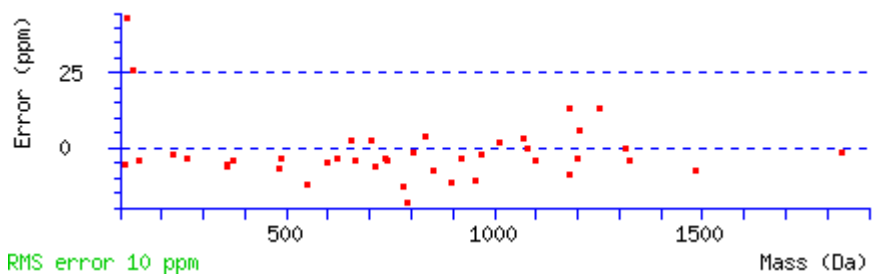

IDENTIFICATION 29

MS/MS Fragmentation of **ADEKPKEGVKTENNDHINLK**

Found in **P61956**, Small ubiquitin-related modifier 2 OS=Homo sapiens GN=SUMO2 PE=1 SV=3

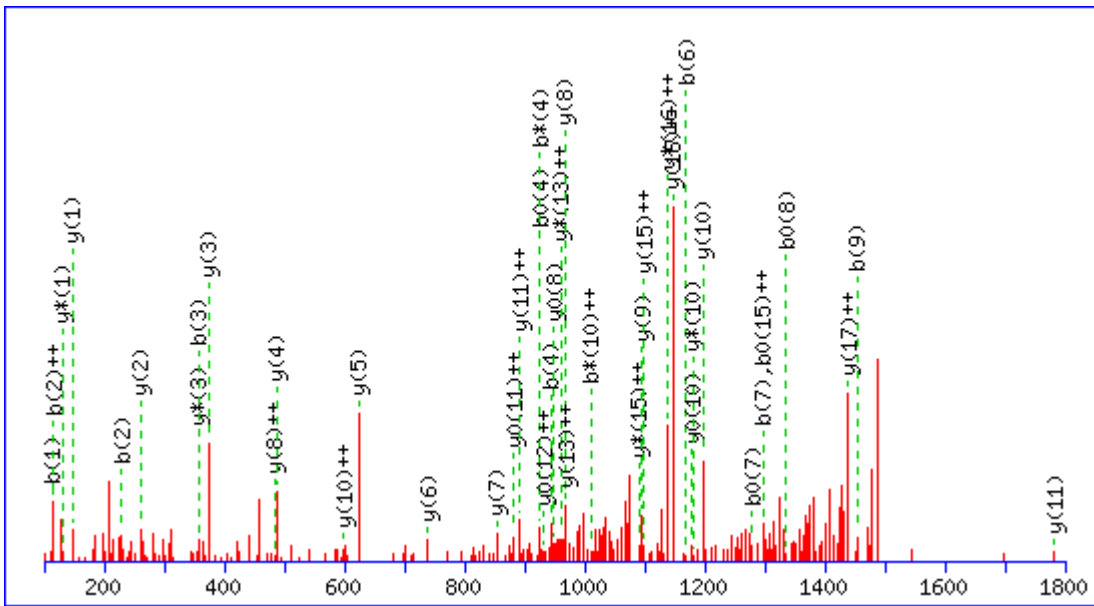

Monoisotopic mass of neutral peptide  $M_r(\text{calc})$ : 3234.5501

Variable modifications:

N-term : Acetyl (N-term)

K4 : Sumo 3 (K)

K10 : Sumo 3 (K)

Ions Score: 33 Expect: 2.1

| #  | b         | b <sup>++</sup> | b <sup>*</sup> | b <sup>+++</sup> | b <sup>0</sup> | b <sup>0++</sup> | Seq. | y         | y <sup>++</sup> | y <sup>*</sup> | y <sup>+++</sup> | y <sup>0</sup> | y <sup>0++</sup> | #  |
|----|-----------|-----------------|----------------|------------------|----------------|------------------|------|-----------|-----------------|----------------|------------------|----------------|------------------|----|
| 1  | 114.0550  | 57.5311         |                |                  |                |                  | A    |           |                 |                |                  |                |                  | 20 |
| 2  | 229.0819  | 115.0446        |                |                  | 211.0713       | 106.0393         | D    | 3122.5097 | 1561.7585       | 3105.4832      | 1553.2452        | 3104.4992      | 1552.7532        | 19 |
| 3  | 358.1245  | 179.5659        |                |                  | 340.1139       | 170.5606         | E    | 3007.4828 | 1504.2450       | 2990.4562      | 1495.7318        | 2989.4722      | 1495.2397        | 18 |
| 4  | 943.4116  | 472.2094        | 926.3850       | 463.6961         | 925.4010       | 463.2041         | K    | 2878.4402 | 1439.7237       | 2861.4136      | 1431.2105        | 2860.4296      | 1430.7184        | 17 |
| 5  | 1040.4643 | 520.7358        | 1023.4378      | 512.2225         | 1022.4538      | 511.7305         | P    | 2293.1531 | 1147.0802       | 2276.1266      | 1138.5669        | 2275.1425      | 1138.0749        | 16 |
| 6  | 1168.5593 | 584.7833        | 1151.5327      | 576.2700         | 1150.5487      | 575.7780         | K    | 2196.1003 | 1098.5538       | 2179.0738      | 1090.0405        | 2178.0898      | 1089.5485        | 15 |
| 7  | 1297.6019 | 649.3046        | 1280.5753      | 640.7913         | 1279.5913      | 640.2993         | E    | 2068.0054 | 1034.5063       | 2050.9788      | 1025.9931        | 2049.9948      | 1025.5010        | 14 |
| 8  | 1354.6233 | 677.8153        | 1337.5968      | 669.3020         | 1336.6128      | 668.8100         | G    | 1938.9628 | 969.9850        | 1921.9362      | 961.4718         | 1920.9522      | 960.9798         | 13 |
| 9  | 1453.6918 | 727.3495        | 1436.6652      | 718.8362         | 1435.6812      | 718.3442         | V    | 1881.9413 | 941.4743        | 1864.9148      | 932.9610         | 1863.9308      | 932.4690         | 12 |
| 10 | 2038.9788 | 1019.9931       | 2021.9523      | 1011.4798        | 2020.9683      | 1010.9878        | K    | 1782.8729 | 891.9401        | 1765.8464      | 883.4268         | 1764.8623      | 882.9348         | 11 |
| 11 | 2140.0265 | 1070.5169       | 2123.0000      | 1062.0036        | 2122.0160      | 1061.5116        | T    | 1197.5858 | 599.2966        | 1180.5593      | 590.7833         | 1179.5753      | 590.2913         | 10 |
| 12 | 2269.0691 | 1135.0382       | 2252.0426      | 1126.5249        | 2251.0585      | 1126.0329        | E    | 1096.5382 | 548.7727        | 1079.5116      | 540.2594         | 1078.5276      | 539.7674         | 9  |
| 13 | 2383.1120 | 1192.0597       | 2366.0855      | 1183.5464        | 2365.1015      | 1183.0544        | N    | 967.4956  | 484.2514        | 950.4690       | 475.7381         | 949.4850       | 475.2461         | 8  |
| 14 | 2497.1550 | 1249.0811       | 2480.1284      | 1240.5678        | 2479.1444      | 1240.0758        | N    | 853.4526  | 427.2300        | 836.4261       | 418.7167         | 835.4421       | 418.2247         | 7  |
| 15 | 2612.1819 | 1306.5946       | 2595.1554      | 1298.0813        | 2594.1713      | 1297.5893        | D    | 739.4097  | 370.2085        | 722.3832       | 361.6952         | 721.3991       | 361.2032         | 6  |
| 16 | 2749.2408 | 1375.1240       | 2732.2143      | 1366.6108        | 2731.2303      | 1366.1188        | H    | 624.3828  | 312.6950        | 607.3562       | 304.1817         |                |                  | 5  |
| 17 | 2862.3249 | 1431.6661       | 2845.2983      | 1423.1528        | 2844.3143      | 1422.6608        | I    | 487.3239  | 244.1656        | 470.2973       | 235.6523         |                |                  | 4  |
| 18 | 2976.3678 | 1488.6875       | 2959.3413      | 1480.1743        | 2958.3572      | 1479.6823        | N    | 374.2398  | 187.6235        | 357.2132       | 179.1103         |                |                  | 3  |
| 19 | 3089.4519 | 1545.2296       | 3072.4253      | 1536.7163        | 3071.4413      | 1536.2243        | L    | 260.1969  | 130.6021        | 243.1703       | 122.0888         |                |                  | 2  |
| 20 |           |                 |                |                  |                |                  | K    | 147.1128  | 74.0600         | 130.0863       | 65.5468          |                |                  | 1  |

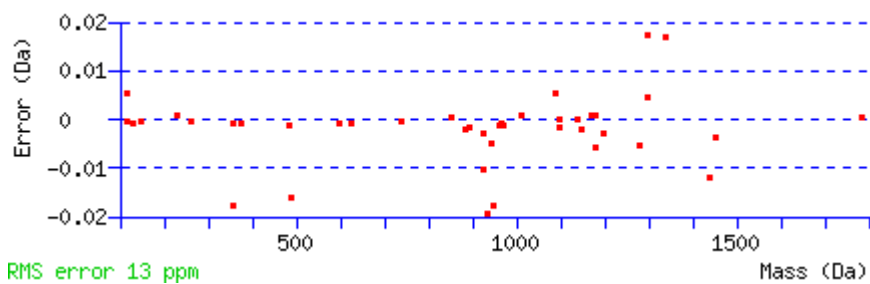

RMS error 13 ppm

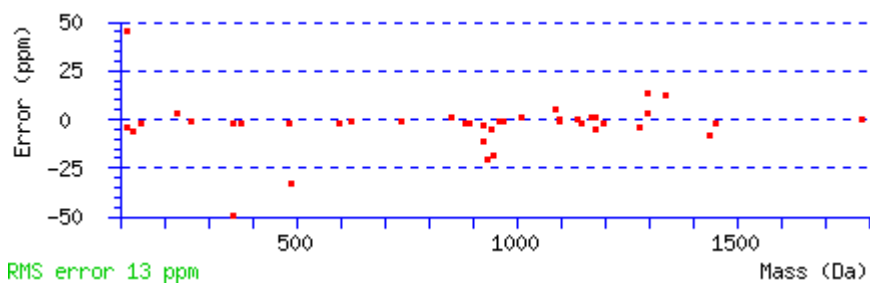

RMS error 13 ppm

IDENTIFICATION 30

MS/MS Fragmentation of **ADSL LAVVKR**

Found in **Q15424**, Scaffold attachment factor B1 OS=Homo sapiens GN=SAFB PE=1 SV=4

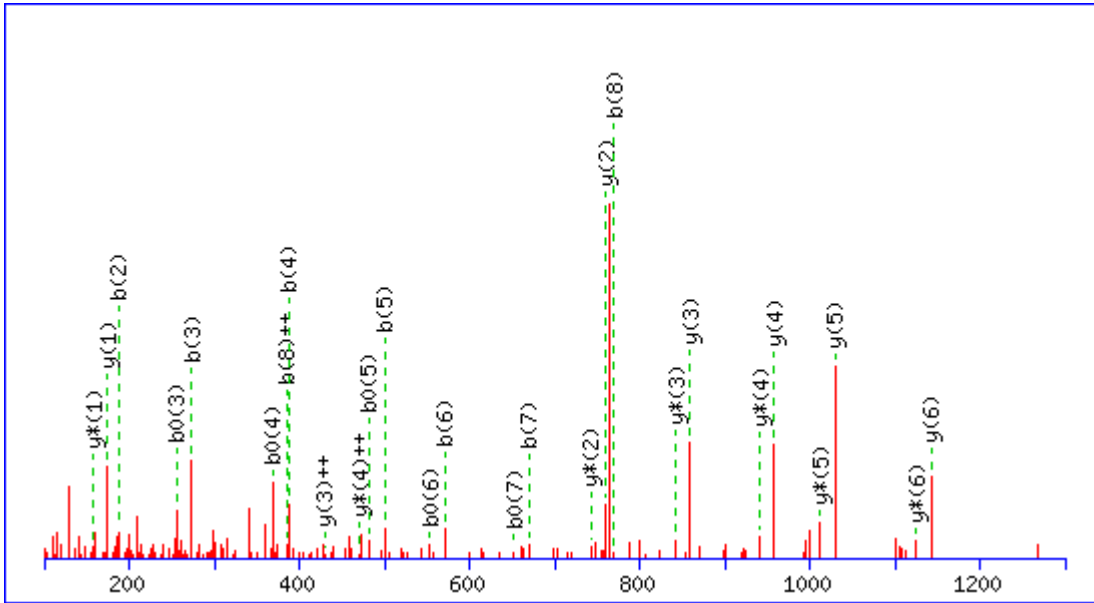

Monoisotopic mass of neutral peptide  $M_r(\text{calc})$ : 1527.8369

Variable modifications:

K9 : Sumo 3 (K)

Ions Score: 42 Expect: 0.026

| #  | b         | b <sup>++</sup> | b <sup>*</sup> | b <sup>+++</sup> | b <sup>0</sup> | b <sup>0++</sup> | Seq. | y         | y <sup>++</sup> | y <sup>*</sup> | y <sup>+++</sup> | y <sup>0</sup> | y <sup>0++</sup> | #  |
|----|-----------|-----------------|----------------|------------------|----------------|------------------|------|-----------|-----------------|----------------|------------------|----------------|------------------|----|
| 1  | 72.0444   | 36.5258         |                |                  |                |                  | A    |           |                 |                |                  |                |                  | 10 |
| 2  | 187.0713  | 94.0393         |                |                  | 169.0608       | 85.0340          | D    | 1457.8071 | 729.4072        | 1440.7805      | 720.8939         | 1439.7965      | 720.4019         | 9  |
| 3  | 274.1034  | 137.5553        |                |                  | 256.0928       | 128.5500         | S    | 1342.7801 | 671.8937        | 1325.7536      | 663.3804         | 1324.7696      | 662.8884         | 8  |
| 4  | 387.1874  | 194.0974        |                |                  | 369.1769       | 185.0921         | L    | 1255.7481 | 628.3777        | 1238.7215      | 619.8644         |                |                  | 7  |
| 5  | 500.2715  | 250.6394        |                |                  | 482.2609       | 241.6341         | L    | 1142.6640 | 571.8357        | 1125.6375      | 563.3224         |                |                  | 6  |
| 6  | 571.3086  | 286.1579        |                |                  | 553.2980       | 277.1527         | A    | 1029.5800 | 515.2936        | 1012.5534      | 506.7803         |                |                  | 5  |
| 7  | 670.3770  | 335.6921        |                |                  | 652.3665       | 326.6869         | V    | 958.5429  | 479.7751        | 941.5163       | 471.2618         |                |                  | 4  |
| 8  | 769.4454  | 385.2264        |                |                  | 751.4349       | 376.2211         | V    | 859.4744  | 430.2409        | 842.4479       | 421.7276         |                |                  | 3  |
| 9  | 1354.7325 | 677.8699        | 1337.7060      | 669.3566         | 1336.7219      | 668.8646         | K    | 760.4060  | 380.7067        | 743.3795       | 372.1934         |                |                  | 2  |
| 10 |           |                 |                |                  |                |                  | R    | 175.1190  | 88.0631         | 158.0924       | 79.5498          |                |                  | 1  |

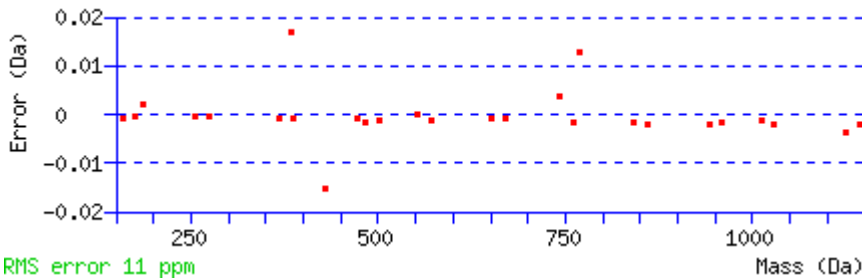

RMS error 11 ppm

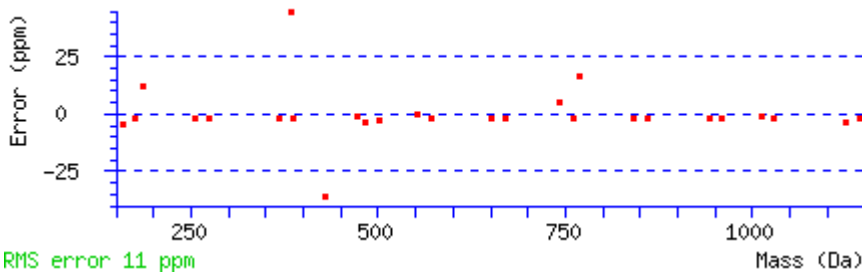

RMS error 11 ppm

IDENTIFICATION 31

MS/MS Fragmentation of **ARLQEKLSPPYSSPQFEFAQDVGR**

Found in **Q13263**, Transcription intermediary factor 1-beta OS=Homo sapiens GN=TRIM28 PE=1 SV=5

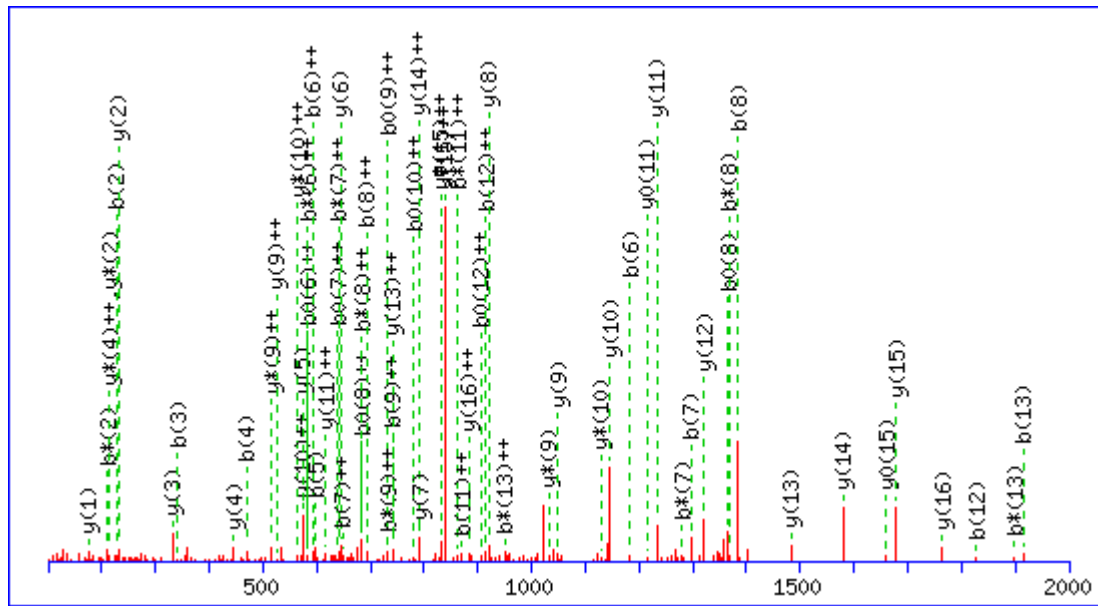

Monoisotopic mass of neutral peptide  $M_r(\text{calc})$ : 3059.5060 Variable modifications: K6 : Sumo 3 (K) Ions Score: 108  
 Expect: 5e-08

| #  | b         | b <sup>++</sup> | b <sup>*</sup> | b <sup>+++</sup> | b <sup>0</sup> | b <sup>0++</sup> | Seq. | y         | y <sup>++</sup> | y <sup>*</sup> | y <sup>+++</sup> | y <sup>0</sup> | y <sup>0++</sup> | #  |
|----|-----------|-----------------|----------------|------------------|----------------|------------------|------|-----------|-----------------|----------------|------------------|----------------|------------------|----|
| 1  | 72.0444   | 36.5258         |                |                  |                |                  | A    |           |                 |                |                  |                |                  | 23 |
| 2  | 228.1455  | 114.5764        | 211.1190       | 106.0631         |                |                  | R    | 2989.4762 | 1495.2418       | 2972.4497      | 1486.7285        | 2971.4657      | 1486.2365        | 22 |
| 3  | 341.2296  | 171.1184        | 324.2030       | 162.6051         |                |                  | L    | 2833.3751 | 1417.1912       | 2816.3486      | 1408.6779        | 2815.3646      | 1408.1859        | 21 |
| 4  | 469.2881  | 235.1477        | 452.2616       | 226.6344         |                |                  | Q    | 2720.2911 | 1360.6492       | 2703.2645      | 1352.1359        | 2702.2805      | 1351.6439        | 20 |
| 5  | 598.3307  | 299.6690        | 581.3042       | 291.1557         | 580.3202       | 290.6637         | E    | 2592.2325 | 1296.6199       | 2575.2059      | 1288.1066        | 2574.2219      | 1287.6146        | 19 |
| 6  | 1183.6178 | 592.3125        | 1166.5913      | 583.7993         | 1165.6072      | 583.3073         | K    | 2463.1899 | 1232.0986       | 2446.1633      | 1223.5853        | 2445.1793      | 1223.0933        | 18 |
| 7  | 1296.7019 | 648.8546        | 1279.6753      | 640.3413         | 1278.6913      | 639.8493         | L    | 1877.9028 | 939.4550        | 1860.8763      | 930.9418         | 1859.8923      | 930.4498         | 17 |
| 8  | 1383.7339 | 692.3706        | 1366.7074      | 683.8573         | 1365.7233      | 683.3653         | S    | 1764.8188 | 882.9130        | 1747.7922      | 874.3997         | 1746.8082      | 873.9077         | 16 |
| 9  | 1480.7867 | 740.8970        | 1463.7601      | 732.3837         | 1462.7761      | 731.8917         | P    | 1677.7867 | 839.3970        | 1660.7602      | 830.8837         | 1659.7762      | 830.3917         | 15 |
| 10 | 1577.8394 | 789.4234        | 1560.8129      | 780.9101         | 1559.8289      | 780.4181         | P    | 1580.7340 | 790.8706        | 1563.7074      | 782.3573         | 1562.7234      | 781.8653         | 14 |
| 11 | 1740.9028 | 870.9550        | 1723.8762      | 862.4417         | 1722.8922      | 861.9497         | Y    | 1483.6812 | 742.3442        | 1466.6547      | 733.8310         | 1465.6706      | 733.3390         | 13 |
| 12 | 1827.9348 | 914.4710        | 1810.9082      | 905.9578         | 1809.9242      | 905.4657         | S    | 1320.6179 | 660.8126        | 1303.5913      | 652.2993         | 1302.6073      | 651.8073         | 12 |
| 13 | 1914.9668 | 957.9870        | 1897.9403      | 949.4738         | 1896.9563      | 948.9818         | S    | 1233.5858 | 617.2966        | 1216.5593      | 608.7833         | 1215.5753      | 608.2913         | 11 |
| 14 | 2012.0196 | 1006.5134       | 1994.9930      | 998.0002         | 1994.0090      | 997.5081         | P    | 1146.5538 | 573.7805        | 1129.5273      | 565.2673         | 1128.5432      | 564.7753         | 10 |
| 15 | 2140.0782 | 1070.5427       | 2123.0516      | 1062.0294        | 2122.0676      | 1061.5374        | Q    | 1049.5011 | 525.2542        | 1032.4745      | 516.7409         | 1031.4905      | 516.2489         | 9  |
| 16 | 2269.1208 | 1135.0640       | 2252.0942      | 1126.5507        | 2251.1102      | 1126.0587        | E    | 921.4425  | 461.2249        | 904.4159       | 452.7116         | 903.4319       | 452.2196         | 8  |
| 17 | 2416.1892 | 1208.5982       | 2399.1626      | 1200.0849        | 2398.1786      | 1199.5929        | F    | 792.3999  | 396.7036        | 775.3733       | 388.1903         | 774.3893       | 387.6983         | 7  |
| 18 | 2487.2263 | 1244.1168       | 2470.1997      | 1235.6035        | 2469.2157      | 1235.1115        | A    | 645.3315  | 323.1694        | 628.3049       | 314.6561         | 627.3209       | 314.1641         | 6  |
| 19 | 2615.2849 | 1308.1461       | 2598.2583      | 1299.6328        | 2597.2743      | 1299.1408        | Q    | 574.2944  | 287.6508        | 557.2678       | 279.1375         | 556.2838       | 278.6455         | 5  |
| 20 | 2730.3118 | 1365.6595       | 2713.2853      | 1357.1463        | 2712.3012      | 1356.6543        | D    | 446.2358  | 223.6215        | 429.2092       | 215.1082         | 428.2252       | 214.6162         | 4  |
| 21 | 2829.3802 | 1415.1937       | 2812.3537      | 1406.6805        | 2811.3696      | 1406.1885        | V    | 331.2088  | 166.1081        | 314.1823       | 157.5948         |                |                  | 3  |
| 22 | 2886.4017 | 1443.7045       | 2869.3751      | 1435.1912        | 2868.3911      | 1434.6992        | G    | 232.1404  | 116.5738        | 215.1139       | 108.0606         |                |                  | 2  |
| 23 |           |                 |                |                  |                |                  | R    | 175.1190  | 88.0631         | 158.0924       | 79.5498          |                |                  | 1  |

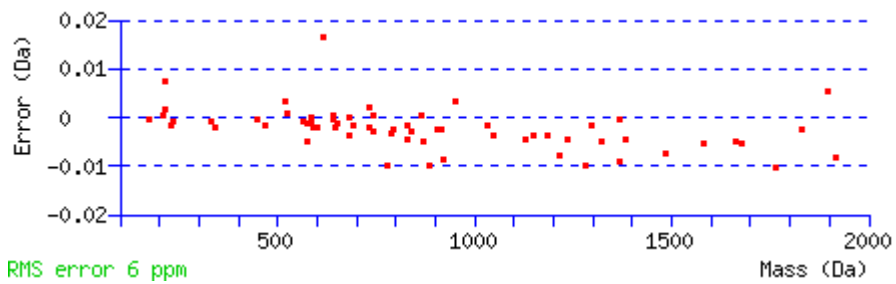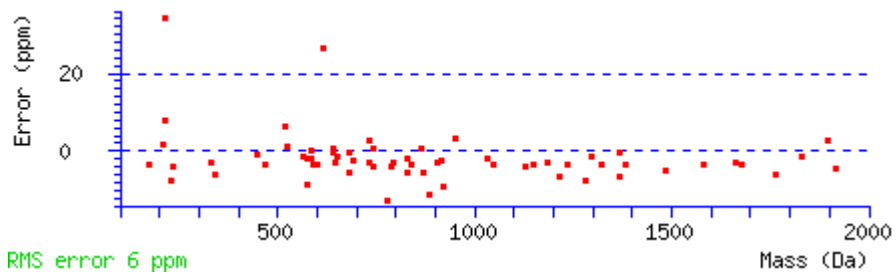

IDENTIFICATION 32

MS/MS Fragmentation of **EGVKTENDHNLK**

Found in **P55854**, Small ubiquitin-related modifier 3 OS=Homo sapiens GN=SUMO3 PE=1 SV=2

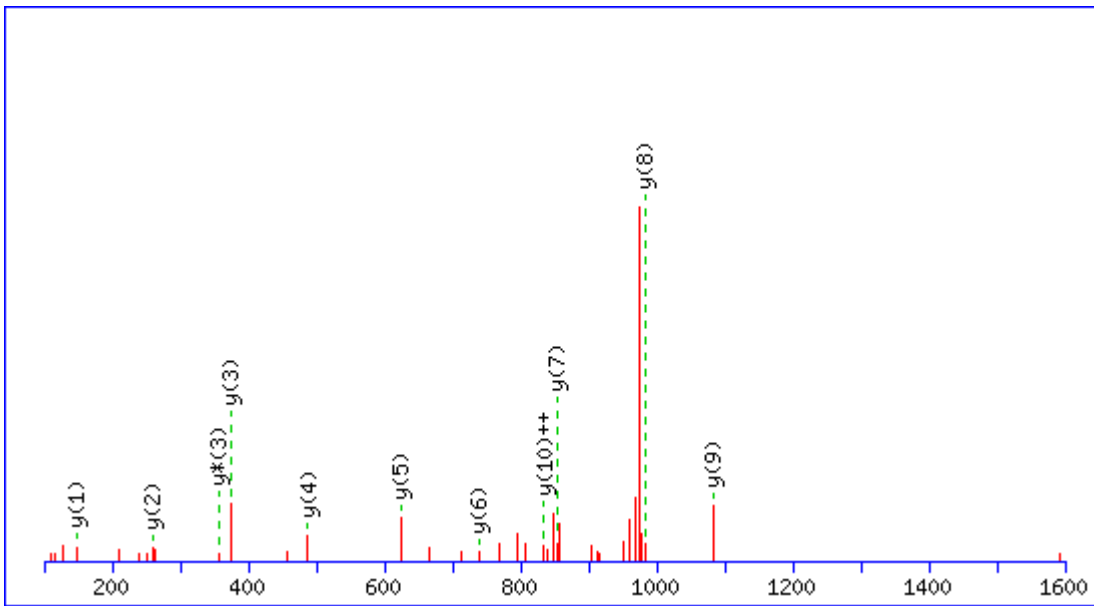

Monoisotopic mass of neutral peptide Mr(calc): 1952.9552

Variable modifications:

K4 : Sumo 3 (K)

Ions Score: 37 Expect: 0.34

| #  | b         | b <sup>++</sup> | b <sup>*</sup> | b <sup>+++</sup> | b <sup>0</sup> | b <sup>0++</sup> | Seq. | y         | y <sup>++</sup> | y <sup>*</sup> | y <sup>+++</sup> | y <sup>0</sup> | y <sup>0++</sup> | #  |
|----|-----------|-----------------|----------------|------------------|----------------|------------------|------|-----------|-----------------|----------------|------------------|----------------|------------------|----|
| 1  | 130.0499  | 65.5286         |                |                  | 112.0393       | 56.5233          | E    |           |                 |                |                  |                |                  | 13 |
| 2  | 187.0713  | 94.0393         |                |                  | 169.0608       | 85.0340          | G    | 1824.9199 | 912.9636        | 1807.8933      | 904.4503         | 1806.9093      | 903.9583         | 12 |
| 3  | 286.1397  | 143.5735        |                |                  | 268.1292       | 134.5682         | V    | 1767.8984 | 884.4528        | 1750.8719      | 875.9396         | 1749.8878      | 875.4476         | 11 |
| 4  | 871.4268  | 436.2170        | 854.4003       | 427.7038         | 853.4163       | 427.2118         | K    | 1668.8300 | 834.9186        | 1651.8034      | 826.4054         | 1650.8194      | 825.9133         | 10 |
| 5  | 972.4745  | 486.7409        | 955.4480       | 478.2276         | 954.4639       | 477.7356         | T    | 1083.5429 | 542.2751        | 1066.5164      | 533.7618         | 1065.5323      | 533.2698         | 9  |
| 6  | 1101.5171 | 551.2622        | 1084.4905      | 542.7489         | 1083.5065      | 542.2569         | E    | 982.4952  | 491.7513        | 965.4687       | 483.2380         | 964.4847       | 482.7460         | 8  |
| 7  | 1215.5600 | 608.2836        | 1198.5335      | 599.7704         | 1197.5495      | 599.2784         | N    | 853.4526  | 427.2300        | 836.4261       | 418.7167         | 835.4421       | 418.2247         | 7  |
| 8  | 1330.5870 | 665.7971        | 1313.5604      | 657.2838         | 1312.5764      | 656.7918         | D    | 739.4097  | 370.2085        | 722.3832       | 361.6952         | 721.3991       | 361.2032         | 6  |
| 9  | 1467.6459 | 734.3266        | 1450.6193      | 725.8133         | 1449.6353      | 725.3213         | H    | 624.3828  | 312.6950        | 607.3562       | 304.1817         |                |                  | 5  |
| 10 | 1580.7299 | 790.8686        | 1563.7034      | 782.3553         | 1562.7194      | 781.8633         | I    | 487.3239  | 244.1656        | 470.2973       | 235.6523         |                |                  | 4  |
| 11 | 1694.7729 | 847.8901        | 1677.7463      | 839.3768         | 1676.7623      | 838.8848         | N    | 374.2398  | 187.6235        | 357.2132       | 179.1103         |                |                  | 3  |
| 12 | 1807.8569 | 904.4321        | 1790.8304      | 895.9188         | 1789.8464      | 895.4268         | L    | 260.1969  | 130.6021        | 243.1703       | 122.0888         |                |                  | 2  |
| 13 |           |                 |                |                  |                |                  | K    | 147.1128  | 74.0600         | 130.0863       | 65.5468          |                |                  | 1  |



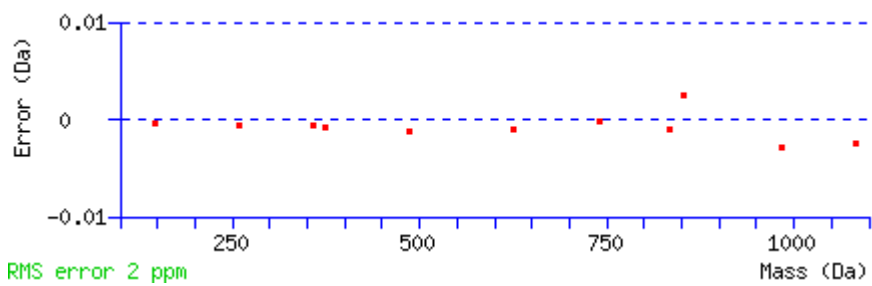

RMS error 2 ppm

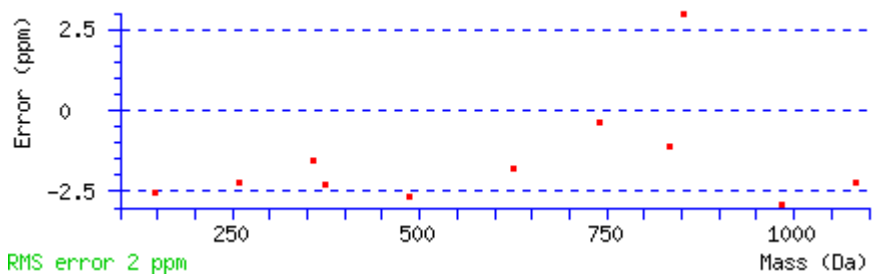

RMS error 2 ppm

IDENTIFICATION 33

MS/MS Fragmentation of **EGVKTENDHNLK**

Found in **P55854**, Small ubiquitin-related modifier 3 OS=Homo sapiens GN=SUMO3 PE=1 SV=2

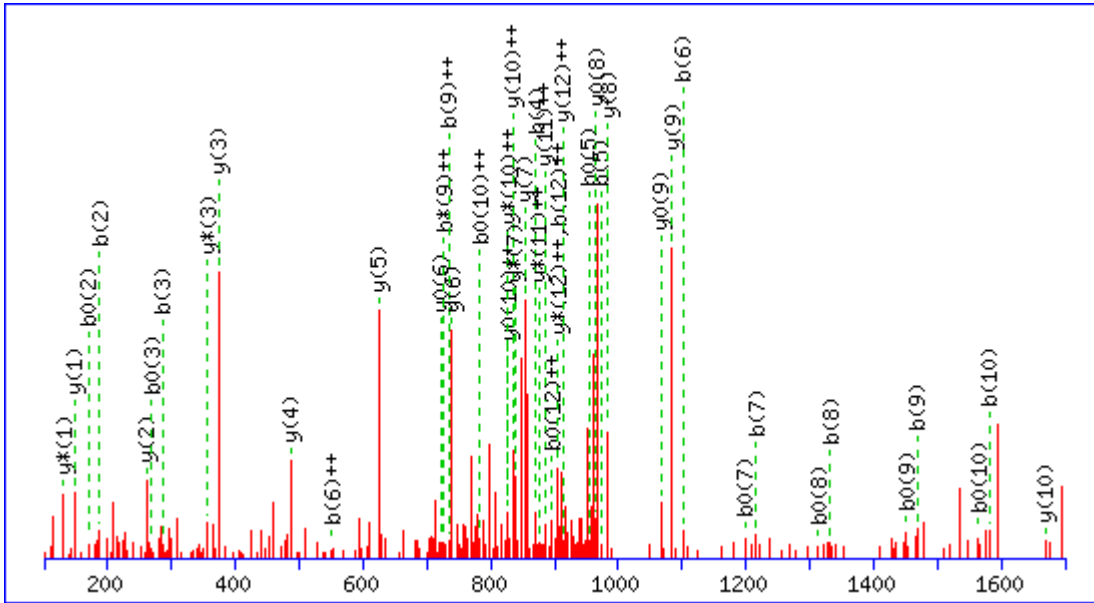

Monoisotopic mass of neutral peptide  $M_r(\text{calc})$ : 1953.9392

Variable modifications:

K4 : Sumo 3 (K)

N7 : Deamidated (NQ)

Ions Score: 59 Expect: 0.0023

| #  | b         | b <sup>++</sup> | b <sup>*</sup> | b <sup>+++</sup> | b <sup>0</sup> | b <sup>0++</sup> | Seq. | y         | y <sup>++</sup> | y <sup>*</sup> | y <sup>+++</sup> | y <sup>0</sup> | y <sup>0++</sup> | #  |
|----|-----------|-----------------|----------------|------------------|----------------|------------------|------|-----------|-----------------|----------------|------------------|----------------|------------------|----|
| 1  | 130.0499  | 65.5286         |                |                  | 112.0393       | 56.5233          | E    |           |                 |                |                  |                |                  | 13 |
| 2  | 187.0713  | 94.0393         |                |                  | 169.0608       | 85.0340          | G    | 1825.9039 | 913.4556        | 1808.8773      | 904.9423         | 1807.8933      | 904.4503         | 12 |
| 3  | 286.1397  | 143.5735        |                |                  | 268.1292       | 134.5682         | V    | 1768.8824 | 884.9448        | 1751.8559      | 876.4316         | 1750.8719      | 875.9396         | 11 |
| 4  | 871.4268  | 436.2170        | 854.4003       | 427.7038         | 853.4163       | 427.2118         | K    | 1669.8140 | 835.4106        | 1652.7875      | 826.8974         | 1651.8034      | 826.4054         | 10 |
| 5  | 972.4745  | 486.7409        | 955.4480       | 478.2276         | 954.4639       | 477.7356         | T    | 1084.5269 | 542.7671        | 1067.5004      | 534.2538         | 1066.5164      | 533.7618         | 9  |
| 6  | 1101.5171 | 551.2622        | 1084.4905      | 542.7489         | 1083.5065      | 542.2569         | E    | 983.4793  | 492.2433        | 966.4527       | 483.7300         | 965.4687       | 483.2380         | 8  |
| 7  | 1216.5440 | 608.7757        | 1199.5175      | 600.2624         | 1198.5335      | 599.7704         | N    | 854.4367  | 427.7220        | 837.4101       | 419.2087         | 836.4261       | 418.7167         | 7  |
| 8  | 1331.5710 | 666.2891        | 1314.5444      | 657.7759         | 1313.5604      | 657.2838         | D    | 739.4097  | 370.2085        | 722.3832       | 361.6952         | 721.3991       | 361.2032         | 6  |
| 9  | 1468.6299 | 734.8186        | 1451.6033      | 726.3053         | 1450.6193      | 725.8133         | H    | 624.3828  | 312.6950        | 607.3562       | 304.1817         |                |                  | 5  |
| 10 | 1581.7140 | 791.3606        | 1564.6874      | 782.8473         | 1563.7034      | 782.3553         | I    | 487.3239  | 244.1656        | 470.2973       | 235.6523         |                |                  | 4  |
| 11 | 1695.7569 | 848.3821        | 1678.7303      | 839.8688         | 1677.7463      | 839.3768         | N    | 374.2398  | 187.6235        | 357.2132       | 179.1103         |                |                  | 3  |
| 12 | 1808.8409 | 904.9241        | 1791.8144      | 896.4108         | 1790.8304      | 895.9188         | L    | 260.1969  | 130.6021        | 243.1703       | 122.0888         |                |                  | 2  |
| 13 |           |                 |                |                  |                |                  | K    | 147.1128  | 74.0600         | 130.0863       | 65.5468          |                |                  | 1  |

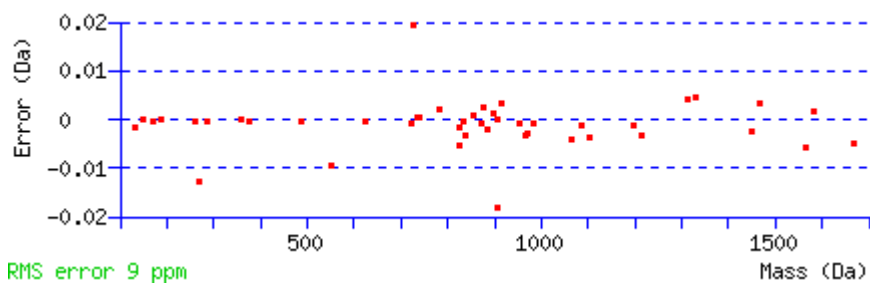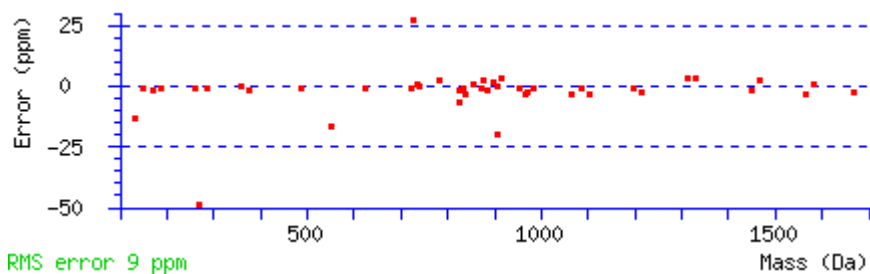

IDENTIFICATION 34

MS/MS Fragmentation of **GKYKEETIEK**

Found in **P61254**, 60S ribosomal protein L26 OS=Homo sapiens GN=RPL26 PE=1 SV=1

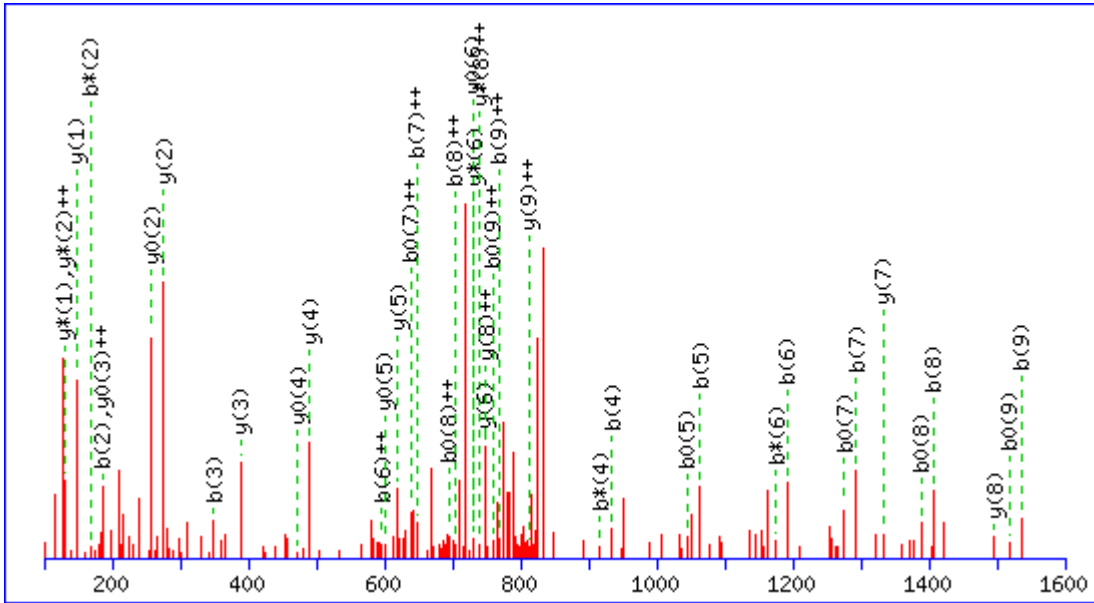

Monoisotopic mass of neutral peptide  $M_r(\text{calc})$ : 1680.8318 Variable modifications: K4 : Sumo 3 (K) Ions Score: 39 Expect: 0.14

| #  | b         | b <sup>++</sup> | b <sup>*</sup> | b <sup>+++</sup> | b <sup>0</sup> | b <sup>0++</sup> | Seq. | y         | y <sup>++</sup> | y <sup>*</sup> | y <sup>+++</sup> | y <sup>0</sup> | y <sup>0++</sup> | #  |
|----|-----------|-----------------|----------------|------------------|----------------|------------------|------|-----------|-----------------|----------------|------------------|----------------|------------------|----|
| 1  | 58.0287   | 29.5180         |                |                  |                |                  | G    |           |                 |                |                  |                |                  | 10 |
| 2  | 186.1237  | 93.5655         | 169.0972       | 85.0522          |                |                  | K    | 1624.8177 | 812.9125        | 1607.7911      | 804.3992         | 1606.8071      | 803.9072         | 9  |
| 3  | 349.1870  | 175.0972        | 332.1605       | 166.5839         |                |                  | Y    | 1496.7227 | 748.8650        | 1479.6962      | 740.3517         | 1478.7122      | 739.8597         | 8  |
| 4  | 934.4741  | 467.7407        | 917.4476       | 459.2274         |                |                  | K    | 1333.6594 | 667.3333        | 1316.6329      | 658.8201         | 1315.6488      | 658.3281         | 7  |
| 5  | 1063.5167 | 532.2620        | 1046.4902      | 523.7487         | 1045.5061      | 523.2567         | E    | 748.3723  | 374.6898        | 731.3458       | 366.1765         | 730.3618       | 365.6845         | 6  |
| 6  | 1192.5593 | 596.7833        | 1175.5327      | 588.2700         | 1174.5487      | 587.7780         | E    | 619.3297  | 310.1685        | 602.3032       | 301.6552         | 601.3192       | 301.1632         | 5  |
| 7  | 1293.6070 | 647.3071        | 1276.5804      | 638.7938         | 1275.5964      | 638.3018         | T    | 490.2871  | 245.6472        | 473.2606       | 237.1339         | 472.2766       | 236.6419         | 4  |
| 8  | 1406.6910 | 703.8492        | 1389.6645      | 695.3359         | 1388.6805      | 694.8439         | I    | 389.2395  | 195.1234        | 372.2129       | 186.6101         | 371.2289       | 186.1181         | 3  |
| 9  | 1535.7336 | 768.3705        | 1518.7071      | 759.8572         | 1517.7231      | 759.3652         | E    | 276.1554  | 138.5813        | 259.1288       | 130.0681         | 258.1448       | 129.5761         | 2  |
| 10 |           |                 |                |                  |                |                  | K    | 147.1128  | 74.0600         | 130.0863       | 65.5468          |                |                  | 1  |

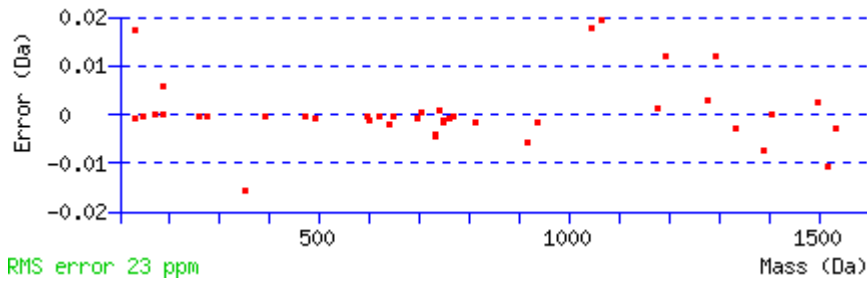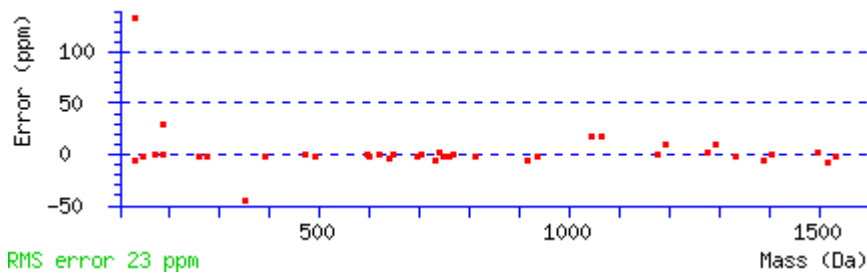

IDENTIFICATION 35

MS/MS Fragmentation of

GPSSVEDIKAK

Found in P06748, Nucleophosmin OS=Homo sapiens GN=NPM1 PE=1 SV=2

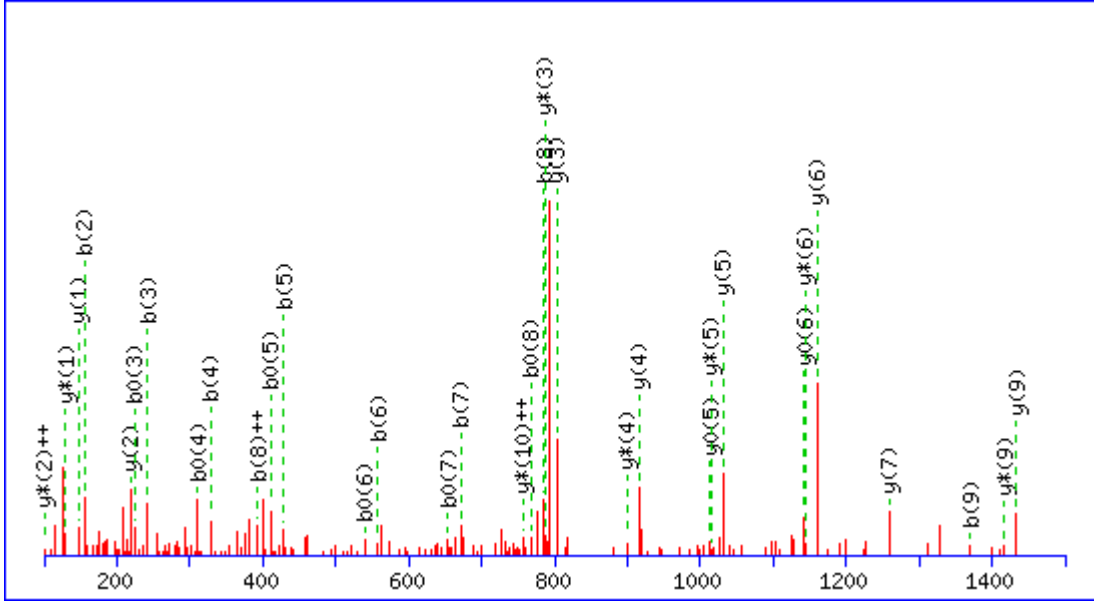

Monoisotopic mass of neutral peptide Mr(calc): 1586.7900

Variable modifications:

K9 : Sumo 3 (K)

Ions Score: 50 Expect: 0.013

| #  | b         | b <sup>++</sup> | b <sup>*</sup> | b <sup>+++</sup> | b <sup>0</sup> | b <sup>0++</sup> | Seq. | y         | y <sup>++</sup> | y <sup>*</sup> | y <sup>+++</sup> | y <sup>0</sup> | y <sup>0++</sup> | #  |
|----|-----------|-----------------|----------------|------------------|----------------|------------------|------|-----------|-----------------|----------------|------------------|----------------|------------------|----|
| 1  | 58.0287   | 29.5180         |                |                  |                |                  | G    |           |                 |                |                  |                |                  | 11 |
| 2  | 155.0815  | 78.0444         |                |                  |                |                  | P    | 1530.7758 | 765.8916        | 1513.7493      | 757.3783         | 1512.7653      | 756.8863         | 10 |
| 3  | 242.1135  | 121.5604        |                |                  | 224.1030       | 112.5551         | S    | 1433.7231 | 717.3652        | 1416.6965      | 708.8519         | 1415.7125      | 708.3599         | 9  |
| 4  | 329.1456  | 165.0764        |                |                  | 311.1350       | 156.0711         | S    | 1346.6910 | 673.8492        | 1329.6645      | 665.3359         | 1328.6805      | 664.8439         | 8  |
| 5  | 428.2140  | 214.6106        |                |                  | 410.2034       | 205.6053         | V    | 1259.6590 | 630.3331        | 1242.6325      | 621.8199         | 1241.6484      | 621.3279         | 7  |
| 6  | 557.2566  | 279.1319        |                |                  | 539.2460       | 270.1266         | E    | 1160.5906 | 580.7989        | 1143.5640      | 572.2857         | 1142.5800      | 571.7937         | 6  |
| 7  | 672.2835  | 336.6454        |                |                  | 654.2729       | 327.6401         | D    | 1031.5480 | 516.2776        | 1014.5215      | 507.7644         | 1013.5374      | 507.2724         | 5  |
| 8  | 785.3676  | 393.1874        |                |                  | 767.3570       | 384.1821         | I    | 916.5211  | 458.7642        | 899.4945       | 450.2509         |                |                  | 4  |
| 9  | 1370.6546 | 685.8310        | 1353.6281      | 677.3177         | 1352.6441      | 676.8257         | K    | 803.4370  | 402.2221        | 786.4104       | 393.7089         |                |                  | 3  |
| 10 | 1441.6918 | 721.3495        | 1424.6652      | 712.8362         | 1423.6812      | 712.3442         | A    | 218.1499  | 109.5786        | 201.1234       | 101.0653         |                |                  | 2  |
| 11 |           |                 |                |                  |                |                  | K    | 147.1128  | 74.0600         | 130.0863       | 65.5468          |                |                  | 1  |

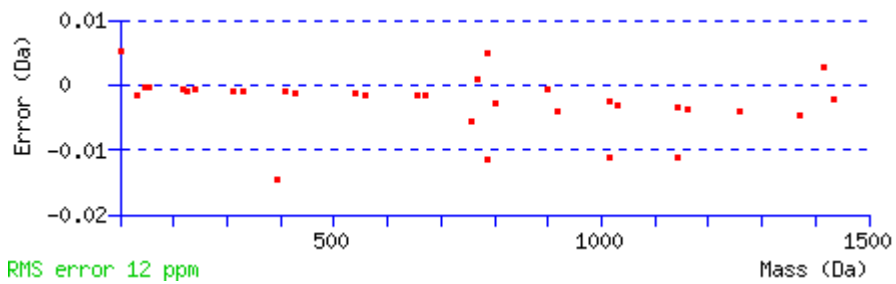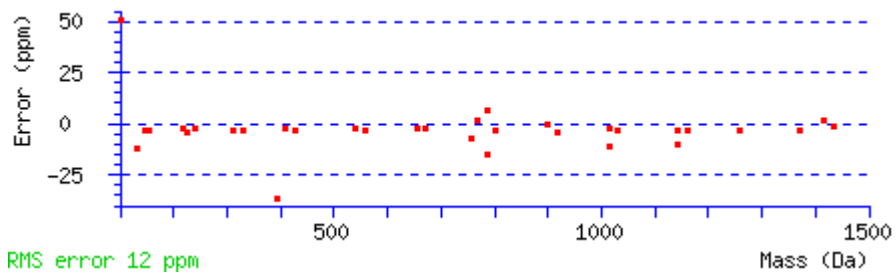

MS/MS Fragmentation of **HLSGRPLKVKEDPDGEHAR**Found in **P52272**, Heterogeneous nuclear ribonucleoprotein M OS=Homo sapiens GN=HNRNPM PE=1 SV=3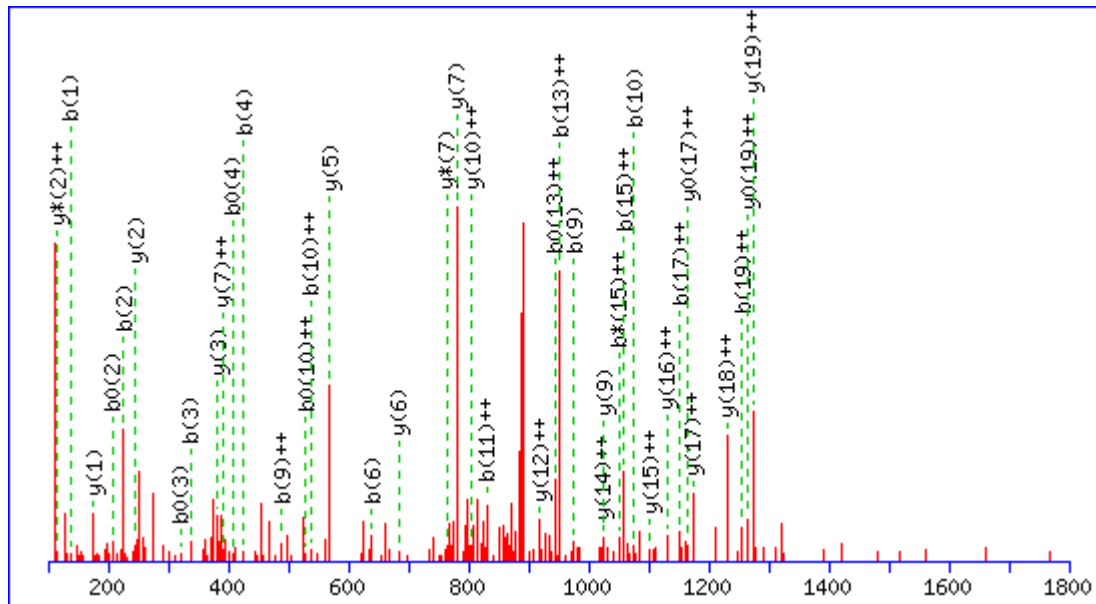Monoisotopic mass of neutral peptide  $M_r(\text{calc})$ : 2684.3379

Variable modifications:

K11 : Sumo 3 (K)

Ions Score: 16 Expect: 51

| #  | b         | b <sup>++</sup> | b <sup>*</sup> | b <sup>+++</sup> | b <sup>0</sup> | b <sup>0++</sup> | Seq. | y         | y <sup>++</sup> | y <sup>*</sup> | y <sup>*++</sup> | y <sup>0</sup> | y <sup>0++</sup> | #  |
|----|-----------|-----------------|----------------|------------------|----------------|------------------|------|-----------|-----------------|----------------|------------------|----------------|------------------|----|
| 1  | 138.0662  | 69.5367         |                |                  |                |                  | H    |           |                 |                |                  |                |                  | 20 |
| 2  | 225.0982  | 113.0527        |                |                  | 207.0877       | 104.0475         | S    | 2548.2863 | 1274.6468       | 2531.2597      | 1266.1335        | 2530.2757      | 1265.6415        | 19 |
| 3  | 338.1823  | 169.5948        |                |                  | 320.1717       | 160.5895         | L    | 2461.2542 | 1231.1307       | 2444.2277      | 1222.6175        | 2443.2437      | 1222.1255        | 18 |
| 4  | 425.2143  | 213.1108        |                |                  | 407.2037       | 204.1055         | S    | 2348.1702 | 1174.5887       | 2331.1436      | 1166.0754        | 2330.1596      | 1165.5834        | 17 |
| 5  | 482.2358  | 241.6215        |                |                  | 464.2252       | 232.6162         | G    | 2261.1381 | 1131.0727       | 2244.1116      | 1122.5594        | 2243.1276      | 1122.0674        | 16 |
| 6  | 638.3369  | 319.6721        | 621.3103       | 311.1588         | 620.3263       | 310.6668         | R    | 2204.1167 | 1102.5620       | 2187.0901      | 1094.0487        | 2186.1061      | 1093.5567        | 15 |
| 7  | 735.3896  | 368.1985        | 718.3631       | 359.6852         | 717.3791       | 359.1932         | P    | 2048.0156 | 1024.5114       | 2030.9890      | 1015.9981        | 2030.0050      | 1015.5061        | 14 |
| 8  | 848.4737  | 424.7405        | 831.4472       | 416.2272         | 830.4631       | 415.7352         | L    | 1950.9628 | 975.9850        | 1933.9362      | 967.4718         | 1932.9522      | 966.9798         | 13 |
| 9  | 976.5687  | 488.7880        | 959.5421       | 480.2747         | 958.5581       | 479.7827         | K    | 1837.8787 | 919.4430        | 1820.8522      | 910.9297         | 1819.8682      | 910.4377         | 12 |
| 10 | 1075.6371 | 538.3222        | 1058.6105      | 529.8089         | 1057.6265      | 529.3169         | V    | 1709.7838 | 855.3955        | 1692.7572      | 846.8822         | 1691.7732      | 846.3902         | 11 |
| 11 | 1660.9242 | 830.9657        | 1643.8976      | 822.4524         | 1642.9136      | 821.9604         | K    | 1610.7154 | 805.8613        | 1593.6888      | 797.3480         | 1592.7048      | 796.8560         | 10 |
| 12 | 1789.9668 | 895.4870        | 1772.9402      | 886.9737         | 1771.9562      | 886.4817         | E    | 1025.4283 | 513.2178        | 1008.4017      | 504.7045         | 1007.4177      | 504.2125         | 9  |
| 13 | 1904.9937 | 953.0005        | 1887.9671      | 944.4872         | 1886.9831      | 943.9952         | D    | 896.3857  | 448.6965        | 879.3591       | 440.1832         | 878.3751       | 439.6912         | 8  |
| 14 | 2002.0465 | 1001.5269       | 1985.0199      | 993.0136         | 1984.0359      | 992.5216         | P    | 781.3587  | 391.1830        | 764.3322       | 382.6697         | 763.3482       | 382.1777         | 7  |
| 15 | 2117.0734 | 1059.0403       | 2100.0469      | 1050.5271        | 2099.0628      | 1050.0351        | D    | 684.3060  | 342.6566        | 667.2794       | 334.1434         | 666.2954       | 333.6513         | 6  |
| 16 | 2174.0949 | 1087.5511       | 2157.0683      | 1079.0378        | 2156.0843      | 1078.5458        | G    | 569.2790  | 285.1432        | 552.2525       | 276.6299         | 551.2685       | 276.1379         | 5  |
| 17 | 2303.1375 | 1152.0724       | 2286.1109      | 1143.5591        | 2285.1269      | 1143.0671        | E    | 512.2576  | 256.6324        | 495.2310       | 248.1191         | 494.2470       | 247.6271         | 4  |
| 18 | 2440.1964 | 1220.6018       | 2423.1698      | 1212.0886        | 2422.1858      | 1211.5965        | H    | 383.2150  | 192.1111        | 366.1884       | 183.5979         |                |                  | 3  |
| 19 | 2511.2335 | 1256.1204       | 2494.2069      | 1247.6071        | 2493.2229      | 1247.1151        | A    | 246.1561  | 123.5817        | 229.1295       | 115.0684         |                |                  | 2  |
| 20 |           |                 |                |                  |                |                  | R    | 175.1190  | 88.0631         | 158.0924       | 79.5498          |                |                  | 1  |

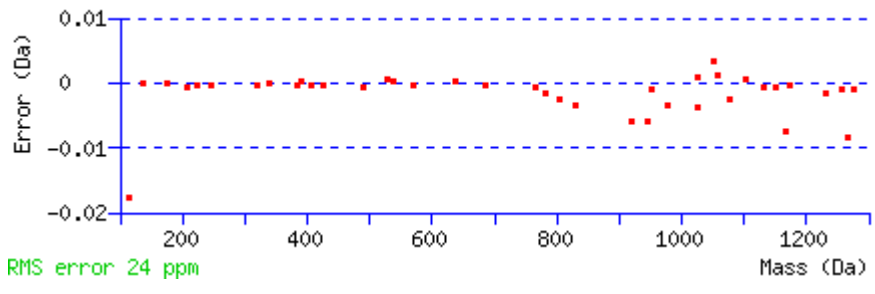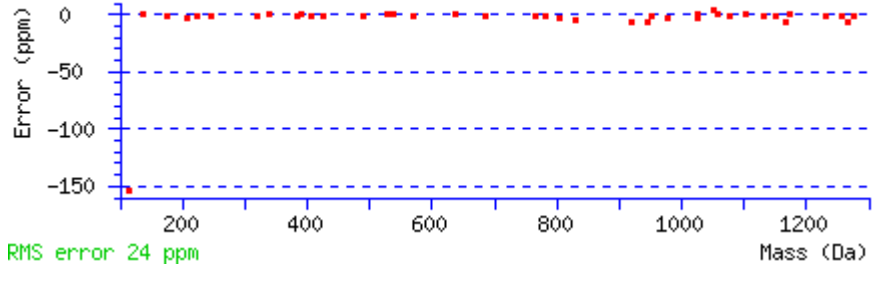



IDENTIFICATION 37

MS/MS Fragmentation of **HTPLSKLMK**

Found in **P61956**, Small ubiquitin-related modifier 2 OS=Homo sapiens GN=SUMO2 PE=1 SV=3

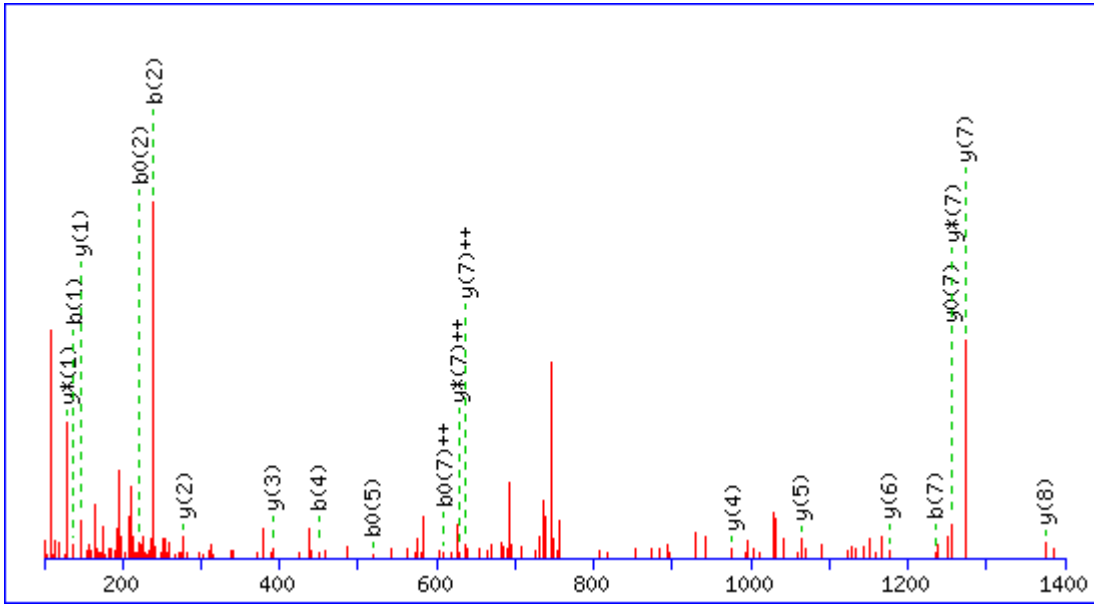

Monoisotopic mass of neutral peptide  $M_r(\text{calc})$ : 1510.7926 Variable modifications: K6 : Sumo 3 (K) Ions Score: 16 Expect: 14

| # | b         | b <sup>++</sup> | b <sup>*</sup> | b <sup>+++</sup> | b <sup>0</sup> | b <sup>0++</sup> | Seq. | y         | y <sup>++</sup> | y <sup>*</sup> | y <sup>+++</sup> | y <sup>0</sup> | y <sup>0++</sup> | # |
|---|-----------|-----------------|----------------|------------------|----------------|------------------|------|-----------|-----------------|----------------|------------------|----------------|------------------|---|
| 1 | 138.0662  | 69.5367         |                |                  |                |                  | H    |           |                 |                |                  |                |                  | 9 |
| 2 | 239.1139  | 120.0606        |                |                  | 221.1033       | 111.0553         | T    | 1374.7410 | 687.8741        | 1357.7144      | 679.3608         | 1356.7304      | 678.8688         | 8 |
| 3 | 336.1666  | 168.5870        |                |                  | 318.1561       | 159.5817         | P    | 1273.6933 | 637.3503        | 1256.6667      | 628.8370         | 1255.6827      | 628.3450         | 7 |
| 4 | 449.2507  | 225.1290        |                |                  | 431.2401       | 216.1237         | L    | 1176.6405 | 588.8239        | 1159.6140      | 580.3106         | 1158.6300      | 579.8186         | 6 |
| 5 | 536.2827  | 268.6450        |                |                  | 518.2722       | 259.6397         | S    | 1063.5565 | 532.2819        | 1046.5299      | 523.7686         | 1045.5459      | 523.2766         | 5 |
| 6 | 1121.5698 | 561.2885        | 1104.5432      | 552.7753         | 1103.5592      | 552.2833         | K    | 976.5244  | 488.7659        | 959.4979       | 480.2526         |                |                  | 4 |
| 7 | 1234.6539 | 617.8306        | 1217.6273      | 609.3173         | 1216.6433      | 608.8253         | L    | 391.2374  | 196.1223        | 374.2108       | 187.6090         |                |                  | 3 |
| 8 | 1365.6943 | 683.3508        | 1348.6678      | 674.8375         | 1347.6838      | 674.3455         | M    | 278.1533  | 139.5803        | 261.1267       | 131.0670         |                |                  | 2 |
| 9 |           |                 |                |                  |                |                  | K    | 147.1128  | 74.0600         | 130.0863       | 65.5468          |                |                  | 1 |

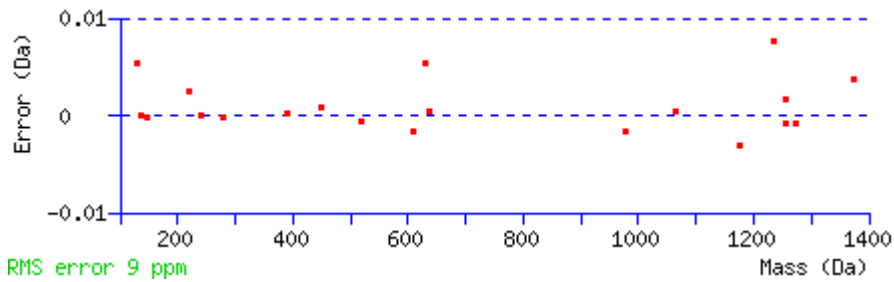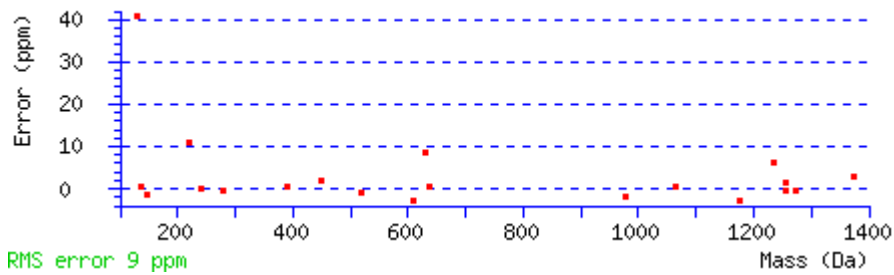

IDENTIFICATION 38

MS/MS Fragmentation of **LLVHMGLLKSEDKVK**

Found in **P46060**, Ran GTPase-activating protein 1 OS=Homo sapiens GN=RANGAP1 PE=1 SV=1

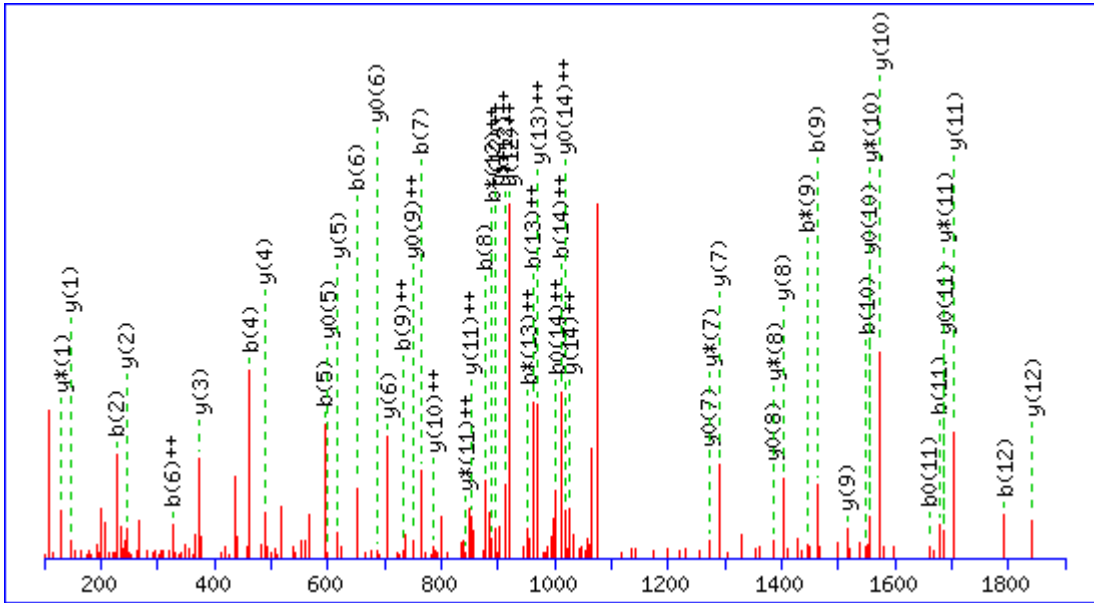

Monoisotopic mass of neutral peptide  $M_r(\text{calc})$ : 2166.1830

Variable modifications:

K9 : Sumo 3 (K)

Ions Score: 66 Expect: 7.2e-05

| #  | b         | b <sup>++</sup> | b <sup>*</sup> | b <sup>+++</sup> | b <sup>0</sup> | b <sup>0++</sup> | Seq. | y         | y <sup>++</sup> | y <sup>*</sup> | y <sup>+++</sup> | y <sup>0</sup> | y <sup>0++</sup> | #  |
|----|-----------|-----------------|----------------|------------------|----------------|------------------|------|-----------|-----------------|----------------|------------------|----------------|------------------|----|
| 1  | 114.0913  | 57.5493         |                |                  |                |                  | L    |           |                 |                |                  |                |                  | 15 |
| 2  | 227.1754  | 114.0913        |                |                  |                |                  | L    | 2054.1063 | 1027.5568       | 2037.0797      | 1019.0435        | 2036.0957      | 1018.5515        | 14 |
| 3  | 326.2438  | 163.6255        |                |                  |                |                  | V    | 1941.0222 | 971.0147        | 1923.9957      | 962.5015         | 1923.0117      | 962.0095         | 13 |
| 4  | 463.3027  | 232.1550        |                |                  |                |                  | H    | 1841.9538 | 921.4805        | 1824.9273      | 912.9673         | 1823.9432      | 912.4753         | 12 |
| 5  | 594.3432  | 297.6752        |                |                  |                |                  | M    | 1704.8949 | 852.9511        | 1687.8683      | 844.4378         | 1686.8843      | 843.9458         | 11 |
| 6  | 651.3647  | 326.1860        |                |                  |                |                  | G    | 1573.8544 | 787.4308        | 1556.8279      | 778.9176         | 1555.8438      | 778.4256         | 10 |
| 7  | 764.4487  | 382.7280        |                |                  |                |                  | L    | 1516.8329 | 758.9201        | 1499.8064      | 750.4068         | 1498.8224      | 749.9148         | 9  |
| 8  | 877.5328  | 439.2700        |                |                  |                |                  | L    | 1403.7489 | 702.3781        | 1386.7223      | 693.8648         | 1385.7383      | 693.3728         | 8  |
| 9  | 1462.8199 | 731.9136        | 1445.7933      | 723.4003         |                |                  | K    | 1290.6648 | 645.8360        | 1273.6383      | 637.3228         | 1272.6543      | 636.8308         | 7  |
| 10 | 1549.8519 | 775.4296        | 1532.8254      | 766.9163         | 1531.8413      | 766.4243         | S    | 705.3777  | 353.1925        | 688.3512       | 344.6792         | 687.3672       | 344.1872         | 6  |
| 11 | 1678.8945 | 839.9509        | 1661.8680      | 831.4376         | 1660.8839      | 830.9456         | E    | 618.3457  | 309.6765        | 601.3192       | 301.1632         | 600.3352       | 300.6712         | 5  |
| 12 | 1793.9214 | 897.4644        | 1776.8949      | 888.9511         | 1775.9109      | 888.4591         | D    | 489.3031  | 245.1552        | 472.2766       | 236.6419         | 471.2926       | 236.1499         | 4  |
| 13 | 1922.0164 | 961.5118        | 1904.9899      | 952.9986         | 1904.0058      | 952.5066         | K    | 374.2762  | 187.6417        | 357.2496       | 179.1285         |                |                  | 3  |
| 14 | 2021.0848 | 1011.0460       | 2004.0583      | 1002.5328        | 2003.0743      | 1002.0408        | V    | 246.1812  | 123.5942        | 229.1547       | 115.0810         |                |                  | 2  |
| 15 |           |                 |                |                  |                |                  | K    | 147.1128  | 74.0600         | 130.0863       | 65.5468          |                |                  | 1  |

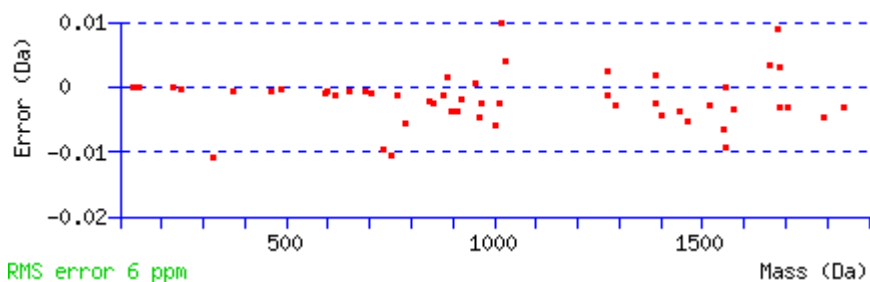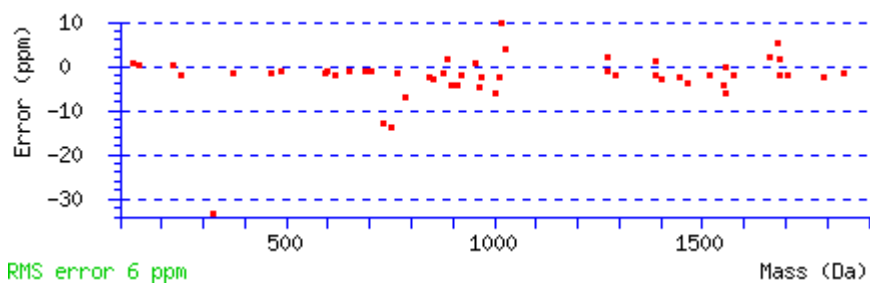

IDENTIFICATION 39

MS/MS Fragmentation of **LQEKLSPPYSSPQEFAQDVGR**

Found in **Q13263**, Transcription intermediary factor 1-beta OS=Homo sapiens GN=TRIM28 PE=1 SV=5

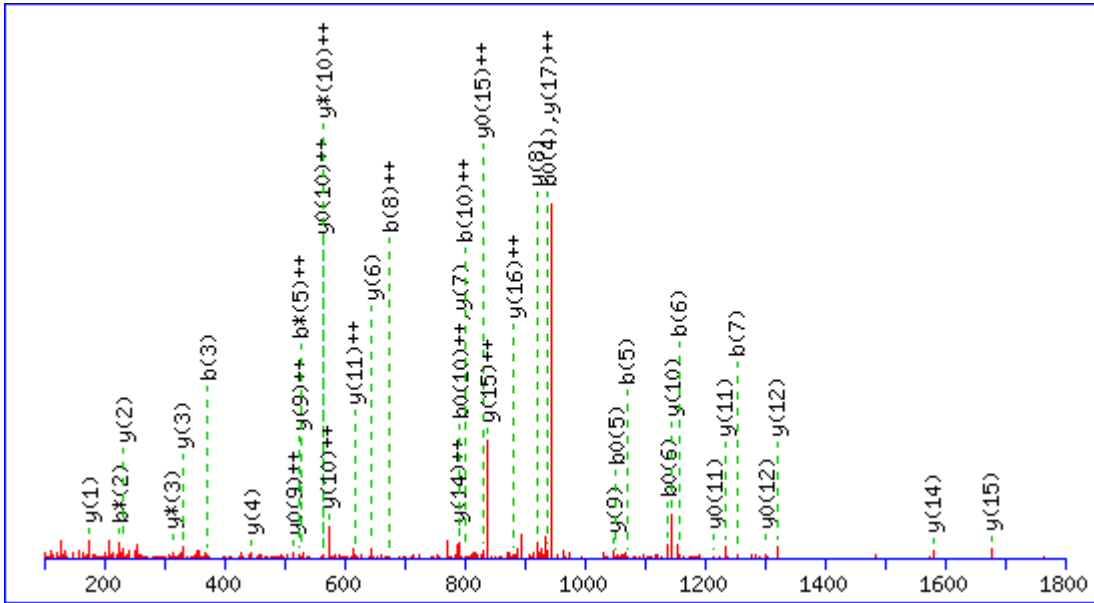

Monoisotopic mass of neutral peptide  $M_r(\text{calc})$ : 2833.3518

Variable modifications:

Q2 : Deamidated (NQ)

K4 : Sumo 3 (K)

Ions Score: 55 Expect: 0.012

| #  | b         | b <sup>++</sup> | b <sup>*</sup> | b <sup>+++</sup> | b <sup>0</sup> | b <sup>0++</sup> | Seq. | y         | y <sup>++</sup> | y <sup>*</sup> | y <sup>+++</sup> | y <sup>0</sup> | y <sup>0++</sup> | #  |
|----|-----------|-----------------|----------------|------------------|----------------|------------------|------|-----------|-----------------|----------------|------------------|----------------|------------------|----|
| 1  | 114.0913  | 57.5493         |                |                  |                |                  | L    |           |                 |                |                  |                |                  | 21 |
| 2  | 243.1339  | 122.0706        | 226.1074       | 113.5573         |                |                  | Q    | 2721.2751 | 1361.1412       | 2704.2485      | 1352.6279        | 2703.2645      | 1352.1359        | 20 |
| 3  | 372.1765  | 186.5919        | 355.1500       | 178.0786         | 354.1660       | 177.5866         | E    | 2592.2325 | 1296.6199       | 2575.2059      | 1288.1066        | 2574.2219      | 1287.6146        | 19 |
| 4  | 957.4636  | 479.2354        | 940.4371       | 470.7222         | 939.4530       | 470.2302         | K    | 2463.1899 | 1232.0986       | 2446.1633      | 1223.5853        | 2445.1793      | 1223.0933        | 18 |
| 5  | 1070.5477 | 535.7775        | 1053.5211      | 527.2642         | 1052.5371      | 526.7722         | L    | 1877.9028 | 939.4550        | 1860.8763      | 930.9418         | 1859.8923      | 930.4498         | 17 |
| 6  | 1157.5797 | 579.2935        | 1140.5531      | 570.7802         | 1139.5691      | 570.2882         | S    | 1764.8188 | 882.9130        | 1747.7922      | 874.3997         | 1746.8082      | 873.9077         | 16 |
| 7  | 1254.6325 | 627.8199        | 1237.6059      | 619.3066         | 1236.6219      | 618.8146         | P    | 1677.7867 | 839.3970        | 1660.7602      | 830.8837         | 1659.7762      | 830.3917         | 15 |
| 8  | 1351.6852 | 676.3462        | 1334.6587      | 667.8330         | 1333.6747      | 667.3410         | P    | 1580.7340 | 790.8706        | 1563.7074      | 782.3573         | 1562.7234      | 781.8653         | 14 |
| 9  | 1514.7486 | 757.8779        | 1497.7220      | 749.3646         | 1496.7380      | 748.8726         | Y    | 1483.6812 | 742.3442        | 1466.6547      | 733.8310         | 1465.6706      | 733.3390         | 13 |
| 10 | 1601.7806 | 801.3939        | 1584.7540      | 792.8807         | 1583.7700      | 792.3886         | S    | 1320.6179 | 660.8126        | 1303.5913      | 652.2993         | 1302.6073      | 651.8073         | 12 |
| 11 | 1688.8126 | 844.9099        | 1671.7861      | 836.3967         | 1670.8020      | 835.9047         | S    | 1233.5858 | 617.2966        | 1216.5593      | 608.7833         | 1215.5753      | 608.2913         | 11 |
| 12 | 1785.8654 | 893.4363        | 1768.8388      | 884.9230         | 1767.8548      | 884.4310         | P    | 1146.5538 | 573.7805        | 1129.5273      | 565.2673         | 1128.5432      | 564.7753         | 10 |
| 13 | 1913.9239 | 957.4656        | 1896.8974      | 948.9523         | 1895.9134      | 948.4603         | Q    | 1049.5010 | 525.2542        | 1032.4745      | 516.7409         | 1031.4905      | 516.2489         | 9  |
| 14 | 2042.9665 | 1021.9869       | 2025.9400      | 1013.4736        | 2024.9560      | 1012.9816        | E    | 921.4425  | 461.2249        | 904.4159       | 452.7116         | 903.4319       | 452.2196         | 8  |
| 15 | 2190.0350 | 1095.5211       | 2173.0084      | 1087.0078        | 2172.0244      | 1086.5158        | F    | 792.3999  | 396.7036        | 775.3733       | 388.1903         | 774.3893       | 387.6983         | 7  |
| 16 | 2261.0721 | 1131.0397       | 2244.0455      | 1122.5264        | 2243.0615      | 1122.0344        | A    | 645.3315  | 323.1694        | 628.3049       | 314.6561         | 627.3209       | 314.1641         | 6  |
| 17 | 2389.1306 | 1195.0690       | 2372.1041      | 1186.5557        | 2371.1201      | 1186.0637        | Q    | 574.2944  | 287.6508        | 557.2678       | 279.1375         | 556.2838       | 278.6455         | 5  |
| 18 | 2504.1576 | 1252.5824       | 2487.1310      | 1244.0692        | 2486.1470      | 1243.5772        | D    | 446.2358  | 223.6215        | 429.2092       | 215.1082         | 428.2252       | 214.6162         | 4  |
| 19 | 2603.2260 | 1302.1166       | 2586.1995      | 1293.6034        | 2585.2154      | 1293.1114        | V    | 331.2088  | 166.1081        | 314.1823       | 157.5948         |                |                  | 3  |
| 20 | 2660.2475 | 1330.6274       | 2643.2209      | 1322.1141        | 2642.2369      | 1321.6221        | G    | 232.1404  | 116.5738        | 215.1139       | 108.0606         |                |                  | 2  |
| 21 |           |                 |                |                  |                |                  | R    | 175.1190  | 88.0631         | 158.0924       | 79.5498          |                |                  | 1  |

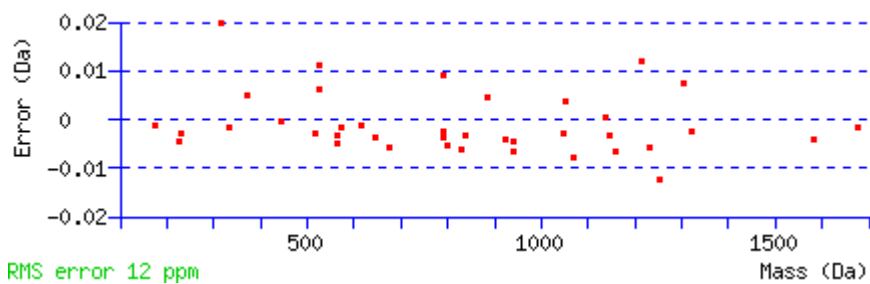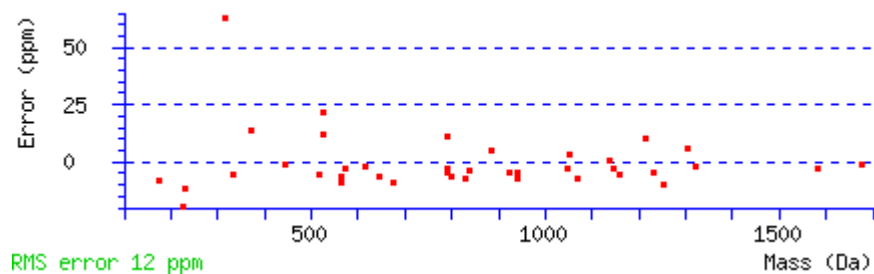

IDENTIFICATION 40

MS/MS Fragmentation of **LQEKLSPPYSSPQEFAQDVGR**

Found in

**Q13263**

, Transcription intermediary factor 1-beta OS=Homo sapiens GN=TRIM28 PE=1 SV=5

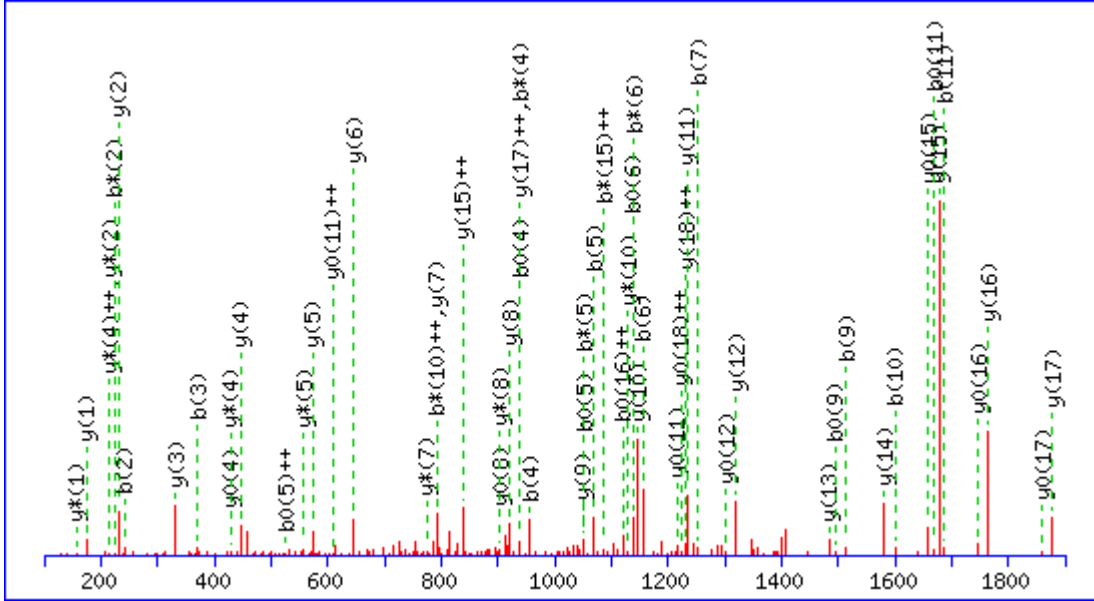

Monoisotopic mass of neutral peptide Mr(calc): 2832.3678

Variable modifications:

K4 : Sumo 3 (K)

Ions Score: 148 Expect: 5.7e-12

| #  | b         | b <sup>++</sup> | b <sup>*</sup> | b <sup>+++</sup> | b <sup>0</sup> | b <sup>0++</sup> | Seq. | y         | y <sup>++</sup> | y <sup>*</sup> | y <sup>+++</sup> | y <sup>0</sup> | y <sup>0++</sup> | #  |
|----|-----------|-----------------|----------------|------------------|----------------|------------------|------|-----------|-----------------|----------------|------------------|----------------|------------------|----|
| 1  | 114.0913  | 57.5493         |                |                  |                |                  | L    |           |                 |                |                  |                |                  | 21 |
| 2  | 242.1499  | 121.5786        | 225.1234       | 113.0653         |                |                  | Q    | 2720.2911 | 1360.6492       | 2703.2645      | 1352.1359        | 2702.2805      | 1351.6439        | 20 |
| 3  | 371.1925  | 186.0999        | 354.1660       | 177.5866         | 353.1819       | 177.0946         | E    | 2592.2325 | 1296.6199       | 2575.2059      | 1288.1066        | 2574.2219      | 1287.6146        | 19 |
| 4  | 956.4796  | 478.7434        | 939.4530       | 470.2302         | 938.4690       | 469.7381         | K    | 2463.1899 | 1232.0986       | 2446.1633      | 1223.5853        | 2445.1793      | 1223.0933        | 18 |
| 5  | 1069.5636 | 535.2855        | 1052.5371      | 526.7722         | 1051.5531      | 526.2802         | L    | 1877.9028 | 939.4550        | 1860.8763      | 930.9418         | 1859.8923      | 930.4498         | 17 |
| 6  | 1156.5957 | 578.8015        | 1139.5691      | 570.2882         | 1138.5851      | 569.7962         | S    | 1764.8188 | 882.9130        | 1747.7922      | 874.3997         | 1746.8082      | 873.9077         | 16 |
| 7  | 1253.6484 | 627.3279        | 1236.6219      | 618.8146         | 1235.6379      | 618.3226         | P    | 1677.7867 | 839.3970        | 1660.7602      | 830.8837         | 1659.7762      | 830.3917         | 15 |
| 8  | 1350.7012 | 675.8542        | 1333.6747      | 667.3410         | 1332.6906      | 666.8490         | P    | 1580.7340 | 790.8706        | 1563.7074      | 782.3573         | 1562.7234      | 781.8653         | 14 |
| 9  | 1513.7645 | 757.3859        | 1496.7380      | 748.8726         | 1495.7540      | 748.3806         | Y    | 1483.6812 | 742.3442        | 1466.6547      | 733.8310         | 1465.6706      | 733.3390         | 13 |
| 10 | 1600.7966 | 800.9019        | 1583.7700      | 792.3886         | 1582.7860      | 791.8966         | S    | 1320.6179 | 660.8126        | 1303.5913      | 652.2993         | 1302.6073      | 651.8073         | 12 |
| 11 | 1687.8286 | 844.4179        | 1670.8020      | 835.9047         | 1669.8180      | 835.4127         | S    | 1233.5858 | 617.2966        | 1216.5593      | 608.7833         | 1215.5753      | 608.2913         | 11 |
| 12 | 1784.8814 | 892.9443        | 1767.8548      | 884.4310         | 1766.8708      | 883.9390         | P    | 1146.5538 | 573.7805        | 1129.5273      | 565.2673         | 1128.5432      | 564.7753         | 10 |
| 13 | 1912.9399 | 956.9736        | 1895.9134      | 948.4603         | 1894.9294      | 947.9683         | Q    | 1049.5011 | 525.2542        | 1032.4745      | 516.7409         | 1031.4905      | 516.2489         | 9  |
| 14 | 2041.9825 | 1021.4949       | 2024.9560      | 1012.9816        | 2023.9720      | 1012.4896        | E    | 921.4425  | 461.2249        | 904.4159       | 452.7116         | 903.4319       | 452.2196         | 8  |
| 15 | 2189.0509 | 1095.0291       | 2172.0244      | 1086.5158        | 2171.0404      | 1086.0238        | F    | 792.3999  | 396.7036        | 775.3733       | 388.1903         | 774.3893       | 387.6983         | 7  |
| 16 | 2260.0881 | 1130.5477       | 2243.0615      | 1122.0344        | 2242.0775      | 1121.5424        | A    | 645.3315  | 323.1694        | 628.3049       | 314.6561         | 627.3209       | 314.1641         | 6  |
| 17 | 2388.1466 | 1194.5770       | 2371.1201      | 1186.0637        | 2370.1361      | 1185.5717        | Q    | 574.2944  | 287.6508        | 557.2678       | 279.1375         | 556.2838       | 278.6455         | 5  |
| 18 | 2503.1736 | 1252.0904       | 2486.1470      | 1243.5772        | 2485.1630      | 1243.0851        | D    | 446.2358  | 223.6215        | 429.2092       | 215.1082         | 428.2252       | 214.6162         | 4  |
| 19 | 2602.2420 | 1301.6246       | 2585.2154      | 1293.1114        | 2584.2314      | 1292.6193        | V    | 331.2088  | 166.1081        | 314.1823       | 157.5948         |                |                  | 3  |
| 20 | 2659.2635 | 1330.1354       | 2642.2369      | 1321.6221        | 2641.2529      | 1321.1301        | G    | 232.1404  | 116.5738        | 215.1139       | 108.0606         |                |                  | 2  |
| 21 |           |                 |                |                  |                |                  | R    | 175.1190  | 88.0631         | 158.0924       | 79.5498          |                |                  | 1  |

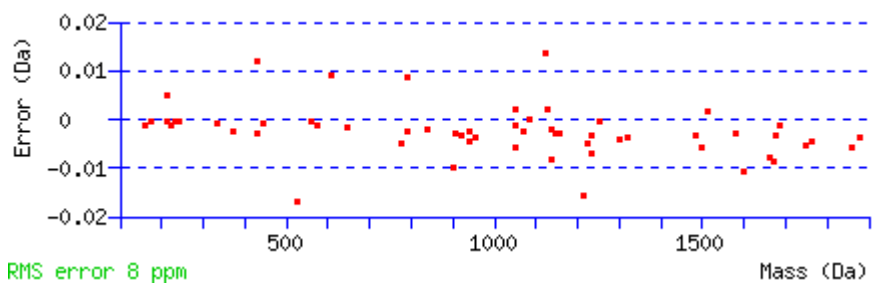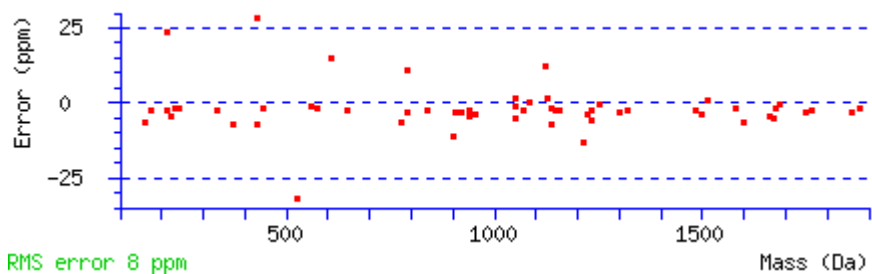

IDENTIFICATION 25

MS/MS Fragmentation of **ADEKPKEGVKTENNDHILNK**

Found in **P61956**, Small ubiquitin-related modifier 2 OS=Homo sapiens GN=SUMO2 PE=1 SV=3

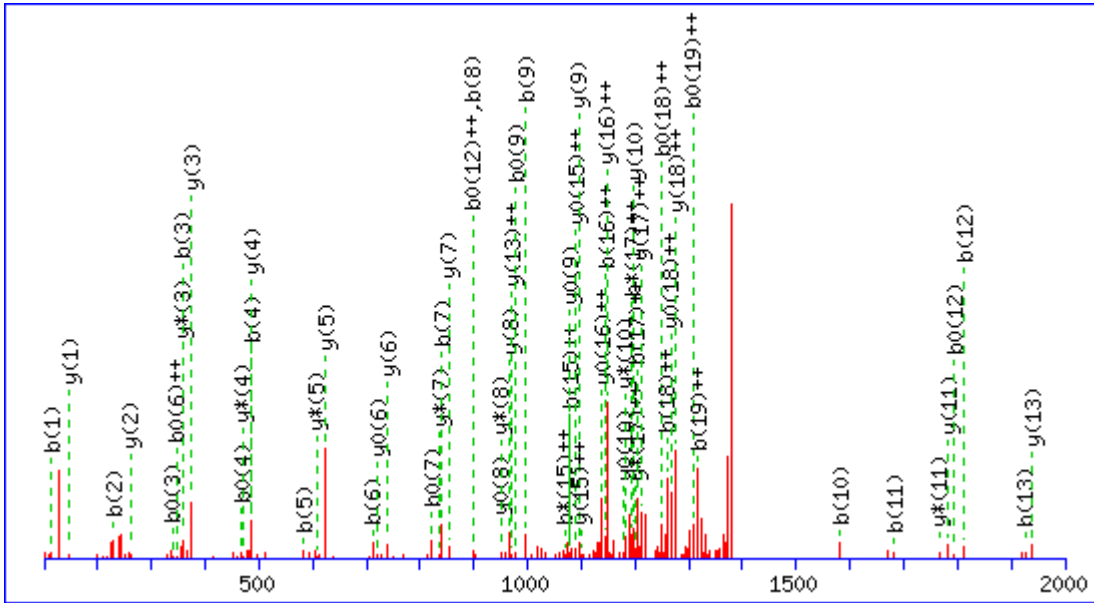

Monoisotopic mass of neutral peptide  $M_r(\text{calc})$ : 2777.3580

Variable modifications:

N-term : Acetyl (N-term)

K10 : Sumo 3 (K)

Ions Score: 92 Expect: 1.8e-06

| #  | b         | b <sup>++</sup> | b <sup>*</sup> | b <sup>+++</sup> | b <sup>0</sup> | b <sup>0++</sup> | Seq. | y         | y <sup>++</sup> | y <sup>*</sup> | y <sup>+++</sup> | y <sup>0</sup> | y <sup>0++</sup> | #  |
|----|-----------|-----------------|----------------|------------------|----------------|------------------|------|-----------|-----------------|----------------|------------------|----------------|------------------|----|
| 1  | 114.0550  | 57.5311         |                |                  |                |                  | A    |           |                 |                |                  |                |                  | 20 |
| 2  | 229.0819  | 115.0446        |                |                  | 211.0713       | 106.0393         | D    | 2665.3176 | 1333.1624       | 2648.2911      | 1324.6492        | 2647.3070      | 1324.1572        | 19 |
| 3  | 358.1245  | 179.5659        |                |                  | 340.1139       | 170.5606         | E    | 2550.2907 | 1275.6490       | 2533.2641      | 1267.1357        | 2532.2801      | 1266.6437        | 18 |
| 4  | 486.2195  | 243.6134        | 469.1929       | 235.1001         | 468.2089       | 234.6081         | K    | 2421.2481 | 1211.1277       | 2404.2215      | 1202.6144        | 2403.2375      | 1202.1224        | 17 |
| 5  | 583.2722  | 292.1397        | 566.2457       | 283.6265         | 565.2617       | 283.1345         | P    | 2293.1531 | 1147.0802       | 2276.1266      | 1138.5669        | 2275.1425      | 1138.0749        | 16 |
| 6  | 711.3672  | 356.1872        | 694.3406       | 347.6740         | 693.3566       | 347.1819         | K    | 2196.1003 | 1098.5538       | 2179.0738      | 1090.0405        | 2178.0898      | 1089.5485        | 15 |
| 7  | 840.4098  | 420.7085        | 823.3832       | 412.1953         | 822.3992       | 411.7032         | E    | 2068.0054 | 1034.5063       | 2050.9788      | 1025.9931        | 2049.9948      | 1025.5010        | 14 |
| 8  | 897.4312  | 449.2193        | 880.4047       | 440.7060         | 879.4207       | 440.2140         | G    | 1938.9628 | 969.9850        | 1921.9362      | 961.4718         | 1920.9522      | 960.9798         | 13 |
| 9  | 996.4997  | 498.7535        | 979.4731       | 490.2402         | 978.4891       | 489.7482         | V    | 1881.9413 | 941.4743        | 1864.9148      | 932.9610         | 1863.9308      | 932.4690         | 12 |
| 10 | 1581.7867 | 791.3970        | 1564.7602      | 782.8837         | 1563.7762      | 782.3917         | K    | 1782.8729 | 891.9401        | 1765.8464      | 883.4268         | 1764.8623      | 882.9348         | 11 |
| 11 | 1682.8344 | 841.9208        | 1665.8079      | 833.4076         | 1664.8238      | 832.9156         | T    | 1197.5858 | 599.2966        | 1180.5593      | 590.7833         | 1179.5753      | 590.2913         | 10 |
| 12 | 1811.8770 | 906.4421        | 1794.8504      | 897.9289         | 1793.8664      | 897.4369         | E    | 1096.5382 | 548.7727        | 1079.5116      | 540.2594         | 1078.5276      | 539.7674         | 9  |
| 13 | 1925.9199 | 963.4636        | 1908.8934      | 954.9503         | 1907.9094      | 954.4583         | N    | 967.4956  | 484.2514        | 950.4690       | 475.7381         | 949.4850       | 475.2461         | 8  |
| 14 | 2039.9629 | 1020.4851       | 2022.9363      | 1011.9718        | 2021.9523      | 1011.4798        | N    | 853.4526  | 427.2300        | 836.4261       | 418.7167         | 835.4421       | 418.2247         | 7  |
| 15 | 2154.9898 | 1077.9985       | 2137.9632      | 1069.4853        | 2136.9792      | 1068.9933        | D    | 739.4097  | 370.2085        | 722.3832       | 361.6952         | 721.3991       | 361.2032         | 6  |
| 16 | 2292.0487 | 1146.5280       | 2275.0222      | 1138.0147        | 2274.0381      | 1137.5227        | H    | 624.3828  | 312.6950        | 607.3562       | 304.1817         |                |                  | 5  |
| 17 | 2405.1328 | 1203.0700       | 2388.1062      | 1194.5567        | 2387.1222      | 1194.0647        | I    | 487.3239  | 244.1656        | 470.2973       | 235.6523         |                |                  | 4  |
| 18 | 2519.1757 | 1260.0915       | 2502.1491      | 1251.5782        | 2501.1651      | 1251.0862        | N    | 374.2398  | 187.6235        | 357.2132       | 179.1103         |                |                  | 3  |
| 19 | 2632.2598 | 1316.6335       | 2615.2332      | 1308.1202        | 2614.2492      | 1307.6282        | L    | 260.1969  | 130.6021        | 243.1703       | 122.0888         |                |                  | 2  |
| 20 |           |                 |                |                  |                |                  | K    | 147.1128  | 74.0600         | 130.0863       | 65.5468          |                |                  | 1  |



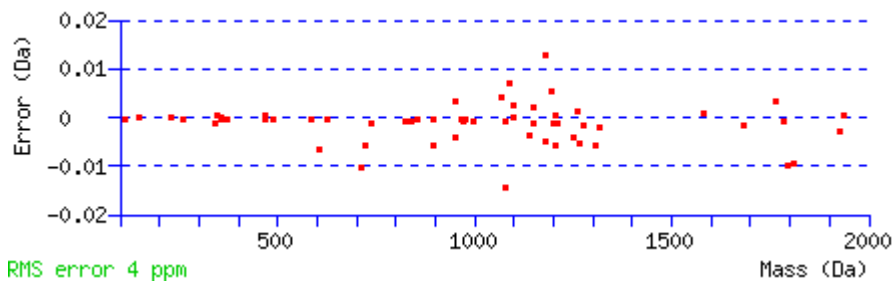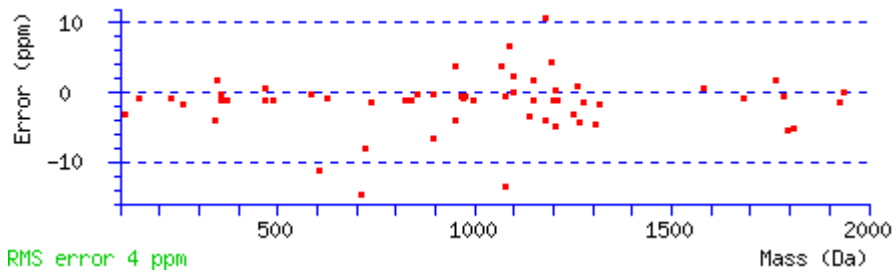

IDENTIFICATION 41

MS/MS Fragmentation of **LSSVDRHHSVEIKIEK**

Found in **Q14151**, Scaffold attachment factor B2 OS=Homo sapiens GN=SAFB2 PE=1 SV=1

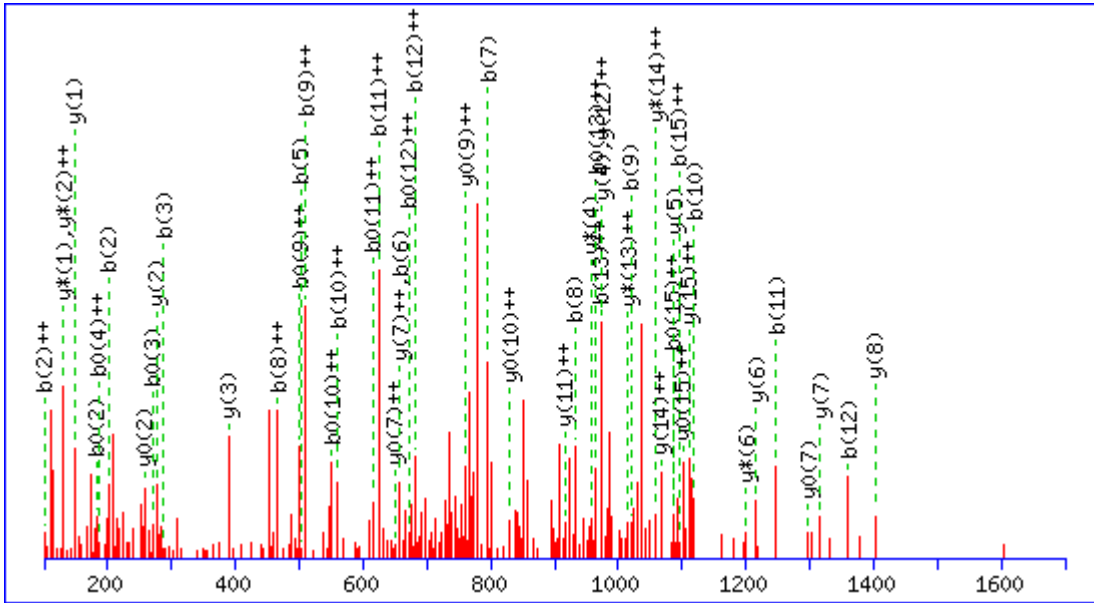

Monoisotopic mass of neutral peptide  $M_r(\text{calc})$ : 2333.2087

Variable modifications:

K13 : Sumo 3 (K)

Ions Score: 32 Expect: 0.54

| #  | b         | b <sup>++</sup> | b <sup>*</sup> | b <sup>+++</sup> | b <sup>0</sup> | b <sup>0++</sup> | Seq. | y         | y <sup>++</sup> | y <sup>*</sup> | y <sup>+++</sup> | y <sup>0</sup> | y <sup>0++</sup> | #  |
|----|-----------|-----------------|----------------|------------------|----------------|------------------|------|-----------|-----------------|----------------|------------------|----------------|------------------|----|
| 1  | 114.0913  | 57.5493         |                |                  |                |                  | L    |           |                 |                |                  |                |                  | 16 |
| 2  | 201.1234  | 101.0653        |                |                  | 183.1128       | 92.0600          | S    | 2221.1320 | 1111.0696       | 2204.1054      | 1102.5564        | 2203.1214      | 1102.0643        | 15 |
| 3  | 288.1554  | 144.5813        |                |                  | 270.1448       | 135.5761         | S    | 2134.1000 | 1067.5536       | 2117.0734      | 1059.0403        | 2116.0894      | 1058.5483        | 14 |
| 4  | 387.2238  | 194.1155        |                |                  | 369.2132       | 185.1103         | V    | 2047.0679 | 1024.0376       | 2030.0414      | 1015.5243        | 2029.0574      | 1015.0323        | 13 |
| 5  | 502.2508  | 251.6290        |                |                  | 484.2402       | 242.6237         | D    | 1947.9995 | 974.5034        | 1930.9730      | 965.9901         | 1929.9889      | 965.4981         | 12 |
| 6  | 658.3519  | 329.6796        | 641.3253       | 321.1663         | 640.3413       | 320.6743         | R    | 1832.9726 | 916.9899        | 1815.9460      | 908.4766         | 1814.9620      | 907.9846         | 11 |
| 7  | 795.4108  | 398.2090        | 778.3842       | 389.6958         | 777.4002       | 389.2037         | H    | 1676.8715 | 838.9394        | 1659.8449      | 830.4261         | 1658.8609      | 829.9341         | 10 |
| 8  | 932.4697  | 466.7385        | 915.4431       | 458.2252         | 914.4591       | 457.7332         | H    | 1539.8125 | 770.4099        | 1522.7860      | 761.8966         | 1521.8020      | 761.4046         | 9  |
| 9  | 1019.5017 | 510.2545        | 1002.4752      | 501.7412         | 1001.4912      | 501.2492         | S    | 1402.7536 | 701.8805        | 1385.7271      | 693.3672         | 1384.7431      | 692.8752         | 8  |
| 10 | 1118.5701 | 559.7887        | 1101.5436      | 551.2754         | 1100.5596      | 550.7834         | V    | 1315.7216 | 658.3644        | 1298.6951      | 649.8512         | 1297.7110      | 649.3592         | 7  |
| 11 | 1247.6127 | 624.3100        | 1230.5862      | 615.7967         | 1229.6022      | 615.3047         | E    | 1216.6532 | 608.8302        | 1199.6266      | 600.3170         | 1198.6426      | 599.8250         | 6  |
| 12 | 1360.6968 | 680.8520        | 1343.6702      | 672.3388         | 1342.6862      | 671.8467         | I    | 1087.6106 | 544.3089        | 1070.5841      | 535.7957         | 1069.6000      | 535.3037         | 5  |
| 13 | 1945.9839 | 973.4956        | 1928.9573      | 964.9823         | 1927.9733      | 964.4903         | K    | 974.5265  | 487.7669        | 957.5000       | 479.2536         | 956.5160       | 478.7616         | 4  |
| 14 | 2059.0679 | 1030.0376       | 2042.0414      | 1021.5243        | 2041.0574      | 1021.0323        | I    | 389.2395  | 195.1234        | 372.2129       | 186.6101         | 371.2289       | 186.1181         | 3  |
| 15 | 2188.1105 | 1094.5589       | 2171.0840      | 1086.0456        | 2170.1000      | 1085.5536        | E    | 276.1554  | 138.5813        | 259.1288       | 130.0681         | 258.1448       | 129.5761         | 2  |
| 16 |           |                 |                |                  |                |                  | K    | 147.1128  | 74.0600         | 130.0863       | 65.5468          |                |                  | 1  |

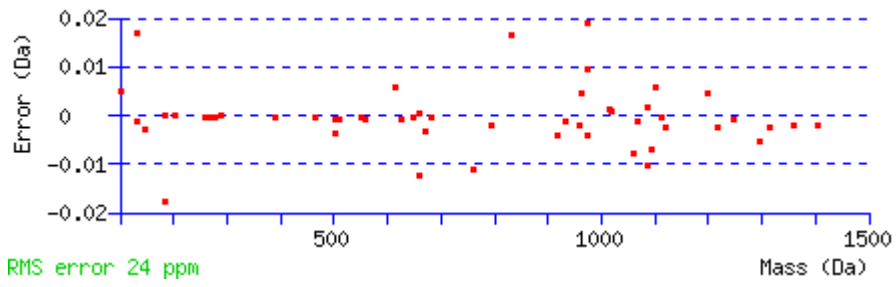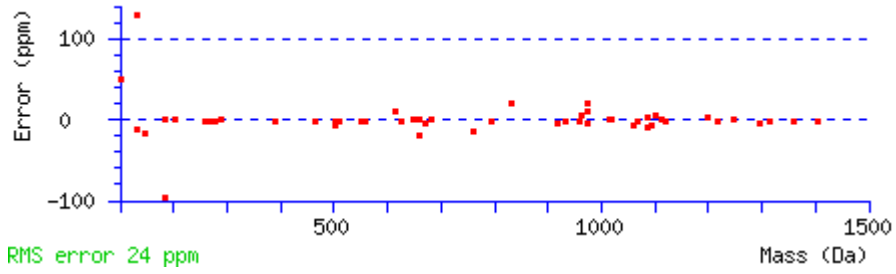

IDENTIFICATION 42

MS/MS Fragmentation of **LTEDKADVQSIIGLQR**

Found in **Q13263**, Transcription intermediary factor 1-beta OS=Homo sapiens GN=TRIM28 PE=1 SV=5

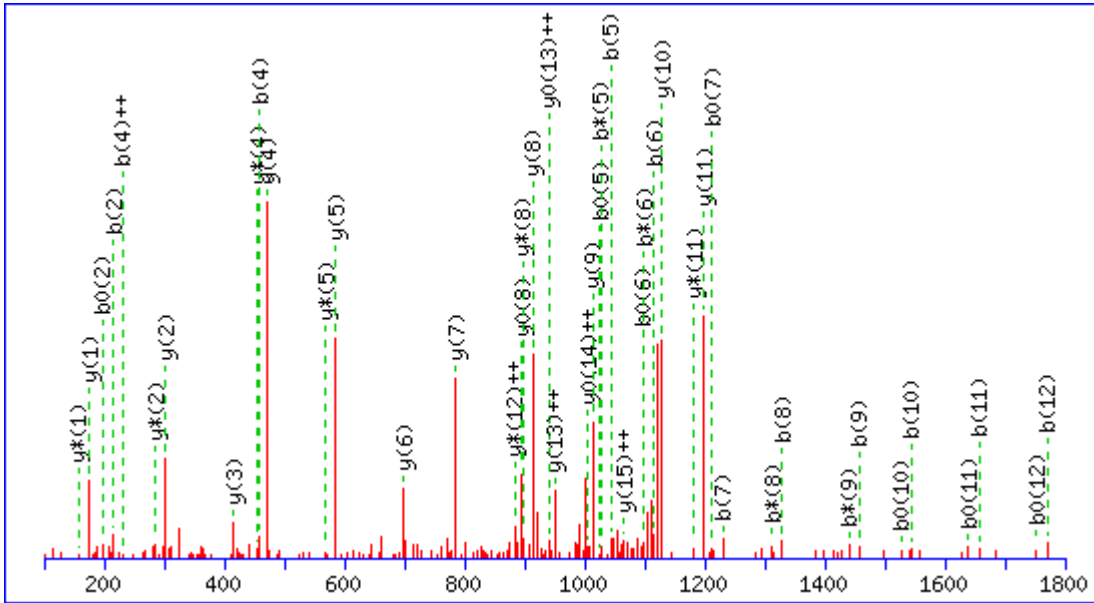

Monoisotopic mass of neutral peptide Mr(calc): 2242.1553 Variable modifications: K5 : Sumo 3 (K) Ions Score: 84 Expect: 4.5e-06

| #  | b         | b <sup>++</sup> | b <sup>*</sup> | b <sup>+++</sup> | b <sup>0</sup> | b <sup>0++</sup> | Seq. | y         | y <sup>++</sup> | y <sup>*</sup> | y <sup>+++</sup> | y <sup>0</sup> | y <sup>0++</sup> | #  |
|----|-----------|-----------------|----------------|------------------|----------------|------------------|------|-----------|-----------------|----------------|------------------|----------------|------------------|----|
| 1  | 114.0913  | 57.5493         |                |                  |                |                  | L    |           |                 |                |                  |                |                  | 16 |
| 2  | 215.1390  | 108.0731        |                |                  | 197.1285       | 99.0679          | T    | 2130.0786 | 1065.5429       | 2113.0520      | 1057.0296        | 2112.0680      | 1056.5376        | 15 |
| 3  | 344.1816  | 172.5944        |                |                  | 326.1710       | 163.5892         | E    | 2029.0309 | 1015.0191       | 2012.0043      | 1006.5058        | 2011.0203      | 1006.0138        | 14 |
| 4  | 459.2086  | 230.1079        |                |                  | 441.1980       | 221.1026         | D    | 1899.9883 | 950.4978        | 1882.9617      | 941.9845         | 1881.9777      | 941.4925         | 13 |
| 5  | 1044.4956 | 522.7515        | 1027.4691      | 514.2382         | 1026.4851      | 513.7462         | K    | 1784.9613 | 892.9843        | 1767.9348      | 884.4710         | 1766.9508      | 883.9790         | 12 |
| 6  | 1115.5327 | 558.2700        | 1098.5062      | 549.7567         | 1097.5222      | 549.2647         | A    | 1199.6743 | 600.3408        | 1182.6477      | 591.8275         | 1181.6637      | 591.3355         | 11 |
| 7  | 1230.5597 | 615.7835        | 1213.5331      | 607.2702         | 1212.5491      | 606.7782         | D    | 1128.6371 | 564.8222        | 1111.6106      | 556.3089         | 1110.6266      | 555.8169         | 10 |
| 8  | 1329.6281 | 665.3177        | 1312.6016      | 656.8044         | 1311.6175      | 656.3124         | V    | 1013.6102 | 507.3087        | 996.5837       | 498.7955         | 995.5996       | 498.3035         | 9  |
| 9  | 1457.6867 | 729.3470        | 1440.6601      | 720.8337         | 1439.6761      | 720.3417         | Q    | 914.5418  | 457.7745        | 897.5152       | 449.2613         | 896.5312       | 448.7693         | 8  |
| 10 | 1544.7187 | 772.8630        | 1527.6922      | 764.3497         | 1526.7081      | 763.8577         | S    | 786.4832  | 393.7452        | 769.4567       | 385.2320         | 768.4726       | 384.7400         | 7  |
| 11 | 1657.8028 | 829.4050        | 1640.7762      | 820.8917         | 1639.7922      | 820.3997         | I    | 699.4512  | 350.2292        | 682.4246       | 341.7160         |                |                  | 6  |
| 12 | 1770.8868 | 885.9471        | 1753.8603      | 877.4338         | 1752.8763      | 876.9418         | I    | 586.3671  | 293.6872        | 569.3406       | 285.1739         |                |                  | 5  |
| 13 | 1827.9083 | 914.4578        | 1810.8817      | 905.9445         | 1809.8977      | 905.4525         | G    | 473.2831  | 237.1452        | 456.2565       | 228.6319         |                |                  | 4  |
| 14 | 1940.9924 | 970.9998        | 1923.9658      | 962.4865         | 1922.9818      | 961.9945         | L    | 416.2616  | 208.6344        | 399.2350       | 200.1212         |                |                  | 3  |
| 15 | 2069.0509 | 1035.0291       | 2052.0244      | 1026.5158        | 2051.0404      | 1026.0238        | Q    | 303.1775  | 152.0924        | 286.1510       | 143.5791         |                |                  | 2  |
| 16 |           |                 |                |                  |                |                  | R    | 175.1190  | 88.0631         | 158.0924       | 79.5498          |                |                  | 1  |

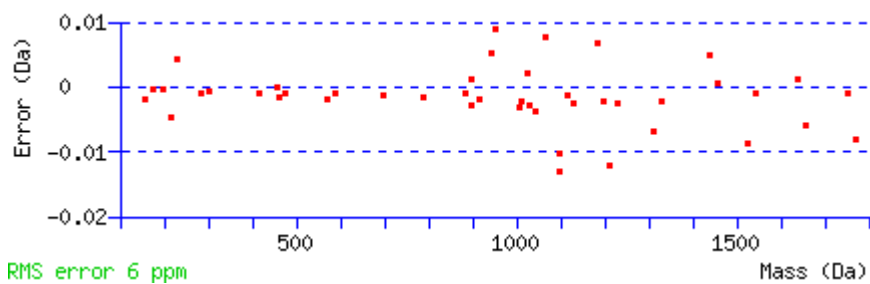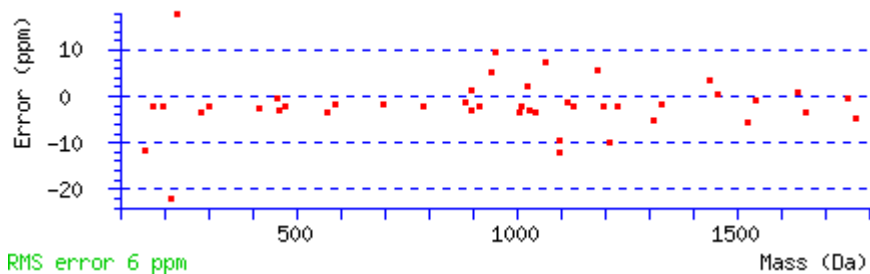

IDENTIFICATION 43

MS/MS Fragmentation of **QFNKLTEDKADVQSIIGLQR**

Found in **Q13263**, Transcription intermediary factor 1-beta OS=Homo sapiens GN=TRIM28 PE=1 SV=5

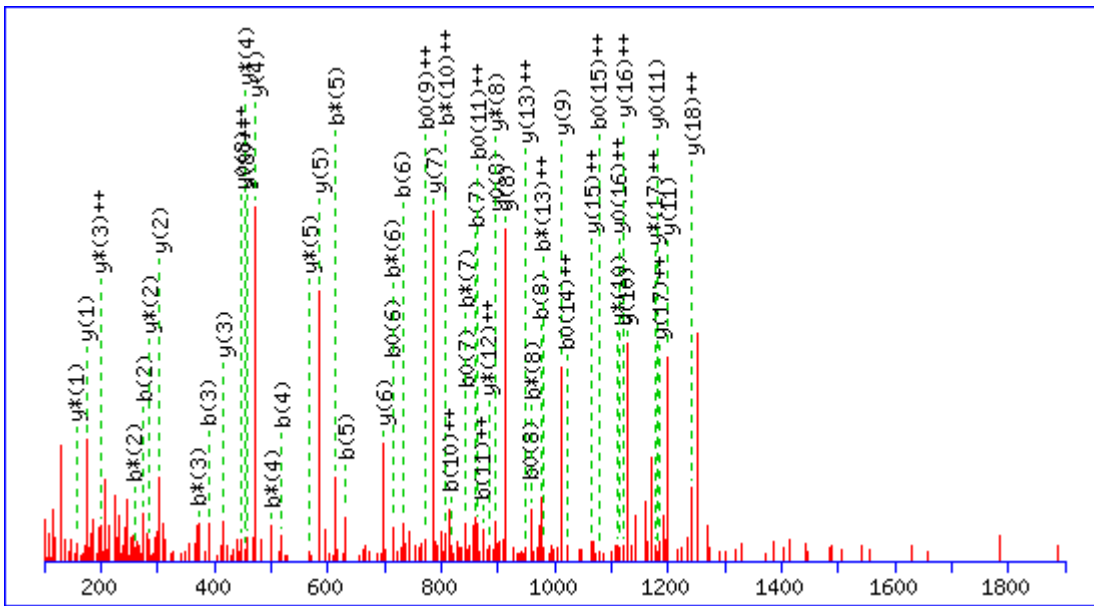

Monoisotopic mass of neutral peptide  $M_r(\text{calc})$ : 2759.4202

Variable modifications:

K9 : Sumo 3 (K)

Ions Score: 59 Expect: 0.0013

| #  | b         | b <sup>++</sup> | b <sup>*</sup> | b <sup>+++</sup> | b <sup>0</sup> | b <sup>0++</sup> | Seq. | y         | y <sup>++</sup> | y <sup>*</sup> | y <sup>+++</sup> | y <sup>0</sup> | y <sup>0++</sup> | #  |
|----|-----------|-----------------|----------------|------------------|----------------|------------------|------|-----------|-----------------|----------------|------------------|----------------|------------------|----|
| 1  | 129.0659  | 65.0366         | 112.0393       | 56.5233          |                |                  | Q    |           |                 |                |                  |                |                  | 20 |
| 2  | 276.1343  | 138.5708        | 259.1077       | 130.0575         |                |                  | F    | 2632.3689 | 1316.6881       | 2615.3424      | 1308.1748        | 2614.3584      | 1307.6828        | 19 |
| 3  | 390.1772  | 195.5922        | 373.1506       | 187.0790         |                |                  | N    | 2485.3005 | 1243.1539       | 2468.2740      | 1234.6406        | 2467.2899      | 1234.1486        | 18 |
| 4  | 518.2722  | 259.6397        | 501.2456       | 251.1264         |                |                  | K    | 2371.2576 | 1186.1324       | 2354.2310      | 1177.6192        | 2353.2470      | 1177.1271        | 17 |
| 5  | 631.3562  | 316.1817        | 614.3297       | 307.6685         |                |                  | L    | 2243.1626 | 1122.0849       | 2226.1361      | 1113.5717        | 2225.1521      | 1113.0797        | 16 |
| 6  | 732.4039  | 366.7056        | 715.3774       | 358.1923         | 714.3933       | 357.7003         | T    | 2130.0786 | 1065.5429       | 2113.0520      | 1057.0296        | 2112.0680      | 1056.5376        | 15 |
| 7  | 861.4465  | 431.2269        | 844.4199       | 422.7136         | 843.4359       | 422.2216         | E    | 2029.0309 | 1015.0191       | 2012.0043      | 1006.5058        | 2011.0203      | 1006.0138        | 14 |
| 8  | 976.4734  | 488.7404        | 959.4469       | 480.2271         | 958.4629       | 479.7351         | D    | 1899.9883 | 950.4978        | 1882.9617      | 941.9845         | 1881.9777      | 941.4925         | 13 |
| 9  | 1561.7605 | 781.3839        | 1544.7340      | 772.8706         | 1543.7499      | 772.3786         | K    | 1784.9613 | 892.9843        | 1767.9348      | 884.4710         | 1766.9508      | 883.9790         | 12 |
| 10 | 1632.7976 | 816.9025        | 1615.7711      | 808.3892         | 1614.7871      | 807.8972         | A    | 1199.6743 | 600.3408        | 1182.6477      | 591.8275         | 1181.6637      | 591.3355         | 11 |
| 11 | 1747.8246 | 874.4159        | 1730.7980      | 865.9026         | 1729.8140      | 865.4106         | D    | 1128.6371 | 564.8222        | 1111.6106      | 556.3089         | 1110.6266      | 555.8169         | 10 |
| 12 | 1846.8930 | 923.9501        | 1829.8664      | 915.4369         | 1828.8824      | 914.9448         | V    | 1013.6102 | 507.3087        | 996.5837       | 498.7955         | 995.5996       | 498.3035         | 9  |
| 13 | 1974.9516 | 987.9794        | 1957.9250      | 979.4661         | 1956.9410      | 978.9741         | Q    | 914.5418  | 457.7745        | 897.5152       | 449.2613         | 896.5312       | 448.7693         | 8  |
| 14 | 2061.9836 | 1031.4954       | 2044.9570      | 1022.9822        | 2043.9730      | 1022.4901        | S    | 786.4832  | 393.7452        | 769.4567       | 385.2320         | 768.4726       | 384.7400         | 7  |
| 15 | 2175.0677 | 1088.0375       | 2158.0411      | 1079.5242        | 2157.0571      | 1079.0322        | I    | 699.4512  | 350.2292        | 682.4246       | 341.7160         |                |                  | 6  |
| 16 | 2288.1517 | 1144.5795       | 2271.1252      | 1136.0662        | 2270.1412      | 1135.5742        | I    | 586.3671  | 293.6872        | 569.3406       | 285.1739         |                |                  | 5  |
| 17 | 2345.1732 | 1173.0902       | 2328.1466      | 1164.5770        | 2327.1626      | 1164.0849        | G    | 473.2831  | 237.1452        | 456.2565       | 228.6319         |                |                  | 4  |
| 18 | 2458.2572 | 1229.6323       | 2441.2307      | 1221.1190        | 2440.2467      | 1220.6270        | L    | 416.2616  | 208.6344        | 399.2350       | 200.1212         |                |                  | 3  |
| 19 | 2586.3158 | 1293.6615       | 2569.2893      | 1285.1483        | 2568.3053      | 1284.6563        | Q    | 303.1775  | 152.0924        | 286.1510       | 143.5791         |                |                  | 2  |
| 20 |           |                 |                |                  |                |                  | R    | 175.1190  | 88.0631         | 158.0924       | 79.5498          |                |                  | 1  |

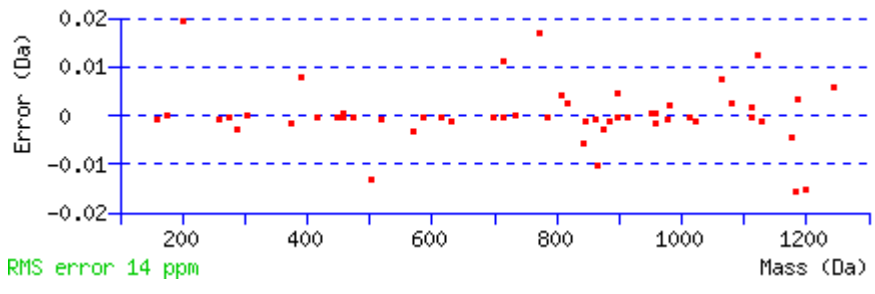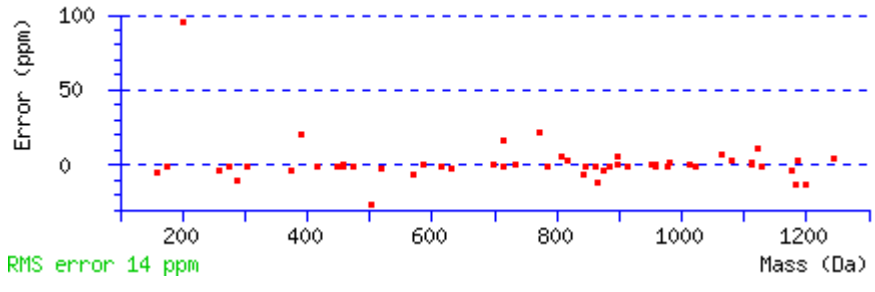

IDENTIFICATION 44

MS/MS Fragmentation of **SDQEAKPSTEDLGDKKEGEYIK**

Found in **P63165**, Small ubiquitin-related modifier 1 OS=Homo sapiens GN=SUMO1 PE=1 SV=1

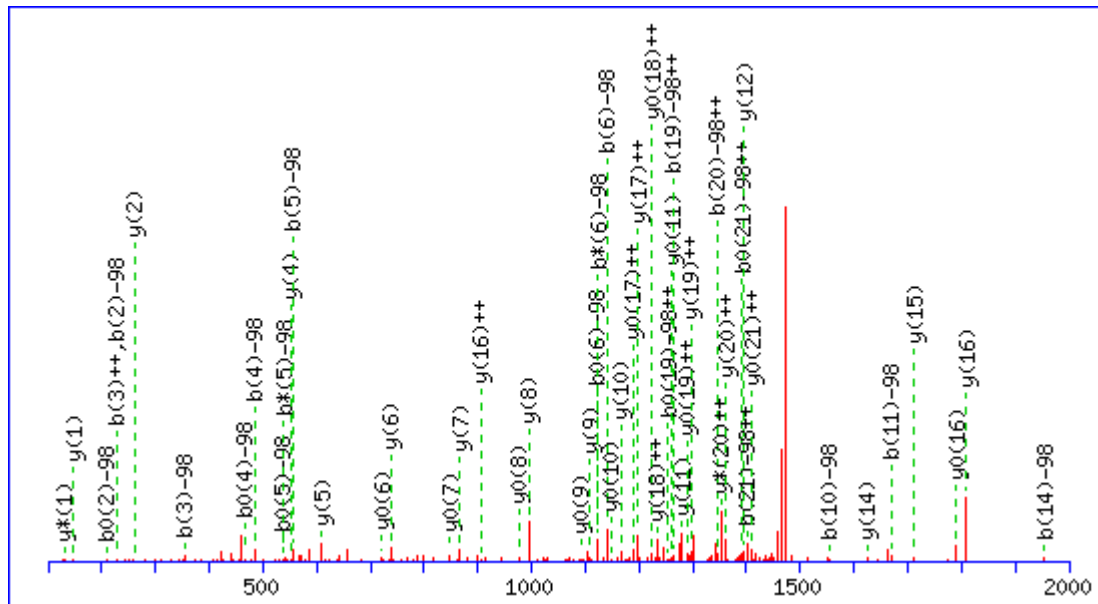

Monoisotopic mass of neutral peptide  $M_r(\text{calc})$ : 3045.3451

Variable modifications:

N-term : Acetyl (N-term)

S1 : Phospho (ST), with neutral losses 97.9769 (shown in table), 0.0000

K6 : Sumo 3 (K)

Ions Score: 62 Expect: 0.0041

| #  | b         | b <sup>++</sup> | b <sup>*</sup> | b <sup>+++</sup> | b <sup>0</sup> | b <sup>0++</sup> | Seq. | y         | y <sup>++</sup> | y <sup>*</sup> | y <sup>+++</sup> | y <sup>0</sup> | y <sup>0++</sup> | #  |
|----|-----------|-----------------|----------------|------------------|----------------|------------------|------|-----------|-----------------|----------------|------------------|----------------|------------------|----|
| 1  | 112.0393  | 56.5233         |                |                  | 94.0287        | 47.5180          | S    |           |                 |                |                  |                |                  | 22 |
| 2  | 227.0662  | 114.0368        |                |                  | 209.0557       | 105.0315         | D    | 2837.3436 | 1419.1754       | 2820.3170      | 1410.6621        | 2819.3330      | 1410.1701        | 21 |
| 3  | 355.1248  | 178.0661        | 338.0983       | 169.5528         | 337.1143       | 169.0608         | Q    | 2722.3166 | 1361.6619       | 2705.2901      | 1353.1487        | 2704.3060      | 1352.6567        | 20 |
| 4  | 484.1674  | 242.5873        | 467.1409       | 234.0741         | 466.1569       | 233.5821         | E    | 2594.2580 | 1297.6327       | 2577.2315      | 1289.1194        | 2576.2475      | 1288.6274        | 19 |
| 5  | 555.2045  | 278.1059        | 538.1780       | 269.5926         | 537.1940       | 269.1006         | A    | 2465.2154 | 1233.1114       | 2448.1889      | 1224.5981        | 2447.2049      | 1224.1061        | 18 |
| 6  | 1140.4916 | 570.7494        | 1123.4651      | 562.2362         | 1122.4810      | 561.7442         | K    | 2394.1783 | 1197.5928       | 2377.1518      | 1189.0795        | 2376.1678      | 1188.5875        | 17 |
| 7  | 1237.5444 | 619.2758        | 1220.5178      | 610.7625         | 1219.5338      | 610.2705         | P    | 1808.8913 | 904.9493        | 1791.8647      | 896.4360         | 1790.8807      | 895.9440         | 16 |
| 8  | 1324.5764 | 662.7918        | 1307.5498      | 654.2786         | 1306.5658      | 653.7866         | S    | 1711.8385 | 856.4229        | 1694.8119      | 847.9096         | 1693.8279      | 847.4176         | 15 |
| 9  | 1425.6241 | 713.3157        | 1408.5975      | 704.8024         | 1407.6135      | 704.3104         | T    | 1624.8065 | 812.9069        | 1607.7799      | 804.3936         | 1606.7959      | 803.9016         | 14 |
| 10 | 1554.6667 | 777.8370        | 1537.6401      | 769.3237         | 1536.6561      | 768.8317         | E    | 1523.7588 | 762.3830        | 1506.7322      | 753.8698         | 1505.7482      | 753.3777         | 13 |
| 11 | 1669.6936 | 835.3504        | 1652.6671      | 826.8372         | 1651.6830      | 826.3452         | D    | 1394.7162 | 697.8617        | 1377.6896      | 689.3485         | 1376.7056      | 688.8564         | 12 |
| 12 | 1782.7777 | 891.8925        | 1765.7511      | 883.3792         | 1764.7671      | 882.8872         | L    | 1279.6892 | 640.3483        | 1262.6627      | 631.8350         | 1261.6787      | 631.3430         | 11 |
| 13 | 1839.7991 | 920.4032        | 1822.7726      | 911.8899         | 1821.7886      | 911.3979         | G    | 1166.6052 | 583.8062        | 1149.5786      | 575.2930         | 1148.5946      | 574.8009         | 10 |
| 14 | 1954.8261 | 977.9167        | 1937.7995      | 969.4034         | 1936.8155      | 968.9114         | D    | 1109.5837 | 555.2955        | 1092.5572      | 546.7822         | 1091.5732      | 546.2902         | 9  |
| 15 | 2082.9210 | 1041.9642       | 2065.8945      | 1033.4509        | 2064.9105      | 1032.9589        | K    | 994.5568  | 497.7820        | 977.5302       | 489.2688         | 976.5462       | 488.7767         | 8  |
| 16 | 2211.0160 | 1106.0116       | 2193.9895      | 1097.4984        | 2193.0054      | 1097.0064        | K    | 866.4618  | 433.7345        | 849.4353       | 425.2213         | 848.4512       | 424.7293         | 7  |
| 17 | 2340.0586 | 1170.5329       | 2323.0321      | 1162.0197        | 2322.0480      | 1161.5277        | E    | 738.3668  | 369.6871        | 721.3403       | 361.1738         | 720.3563       | 360.6818         | 6  |
| 18 | 2397.0801 | 1199.0437       | 2380.0535      | 1190.5304        | 2379.0695      | 1190.0384        | G    | 609.3243  | 305.1658        | 592.2977       | 296.6525         | 591.3137       | 296.1605         | 5  |
| 19 | 2526.1227 | 1263.5650       | 2509.0961      | 1255.0517        | 2508.1121      | 1254.5597        | E    | 552.3028  | 276.6550        | 535.2762       | 268.1418         | 534.2922       | 267.6498         | 4  |
| 20 | 2689.1860 | 1345.0966       | 2672.1594      | 1336.5834        | 2671.1754      | 1336.0913        | Y    | 423.2602  | 212.1337        | 406.2336       | 203.6205         |                |                  | 3  |
| 21 | 2802.2701 | 1401.6387       | 2785.2435      | 1393.1254        | 2784.2595      | 1392.6334        | I    | 260.1969  | 130.6021        | 243.1703       | 122.0888         |                |                  | 2  |
| 22 |           |                 |                |                  |                |                  | K    | 147.1128  | 74.0600         | 130.0863       | 65.5468          |                |                  | 1  |



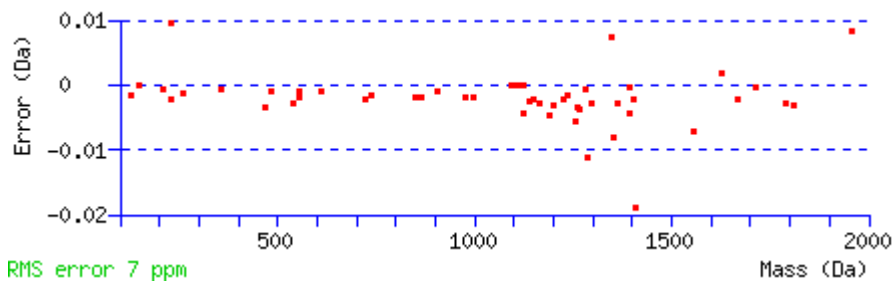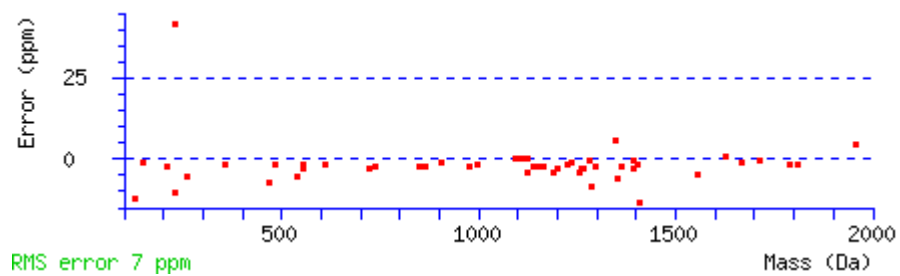

IDENTIFICATION 45

MS/MS Fragmentation of **SDQEAKPSTEDLGDKKEGEYIK**

Found in **P63165**, Small ubiquitin-related modifier 1 OS=Homo sapiens GN=SUMO1 PE=1 SV=1

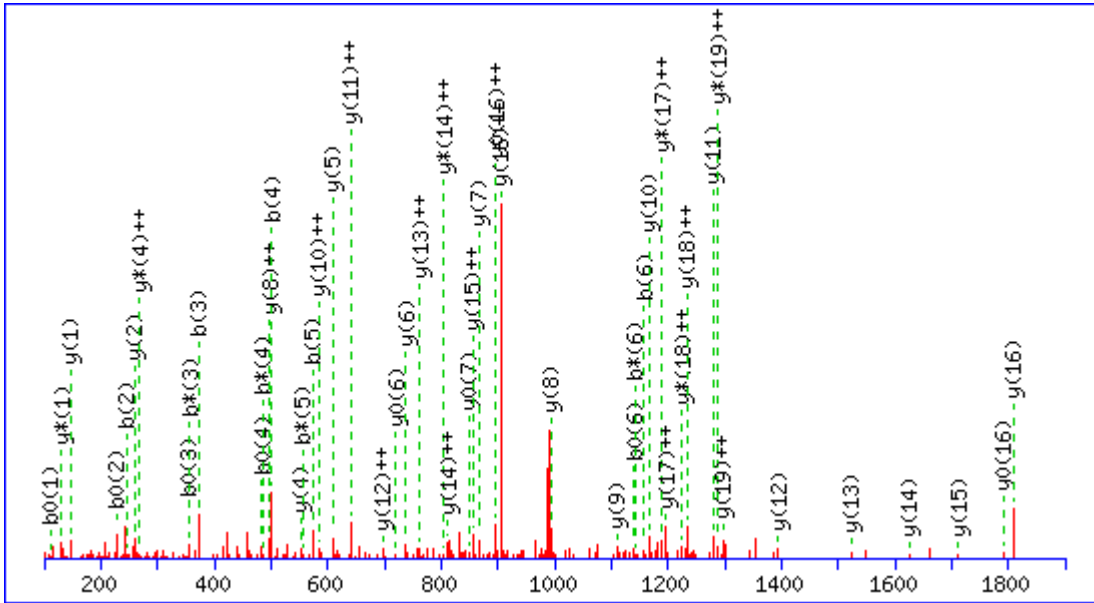

Monoisotopic mass of neutral peptide  $M_r(\text{calc})$ : 2965.3788

Variable modifications:

N-term : Acetyl (N-term)

K6 : Sumo 3 (K)

Ions Score: 63 Expect: 0.0025

| #  | b         | b <sup>++</sup> | b <sup>*</sup> | b <sup>+++</sup> | b <sup>0</sup> | b <sup>0++</sup> | Seq. | y         | y <sup>++</sup> | y <sup>*</sup> | y <sup>+++</sup> | y <sup>0</sup> | y <sup>0++</sup> | #  |
|----|-----------|-----------------|----------------|------------------|----------------|------------------|------|-----------|-----------------|----------------|------------------|----------------|------------------|----|
| 1  | 130.0499  | 65.5286         |                |                  | 112.0393       | 56.5233          | S    |           |                 |                |                  |                |                  | 22 |
| 2  | 245.0768  | 123.0420        |                |                  | 227.0662       | 114.0368         | D    | 2837.3436 | 1419.1754       | 2820.3170      | 1410.6621        | 2819.3330      | 1410.1701        | 21 |
| 3  | 373.1354  | 187.0713        | 356.1088       | 178.5581         | 355.1248       | 178.0661         | Q    | 2722.3166 | 1361.6619       | 2705.2901      | 1353.1487        | 2704.3060      | 1352.6567        | 20 |
| 4  | 502.1780  | 251.5926        | 485.1514       | 243.0794         | 484.1674       | 242.5873         | E    | 2594.2580 | 1297.6327       | 2577.2315      | 1289.1194        | 2576.2475      | 1288.6274        | 19 |
| 5  | 573.2151  | 287.1112        | 556.1885       | 278.5979         | 555.2045       | 278.1059         | A    | 2465.2154 | 1233.1114       | 2448.1889      | 1224.5981        | 2447.2049      | 1224.1061        | 18 |
| 6  | 1158.5022 | 579.7547        | 1141.4756      | 571.2414         | 1140.4916      | 570.7494         | K    | 2394.1783 | 1197.5928       | 2377.1518      | 1189.0795        | 2376.1678      | 1188.5875        | 17 |
| 7  | 1255.5549 | 628.2811        | 1238.5284      | 619.7678         | 1237.5444      | 619.2758         | P    | 1808.8913 | 904.9493        | 1791.8647      | 896.4360         | 1790.8807      | 895.9440         | 16 |
| 8  | 1342.5870 | 671.7971        | 1325.5604      | 663.2838         | 1324.5764      | 662.7918         | S    | 1711.8385 | 856.4229        | 1694.8119      | 847.9096         | 1693.8279      | 847.4176         | 15 |
| 9  | 1443.6346 | 722.3210        | 1426.6081      | 713.8077         | 1425.6241      | 713.3157         | T    | 1624.8065 | 812.9069        | 1607.7799      | 804.3936         | 1606.7959      | 803.9016         | 14 |
| 10 | 1572.6772 | 786.8423        | 1555.6507      | 778.3290         | 1554.6667      | 777.8370         | E    | 1523.7588 | 762.3830        | 1506.7322      | 753.8698         | 1505.7482      | 753.3777         | 13 |
| 11 | 1687.7042 | 844.3557        | 1670.6776      | 835.8425         | 1669.6936      | 835.3504         | D    | 1394.7162 | 697.8617        | 1377.6896      | 689.3485         | 1376.7056      | 688.8564         | 12 |
| 12 | 1800.7882 | 900.8978        | 1783.7617      | 892.3845         | 1782.7777      | 891.8925         | L    | 1279.6892 | 640.3483        | 1262.6627      | 631.8350         | 1261.6787      | 631.3430         | 11 |
| 13 | 1857.8097 | 929.4085        | 1840.7832      | 920.8952         | 1839.7991      | 920.4032         | G    | 1166.6052 | 583.8062        | 1149.5786      | 575.2930         | 1148.5946      | 574.8009         | 10 |
| 14 | 1972.8366 | 986.9220        | 1955.8101      | 978.4087         | 1954.8261      | 977.9167         | D    | 1109.5837 | 555.2955        | 1092.5572      | 546.7822         | 1091.5732      | 546.2902         | 9  |
| 15 | 2100.9316 | 1050.9694       | 2083.9051      | 1042.4562        | 2082.9210      | 1041.9642        | K    | 994.5568  | 497.7820        | 977.5302       | 489.2688         | 976.5462       | 488.7767         | 8  |
| 16 | 2229.0266 | 1115.0169       | 2212.0000      | 1106.5037        | 2211.0160      | 1106.0116        | K    | 866.4618  | 433.7345        | 849.4353       | 425.2213         | 848.4512       | 424.7293         | 7  |
| 17 | 2358.0692 | 1179.5382       | 2341.0426      | 1171.0249        | 2340.0586      | 1170.5329        | E    | 738.3668  | 369.6871        | 721.3403       | 361.1738         | 720.3563       | 360.6818         | 6  |
| 18 | 2415.0906 | 1208.0490       | 2398.0641      | 1199.5357        | 2397.0801      | 1199.0437        | G    | 609.3243  | 305.1658        | 592.2977       | 296.6525         | 591.3137       | 296.1605         | 5  |
| 19 | 2544.1332 | 1272.5703       | 2527.1067      | 1264.0570        | 2526.1227      | 1263.5650        | E    | 552.3028  | 276.6550        | 535.2762       | 268.1418         | 534.2922       | 267.6498         | 4  |
| 20 | 2707.1966 | 1354.1019       | 2690.1700      | 1345.5886        | 2689.1860      | 1345.0966        | Y    | 423.2602  | 212.1337        | 406.2336       | 203.6205         |                |                  | 3  |
| 21 | 2820.2806 | 1410.6439       | 2803.2541      | 1402.1307        | 2802.2701      | 1401.6387        | I    | 260.1969  | 130.6021        | 243.1703       | 122.0888         |                |                  | 2  |
| 22 |           |                 |                |                  |                |                  | K    | 147.1128  | 74.0600         | 130.0863       | 65.5468          |                |                  | 1  |

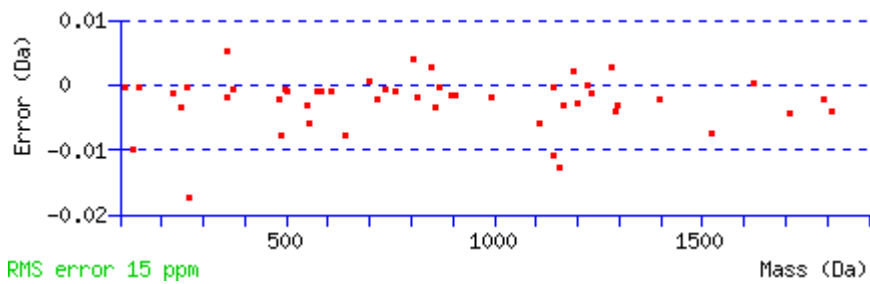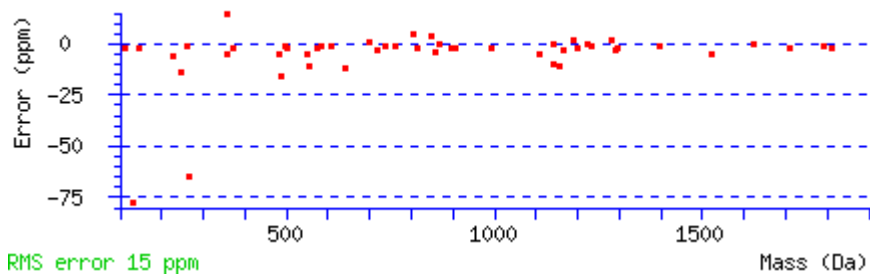

MS/MS Fragmentation of **SEEKPKEGVKTENDHNLK**Found in **P55854**, Small ubiquitin-related modifier 3 OS=Homo sapiens GN=SUMO3 PE=1 SV=2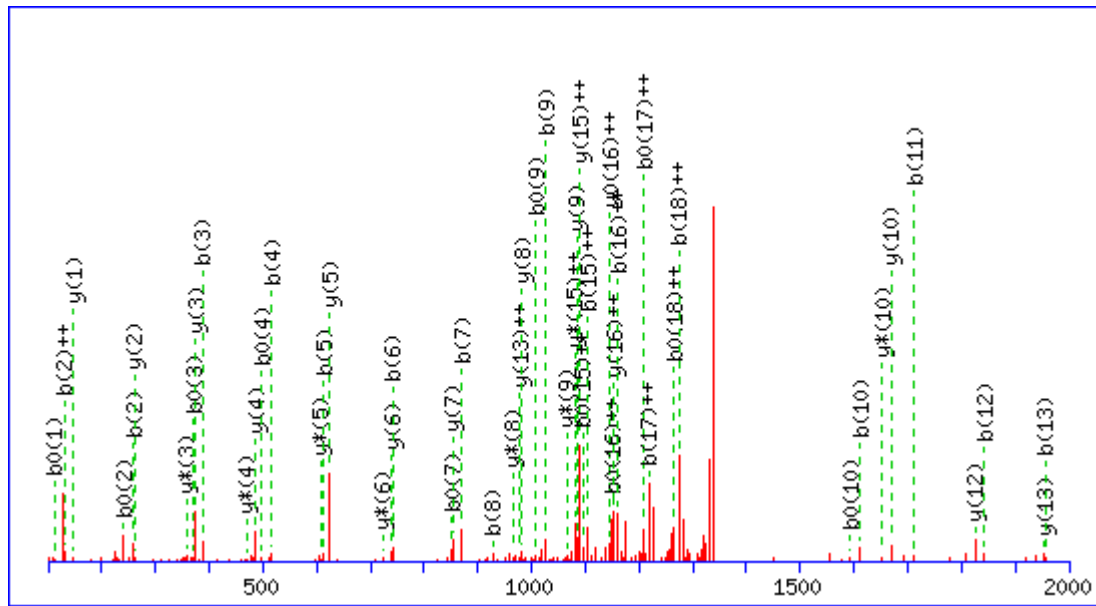

Monoisotopic mass of neutral peptide Mr(calc): 2693.3256 Variable modifications: N-term : Acetyl (N-term) K10 : Sumo 3  
(K) Ions Score: 88 Expect: 3.8e-06

| #  | b         | b <sup>++</sup> | b <sup>*</sup> | b <sup>+++</sup> | b <sup>0</sup> | b <sup>0++</sup> | Seq. | y         | y <sup>++</sup> | y <sup>*</sup> | y <sup>+++</sup> | y <sup>0</sup> | y <sup>0++</sup> | #  |
|----|-----------|-----------------|----------------|------------------|----------------|------------------|------|-----------|-----------------|----------------|------------------|----------------|------------------|----|
| 1  | 130.0499  | 65.5286         |                |                  | 112.0393       | 56.5233          | S    |           |                 |                |                  |                |                  | 19 |
| 2  | 259.0925  | 130.0499        |                |                  | 241.0819       | 121.0446         | E    | 2565.2903 | 1283.1488       | 2548.2638      | 1274.6355        | 2547.2798      | 1274.1435        | 18 |
| 3  | 388.1351  | 194.5712        |                |                  | 370.1245       | 185.5659         | E    | 2436.2477 | 1218.6275       | 2419.2212      | 1210.1142        | 2418.2372      | 1209.6222        | 17 |
| 4  | 516.2300  | 258.6186        | 499.2035       | 250.1054         | 498.2195       | 249.6134         | K    | 2307.2051 | 1154.1062       | 2290.1786      | 1145.5929        | 2289.1946      | 1145.1009        | 16 |
| 5  | 613.2828  | 307.1450        | 596.2562       | 298.6318         | 595.2722       | 298.1397         | P    | 2179.1102 | 1090.0587       | 2162.0836      | 1081.5455        | 2161.0996      | 1081.0534        | 15 |
| 6  | 741.3777  | 371.1925        | 724.3512       | 362.6792         | 723.3672       | 362.1872         | K    | 2082.0574 | 1041.5323       | 2065.0309      | 1033.0191        | 2064.0469      | 1032.5271        | 14 |
| 7  | 870.4203  | 435.7138        | 853.3938       | 427.2005         | 852.4098       | 426.7085         | E    | 1953.9625 | 977.4849        | 1936.9359      | 968.9716         | 1935.9519      | 968.4796         | 13 |
| 8  | 927.4418  | 464.2245        | 910.4153       | 455.7113         | 909.4312       | 455.2193         | G    | 1824.9199 | 912.9636        | 1807.8933      | 904.4503         | 1806.9093      | 903.9583         | 12 |
| 9  | 1026.5102 | 513.7587        | 1009.4837      | 505.2455         | 1008.4997      | 504.7535         | V    | 1767.8984 | 884.4528        | 1750.8719      | 875.9396         | 1749.8878      | 875.4476         | 11 |
| 10 | 1611.7973 | 806.4023        | 1594.7707      | 797.8890         | 1593.7867      | 797.3970         | K    | 1668.8300 | 834.9186        | 1651.8034      | 826.4054         | 1650.8194      | 825.9133         | 10 |
| 11 | 1712.8450 | 856.9261        | 1695.8184      | 848.4128         | 1694.8344      | 847.9208         | T    | 1083.5429 | 542.2751        | 1066.5164      | 533.7618         | 1065.5323      | 533.2698         | 9  |
| 12 | 1841.8876 | 921.4474        | 1824.8610      | 912.9341         | 1823.8770      | 912.4421         | E    | 982.4952  | 491.7513        | 965.4687       | 483.2380         | 964.4847       | 482.7460         | 8  |
| 13 | 1955.9305 | 978.4689        | 1938.9039      | 969.9556         | 1937.9199      | 969.4636         | N    | 853.4526  | 427.2300        | 836.4261       | 418.7167         | 835.4421       | 418.2247         | 7  |
| 14 | 2070.9574 | 1035.9824       | 2053.9309      | 1027.4691        | 2052.9469      | 1026.9771        | D    | 739.4097  | 370.2085        | 722.3832       | 361.6952         | 721.3991       | 361.2032         | 6  |
| 15 | 2208.0163 | 1104.5118       | 2190.9898      | 1095.9985        | 2190.0058      | 1095.5065        | H    | 624.3828  | 312.6950        | 607.3562       | 304.1817         |                |                  | 5  |
| 16 | 2321.1004 | 1161.0538       | 2304.0739      | 1152.5406        | 2303.0898      | 1152.0486        | I    | 487.3239  | 244.1656        | 470.2973       | 235.6523         |                |                  | 4  |
| 17 | 2435.1433 | 1218.0753       | 2418.1168      | 1209.5620        | 2417.1328      | 1209.0700        | N    | 374.2398  | 187.6235        | 357.2132       | 179.1103         |                |                  | 3  |
| 18 | 2548.2274 | 1274.6173       | 2531.2009      | 1266.1041        | 2530.2168      | 1265.6121        | L    | 260.1969  | 130.6021        | 243.1703       | 122.0888         |                |                  | 2  |
| 19 |           |                 |                |                  |                |                  | K    | 147.1128  | 74.0600         | 130.0863       | 65.5468          |                |                  | 1  |

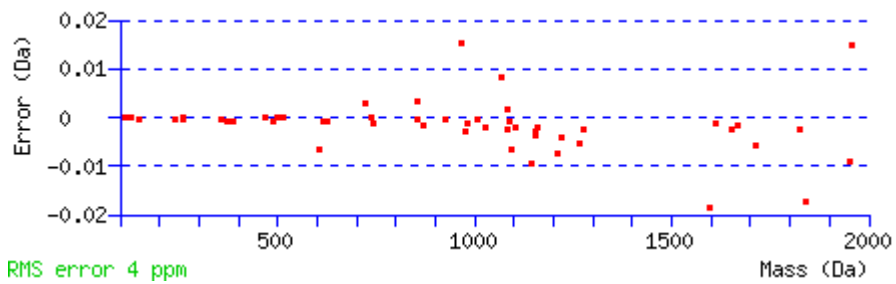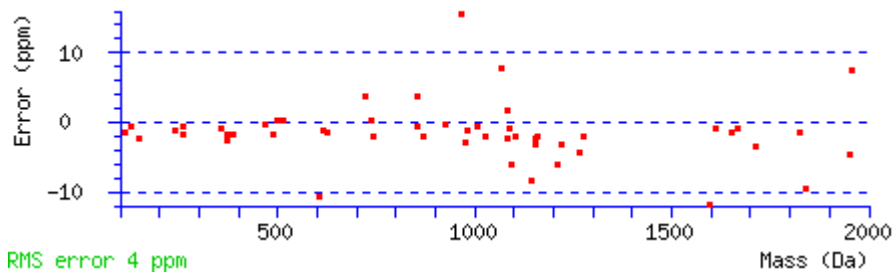

IDENTIFICATION 47

MS/MS Fragmentation of **SEEKPKEGVKTENDHINLK**

Found in **P55854**, Small ubiquitin-related modifier 3 OS=Homo sapiens GN=SUMO3 PE=1 SV=2

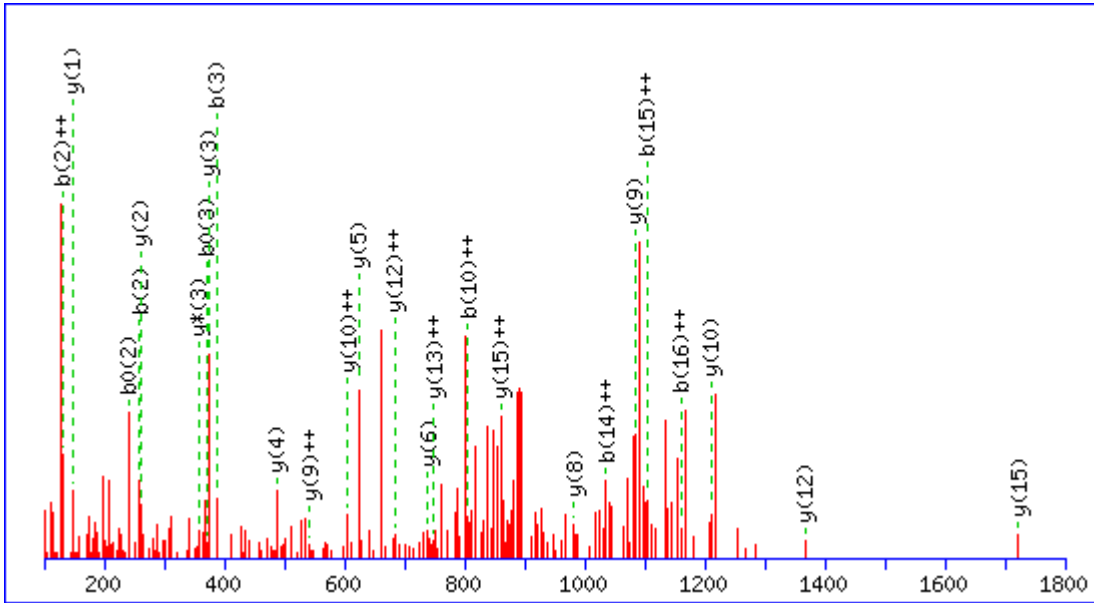

Monoisotopic mass of neutral peptide  $M_r(\text{calc})$ : 2693.3256 Variable modifications: N-term : Acetyl (N-term) K4 : Sumo 3 (K) Ions Score: 23 Expect: 14

| #  | b         | b <sup>++</sup> | b <sup>*</sup> | b <sup>+++</sup> | b <sup>0</sup> | b <sup>0++</sup> | Seq. | y         | y <sup>++</sup> | y <sup>*</sup> | y <sup>+++</sup> | y <sup>0</sup> | y <sup>0++</sup> | #  |
|----|-----------|-----------------|----------------|------------------|----------------|------------------|------|-----------|-----------------|----------------|------------------|----------------|------------------|----|
| 1  | 130.0499  | 65.5286         |                |                  | 112.0393       | 56.5233          | S    |           |                 |                |                  |                |                  | 19 |
| 2  | 259.0925  | 130.0499        |                |                  | 241.0819       | 121.0446         | E    | 2565.2903 | 1283.1488       | 2548.2638      | 1274.6355        | 2547.2798      | 1274.1435        | 18 |
| 3  | 388.1351  | 194.5712        |                |                  | 370.1245       | 185.5659         | E    | 2436.2477 | 1218.6275       | 2419.2212      | 1210.1142        | 2418.2372      | 1209.6222        | 17 |
| 4  | 973.4221  | 487.2147        | 956.3956       | 478.7014         | 955.4116       | 478.2094         | K    | 2307.2051 | 1154.1062       | 2290.1786      | 1145.5929        | 2289.1946      | 1145.1009        | 16 |
| 5  | 1070.4749 | 535.7411        | 1053.4483      | 527.2278         | 1052.4643      | 526.7358         | P    | 1721.9181 | 861.4627        | 1704.8915      | 852.9494         | 1703.9075      | 852.4574         | 15 |
| 6  | 1198.5699 | 599.7886        | 1181.5433      | 591.2753         | 1180.5593      | 590.7833         | K    | 1624.8653 | 812.9363        | 1607.8388      | 804.4230         | 1606.8547      | 803.9310         | 14 |
| 7  | 1327.6124 | 664.3099        | 1310.5859      | 655.7966         | 1309.6019      | 655.3046         | E    | 1496.7703 | 748.8888        | 1479.7438      | 740.3755         | 1478.7598      | 739.8835         | 13 |
| 8  | 1384.6339 | 692.8206        | 1367.6074      | 684.3073         | 1366.6233      | 683.8153         | G    | 1367.7278 | 684.3675        | 1350.7012      | 675.8542         | 1349.7172      | 675.3622         | 12 |
| 9  | 1483.7023 | 742.3548        | 1466.6758      | 733.8415         | 1465.6918      | 733.3495         | V    | 1310.7063 | 655.8568        | 1293.6797      | 647.3435         | 1292.6957      | 646.8515         | 11 |
| 10 | 1611.7973 | 806.4023        | 1594.7707      | 797.8890         | 1593.7867      | 797.3970         | K    | 1211.6379 | 606.3226        | 1194.6113      | 597.8093         | 1193.6273      | 597.3173         | 10 |
| 11 | 1712.8450 | 856.9261        | 1695.8184      | 848.4128         | 1694.8344      | 847.9208         | T    | 1083.5429 | 542.2751        | 1066.5164      | 533.7618         | 1065.5323      | 533.2698         | 9  |
| 12 | 1841.8876 | 921.4474        | 1824.8610      | 912.9341         | 1823.8770      | 912.4421         | E    | 982.4952  | 491.7513        | 965.4687       | 483.2380         | 964.4847       | 482.7460         | 8  |
| 13 | 1955.9305 | 978.4689        | 1938.9039      | 969.9556         | 1937.9199      | 969.4636         | N    | 853.4526  | 427.2300        | 836.4261       | 418.7167         | 835.4421       | 418.2247         | 7  |
| 14 | 2070.9574 | 1035.9824       | 2053.9309      | 1027.4691        | 2052.9469      | 1026.9771        | D    | 739.4097  | 370.2085        | 722.3832       | 361.6952         | 721.3991       | 361.2032         | 6  |
| 15 | 2208.0163 | 1104.5118       | 2190.9898      | 1095.9985        | 2190.0058      | 1095.5065        | H    | 624.3828  | 312.6950        | 607.3562       | 304.1817         |                |                  | 5  |
| 16 | 2321.1004 | 1161.0538       | 2304.0739      | 1152.5406        | 2303.0898      | 1152.0486        | I    | 487.3239  | 244.1656        | 470.2973       | 235.6523         |                |                  | 4  |
| 17 | 2435.1433 | 1218.0753       | 2418.1168      | 1209.5620        | 2417.1328      | 1209.0700        | N    | 374.2398  | 187.6235        | 357.2132       | 179.1103         |                |                  | 3  |
| 18 | 2548.2274 | 1274.6173       | 2531.2009      | 1266.1041        | 2530.2168      | 1265.6121        | L    | 260.1969  | 130.6021        | 243.1703       | 122.0888         |                |                  | 2  |
| 19 |           |                 |                |                  |                |                  | K    | 147.1128  | 74.0600         | 130.0863       | 65.5468          |                |                  | 1  |

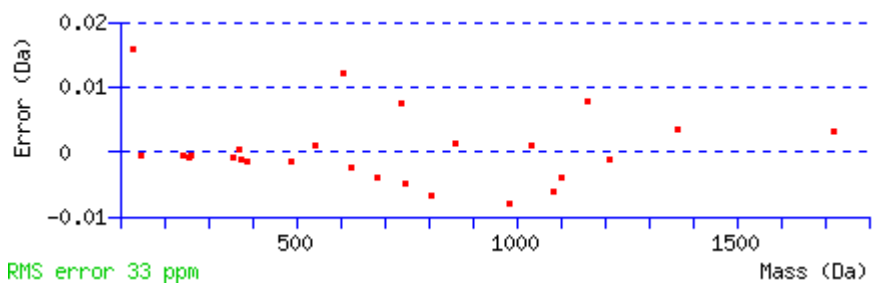

RMS error 33 ppm

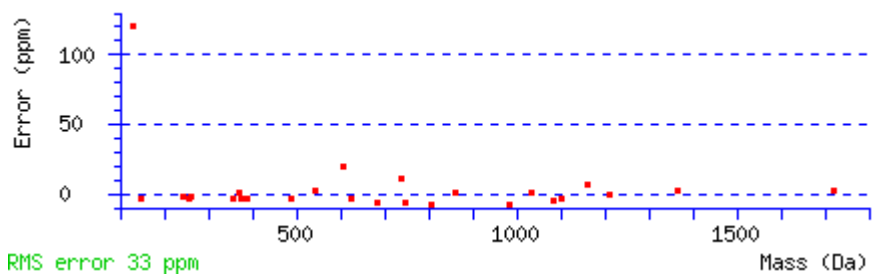

RMS error 33 ppm





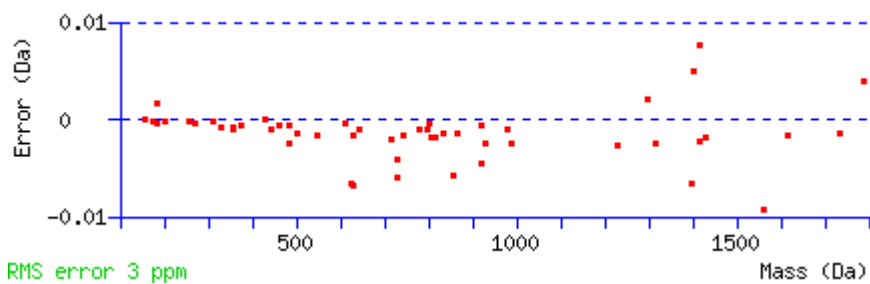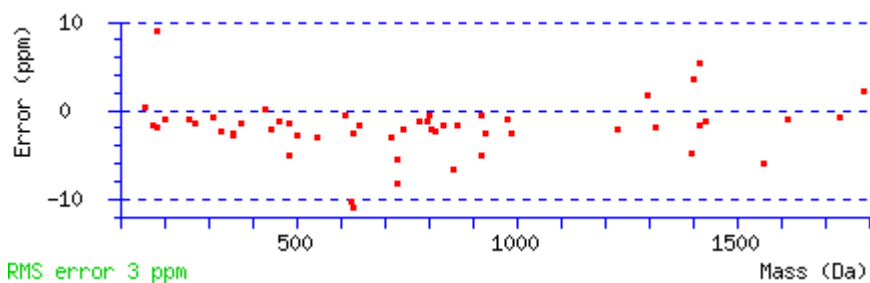

MS/MS Fragmentation of **TVIKKEEK**

Found in **Q14151**, Scaffold attachment factor B2 OS=Homo sapiens GN=SAFB2 PE=1 SV=1

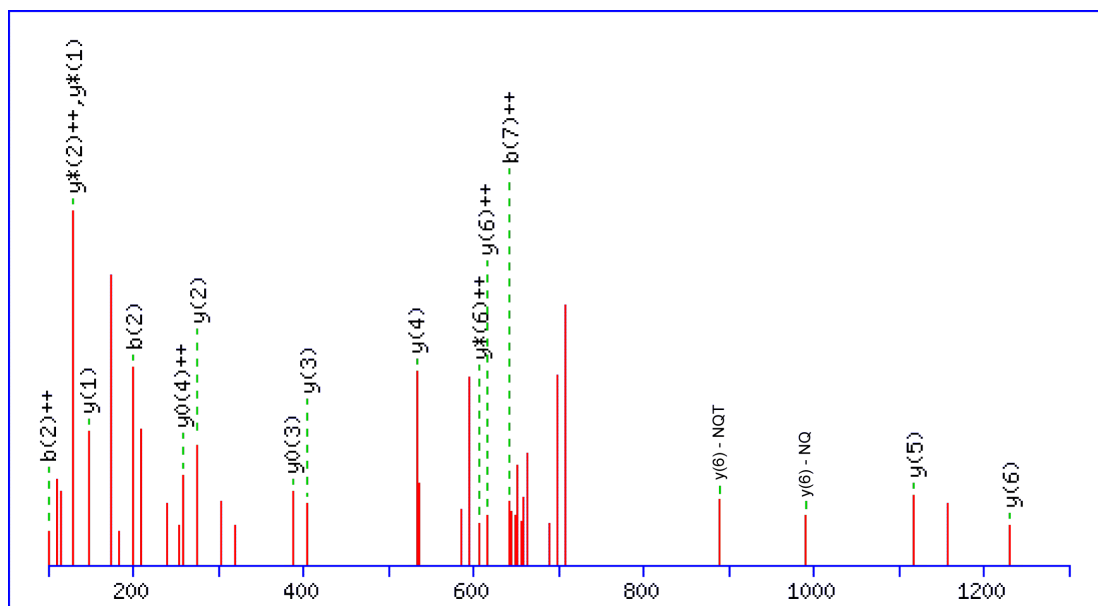

Monoisotopic mass of neutral peptide  $M_r(\text{calc})$ : 1430.7729

Variable modifications:

K4 : Sumo 3 (K)

Ions Score: 29 Expect: 0.45

| # | b         | b <sup>++</sup> | b <sup>*</sup> | b <sup>+++</sup> | b <sup>0</sup> | b <sup>0++</sup> | Seq. | y         | y <sup>++</sup> | y <sup>*</sup> | y <sup>+++</sup> | y <sup>0</sup> | y <sup>0++</sup> | # |
|---|-----------|-----------------|----------------|------------------|----------------|------------------|------|-----------|-----------------|----------------|------------------|----------------|------------------|---|
| 1 | 102.0550  | 51.5311         |                |                  | 84.0444        | 42.5258          | T    |           |                 |                |                  |                |                  | 8 |
| 2 | 201.1234  | 101.0653        |                |                  | 183.1128       | 92.0600          | V    | 1330.7325 | 665.8699        | 1313.7060      | 657.3566         | 1312.7219      | 656.8646         | 7 |
| 3 | 314.2074  | 157.6074        |                |                  | 296.1969       | 148.6021         | I    | 1231.6641 | 616.3357        | 1214.6375      | 607.8224         | 1213.6535      | 607.3304         | 6 |
| 4 | 899.4945  | 450.2509        | 882.4680       | 441.7376         | 881.4839       | 441.2456         | K    | 1118.5800 | 559.7937        | 1101.5535      | 551.2804         | 1100.5695      | 550.7884         | 5 |
| 5 | 1027.5895 | 514.2984        | 1010.5629      | 505.7851         | 1009.5789      | 505.2931         | K    | 533.2930  | 267.1501        | 516.2664       | 258.6368         | 515.2824       | 258.1448         | 4 |
| 6 | 1156.6321 | 578.8197        | 1139.6055      | 570.3064         | 1138.6215      | 569.8144         | E    | 405.1980  | 203.1026        | 388.1714       | 194.5894         | 387.1874       | 194.0974         | 3 |
| 7 | 1285.6747 | 643.3410        | 1268.6481      | 634.8277         | 1267.6641      | 634.3357         | E    | 276.1554  | 138.5813        | 259.1288       | 130.0681         | 258.1448       | 129.5761         | 2 |
| 8 |           |                 |                |                  |                |                  | K    | 147.1128  | 74.0600         | 130.0863       | 65.5468          |                |                  | 1 |

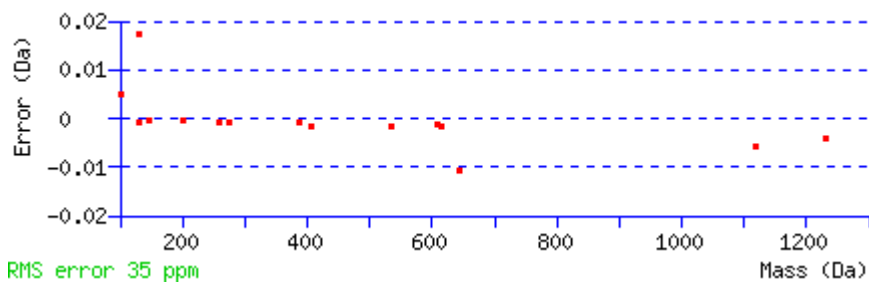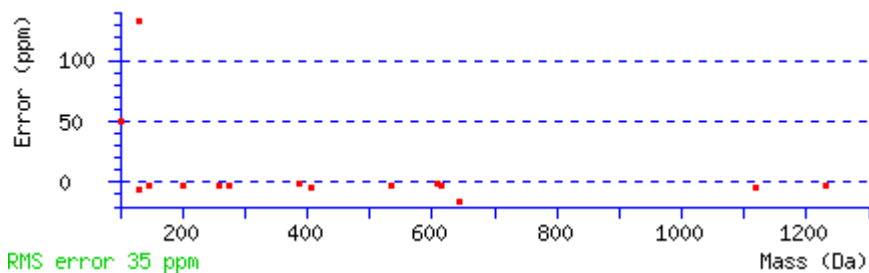

IDENTIFICATION 50

MS/MS Fragmentation of **VKEDPDGEHAR**

Found in **P52272**, Heterogeneous nuclear ribonucleoprotein M OS=Homo sapiens GN=HNRNPM PE=1 SV=3

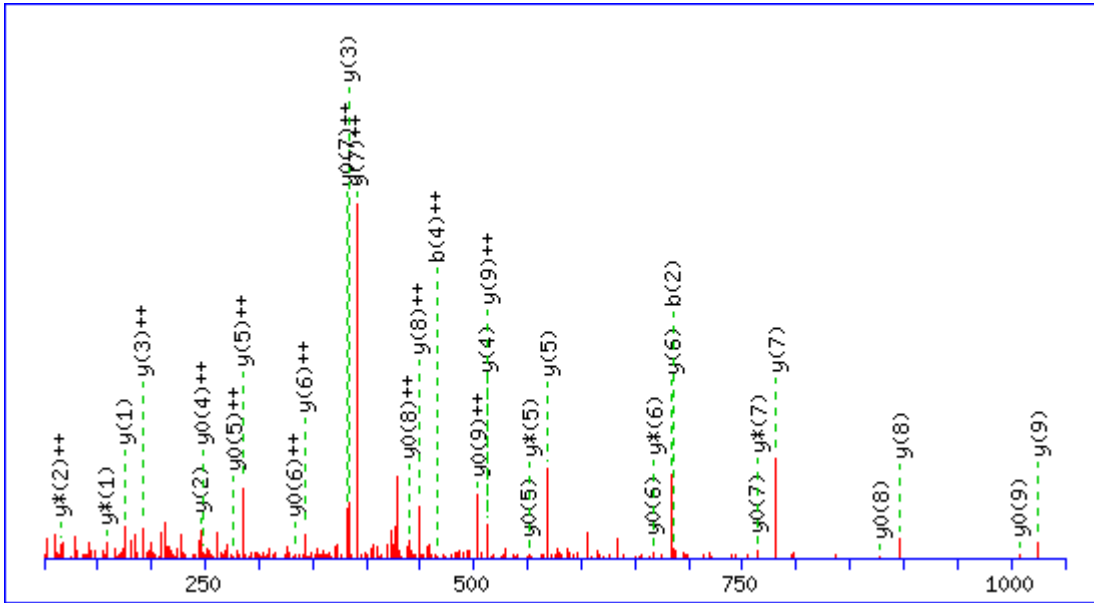

Monoisotopic mass of neutral peptide  $M_r(\text{calc})$ : 1708.7765

Variable modifications:

K2 : Sumo 3 (K)

Ions Score: 61 Expect: 0.0013

| #  | b         | b <sup>++</sup> | b <sup>*</sup> | b <sup>+++</sup> | b <sup>0</sup> | b <sup>0++</sup> | Seq. | y         | y <sup>++</sup> | y <sup>*</sup> | y <sup>+++</sup> | y <sup>0</sup> | y <sup>0++</sup> | #  |
|----|-----------|-----------------|----------------|------------------|----------------|------------------|------|-----------|-----------------|----------------|------------------|----------------|------------------|----|
| 1  | 100.0757  | 50.5415         |                |                  |                |                  | V    |           |                 |                |                  |                |                  | 11 |
| 2  | 685.3628  | 343.1850        | 668.3362       | 334.6717         |                |                  | K    | 1610.7154 | 805.8613        | 1593.6888      | 797.3480         | 1592.7048      | 796.8560         | 10 |
| 3  | 814.4054  | 407.7063        | 797.3788       | 399.1930         | 796.3948       | 398.7010         | E    | 1025.4283 | 513.2178        | 1008.4017      | 504.7045         | 1007.4177      | 504.2125         | 9  |
| 4  | 929.4323  | 465.2198        | 912.4058       | 456.7065         | 911.4217       | 456.2145         | D    | 896.3857  | 448.6965        | 879.3591       | 440.1832         | 878.3751       | 439.6912         | 8  |
| 5  | 1026.4851 | 513.7462        | 1009.4585      | 505.2329         | 1008.4745      | 504.7409         | P    | 781.3587  | 391.1830        | 764.3322       | 382.6697         | 763.3482       | 382.1777         | 7  |
| 6  | 1141.5120 | 571.2596        | 1124.4855      | 562.7464         | 1123.5014      | 562.2544         | D    | 684.3060  | 342.6566        | 667.2794       | 334.1434         | 666.2954       | 333.6513         | 6  |
| 7  | 1198.5335 | 599.7704        | 1181.5069      | 591.2571         | 1180.5229      | 590.7651         | G    | 569.2790  | 285.1432        | 552.2525       | 276.6299         | 551.2685       | 276.1379         | 5  |
| 8  | 1327.5761 | 664.2917        | 1310.5495      | 655.7784         | 1309.5655      | 655.2864         | E    | 512.2576  | 256.6324        | 495.2310       | 248.1191         | 494.2470       | 247.6271         | 4  |
| 9  | 1464.6350 | 732.8211        | 1447.6084      | 724.3079         | 1446.6244      | 723.8158         | H    | 383.2150  | 192.1111        | 366.1884       | 183.5979         |                |                  | 3  |
| 10 | 1535.6721 | 768.3397        | 1518.6455      | 759.8264         | 1517.6615      | 759.3344         | A    | 246.1561  | 123.5817        | 229.1295       | 115.0684         |                |                  | 2  |
| 11 |           |                 |                |                  |                |                  | R    | 175.1190  | 88.0631         | 158.0924       | 79.5498          |                |                  | 1  |

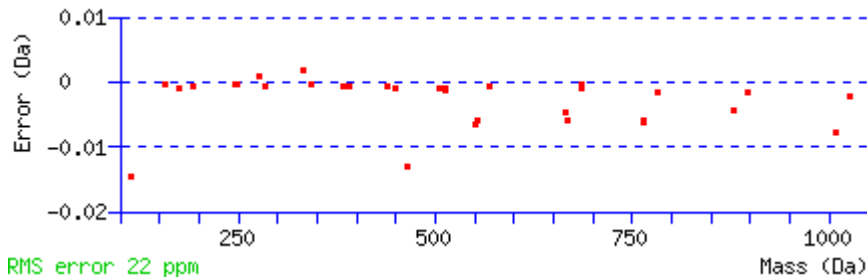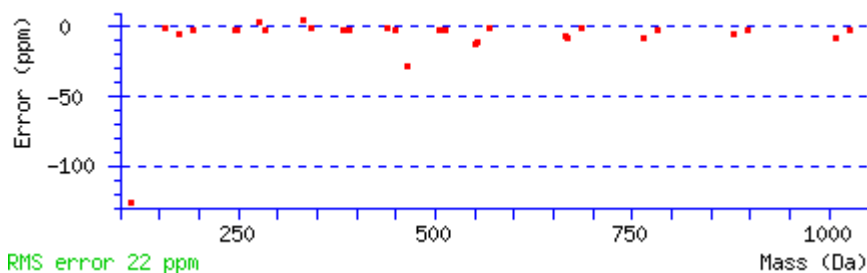



IDENTIFICATION 52

MS/MS Fragmentation of **VKVEEEEEKVAEEETSVK**

Found in **Q9Y2X3**, Nucleolar protein 58 OS=Homo sapiens GN=NOP58 PE=1 SV=1

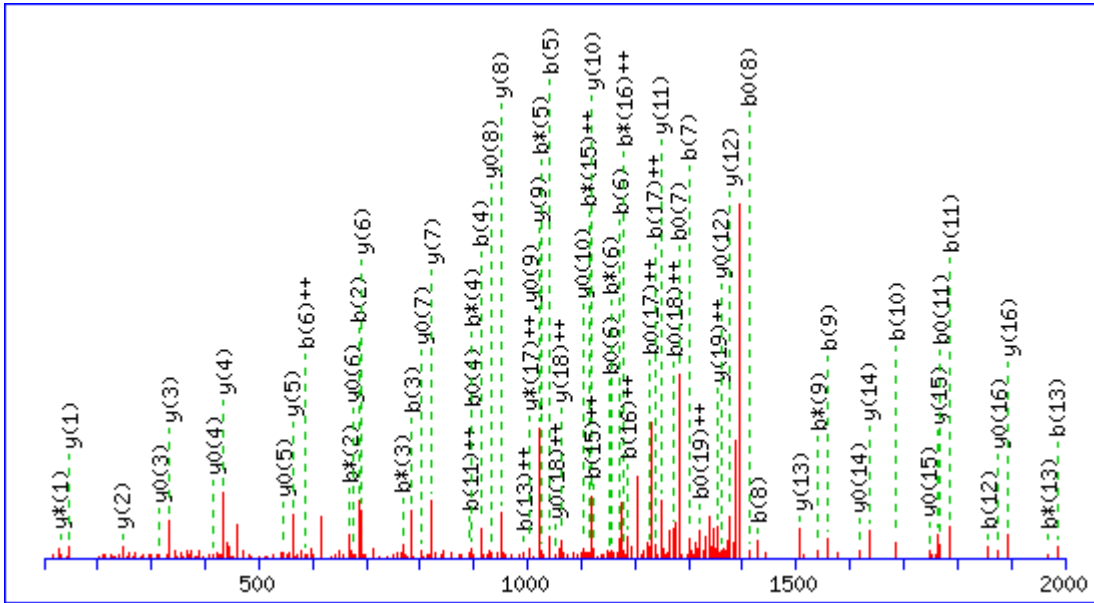

Monoisotopic mass of neutral peptide  $M_r(\text{calc})$ : 2805.3039

Variable modifications:

K2 : Sumo 3 (K)

Ions Score: 124 Expect: 2e-09

| #  | b         | b <sup>++</sup> | b <sup>*</sup> | b <sup>+++</sup> | b <sup>0</sup> | b <sup>0++</sup> | Seq. | y         | y <sup>++</sup> | y <sup>*</sup> | y <sup>+++</sup> | y <sup>0</sup> | y <sup>0++</sup> | #  |
|----|-----------|-----------------|----------------|------------------|----------------|------------------|------|-----------|-----------------|----------------|------------------|----------------|------------------|----|
| 1  | 100.0757  | 50.5415         |                |                  |                |                  | V    |           |                 |                |                  |                |                  | 20 |
| 2  | 685.3628  | 343.1850        | 668.3362       | 334.6717         |                |                  | K    | 2707.2428 | 1354.1251       | 2690.2163      | 1345.6118        | 2689.2323      | 1345.1198        | 19 |
| 3  | 784.4312  | 392.7192        | 767.4046       | 384.2060         |                |                  | V    | 2121.9558 | 1061.4815       | 2104.9292      | 1052.9682        | 2103.9452      | 1052.4762        | 18 |
| 4  | 913.4738  | 457.2405        | 896.4472       | 448.7272         | 895.4632       | 448.2352         | E    | 2022.8873 | 1011.9473       | 2005.8608      | 1003.4340        | 2004.8768      | 1002.9420        | 17 |
| 5  | 1042.5164 | 521.7618        | 1025.4898      | 513.2485         | 1024.5058      | 512.7565         | E    | 1893.8448 | 947.4260        | 1876.8182      | 938.9127         | 1875.8342      | 938.4207         | 16 |
| 6  | 1171.5590 | 586.2831        | 1154.5324      | 577.7698         | 1153.5484      | 577.2778         | E    | 1764.8022 | 882.9047        | 1747.7756      | 874.3914         | 1746.7916      | 873.8994         | 15 |
| 7  | 1300.6016 | 650.8044        | 1283.5750      | 642.2911         | 1282.5910      | 641.7991         | E    | 1635.7596 | 818.3834        | 1618.7330      | 809.8701         | 1617.7490      | 809.3781         | 14 |
| 8  | 1429.6441 | 715.3257        | 1412.6176      | 706.8124         | 1411.6336      | 706.3204         | E    | 1506.7170 | 753.8621        | 1489.6904      | 745.3489         | 1488.7064      | 744.8568         | 13 |
| 9  | 1558.6867 | 779.8470        | 1541.6602      | 771.3337         | 1540.6762      | 770.8417         | E    | 1377.6744 | 689.3408        | 1360.6478      | 680.8276         | 1359.6638      | 680.3355         | 12 |
| 10 | 1686.7817 | 843.8945        | 1669.7552      | 835.3812         | 1668.7711      | 834.8892         | K    | 1248.6318 | 624.8195        | 1231.6052      | 616.3063         | 1230.6212      | 615.8142         | 11 |
| 11 | 1785.8501 | 893.4287        | 1768.8236      | 884.9154         | 1767.8395      | 884.4234         | V    | 1120.5368 | 560.7721        | 1103.5103      | 552.2588         | 1102.5263      | 551.7668         | 10 |
| 12 | 1856.8872 | 928.9473        | 1839.8607      | 920.4340         | 1838.8767      | 919.9420         | A    | 1021.4684 | 511.2378        | 1004.4419      | 502.7246         | 1003.4578      | 502.2326         | 9  |
| 13 | 1985.9298 | 993.4685        | 1968.9033      | 984.9553         | 1967.9193      | 984.4633         | E    | 950.4313  | 475.7193        | 933.4047       | 467.2060         | 932.4207       | 466.7140         | 8  |
| 14 | 2114.9724 | 1057.9898       | 2097.9459      | 1049.4766        | 2096.9618      | 1048.9846        | E    | 821.3887  | 411.1980        | 804.3622       | 402.6847         | 803.3781       | 402.1927         | 7  |
| 15 | 2244.0150 | 1122.5111       | 2226.9885      | 1113.9979        | 2226.0044      | 1113.5059        | E    | 692.3461  | 346.6767        | 675.3196       | 338.1634         | 674.3355       | 337.6714         | 6  |
| 16 | 2373.0576 | 1187.0324       | 2356.0311      | 1178.5192        | 2355.0470      | 1178.0272        | E    | 563.3035  | 282.1554        | 546.2770       | 273.6421         | 545.2930       | 273.1501         | 5  |
| 17 | 2474.1053 | 1237.5563       | 2457.0787      | 1229.0430        | 2456.0947      | 1228.5510        | T    | 434.2609  | 217.6341        | 417.2344       | 209.1208         | 416.2504       | 208.6288         | 4  |
| 18 | 2561.1373 | 1281.0723       | 2544.1108      | 1272.5590        | 2543.1267      | 1272.0670        | S    | 333.2132  | 167.1103        | 316.1867       | 158.5970         | 315.2027       | 158.1050         | 3  |
| 19 | 2660.2057 | 1330.6065       | 2643.1792      | 1322.0932        | 2642.1952      | 1321.6012        | V    | 246.1812  | 123.5942        | 229.1547       | 115.0810         |                |                  | 2  |
| 20 |           |                 |                |                  |                |                  | K    | 147.1128  | 74.0600         | 130.0863       | 65.5468          |                |                  | 1  |

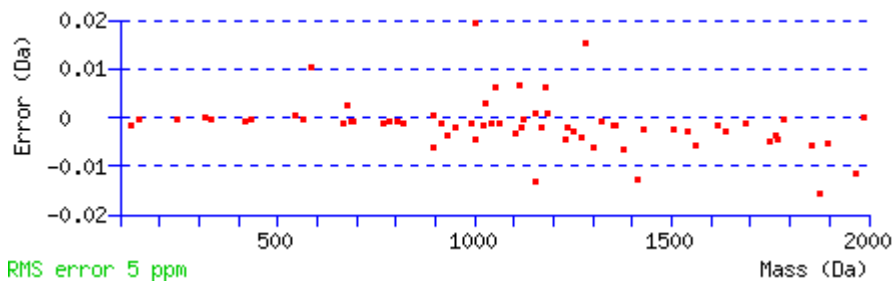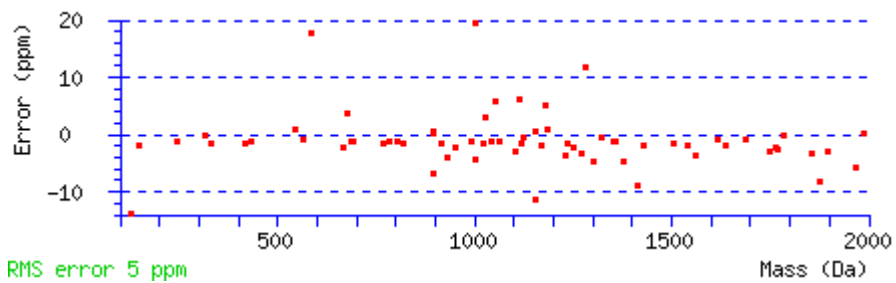

MS/MS Fragmentation of **VLLGETGKEKLPR**Found in **P62280**, 40S ribosomal protein S11 OS=Homo sapiens GN=RPS11 PE=1 SV=3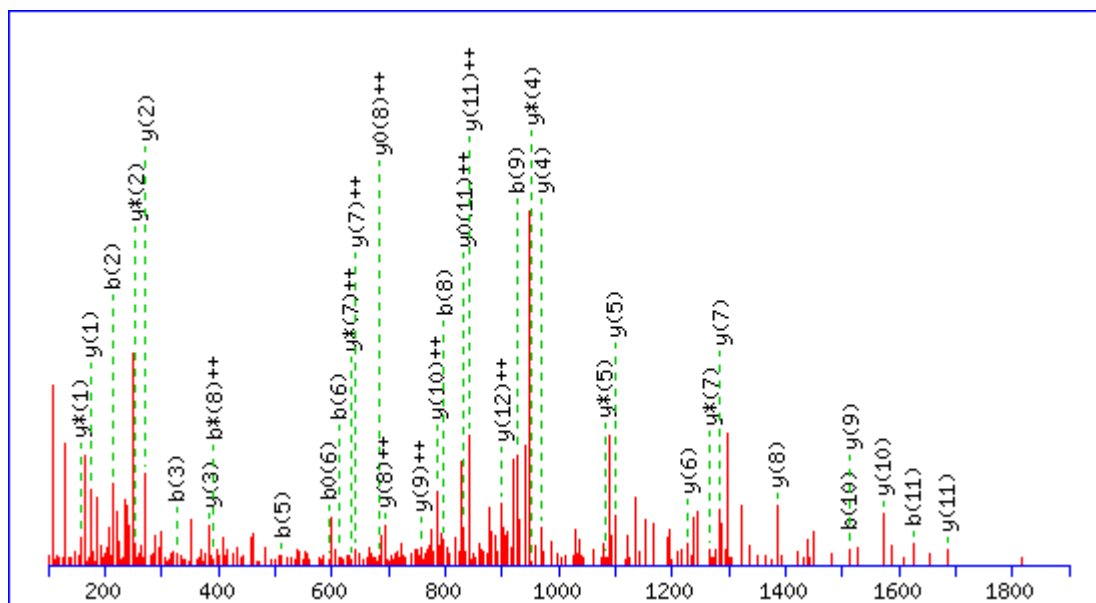Monoisotopic mass of neutral peptide  $M_r(\text{calc})$ :

1896.0428

Variable modifications:

K10 :

Sumo 3 (K)

Ions Score:

24

Expect:

1.3

| #  | b         | b <sup>++</sup> | b <sup>*</sup> | b <sup>+++</sup> | b <sup>0</sup> | b <sup>0++</sup> | Seq. | y         | y <sup>++</sup> | y <sup>*</sup> | y <sup>+++</sup> | y <sup>0</sup> | y <sup>0++</sup> | #  |
|----|-----------|-----------------|----------------|------------------|----------------|------------------|------|-----------|-----------------|----------------|------------------|----------------|------------------|----|
| 1  | 100.0757  | 50.5415         |                |                  |                |                  | V    |           |                 |                |                  |                |                  | 13 |
| 2  | 213.1598  | 107.0835        |                |                  |                |                  | L    | 1797.9817 | 899.4945        | 1780.9552      | 890.9812         | 1779.9712      | 890.4892         | 12 |
| 3  | 326.2438  | 163.6255        |                |                  |                |                  | L    | 1684.8977 | 842.9525        | 1667.8711      | 834.4392         | 1666.8871      | 833.9472         | 11 |
| 4  | 383.2653  | 192.1363        |                |                  |                |                  | G    | 1571.8136 | 786.4104        | 1554.7871      | 777.8972         | 1553.8030      | 777.4052         | 10 |
| 5  | 512.3079  | 256.6576        |                |                  | 494.2973       | 247.6523         | E    | 1514.7921 | 757.8997        | 1497.7656      | 749.3864         | 1496.7816      | 748.8944         | 9  |
| 6  | 613.3556  | 307.1814        |                |                  | 595.3450       | 298.1761         | T    | 1385.7496 | 693.3784        | 1368.7230      | 684.8651         | 1367.7390      | 684.3731         | 8  |
| 7  | 670.3770  | 335.6921        |                |                  | 652.3665       | 326.6869         | G    | 1284.7019 | 642.8546        | 1267.6753      | 634.3413         | 1266.6913      | 633.8493         | 7  |
| 8  | 798.4720  | 399.7396        | 781.4454       | 391.2264         | 780.4614       | 390.7343         | K    | 1227.6804 | 614.3438        | 1210.6539      | 605.8306         | 1209.6698      | 605.3386         | 6  |
| 9  | 927.5146  | 464.2609        | 910.4880       | 455.7477         | 909.5040       | 455.2556         | E    | 1099.5854 | 550.2964        | 1082.5589      | 541.7831         | 1081.5749      | 541.2911         | 5  |
| 10 | 1512.8016 | 756.9045        | 1495.7751      | 748.3912         | 1494.7911      | 747.8992         | K    | 970.5429  | 485.7751        | 953.5163       | 477.2618         |                |                  | 4  |
| 11 | 1625.8857 | 813.4465        | 1608.8592      | 804.9332         | 1607.8751      | 804.4412         | L    | 385.2558  | 193.1315        | 368.2292       | 184.6183         |                |                  | 3  |
| 12 | 1722.9385 | 861.9729        | 1705.9119      | 853.4596         | 1704.9279      | 852.9676         | P    | 272.1717  | 136.5895        | 255.1452       | 128.0762         |                |                  | 2  |
| 13 |           |                 |                |                  |                |                  | R    | 175.1190  | 88.0631         | 158.0924       | 79.5498          |                |                  | 1  |

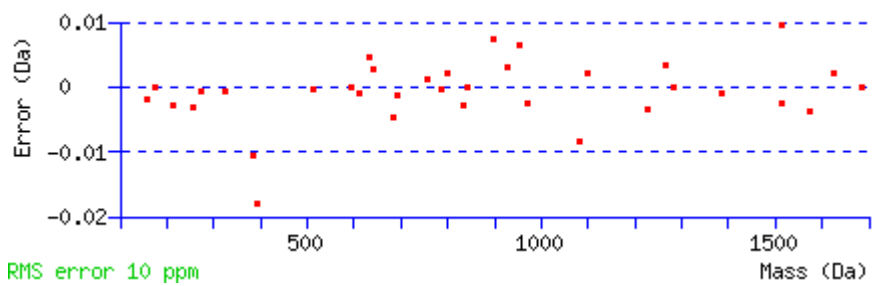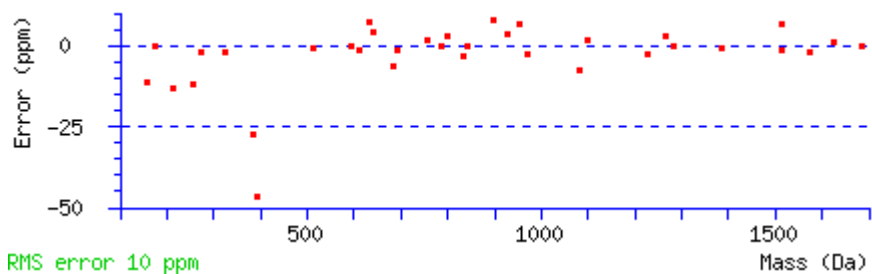



IDENTIFICATION 54

MS/MS Fragmentation of **VQIKQETIESR**

Found in **Q03933**, Heat shock factor protein 2 OS=Homo sapiens GN=HSF2 PE=1 SV=1

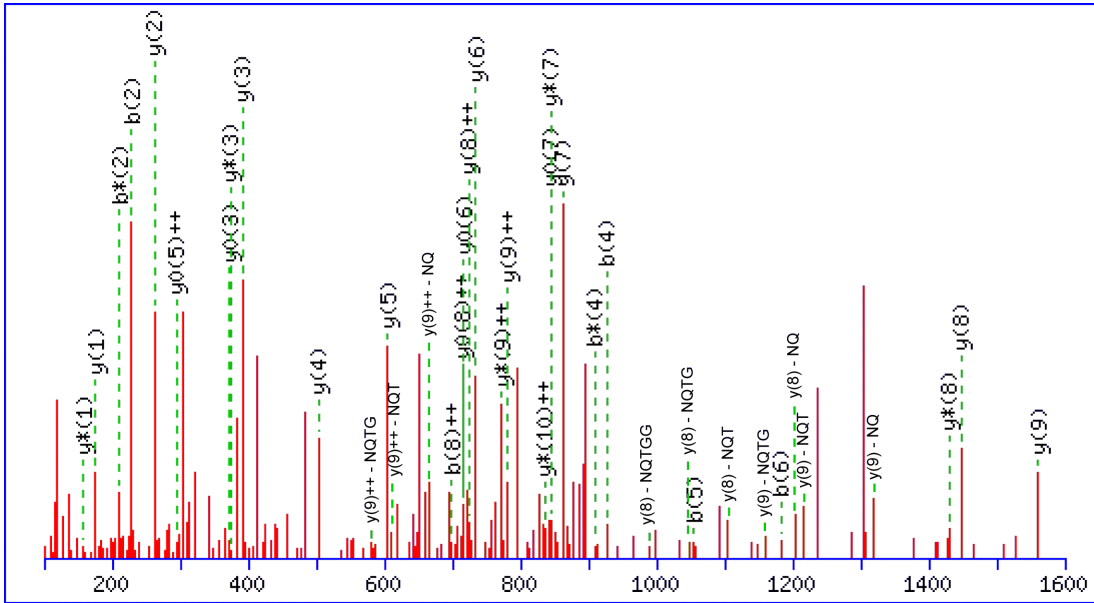

Monoisotopic mass of neutral peptide  $M_r(\text{calc})$ : 1786.9173

Variable modifications:

K4 : Sumo 3 (K)

Ions Score: 43 Expect: 0.058

| #  | b         | b <sup>++</sup> | b <sup>*</sup> | b <sup>+++</sup> | b <sup>0</sup> | b <sup>0++</sup> | Seq. | y         | y <sup>++</sup> | y <sup>*</sup> | y <sup>*++</sup> | y <sup>0</sup> | y <sup>0++</sup> | #  |
|----|-----------|-----------------|----------------|------------------|----------------|------------------|------|-----------|-----------------|----------------|------------------|----------------|------------------|----|
| 1  | 100.0757  | 50.5415         |                |                  |                |                  | V    |           |                 |                |                  |                |                  | 11 |
| 2  | 228.1343  | 114.5708        | 211.1077       | 106.0575         |                |                  | Q    | 1688.8562 | 844.9317        | 1671.8297      | 836.4185         | 1670.8456      | 835.9265         | 10 |
| 3  | 341.2183  | 171.1128        | 324.1918       | 162.5995         |                |                  | I    | 1560.7976 | 780.9025        | 1543.7711      | 772.3892         | 1542.7871      | 771.8972         | 9  |
| 4  | 926.5054  | 463.7563        | 909.4789       | 455.2431         |                |                  | K    | 1447.7136 | 724.3604        | 1430.6870      | 715.8471         | 1429.7030      | 715.3551         | 8  |
| 5  | 1054.5640 | 527.7856        | 1037.5374      | 519.2724         |                |                  | Q    | 862.4265  | 431.7169        | 845.3999       | 423.2036         | 844.4159       | 422.7116         | 7  |
| 6  | 1183.6066 | 592.3069        | 1166.5800      | 583.7937         | 1165.5960      | 583.3016         | E    | 734.3679  | 367.6876        | 717.3414       | 359.1743         | 716.3573       | 358.6823         | 6  |
| 7  | 1284.6543 | 642.8308        | 1267.6277      | 634.3175         | 1266.6437      | 633.8255         | T    | 605.3253  | 303.1663        | 588.2988       | 294.6530         | 587.3148       | 294.1610         | 5  |
| 8  | 1397.7383 | 699.3728        | 1380.7118      | 690.8595         | 1379.7278      | 690.3675         | I    | 504.2776  | 252.6425        | 487.2511       | 244.1292         | 486.2671       | 243.6372         | 4  |
| 9  | 1526.7809 | 763.8941        | 1509.7544      | 755.3808         | 1508.7703      | 754.8888         | E    | 391.1936  | 196.1004        | 374.1670       | 187.5872         | 373.1830       | 187.0951         | 3  |
| 10 | 1613.8129 | 807.4101        | 1596.7864      | 798.8968         | 1595.8024      | 798.4048         | S    | 262.1510  | 131.5791        | 245.1244       | 123.0659         | 244.1404       | 122.5738         | 2  |
| 11 |           |                 |                |                  |                |                  | R    | 175.1190  | 88.0631         | 158.0924       | 79.5498          |                |                  | 1  |

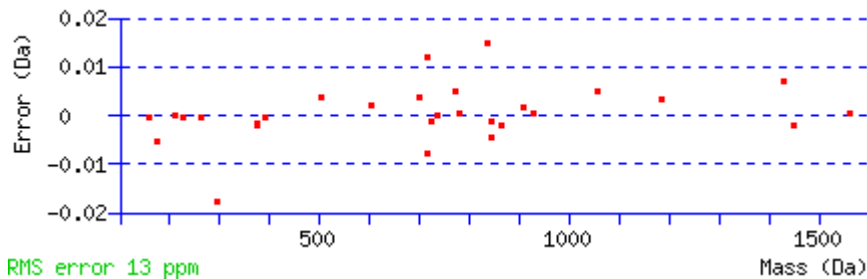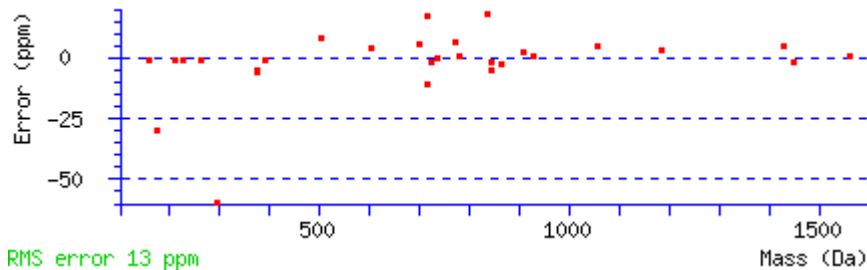



IDENTIFICATION 55

MS/MS Fragmentation of **AAGVEAAAEEVAATEIKMEEESGAPGVPSGNGAPGPKGEGERPAQNEK**

Found in **P52272**, Heterogeneous nuclear ribonucleoprotein M OS=Homo sapiens GN=HNRNPM PE=1 SV=3

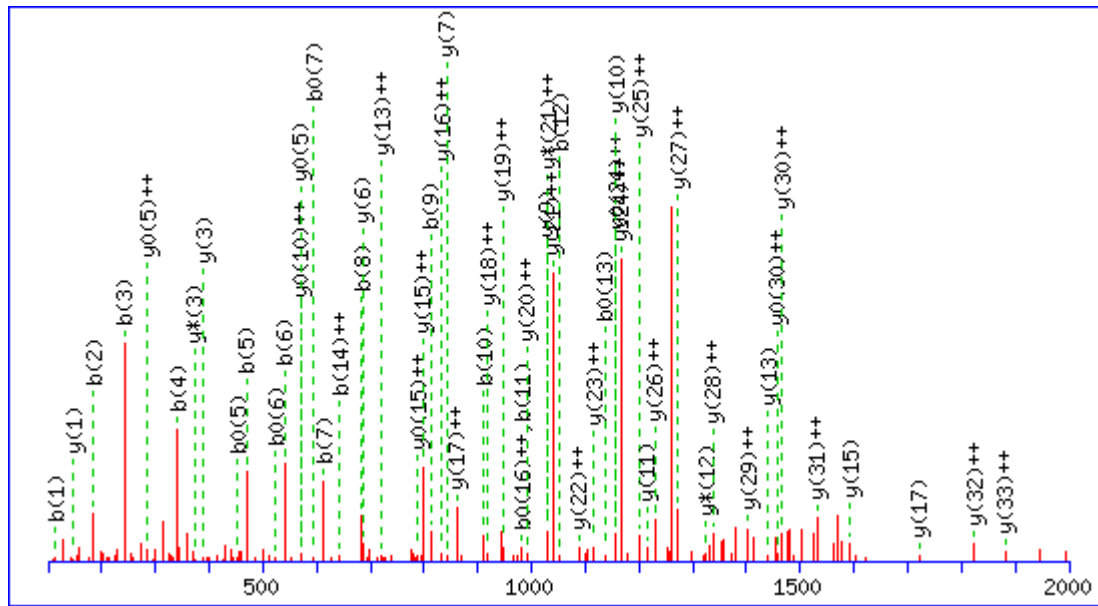

Monoisotopic mass of neutral peptide  $M_r(\text{calc})$ : 5043.3751 Variable modifications: N-term : Acetyl (N-term) K16 : Sumo 3 (K) Ions Score: 95 Expect: 3e-06

| #  | b         | b <sup>++</sup> | b <sup>*</sup> | b <sup>+++</sup> | b <sup>0</sup> | b <sup>0++</sup> | Seq. | y         | y <sup>++</sup> | y <sup>*</sup> | y <sup>+++</sup> | y <sup>0</sup> | y <sup>0++</sup> | #  |
|----|-----------|-----------------|----------------|------------------|----------------|------------------|------|-----------|-----------------|----------------|------------------|----------------|------------------|----|
| 1  | 114.0550  | 57.5311         |                |                  |                |                  | A    |           |                 |                |                  |                |                  | 47 |
| 2  | 185.0921  | 93.0497         |                |                  |                |                  | A    | 4931.3348 | 2466.1710       | 4914.3083      | 2457.6578        | 4913.3242      | 2457.1658        | 46 |
| 3  | 242.1135  | 121.5604        |                |                  |                |                  | G    | 4860.2977 | 2430.6525       | 4843.2711      | 2422.1392        | 4842.2871      | 2421.6472        | 45 |
| 4  | 341.1819  | 171.0946        |                |                  |                |                  | V    | 4803.2762 | 2402.1418       | 4786.2497      | 2393.6285        | 4785.2657      | 2393.1365        | 44 |
| 5  | 470.2245  | 235.6159        |                |                  | 452.2140       | 226.6106         | E    | 4704.2078 | 2352.6075       | 4687.1813      | 2344.0943        | 4686.1972      | 2343.6023        | 43 |
| 6  | 541.2617  | 271.1345        |                |                  | 523.2511       | 262.1292         | A    | 4575.1652 | 2288.0862       | 4558.1387      | 2279.5730        | 4557.1547      | 2279.0810        | 42 |
| 7  | 612.2988  | 306.6530        |                |                  | 594.2882       | 297.6477         | A    | 4504.1281 | 2252.5677       | 4487.1016      | 2244.0544        | 4486.1175      | 2243.5624        | 41 |
| 8  | 683.3359  | 342.1716        |                |                  | 665.3253       | 333.1663         | A    | 4433.0910 | 2217.0491       | 4416.0644      | 2208.5359        | 4415.0804      | 2208.0439        | 40 |
| 9  | 812.3785  | 406.6929        |                |                  | 794.3679       | 397.6876         | E    | 4362.0539 | 2181.5306       | 4345.0273      | 2173.0173        | 4344.0433      | 2172.5253        | 39 |
| 10 | 911.4469  | 456.2271        |                |                  | 893.4363       | 447.2218         | V    | 4233.0113 | 2117.0093       | 4215.9847      | 2108.4960        | 4215.0007      | 2108.0040        | 38 |
| 11 | 982.4840  | 491.7456        |                |                  | 964.4734       | 482.7404         | A    | 4133.9429 | 2067.4751       | 4116.9163      | 2058.9618        | 4115.9323      | 2058.4698        | 37 |
| 12 | 1053.5211 | 527.2642        |                |                  | 1035.5106      | 518.2589         | A    | 4062.9058 | 2031.9565       | 4045.8792      | 2023.4432        | 4044.8952      | 2022.9512        | 36 |
| 13 | 1154.5688 | 577.7880        |                |                  | 1136.5582      | 568.7828         | T    | 3991.8686 | 1996.4380       | 3974.8421      | 1987.9247        | 3973.8581      | 1987.4327        | 35 |
| 14 | 1283.6114 | 642.3093        |                |                  | 1265.6008      | 633.3040         | E    | 3890.8210 | 1945.9141       | 3873.7944      | 1937.4008        | 3872.8104      | 1936.9088        | 34 |
| 15 | 1396.6955 | 698.8514        |                |                  | 1378.6849      | 689.8461         | I    | 3761.7784 | 1881.3928       | 3744.7518      | 1872.8795        | 3743.7678      | 1872.3875        | 33 |
| 16 | 1981.9825 | 991.4949        | 1964.9560      | 982.9816         | 1963.9720      | 982.4896         | K    | 3648.6943 | 1824.8508       | 3631.6678      | 1816.3375        | 3630.6837      | 1815.8455        | 32 |
| 17 | 2113.0230 | 1057.0151       | 2095.9965      | 1048.5019        | 2095.0124      | 1048.0099        | M    | 3063.4072 | 1532.2073       | 3046.3807      | 1523.6940        | 3045.3967      | 1523.2020        | 31 |
| 18 | 2242.0656 | 1121.5364       | 2225.0391      | 1113.0232        | 2224.0550      | 1112.5312        | E    | 2932.3667 | 1466.6870       | 2915.3402      | 1458.1737        | 2914.3562      | 1457.6817        | 30 |
| 19 | 2371.1082 | 1186.0577       | 2354.0816      | 1177.5445        | 2353.0976      | 1177.0525        | E    | 2803.3242 | 1402.1657       | 2786.2976      | 1393.6524        | 2785.3136      | 1393.1604        | 29 |
| 20 | 2500.1508 | 1250.5790       | 2483.1242      | 1242.0658        | 2482.1402      | 1241.5738        | E    | 2674.2816 | 1337.6444       | 2657.2550      | 1329.1311        | 2656.2710      | 1328.6391        | 28 |
| 21 | 2587.1828 | 1294.0950       | 2570.1563      | 1285.5818        | 2569.1723      | 1285.0898        | S    | 2545.2390 | 1273.1231       | 2528.2124      | 1264.6098        | 2527.2284      | 1264.1178        | 27 |
| 22 | 2644.2043 | 1322.6058       | 2627.1777      | 1314.0925        | 2626.1937      | 1313.6005        | G    | 2458.2069 | 1229.6071       | 2441.1804      | 1221.0938        | 2440.1964      | 1220.6018        | 26 |
| 23 | 2715.2414 | 1358.1243       | 2698.2148      | 1349.6111        | 2697.2308      | 1349.1191        | A    | 2401.1855 | 1201.0964       | 2384.1589      | 1192.5831        | 2383.1749      | 1192.0911        | 25 |
| 24 | 2812.2942 | 1406.6507       | 2795.2676      | 1398.1374        | 2794.2836      | 1397.6454        | P    | 2330.1484 | 1165.5778       | 2313.1218      | 1157.0645        | 2312.1378      | 1156.5725        | 24 |
| 25 | 2869.3156 | 1435.1615       | 2852.2891      | 1426.6482        | 2851.3051      | 1426.1562        | G    | 2233.0956 | 1117.0514       | 2216.0690      | 1108.5382        | 2215.0850      | 1108.0462        | 23 |
| 26 | 2968.3840 | 1484.6957       | 2951.3575      | 1476.1824        | 2950.3735      | 1475.6904        | V    | 2176.0741 | 1088.5407       | 2159.0476      | 1080.0274        | 2158.0636      | 1079.5354        | 22 |
| 27 | 3065.4368 | 1533.2220       | 3048.4103      | 1524.7088        | 3047.4262      | 1524.2168        | P    | 2077.0057 | 1039.0065       | 2059.9792      | 1030.4932        | 2058.9952      | 1030.0012        | 21 |
| 28 | 3152.4688 | 1576.7381       | 3135.4423      | 1568.2248        | 3134.4583      | 1567.7328        | S    | 1979.9530 | 990.4801        | 1962.9264      | 981.9668         | 1961.9424      | 981.4748         | 20 |
| 29 | 3209.4903 | 1605.2488       | 3192.4637      | 1596.7355        | 3191.4797      | 1596.2435        | G    | 1892.9209 | 946.9641        | 1875.8944      | 938.4508         | 1874.9104      | 937.9588         | 19 |

|    |           |           |           |           |           |           |   |           |          |           |          |           |          |    |
|----|-----------|-----------|-----------|-----------|-----------|-----------|---|-----------|----------|-----------|----------|-----------|----------|----|
| 30 | 3323.5332 | 1662.2702 | 3306.5067 | 1653.7570 | 3305.5227 | 1653.2650 | N | 1835.8995 | 918.4534 | 1818.8729 | 909.9401 | 1817.8889 | 909.4481 | 18 |
| 31 | 3380.5547 | 1690.7810 | 3363.5281 | 1682.2677 | 3362.5441 | 1681.7757 | G | 1721.8565 | 861.4319 | 1704.8300 | 852.9186 | 1703.8460 | 852.4266 | 17 |
| 32 | 3451.5918 | 1726.2995 | 3434.5653 | 1717.7863 | 3433.5812 | 1717.2943 | A | 1664.8351 | 832.9212 | 1647.8085 | 824.4079 | 1646.8245 | 823.9159 | 16 |
| 33 | 3548.6446 | 1774.8259 | 3531.6180 | 1766.3126 | 3530.6340 | 1765.8206 | P | 1593.7980 | 797.4026 | 1576.7714 | 788.8893 | 1575.7874 | 788.3973 | 15 |
| 34 | 3605.6660 | 1803.3367 | 3588.6395 | 1794.8234 | 3587.6555 | 1794.3314 | G | 1496.7452 | 748.8762 | 1479.7186 | 740.3630 | 1478.7346 | 739.8710 | 14 |
| 35 | 3702.7188 | 1851.8630 | 3685.6922 | 1843.3498 | 3684.7082 | 1842.8578 | P | 1439.7237 | 720.3655 | 1422.6972 | 711.8522 | 1421.7132 | 711.3602 | 13 |
| 36 | 3830.8138 | 1915.9105 | 3813.7872 | 1907.3972 | 3812.8032 | 1906.9052 | K | 1342.6710 | 671.8391 | 1325.6444 | 663.3258 | 1324.6604 | 662.8338 | 12 |
| 37 | 3887.8352 | 1944.4212 | 3870.8087 | 1935.9080 | 3869.8247 | 1935.4160 | G | 1214.5760 | 607.7916 | 1197.5495 | 599.2784 | 1196.5654 | 598.7864 | 11 |
| 38 | 4016.8778 | 2008.9425 | 3999.8513 | 2000.4293 | 3998.8672 | 1999.9373 | E | 1157.5545 | 579.2809 | 1140.5280 | 570.7676 | 1139.5440 | 570.2756 | 10 |
| 39 | 4073.8993 | 2037.4533 | 4056.8727 | 2028.9400 | 4055.8887 | 2028.4480 | G | 1028.5119 | 514.7596 | 1011.4854 | 506.2463 | 1010.5014 | 505.7543 | 9  |
| 40 | 4202.9419 | 2101.9746 | 4185.9153 | 2093.4613 | 4184.9313 | 2092.9693 | E | 971.4905  | 486.2489 | 954.4639  | 477.7356 | 953.4799  | 477.2436 | 8  |
| 41 | 4359.0430 | 2180.0251 | 4342.0164 | 2171.5119 | 4341.0324 | 2171.0198 | R | 842.4479  | 421.7276 | 825.4213  | 413.2143 | 824.4373  | 412.7223 | 7  |
| 42 | 4456.0957 | 2228.5515 | 4439.0692 | 2220.0382 | 4438.0852 | 2219.5462 | P | 686.3468  | 343.6770 | 669.3202  | 335.1638 | 668.3362  | 334.6717 | 6  |
| 43 | 4527.1329 | 2264.0701 | 4510.1063 | 2255.5568 | 4509.1223 | 2255.0648 | A | 589.2940  | 295.1506 | 572.2675  | 286.6374 | 571.2835  | 286.1454 | 5  |
| 44 | 4655.1914 | 2328.0994 | 4638.1649 | 2319.5861 | 4637.1809 | 2319.0941 | Q | 518.2569  | 259.6321 | 501.2304  | 251.1188 | 500.2463  | 250.6268 | 4  |
| 45 | 4769.2344 | 2385.1208 | 4752.2078 | 2376.6075 | 4751.2238 | 2376.1155 | N | 390.1983  | 195.6028 | 373.1718  | 187.0895 | 372.1878  | 186.5975 | 3  |
| 46 | 4898.2770 | 2449.6421 | 4881.2504 | 2441.1288 | 4880.2664 | 2440.6368 | E | 276.1554  | 138.5813 | 259.1288  | 130.0681 | 258.1448  | 129.5761 | 2  |
| 47 |           |           |           |           |           |           | K | 147.1128  | 74.0600  | 130.0863  | 65.5468  |           |          | 1  |

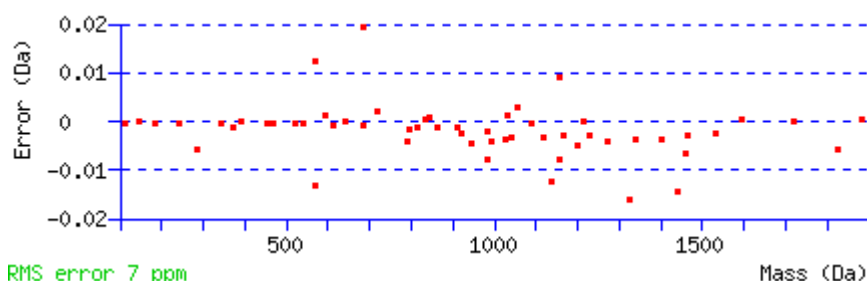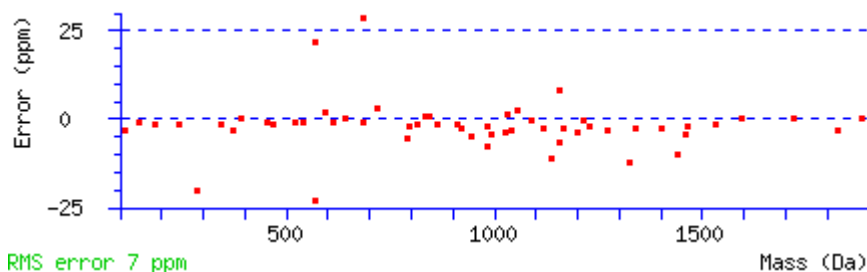

IDENTIFICATION 56

MS/MS Fragmentation of **AAGVEAAAEVAATEIKMEEESGAPGVPSGNGAPGPKGEGERPAQNEK**

Found in **P52272**, Heterogeneous nuclear ribonucleoprotein M OS=Homo sapiens GN=HNRNPM PE=1 SV=3

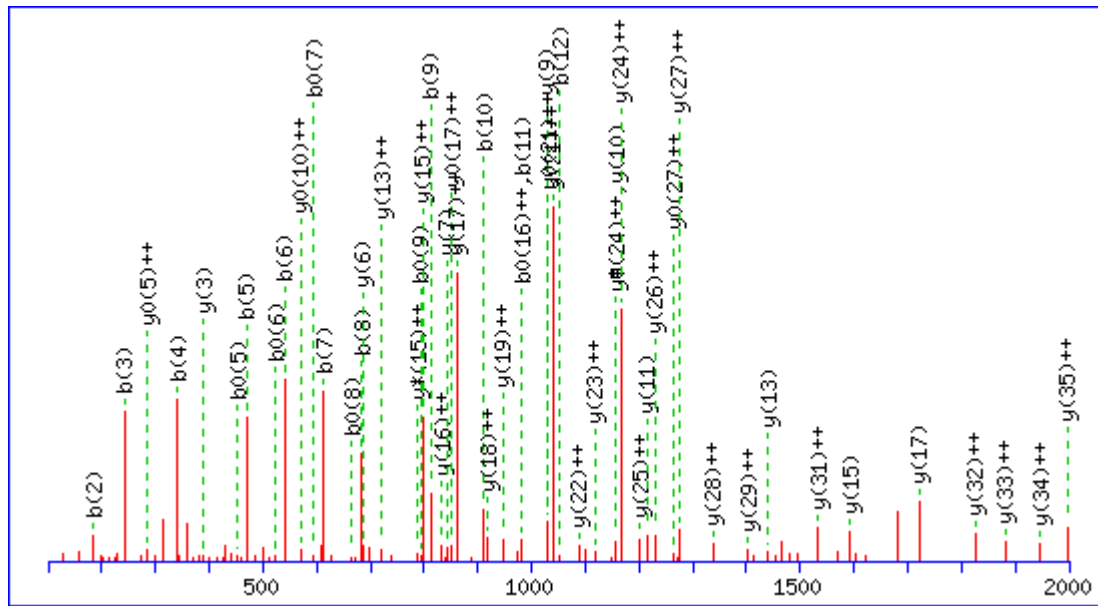

Monoisotopic mass of neutral peptide  $M_r(\text{calc})$ : 5044.3591

Variable modifications:

N-term : Acetyl (N-term)

K16 : Sumo 3 (K)

N30 : Deamidated (NQ)

Ions Score: 130 Expect: 9.7e-10

| #  | b         | b <sup>++</sup> | b <sup>*</sup> | b <sup>+++</sup> | b <sup>0</sup> | b <sup>0++</sup> | Seq. | y         | y <sup>++</sup> | y <sup>*</sup> | y <sup>+++</sup> | y <sup>0</sup> | y <sup>0++</sup> | #  |
|----|-----------|-----------------|----------------|------------------|----------------|------------------|------|-----------|-----------------|----------------|------------------|----------------|------------------|----|
| 1  | 114.0550  | 57.5311         |                |                  |                |                  | A    |           |                 |                |                  |                |                  | 47 |
| 2  | 185.0921  | 93.0497         |                |                  |                |                  | A    | 4932.3188 | 2466.6630       | 4915.2923      | 2458.1498        | 4914.3083      | 2457.6578        | 46 |
| 3  | 242.1135  | 121.5604        |                |                  |                |                  | G    | 4861.2817 | 2431.1445       | 4844.2552      | 2422.6312        | 4843.2711      | 2422.1392        | 45 |
| 4  | 341.1819  | 171.0946        |                |                  |                |                  | V    | 4804.2602 | 2402.6338       | 4787.2337      | 2394.1205        | 4786.2497      | 2393.6285        | 44 |
| 5  | 470.2245  | 235.6159        |                |                  | 452.2140       | 226.6106         | E    | 4705.1918 | 2353.0996       | 4688.1653      | 2344.5863        | 4687.1813      | 2344.0943        | 43 |
| 6  | 541.2617  | 271.1345        |                |                  | 523.2511       | 262.1292         | A    | 4576.1492 | 2288.5783       | 4559.1227      | 2280.0650        | 4558.1387      | 2279.5730        | 42 |
| 7  | 612.2988  | 306.6530        |                |                  | 594.2882       | 297.6477         | A    | 4505.1121 | 2253.0597       | 4488.0856      | 2244.5464        | 4487.1016      | 2244.0544        | 41 |
| 8  | 683.3359  | 342.1716        |                |                  | 665.3253       | 333.1663         | A    | 4434.0750 | 2217.5411       | 4417.0485      | 2209.0279        | 4416.0644      | 2208.5359        | 40 |
| 9  | 812.3785  | 406.6929        |                |                  | 794.3679       | 397.6876         | E    | 4363.0379 | 2182.0226       | 4346.0113      | 2173.5093        | 4345.0273      | 2173.0173        | 39 |
| 10 | 911.4469  | 456.2271        |                |                  | 893.4363       | 447.2218         | V    | 4233.9953 | 2117.5013       | 4216.9688      | 2108.9880        | 4215.9847      | 2108.4960        | 38 |
| 11 | 982.4840  | 491.7456        |                |                  | 964.4734       | 482.7404         | A    | 4134.9269 | 2067.9671       | 4117.9003      | 2059.4538        | 4116.9163      | 2058.9618        | 37 |
| 12 | 1053.5211 | 527.2642        |                |                  | 1035.5106      | 518.2589         | A    | 4063.8898 | 2032.4485       | 4046.8632      | 2023.9352        | 4045.8792      | 2023.4432        | 36 |
| 13 | 1154.5688 | 577.7880        |                |                  | 1136.5582      | 568.7828         | T    | 3992.8527 | 1996.9300       | 3975.8261      | 1988.4167        | 3974.8421      | 1987.9247        | 35 |
| 14 | 1283.6114 | 642.3093        |                |                  | 1265.6008      | 633.3040         | E    | 3891.8050 | 1946.4061       | 3874.7784      | 1937.8929        | 3873.7944      | 1937.4008        | 34 |
| 15 | 1396.6955 | 698.8514        |                |                  | 1378.6849      | 689.8461         | I    | 3762.7624 | 1881.8848       | 3745.7358      | 1873.3716        | 3744.7518      | 1872.8795        | 33 |
| 16 | 1981.9825 | 991.4949        | 1964.9560      | 982.9816         | 1963.9720      | 982.4896         | K    | 3649.6783 | 1825.3428       | 3632.6518      | 1816.8295        | 3631.6678      | 1816.3375        | 32 |
| 17 | 2113.0230 | 1057.0151       | 2095.9965      | 1048.5019        | 2095.0124      | 1048.0099        | M    | 3064.3912 | 1532.6993       | 3047.3647      | 1524.1860        | 3046.3807      | 1523.6940        | 31 |
| 18 | 2242.0656 | 1121.5364       | 2225.0391      | 1113.0232        | 2224.0550      | 1112.5312        | E    | 2933.3508 | 1467.1790       | 2916.3242      | 1458.6657        | 2915.3402      | 1458.1737        | 30 |
| 19 | 2371.1082 | 1186.0577       | 2354.0816      | 1177.5445        | 2353.0976      | 1177.0525        | E    | 2804.3082 | 1402.6577       | 2787.2816      | 1394.1444        | 2786.2976      | 1393.6524        | 29 |
| 20 | 2500.1508 | 1250.5790       | 2483.1242      | 1242.0658        | 2482.1402      | 1241.5738        | E    | 2675.2656 | 1338.1364       | 2658.2390      | 1329.6232        | 2657.2550      | 1329.1311        | 28 |
| 21 | 2587.1828 | 1294.0950       | 2570.1563      | 1285.5818        | 2569.1723      | 1285.0898        | S    | 2546.2230 | 1273.6151       | 2529.1964      | 1265.1019        | 2528.2124      | 1264.6098        | 27 |
| 22 | 2644.2043 | 1322.6058       | 2627.1777      | 1314.0925        | 2626.1937      | 1313.6005        | G    | 2459.1910 | 1230.0991       | 2442.1644      | 1221.5858        | 2441.1804      | 1221.0938        | 26 |
| 23 | 2715.2414 | 1358.1243       | 2698.2148      | 1349.6111        | 2697.2308      | 1349.1191        | A    | 2402.1695 | 1201.5884       | 2385.1429      | 1193.0751        | 2384.1589      | 1192.5831        | 25 |
| 24 | 2812.2942 | 1406.6507       | 2795.2676      | 1398.1374        | 2794.2836      | 1397.6454        | P    | 2331.1324 | 1166.0698       | 2314.1058      | 1157.5566        | 2313.1218      | 1157.0645        | 24 |
| 25 | 2869.3156 | 1435.1615       | 2852.2891      | 1426.6482        | 2851.3051      | 1426.1562        | G    | 2234.0796 | 1117.5434       | 2217.0531      | 1109.0302        | 2216.0690      | 1108.5382        | 23 |

|    |           |           |           |           |           |           |   |           |           |           |           |           |           |    |
|----|-----------|-----------|-----------|-----------|-----------|-----------|---|-----------|-----------|-----------|-----------|-----------|-----------|----|
| 26 | 2968.3840 | 1484.6957 | 2951.3575 | 1476.1824 | 2950.3735 | 1475.6904 | V | 2177.0582 | 1089.0327 | 2160.0316 | 1080.5194 | 2159.0476 | 1080.0274 | 22 |
| 27 | 3065.4368 | 1533.2220 | 3048.4103 | 1524.7088 | 3047.4262 | 1524.2168 | P | 2077.9897 | 1039.4985 | 2060.9632 | 1030.9852 | 2059.9792 | 1030.4932 | 21 |
| 28 | 3152.4688 | 1576.7381 | 3135.4423 | 1568.2248 | 3134.4583 | 1567.7328 | S | 1980.9370 | 990.9721  | 1963.9104 | 982.4589  | 1962.9264 | 981.9668  | 20 |
| 29 | 3209.4903 | 1605.2488 | 3192.4637 | 1596.7355 | 3191.4797 | 1596.2435 | G | 1893.9049 | 947.4561  | 1876.8784 | 938.9428  | 1875.8944 | 938.4508  | 19 |
| 30 | 3324.5172 | 1662.7623 | 3307.4907 | 1654.2490 | 3306.5067 | 1653.7570 | N | 1836.8835 | 918.9454  | 1819.8569 | 910.4321  | 1818.8729 | 909.9401  | 18 |
| 31 | 3381.5387 | 1691.2730 | 3364.5122 | 1682.7597 | 3363.5281 | 1682.2677 | G | 1721.8565 | 861.4319  | 1704.8300 | 852.9186  | 1703.8460 | 852.4266  | 17 |
| 32 | 3452.5758 | 1726.7915 | 3435.5493 | 1718.2783 | 3434.5653 | 1717.7863 | A | 1664.8351 | 832.9212  | 1647.8085 | 824.4079  | 1646.8245 | 823.9159  | 16 |
| 33 | 3549.6286 | 1775.3179 | 3532.6020 | 1766.8047 | 3531.6180 | 1766.3126 | P | 1593.7980 | 797.4026  | 1576.7714 | 788.8893  | 1575.7874 | 788.3973  | 15 |
| 34 | 3606.6500 | 1803.8287 | 3589.6235 | 1795.3154 | 3588.6395 | 1794.8234 | G | 1496.7452 | 748.8762  | 1479.7186 | 740.3630  | 1478.7346 | 739.8710  | 14 |
| 35 | 3703.7028 | 1852.3550 | 3686.6763 | 1843.8418 | 3685.6922 | 1843.3498 | P | 1439.7237 | 720.3655  | 1422.6972 | 711.8522  | 1421.7132 | 711.3602  | 13 |
| 36 | 3831.7978 | 1916.4025 | 3814.7712 | 1907.8892 | 3813.7872 | 1907.3972 | K | 1342.6710 | 671.8391  | 1325.6444 | 663.3258  | 1324.6604 | 662.8338  | 12 |
| 37 | 3888.8192 | 1944.9133 | 3871.7927 | 1936.4000 | 3870.8087 | 1935.9080 | G | 1214.5760 | 607.7916  | 1197.5495 | 599.2784  | 1196.5654 | 598.7864  | 11 |
| 38 | 4017.8618 | 2009.4346 | 4000.8353 | 2000.9213 | 3999.8513 | 2000.4293 | E | 1157.5545 | 579.2809  | 1140.5280 | 570.7676  | 1139.5440 | 570.2756  | 10 |
| 39 | 4074.8833 | 2037.9453 | 4057.8567 | 2029.4320 | 4056.8727 | 2028.9400 | G | 1028.5119 | 514.7596  | 1011.4854 | 506.2463  | 1010.5014 | 505.7543  | 9  |
| 40 | 4203.9259 | 2102.4666 | 4186.8993 | 2093.9533 | 4185.9153 | 2093.4613 | E | 971.4905  | 486.2489  | 954.4639  | 477.7356  | 953.4799  | 477.2436  | 8  |
| 41 | 4360.0270 | 2180.5171 | 4343.0004 | 2172.0039 | 4342.0164 | 2171.5119 | R | 842.4479  | 421.7276  | 825.4213  | 413.2143  | 824.4373  | 412.7223  | 7  |
| 42 | 4457.0798 | 2229.0435 | 4440.0532 | 2220.5302 | 4439.0692 | 2220.0382 | P | 686.3468  | 343.6770  | 669.3202  | 335.1638  | 668.3362  | 334.6717  | 6  |
| 43 | 4528.1169 | 2264.5621 | 4511.0903 | 2256.0488 | 4510.1063 | 2255.5568 | A | 589.2940  | 295.1506  | 572.2675  | 286.6374  | 571.2835  | 286.1454  | 5  |
| 44 | 4656.1755 | 2328.5914 | 4639.1489 | 2320.0781 | 4638.1649 | 2319.5861 | Q | 518.2569  | 259.6321  | 501.2304  | 251.1188  | 500.2463  | 250.6268  | 4  |
| 45 | 4770.2184 | 2385.6128 | 4753.1918 | 2377.0996 | 4752.2078 | 2376.6075 | N | 390.1983  | 195.6028  | 373.1718  | 187.0895  | 372.1878  | 186.5975  | 3  |
| 46 | 4899.2610 | 2450.1341 | 4882.2344 | 2441.6208 | 4881.2504 | 2441.1288 | E | 276.1554  | 138.5813  | 259.1288  | 130.0681  | 258.1448  | 129.5761  | 2  |
| 47 |           |           |           |           |           |           | K | 147.1128  | 74.0600   | 130.0863  | 65.5468   |           |           | 1  |

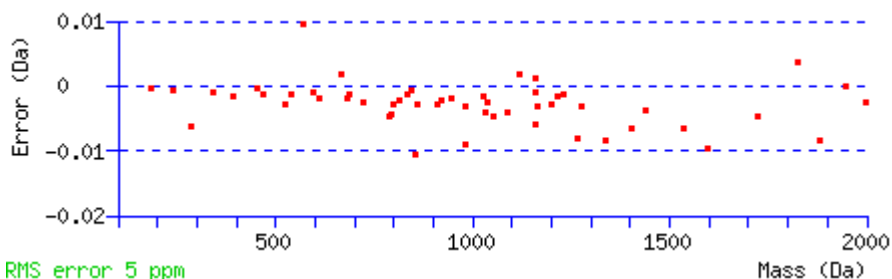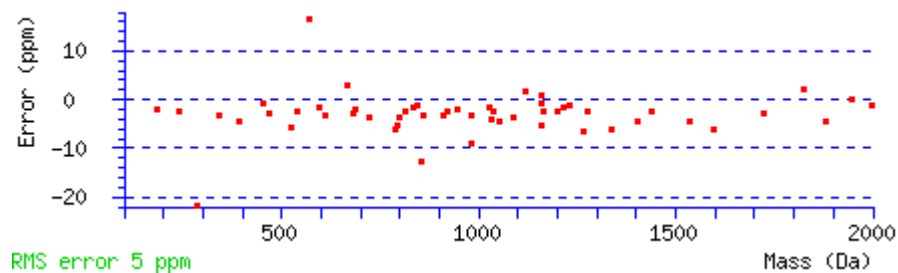

IDENTIFICATION 57

MS/MS Fragmentation of **ADEKPKEGVKTENNDHILNK**

Found in **P61956**, Small ubiquitin-related modifier 2 OS=Homo sapiens GN=SUMO2 PE=1 SV=3

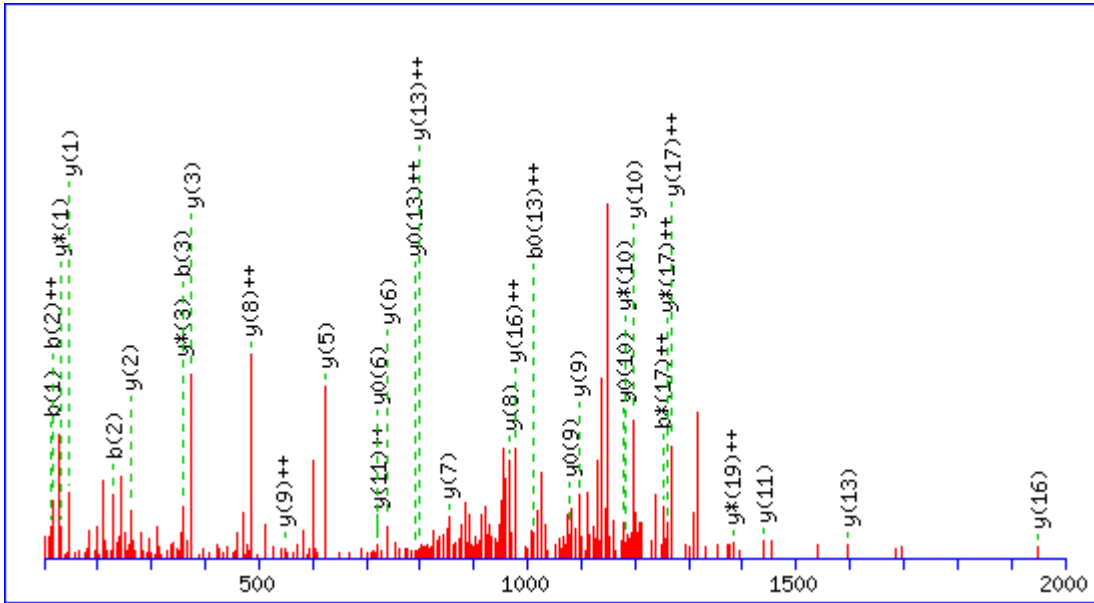

Monoisotopic mass of neutral peptide  $M_r(\text{calc})$ : 2891.4009

Variable modifications:

N-term : Acetyl (N-term)

K4 : Sumo 3 (K)

K10 : GlyGly (K)

Ions Score: 37 Expect: 0.66

| #  | b         | b <sup>++</sup> | b <sup>*</sup> | b <sup>+++</sup> | b <sup>0</sup> | b <sup>0++</sup> | Seq. | y         | y <sup>++</sup> | y <sup>*</sup> | y <sup>+++</sup> | y <sup>0</sup> | y <sup>0++</sup> | #  |
|----|-----------|-----------------|----------------|------------------|----------------|------------------|------|-----------|-----------------|----------------|------------------|----------------|------------------|----|
| 1  | 114.0550  | 57.5311         |                |                  |                |                  | A    |           |                 |                |                  |                |                  | 20 |
| 2  | 229.0819  | 115.0446        |                |                  | 211.0713       | 106.0393         | D    | 2779.3605 | 1390.1839       | 2762.3340      | 1381.6706        | 2761.3500      | 1381.1786        | 19 |
| 3  | 358.1245  | 179.5659        |                |                  | 340.1139       | 170.5606         | E    | 2664.3336 | 1332.6704       | 2647.3070      | 1324.1572        | 2646.3230      | 1323.6652        | 18 |
| 4  | 943.4116  | 472.2094        | 926.3850       | 463.6961         | 925.4010       | 463.2041         | K    | 2535.2910 | 1268.1491       | 2518.2645      | 1259.6359        | 2517.2804      | 1259.1439        | 17 |
| 5  | 1040.4643 | 520.7358        | 1023.4378      | 512.2225         | 1022.4538      | 511.7305         | P    | 1950.0039 | 975.5056        | 1932.9774      | 966.9923         | 1931.9934      | 966.5003         | 16 |
| 6  | 1168.5593 | 584.7833        | 1151.5327      | 576.2700         | 1150.5487      | 575.7780         | K    | 1852.9512 | 926.9792        | 1835.9246      | 918.4659         | 1834.9406      | 917.9739         | 15 |
| 7  | 1297.6019 | 649.3046        | 1280.5753      | 640.7913         | 1279.5913      | 640.2993         | E    | 1724.8562 | 862.9317        | 1707.8297      | 854.4185         | 1706.8456      | 853.9265         | 14 |
| 8  | 1354.6233 | 677.8153        | 1337.5968      | 669.3020         | 1336.6128      | 668.8100         | G    | 1595.8136 | 798.4104        | 1578.7871      | 789.8972         | 1577.8030      | 789.4052         | 13 |
| 9  | 1453.6918 | 727.3495        | 1436.6652      | 718.8362         | 1435.6812      | 718.3442         | V    | 1538.7921 | 769.8997        | 1521.7656      | 761.3864         | 1520.7816      | 760.8944         | 12 |
| 10 | 1695.8297 | 848.4185        | 1678.8031      | 839.9052         | 1677.8191      | 839.4132         | K    | 1439.7237 | 720.3655        | 1422.6972      | 711.8522         | 1421.7132      | 711.3602         | 11 |
| 11 | 1796.8773 | 898.9423        | 1779.8508      | 890.4290         | 1778.8668      | 889.9370         | T    | 1197.5858 | 599.2966        | 1180.5593      | 590.7833         | 1179.5753      | 590.2913         | 10 |
| 12 | 1925.9199 | 963.4636        | 1908.8934      | 954.9503         | 1907.9094      | 954.4583         | E    | 1096.5382 | 548.7727        | 1079.5116      | 540.2594         | 1078.5276      | 539.7674         | 9  |
| 13 | 2039.9629 | 1020.4851       | 2022.9363      | 1011.9718        | 2021.9523      | 1011.4798        | N    | 967.4956  | 484.2514        | 950.4690       | 475.7381         | 949.4850       | 475.2461         | 8  |
| 14 | 2154.0058 | 1077.5065       | 2136.9792      | 1068.9933        | 2135.9952      | 1068.5012        | N    | 853.4526  | 427.2300        | 836.4261       | 418.7167         | 835.4421       | 418.2247         | 7  |
| 15 | 2269.0327 | 1135.0200       | 2252.0062      | 1126.5067        | 2251.0222      | 1126.0147        | D    | 739.4097  | 370.2085        | 722.3832       | 361.6952         | 721.3991       | 361.2032         | 6  |
| 16 | 2406.0916 | 1203.5495       | 2389.0651      | 1195.0362        | 2388.0811      | 1194.5442        | H    | 624.3828  | 312.6950        | 607.3562       | 304.1817         |                |                  | 5  |
| 17 | 2519.1757 | 1260.0915       | 2502.1491      | 1251.5782        | 2501.1651      | 1251.0862        | I    | 487.3239  | 244.1656        | 470.2973       | 235.6523         |                |                  | 4  |
| 18 | 2633.2186 | 1317.1130       | 2616.1921      | 1308.5997        | 2615.2081      | 1308.1077        | N    | 374.2398  | 187.6235        | 357.2132       | 179.1103         |                |                  | 3  |
| 19 | 2746.3027 | 1373.6550       | 2729.2761      | 1365.1417        | 2728.2921      | 1364.6497        | L    | 260.1969  | 130.6021        | 243.1703       | 122.0888         |                |                  | 2  |
| 20 |           |                 |                |                  |                |                  | K    | 147.1128  | 74.0600         | 130.0863       | 65.5468          |                |                  | 1  |

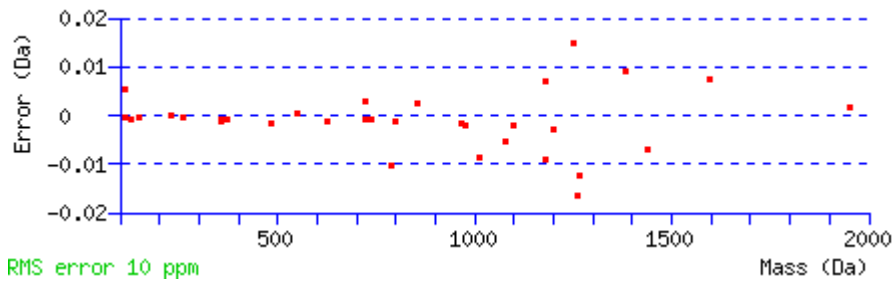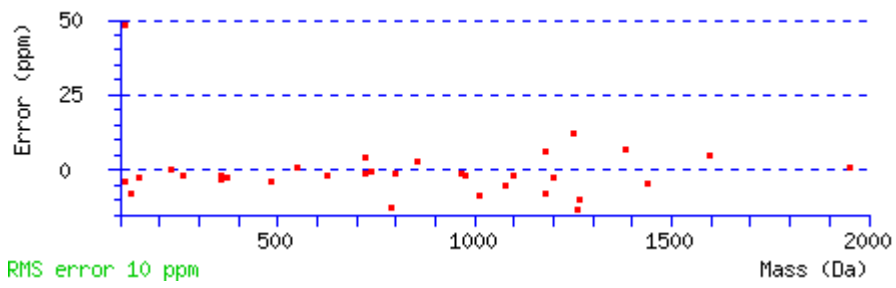



MS/MS Fragmentation of **ASTSKSESSQK**

Found in **P62753**, 40S ribosomal protein S6 OS=Homo sapiens GN=RPS6 PE=1 SV=1

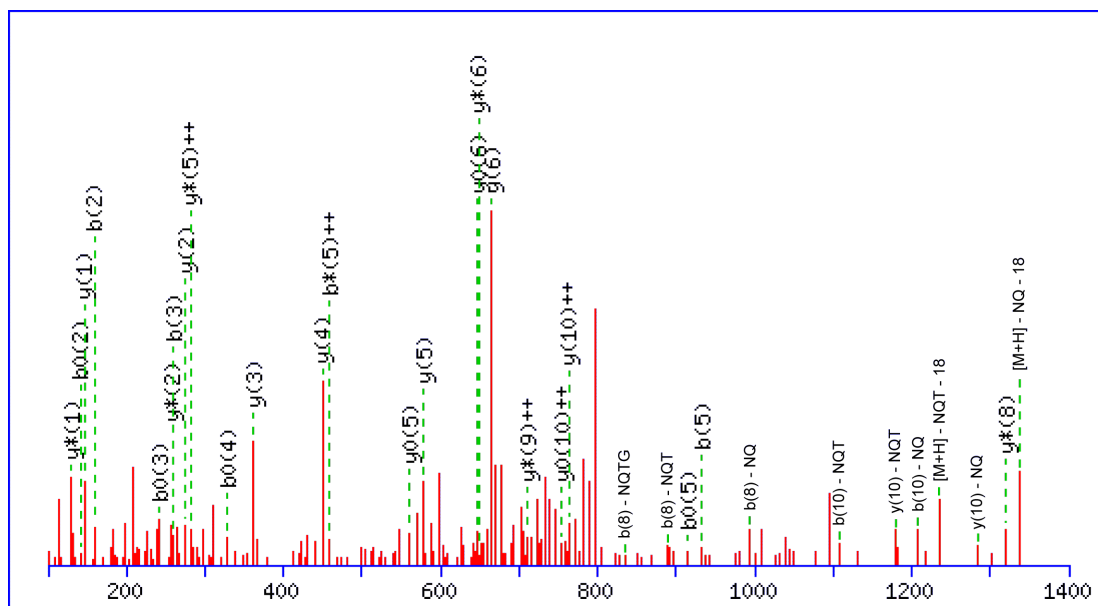

Monoisotopic mass of neutral peptide  $M_r(\text{calc})$ : 1595.7387

Variable modifications:

K5 : Sumo 3 (K)

Ions Score: 14 Expect: 54

| #  | b               | b <sup>++</sup> | b <sup>*</sup> | b <sup>+++</sup> | b <sup>0</sup>  | b <sup>0++</sup> | Seq. | y               | y <sup>++</sup> | y <sup>*</sup>   | y <sup>+++</sup> | y <sup>0</sup>  | y <sup>0++</sup> | #  |
|----|-----------------|-----------------|----------------|------------------|-----------------|------------------|------|-----------------|-----------------|------------------|------------------|-----------------|------------------|----|
| 1  | 72.0444         | 36.5258         |                |                  |                 |                  | A    |                 |                 |                  |                  |                 |                  | 11 |
| 2  | <b>159.0764</b> | 80.0418         |                |                  | <b>141.0659</b> | 71.0366          | S    | 1525.7089       | <b>763.3581</b> | 1508.6823        | 754.8448         | 1507.6983       | <b>754.3528</b>  | 10 |
| 3  | <b>260.1241</b> | 130.5657        |                |                  | <b>242.1135</b> | 121.5604         | T    | 1438.6768       | 719.8421        | 1421.6503        | <b>711.3288</b>  | 1420.6663       | 710.8368         | 9  |
| 4  | <b>347.1561</b> | <b>174.0817</b> |                |                  | <b>329.1456</b> | <b>165.0764</b>  | S    | 1337.6292       | <b>669.3182</b> | <b>1320.6026</b> | <b>660.8049</b>  | 1319.6186       | <b>660.3129</b>  | 8  |
| 5  | <b>932.4432</b> | 466.7252        | 915.4167       | <b>458.2120</b>  | <b>914.4326</b> | 457.7200         | K    | 1250.5971       | 625.8022        | 1233.5706        | 617.2889         | 1232.5866       | 616.7969         | 7  |
| 6  | 1019.4752       | 510.2413        | 1002.4487      | 501.7280         | 1001.4647       | 501.2360         | S    | <b>665.3101</b> | 333.1587        | <b>648.2835</b>  | 324.6454         | <b>647.2995</b> | 324.1534         | 6  |
| 7  | 1148.5178       | 574.7625        | 1131.4913      | 566.2493         | 1130.5073       | 565.7573         | E    | <b>578.2780</b> | 289.6427        | 561.2515         | <b>281.1294</b>  | <b>560.2675</b> | 280.6374         | 5  |
| 8  | 1235.5498       | 618.2786        | 1218.5233      | 609.7653         | 1217.5393       | 609.2733         | S    | <b>449.2354</b> | 225.1214        | 432.2089         | 216.6081         | 431.2249        | 216.1161         | 4  |
| 9  | 1322.5819       | 661.7946        | 1305.5553      | 653.2813         | 1304.5713       | 652.7893         | S    | <b>362.2034</b> | 181.6053        | 345.1769         | 173.0921         | 344.1928        | 172.6001         | 3  |
| 10 | 1450.6405       | 725.8239        | 1433.6139      | 717.3106         | 1432.6299       | 716.8186         | Q    | <b>275.1714</b> | 138.0893        | <b>258.1448</b>  | 129.5761         |                 |                  | 2  |
| 11 |                 |                 |                |                  |                 |                  | K    | <b>147.1128</b> | 74.0600         | <b>130.0863</b>  | 65.5468          |                 |                  | 1  |

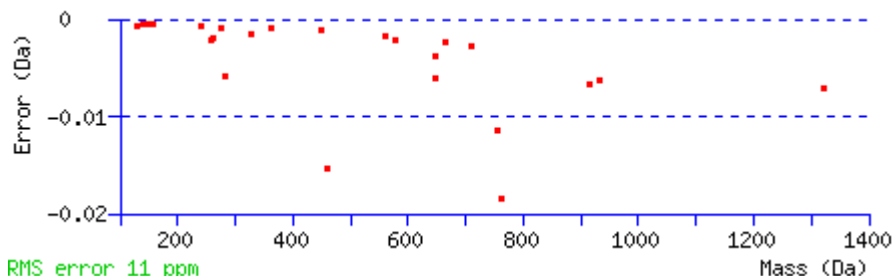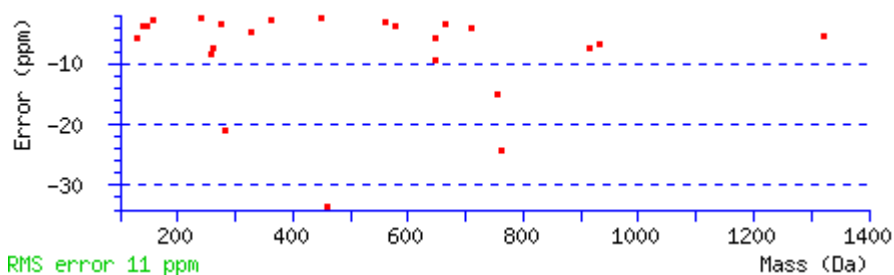



IDENTIFICATION 59

MS/MS Fragmentation of **ATGDETGAKVER**

Found in **P61247**, 40S ribosomal protein S3a OS=Homo sapiens GN=RPS3A PE=1 SV=2

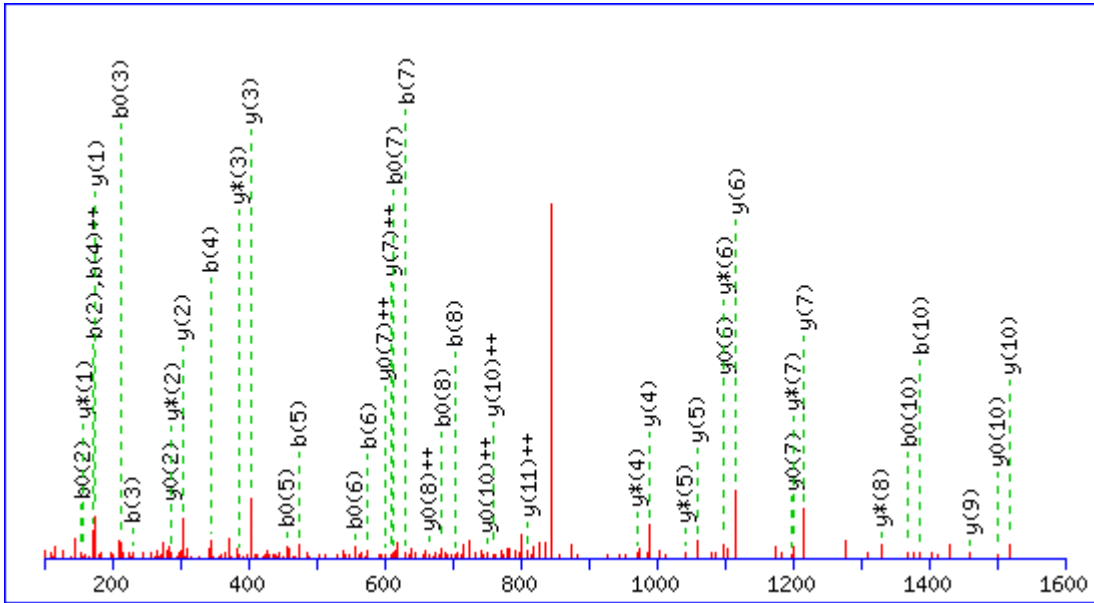

Monoisotopic mass of neutral peptide  $M_r(\text{calc})$ : 1689.7918

Variable modifications:

K9 : Sumo 3 (K)

Ions Score: 53 Expect: 0.0086

| #  | b         | b <sup>++</sup> | b <sup>*</sup> | b <sup>+++</sup> | b <sup>0</sup> | b <sup>0++</sup> | Seq. | y         | y <sup>++</sup> | y <sup>*</sup> | y <sup>+++</sup> | y <sup>0</sup> | y <sup>0++</sup> | #  |
|----|-----------|-----------------|----------------|------------------|----------------|------------------|------|-----------|-----------------|----------------|------------------|----------------|------------------|----|
| 1  | 72.0444   | 36.5258         |                |                  |                |                  | A    |           |                 |                |                  |                |                  | 12 |
| 2  | 173.0921  | 87.0497         |                |                  | 155.0815       | 78.0444          | T    | 1619.7620 | 810.3846        | 1602.7354      | 801.8713         | 1601.7514      | 801.3793         | 11 |
| 3  | 230.1135  | 115.5604        |                |                  | 212.1030       | 106.5551         | G    | 1518.7143 | 759.8608        | 1501.6877      | 751.3475         | 1500.7037      | 750.8555         | 10 |
| 4  | 345.1405  | 173.0739        |                |                  | 327.1299       | 164.0686         | D    | 1461.6928 | 731.3501        | 1444.6663      | 722.8368         | 1443.6823      | 722.3448         | 9  |
| 5  | 474.1831  | 237.5952        |                |                  | 456.1725       | 228.5899         | E    | 1346.6659 | 673.8366        | 1329.6393      | 665.3233         | 1328.6553      | 664.8313         | 8  |
| 6  | 575.2307  | 288.1190        |                |                  | 557.2202       | 279.1137         | T    | 1217.6233 | 609.3153        | 1200.5967      | 600.8020         | 1199.6127      | 600.3100         | 7  |
| 7  | 632.2522  | 316.6297        |                |                  | 614.2416       | 307.6245         | G    | 1116.5756 | 558.7914        | 1099.5491      | 550.2782         | 1098.5650      | 549.7862         | 6  |
| 8  | 703.2893  | 352.1483        |                |                  | 685.2788       | 343.1430         | A    | 1059.5541 | 530.2807        | 1042.5276      | 521.7674         | 1041.5436      | 521.2754         | 5  |
| 9  | 1288.5764 | 644.7918        | 1271.5499      | 636.2786         | 1270.5658      | 635.7866         | K    | 988.5170  | 494.7622        | 971.4905       | 486.2489         | 970.5065       | 485.7569         | 4  |
| 10 | 1387.6448 | 694.3260        | 1370.6183      | 685.8128         | 1369.6342      | 685.3208         | V    | 403.2300  | 202.1186        | 386.2034       | 193.6053         | 385.2194       | 193.1133         | 3  |
| 11 | 1516.6874 | 758.8473        | 1499.6609      | 750.3341         | 1498.6768      | 749.8421         | E    | 304.1615  | 152.5844        | 287.1350       | 144.0711         | 286.1510       | 143.5791         | 2  |
| 12 |           |                 |                |                  |                |                  | R    | 175.1190  | 88.0631         | 158.0924       | 79.5498          |                |                  | 1  |

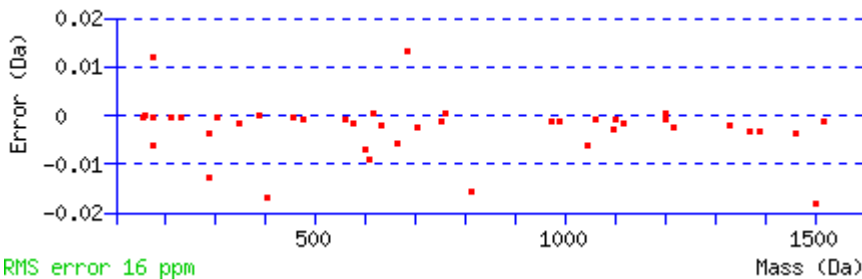

RMS error 16 ppm

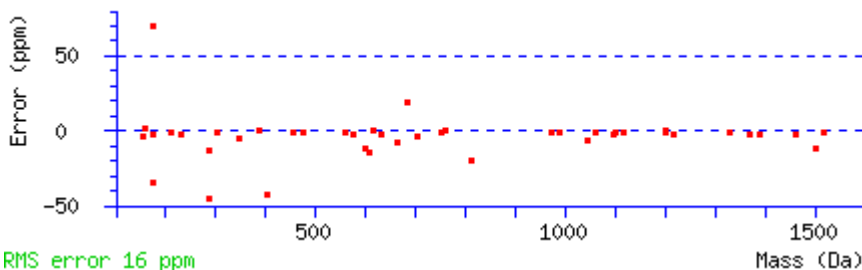

RMS error 16 ppm



IDENTIFICATION 60

MS/MS Fragmentation of **EGVKTENNDHILK**

Found in **P61956**, Small ubiquitin-related modifier 2 OS=Homo sapiens GN=SUMO2 PE=1 SV=3

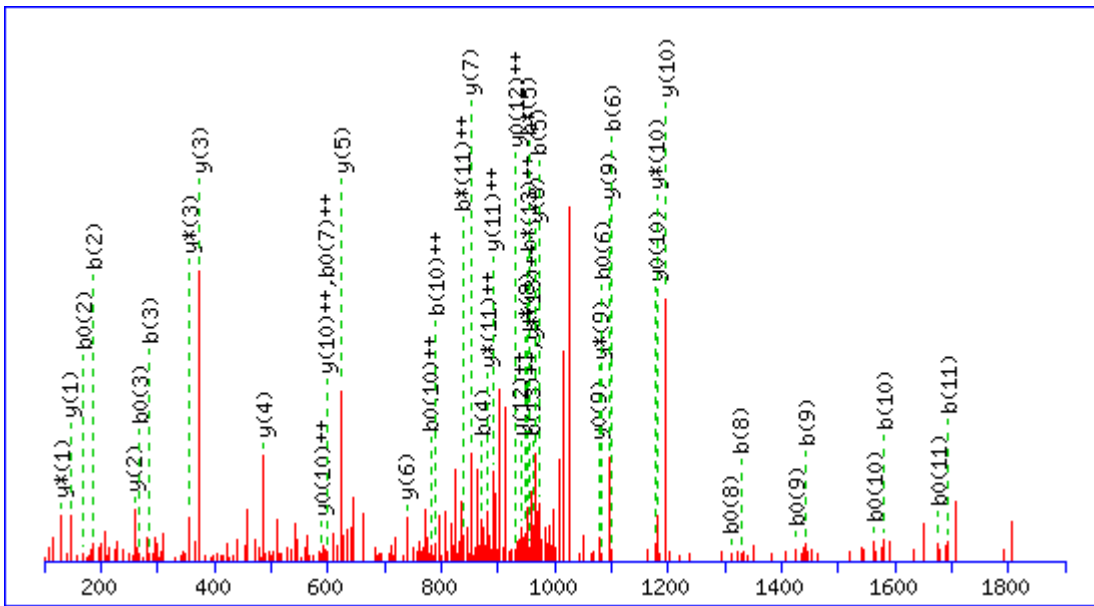

Monoisotopic mass of neutral peptide  $M_r(\text{calc})$ : 2066.9981

Variable modifications:

K4 : Sumo 3 (K)

Ions Score: 34 Expect: 0.89

| #  | b         | b <sup>++</sup> | b <sup>*</sup> | b <sup>+++</sup> | b <sup>0</sup> | b <sup>0++</sup> | Seq. | y         | y <sup>++</sup> | y <sup>*</sup> | y <sup>+++</sup> | y <sup>0</sup> | y <sup>0++</sup> | #  |
|----|-----------|-----------------|----------------|------------------|----------------|------------------|------|-----------|-----------------|----------------|------------------|----------------|------------------|----|
| 1  | 130.0499  | 65.5286         |                |                  | 112.0393       | 56.5233          | E    |           |                 |                |                  |                |                  | 14 |
| 2  | 187.0713  | 94.0393         |                |                  | 169.0608       | 85.0340          | G    | 1938.9628 | 969.9850        | 1921.9362      | 961.4718         | 1920.9522      | 960.9798         | 13 |
| 3  | 286.1397  | 143.5735        |                |                  | 268.1292       | 134.5682         | V    | 1881.9413 | 941.4743        | 1864.9148      | 932.9610         | 1863.9308      | 932.4690         | 12 |
| 4  | 871.4268  | 436.2170        | 854.4003       | 427.7038         | 853.4163       | 427.2118         | K    | 1782.8729 | 891.9401        | 1765.8464      | 883.4268         | 1764.8623      | 882.9348         | 11 |
| 5  | 972.4745  | 486.7409        | 955.4480       | 478.2276         | 954.4639       | 477.7356         | T    | 1197.5858 | 599.2966        | 1180.5593      | 590.7833         | 1179.5753      | 590.2913         | 10 |
| 6  | 1101.5171 | 551.2622        | 1084.4905      | 542.7489         | 1083.5065      | 542.2569         | E    | 1096.5382 | 548.7727        | 1079.5116      | 540.2594         | 1078.5276      | 539.7674         | 9  |
| 7  | 1215.5600 | 608.2836        | 1198.5335      | 599.7704         | 1197.5495      | 599.2784         | N    | 967.4956  | 484.2514        | 950.4690       | 475.7381         | 949.4850       | 475.2461         | 8  |
| 8  | 1329.6029 | 665.3051        | 1312.5764      | 656.7918         | 1311.5924      | 656.2998         | N    | 853.4526  | 427.2300        | 836.4261       | 418.7167         | 835.4421       | 418.2247         | 7  |
| 9  | 1444.6299 | 722.8186        | 1427.6033      | 714.3053         | 1426.6193      | 713.8133         | D    | 739.4097  | 370.2085        | 722.3832       | 361.6952         | 721.3991       | 361.2032         | 6  |
| 10 | 1581.6888 | 791.3480        | 1564.6623      | 782.8348         | 1563.6782      | 782.3428         | H    | 624.3828  | 312.6950        | 607.3562       | 304.1817         |                |                  | 5  |
| 11 | 1694.7729 | 847.8901        | 1677.7463      | 839.3768         | 1676.7623      | 838.8848         | I    | 487.3239  | 244.1656        | 470.2973       | 235.6523         |                |                  | 4  |
| 12 | 1808.8158 | 904.9115        | 1791.7892      | 896.3983         | 1790.8052      | 895.9063         | N    | 374.2398  | 187.6235        | 357.2132       | 179.1103         |                |                  | 3  |
| 13 | 1921.8999 | 961.4536        | 1904.8733      | 952.9403         | 1903.8893      | 952.4483         | L    | 260.1969  | 130.6021        | 243.1703       | 122.0888         |                |                  | 2  |
| 14 |           |                 |                |                  |                |                  | K    | 147.1128  | 74.0600         | 130.0863       | 65.5468          |                |                  | 1  |

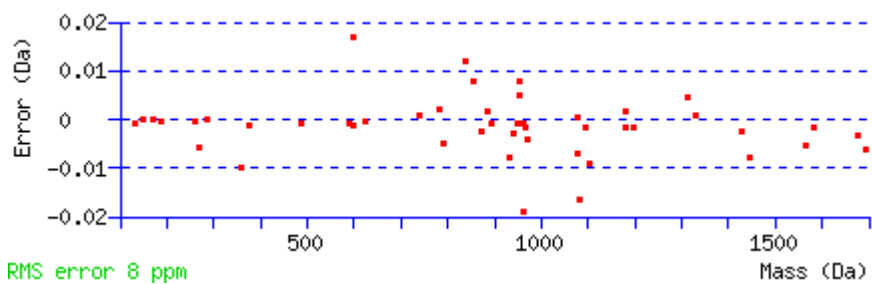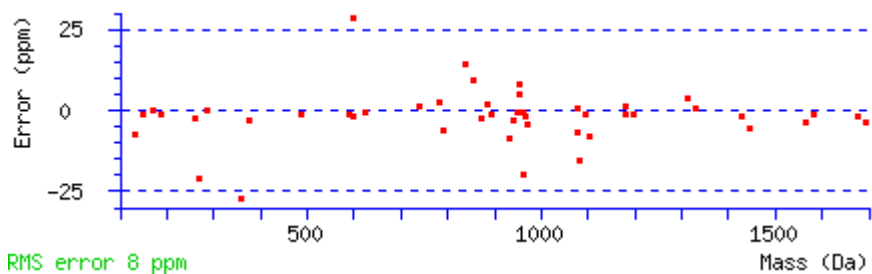

IDENTIFICATION 61

MS/MS Fragmentation of **HHSVEIKIEK**

Found in **Q14151**, Scaffold attachment factor B2 OS=Homo sapiens GN=SAFB2 PE=1 SV=1

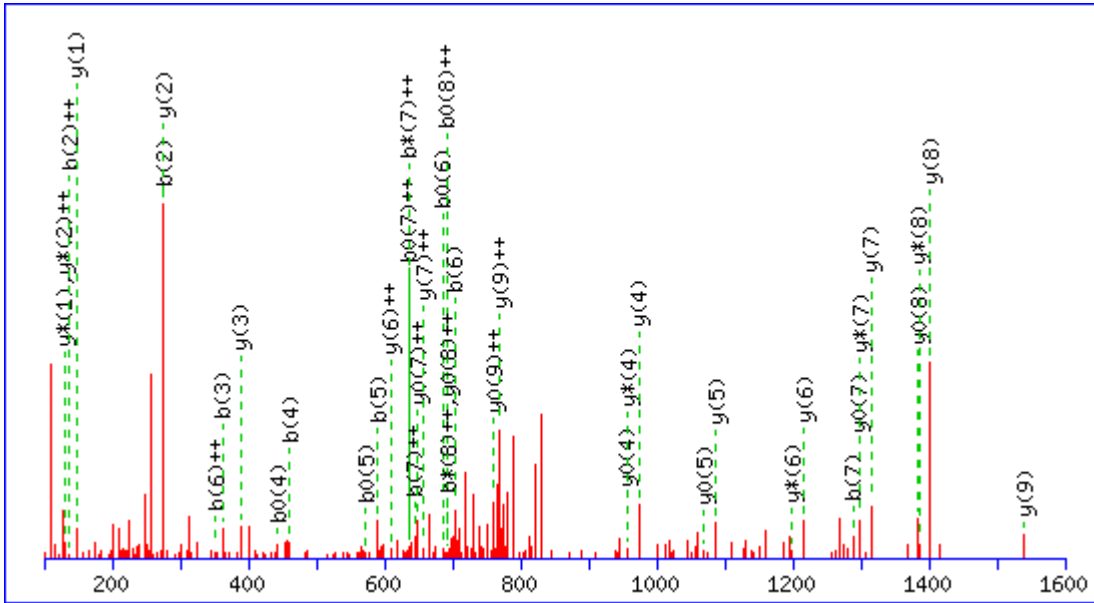

Monoisotopic mass of neutral peptide  $M_r(\text{calc})$ : 1675.8642

Variable modifications:

K7 : Sumo 3 (K)

Ions Score: 37 Expect: 0.17

| #  | b         | b <sup>++</sup> | b <sup>*</sup> | b <sup>+++</sup> | b <sup>0</sup> | b <sup>0++</sup> | Seq. | y         | y <sup>++</sup> | y <sup>*</sup> | y <sup>+++</sup> | y <sup>0</sup> | y <sup>0++</sup> | #  |
|----|-----------|-----------------|----------------|------------------|----------------|------------------|------|-----------|-----------------|----------------|------------------|----------------|------------------|----|
| 1  | 138.0662  | 69.5367         |                |                  |                |                  | H    |           |                 |                |                  |                |                  | 10 |
| 2  | 275.1251  | 138.0662        |                |                  |                |                  | H    | 1539.8125 | 770.4099        | 1522.7860      | 761.8966         | 1521.8020      | 761.4046         | 9  |
| 3  | 362.1571  | 181.5822        |                |                  | 344.1466       | 172.5769         | S    | 1402.7536 | 701.8805        | 1385.7271      | 693.3672         | 1384.7431      | 692.8752         | 8  |
| 4  | 461.2255  | 231.1164        |                |                  | 443.2150       | 222.1111         | V    | 1315.7216 | 658.3644        | 1298.6951      | 649.8512         | 1297.7110      | 649.3592         | 7  |
| 5  | 590.2681  | 295.6377        |                |                  | 572.2576       | 286.6324         | E    | 1216.6532 | 608.8302        | 1199.6266      | 600.3170         | 1198.6426      | 599.8250         | 6  |
| 6  | 703.3522  | 352.1797        |                |                  | 685.3416       | 343.1745         | I    | 1087.6106 | 544.3089        | 1070.5840      | 535.7957         | 1069.6000      | 535.3037         | 5  |
| 7  | 1288.6393 | 644.8233        | 1271.6127      | 636.3100         | 1270.6287      | 635.8180         | K    | 974.5265  | 487.7669        | 957.5000       | 479.2536         | 956.5160       | 478.7616         | 4  |
| 8  | 1401.7233 | 701.3653        | 1384.6968      | 692.8520         | 1383.7128      | 692.3600         | I    | 389.2395  | 195.1234        | 372.2129       | 186.6101         | 371.2289       | 186.1181         | 3  |
| 9  | 1530.7659 | 765.8866        | 1513.7394      | 757.3733         | 1512.7554      | 756.8813         | E    | 276.1554  | 138.5813        | 259.1288       | 130.0681         | 258.1448       | 129.5761         | 2  |
| 10 |           |                 |                |                  |                |                  | K    | 147.1128  | 74.0600         | 130.0863       | 65.5468          |                |                  | 1  |

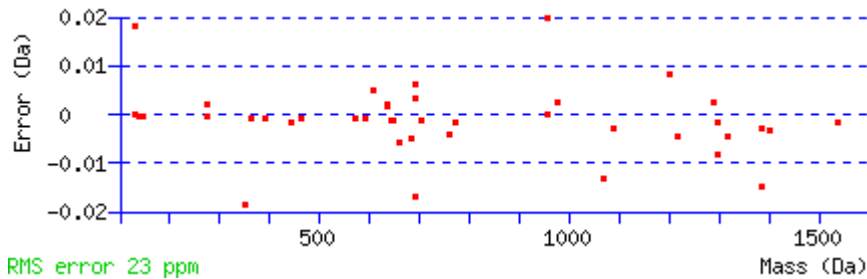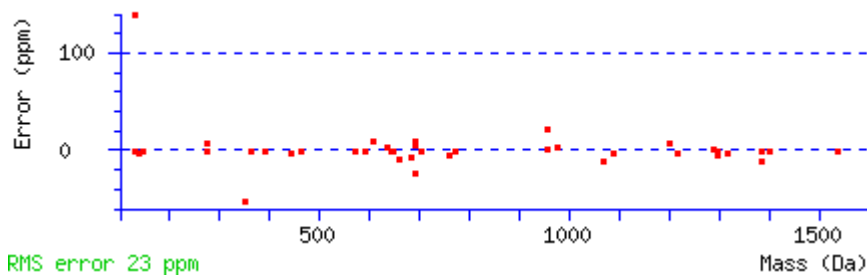

IDENTIFICATION 62

MS/MS Fragmentation of **IIVDELKQEVISTSSK**

Found in **P63244**, Guanine nucleotide-binding protein subunit beta-2-like 1 OS=Homo sapiens GN=GNB2L1 PE=1 SV=3

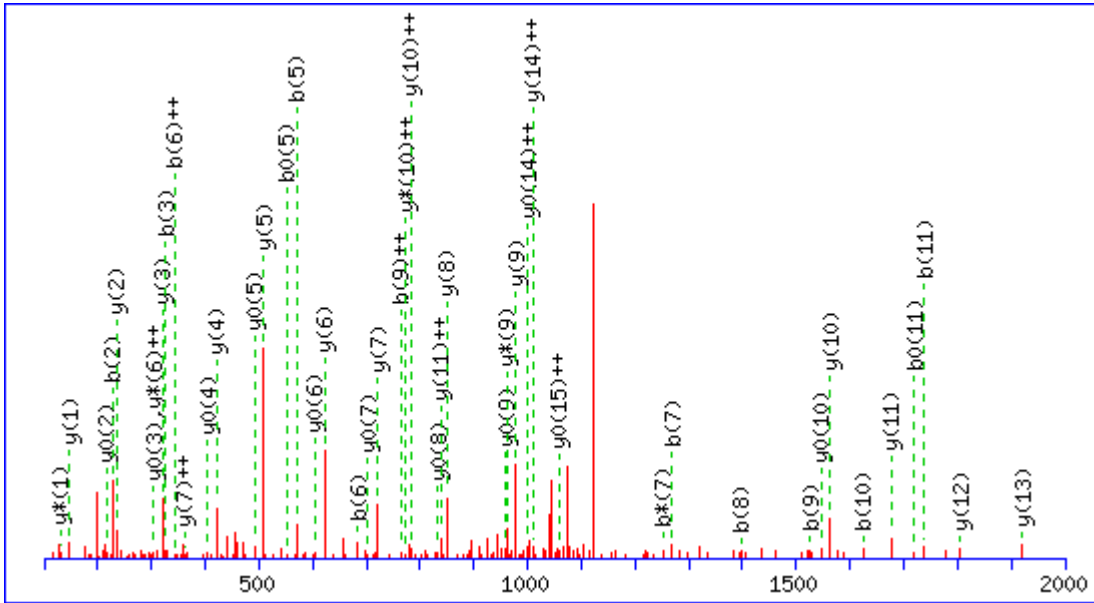

Monoisotopic mass of neutral peptide Mr(calc): 2245.1801

Variable modifications:

K7 : Sumo 3 (K)

Ions Score: 93 Expect: 3.6e-07

| #  | b         | b <sup>++</sup> | b <sup>*</sup> | b <sup>+++</sup> | b <sup>0</sup> | b <sup>0++</sup> | Seq. | y         | y <sup>++</sup> | y <sup>*</sup> | y <sup>+++</sup> | y <sup>0</sup> | y <sup>0++</sup> | #  |
|----|-----------|-----------------|----------------|------------------|----------------|------------------|------|-----------|-----------------|----------------|------------------|----------------|------------------|----|
| 1  | 114.0913  | 57.5493         |                |                  |                |                  | I    |           |                 |                |                  |                |                  | 16 |
| 2  | 227.1754  | 114.0913        |                |                  |                |                  | I    | 2133.1034 | 1067.0553       | 2116.0768      | 1058.5420        | 2115.0928      | 1058.0500        | 15 |
| 3  | 326.2438  | 163.6255        |                |                  |                |                  | V    | 2020.0193 | 1010.5133       | 2002.9928      | 1002.0000        | 2002.0087      | 1001.5080        | 14 |
| 4  | 441.2708  | 221.1390        |                |                  | 423.2602       | 212.1337         | D    | 1920.9509 | 960.9791        | 1903.9243      | 952.4658         | 1902.9403      | 951.9738         | 13 |
| 5  | 570.3134  | 285.6603        |                |                  | 552.3028       | 276.6550         | E    | 1805.9239 | 903.4656        | 1788.8974      | 894.9523         | 1787.9134      | 894.4603         | 12 |
| 6  | 683.3974  | 342.2023        |                |                  | 665.3869       | 333.1971         | L    | 1676.8814 | 838.9443        | 1659.8548      | 830.4310         | 1658.8708      | 829.9390         | 11 |
| 7  | 1268.6845 | 634.8459        | 1251.6579      | 626.3326         | 1250.6739      | 625.8406         | K    | 1563.7973 | 782.4023        | 1546.7707      | 773.8890         | 1545.7867      | 773.3970         | 10 |
| 8  | 1396.7431 | 698.8752        | 1379.7165      | 690.3619         | 1378.7325      | 689.8699         | Q    | 978.5102  | 489.7587        | 961.4837       | 481.2455         | 960.4997       | 480.7535         | 9  |
| 9  | 1525.7857 | 763.3965        | 1508.7591      | 754.8832         | 1507.7751      | 754.3912         | E    | 850.4516  | 425.7295        | 833.4251       | 417.2162         | 832.4411       | 416.7242         | 8  |
| 10 | 1624.8541 | 812.9307        | 1607.8275      | 804.4174         | 1606.8435      | 803.9254         | V    | 721.4090  | 361.2082        | 704.3825       | 352.6949         | 703.3985       | 352.2029         | 7  |
| 11 | 1737.9381 | 869.4727        | 1720.9116      | 860.9594         | 1719.9276      | 860.4674         | I    | 622.3406  | 311.6740        | 605.3141       | 303.1607         | 604.3301       | 302.6687         | 6  |
| 12 | 1824.9702 | 912.9887        | 1807.9436      | 904.4754         | 1806.9596      | 903.9834         | S    | 509.2566  | 255.1319        | 492.2300       | 246.6186         | 491.2460       | 246.1266         | 5  |
| 13 | 1926.0178 | 963.5126        | 1908.9913      | 954.9993         | 1908.0073      | 954.5073         | T    | 422.2245  | 211.6159        | 405.1980       | 203.1026         | 404.2140       | 202.6106         | 4  |
| 14 | 2013.0499 | 1007.0286       | 1996.0233      | 998.5153         | 1995.0393      | 998.0233         | S    | 321.1769  | 161.0921        | 304.1503       | 152.5788         | 303.1663       | 152.0868         | 3  |
| 15 | 2100.0819 | 1050.5446       | 2083.0554      | 1042.0313        | 2082.0713      | 1041.5393        | S    | 234.1448  | 117.5761        | 217.1183       | 109.0628         | 216.1343       | 108.5708         | 2  |
| 16 |           |                 |                |                  |                |                  | K    | 147.1128  | 74.0600         | 130.0863       | 65.5468          |                |                  | 1  |



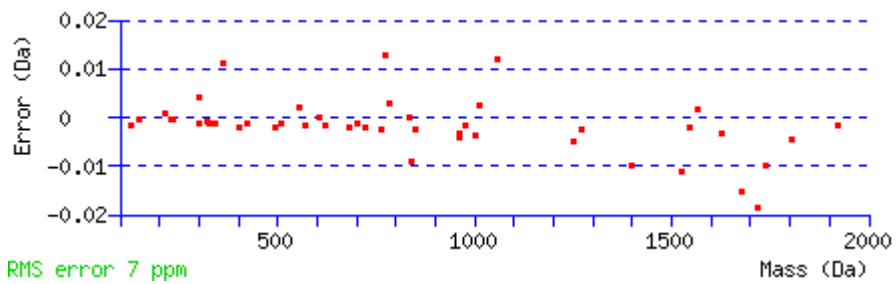

RMS error 7 ppm

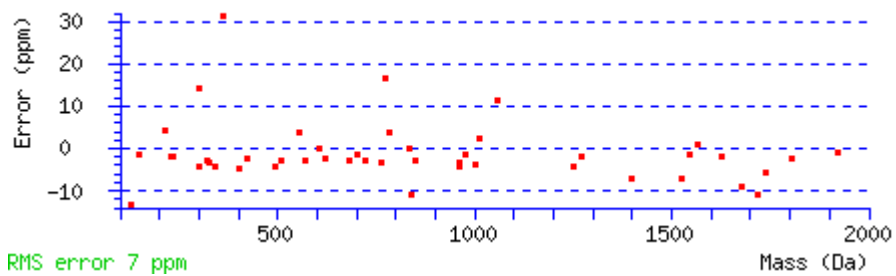

RMS error 7 ppm

IDENTIFICATION 63

MS/MS Fragmentation of

**IKEEAVKEK**

Found in **O76021**, Ribosomal L1 domain-containing protein 1 OS=Homo sapiens GN=RSL1D1 PE=1 SV=3

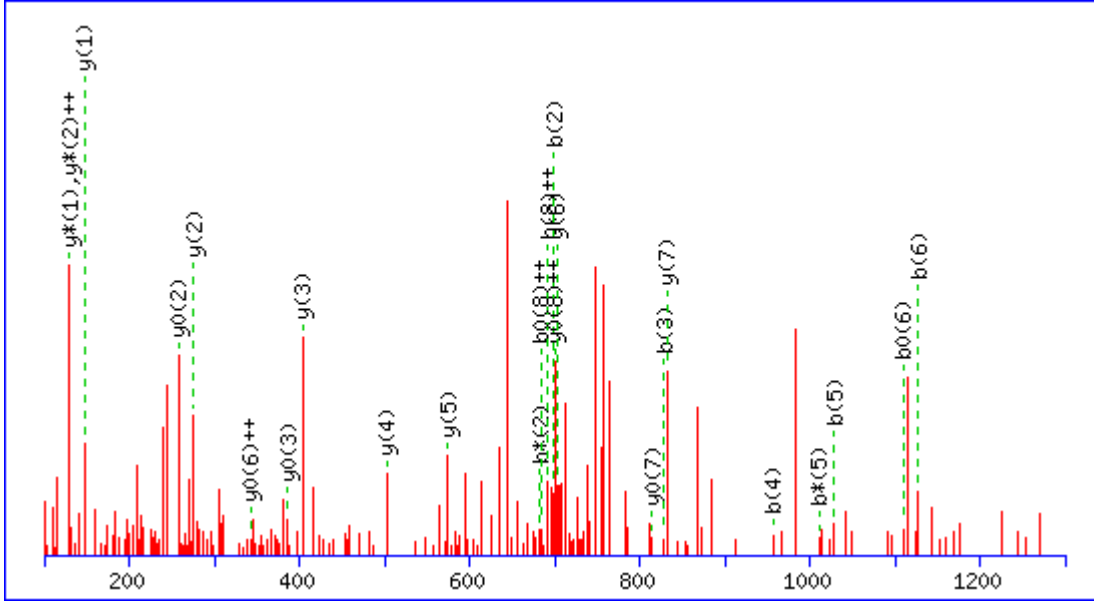

Monoisotopic mass of neutral peptide  $M_r(\text{calc})$ : 1529.8049

Variable modifications:

K2 : Sumo 3 (K)

Ions Score: 19 Expect: 9.9

| # | b         | b <sup>++</sup> | b <sup>+</sup> | b <sup>+++</sup> | b <sup>0</sup> | b <sup>0++</sup> | Seq. | y         | y <sup>++</sup> | y <sup>+</sup> | y <sup>+++</sup> | y <sup>0</sup> | y <sup>0++</sup> | # |
|---|-----------|-----------------|----------------|------------------|----------------|------------------|------|-----------|-----------------|----------------|------------------|----------------|------------------|---|
| 1 | 114.0913  | 57.5493         |                |                  |                |                  | I    |           |                 |                |                  |                |                  | 9 |
| 2 | 699.3784  | 350.1928        | 682.3519       | 341.6796         |                |                  | K    | 1417.7281 | 709.3677        | 1400.7016      | 700.8544         | 1399.7176      | 700.3624         | 8 |
| 3 | 828.4210  | 414.7141        | 811.3945       | 406.2009         | 810.4104       | 405.7089         | E    | 832.4411  | 416.7242        | 815.4145       | 408.2109         | 814.4305       | 407.7189         | 7 |
| 4 | 957.4636  | 479.2354        | 940.4371       | 470.7222         | 939.4530       | 470.2302         | E    | 703.3985  | 352.2029        | 686.3719       | 343.6896         | 685.3879       | 343.1976         | 6 |
| 5 | 1028.5007 | 514.7540        | 1011.4742      | 506.2407         | 1010.4901      | 505.7487         | A    | 574.3559  | 287.6816        | 557.3293       | 279.1683         | 556.3453       | 278.6763         | 5 |
| 6 | 1127.5691 | 564.2882        | 1110.5426      | 555.7749         | 1109.5586      | 555.2829         | V    | 503.3188  | 252.1630        | 486.2922       | 243.6498         | 485.3082       | 243.1577         | 4 |
| 7 | 1255.6641 | 628.3357        | 1238.6375      | 619.8224         | 1237.6535      | 619.3304         | K    | 404.2504  | 202.6288        | 387.2238       | 194.1155         | 386.2398       | 193.6235         | 3 |
| 8 | 1384.7067 | 692.8570        | 1367.6801      | 684.3437         | 1366.6961      | 683.8517         | E    | 276.1554  | 138.5813        | 259.1288       | 130.0681         | 258.1448       | 129.5761         | 2 |
| 9 |           |                 |                |                  |                |                  | K    | 147.1128  | 74.0600         | 130.0863       | 65.5468          |                |                  | 1 |

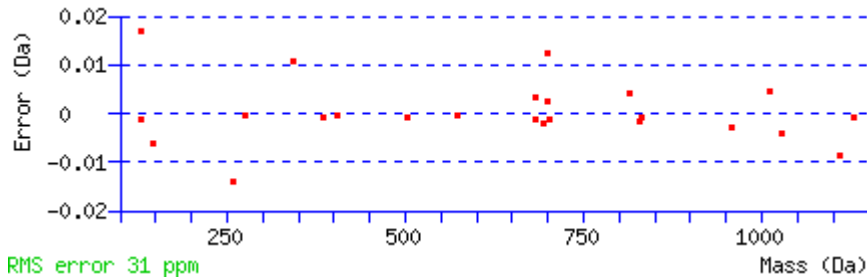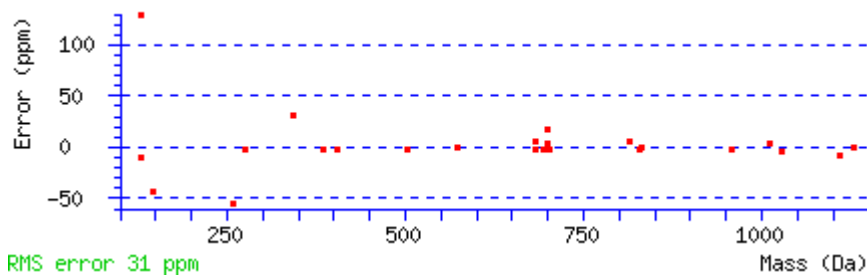

IDENTIFICATION 64

MS/MS Fragmentation of **KIKEDDAPR**

Found in **P25490**, Transcriptional repressor protein YY1 OS=Homo sapiens GN=YY1 PE=1 SV=2

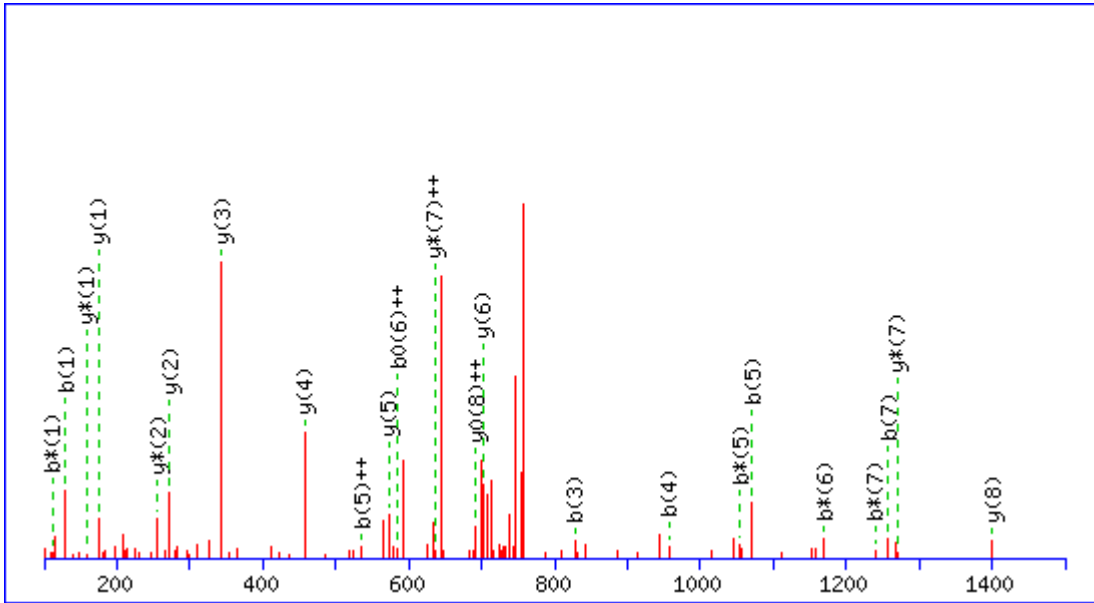

Monoisotopic mass of neutral peptide  $M_r(\text{calc})$ : 1527.7641

Variable modifications:

K3 : Sumo 3 (K)

Ions Score: 36 Expect: 0.3

| # | b         | b <sup>++</sup> | b <sup>*</sup> | b <sup>+++</sup> | b <sup>0</sup> | b <sup>0++</sup> | Seq. | y         | y <sup>++</sup> | y <sup>*</sup> | y <sup>+++</sup> | y <sup>0</sup> | y <sup>0++</sup> | # |
|---|-----------|-----------------|----------------|------------------|----------------|------------------|------|-----------|-----------------|----------------|------------------|----------------|------------------|---|
| 1 | 129.1022  | 65.0548         | 112.0757       | 56.5415          |                |                  | K    |           |                 |                |                  |                |                  | 9 |
| 2 | 242.1863  | 121.5968        | 225.1598       | 113.0835         |                |                  | I    | 1400.6764 | 700.8419        | 1383.6499      | 692.3286         | 1382.6659      | 691.8366         | 8 |
| 3 | 827.4734  | 414.2403        | 810.4468       | 405.7271         |                |                  | K    | 1287.5924 | 644.2998        | 1270.5658      | 635.7866         | 1269.5818      | 635.2945         | 7 |
| 4 | 956.5160  | 478.7616        | 939.4894       | 470.2483         | 938.5054       | 469.7563         | E    | 702.3053  | 351.6563        | 685.2788       | 343.1430         | 684.2947       | 342.6510         | 6 |
| 5 | 1071.5429 | 536.2751        | 1054.5164      | 527.7618         | 1053.5323      | 527.2698         | D    | 573.2627  | 287.1350        | 556.2362       | 278.6217         | 555.2522       | 278.1297         | 5 |
| 6 | 1186.5699 | 593.7886        | 1169.5433      | 585.2753         | 1168.5593      | 584.7833         | D    | 458.2358  | 229.6215        | 441.2092       | 221.1082         | 440.2252       | 220.6162         | 4 |
| 7 | 1257.6070 | 629.3071        | 1240.5804      | 620.7938         | 1239.5964      | 620.3018         | A    | 343.2088  | 172.1081        | 326.1823       | 163.5948         |                |                  | 3 |
| 8 | 1354.6597 | 677.8335        | 1337.6332      | 669.3202         | 1336.6492      | 668.8282         | P    | 272.1717  | 136.5895        | 255.1452       | 128.0762         |                |                  | 2 |
| 9 |           |                 |                |                  |                |                  | R    | 175.1190  | 88.0631         | 158.0924       | 79.5498          |                |                  | 1 |

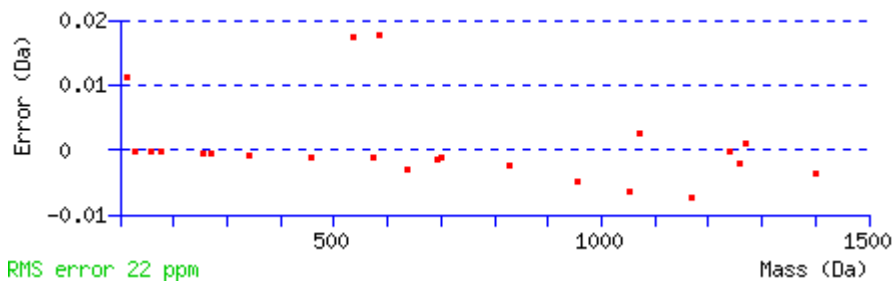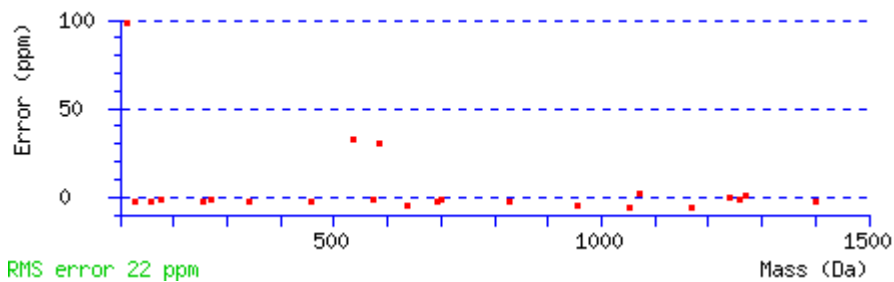

MS/MS Fragmentation of **KQLATKAAR**

Found in **P68431**, Histone H3.1 OS=Homo sapiens GN=HIST1H3A PE=1 SV=2

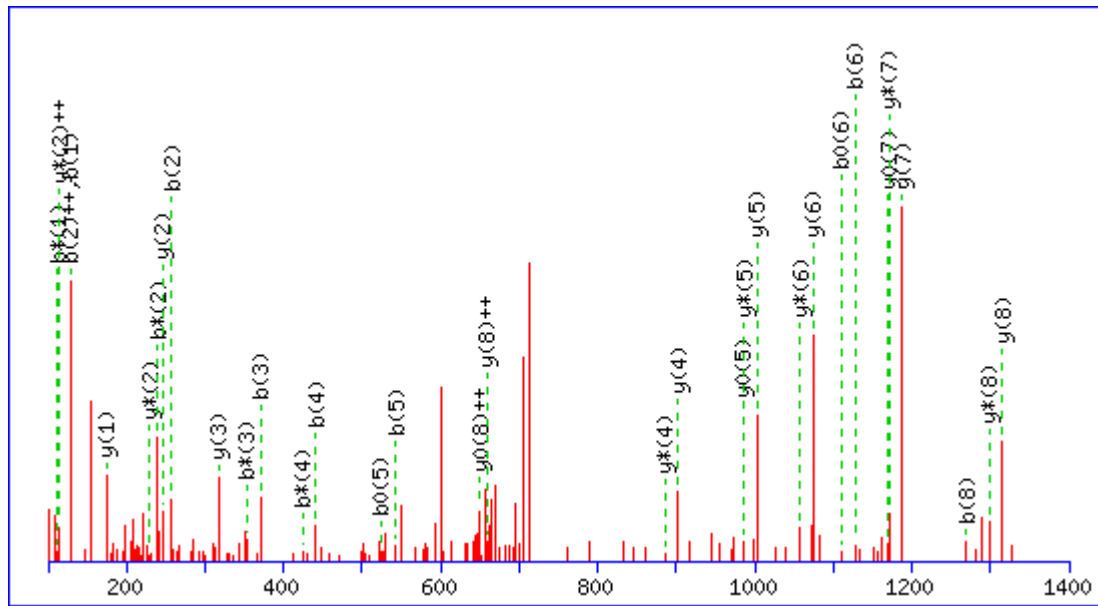

Monoisotopic mass of neutral peptide  $M_r(\text{calc})$ : 1442.7953

Variable modifications:

K6 : Sumo 3 (K)

Ions Score: 41 Expect: 0.022

| # | b         | b <sup>++</sup> | b <sup>*</sup> | b <sup>+++</sup> | b <sup>0</sup> | b <sup>0++</sup> | Seq. | y         | y <sup>++</sup> | y <sup>*</sup> | y <sup>+++</sup> | y <sup>0</sup> | y <sup>0++</sup> | # |
|---|-----------|-----------------|----------------|------------------|----------------|------------------|------|-----------|-----------------|----------------|------------------|----------------|------------------|---|
| 1 | 129.1022  | 65.0548         | 112.0757       | 56.5415          |                |                  | K    |           |                 |                |                  |                |                  | 9 |
| 2 | 257.1608  | 129.0840        | 240.1343       | 120.5708         |                |                  | Q    | 1315.7077 | 658.3575        | 1298.6811      | 649.8442         | 1297.6971      | 649.3522         | 8 |
| 3 | 370.2449  | 185.6261        | 353.2183       | 177.1128         |                |                  | L    | 1187.6491 | 594.3282        | 1170.6226      | 585.8149         | 1169.6385      | 585.3229         | 7 |
| 4 | 441.2820  | 221.1446        | 424.2554       | 212.6314         |                |                  | A    | 1074.5650 | 537.7862        | 1057.5385      | 529.2729         | 1056.5545      | 528.7809         | 6 |
| 5 | 542.3297  | 271.6685        | 525.3031       | 263.1552         | 524.3191       | 262.6632         | T    | 1003.5279 | 502.2676        | 986.5014       | 493.7543         | 985.5174       | 493.2623         | 5 |
| 6 | 1127.6167 | 564.3120        | 1110.5902      | 555.7987         | 1109.6062      | 555.3067         | K    | 902.4803  | 451.7438        | 885.4537       | 443.2305         |                |                  | 4 |
| 7 | 1198.6539 | 599.8306        | 1181.6273      | 591.3173         | 1180.6433      | 590.8253         | A    | 317.1932  | 159.1002        | 300.1666       | 150.5870         |                |                  | 3 |
| 8 | 1269.6910 | 635.3491        | 1252.6644      | 626.8359         | 1251.6804      | 626.3438         | A    | 246.1561  | 123.5817        | 229.1295       | 115.0684         |                |                  | 2 |
| 9 |           |                 |                |                  |                |                  | R    | 175.1190  | 88.0631         | 158.0924       | 79.5498          |                |                  | 1 |

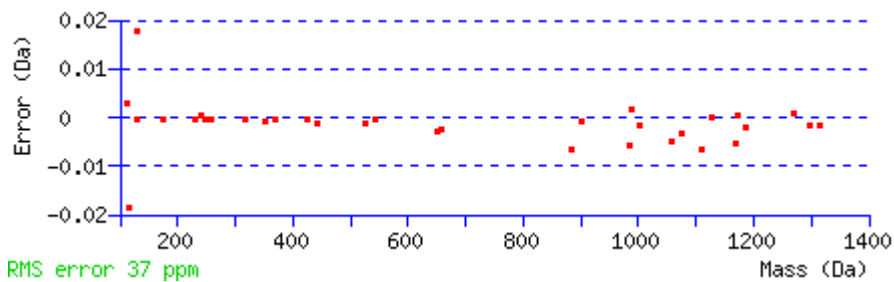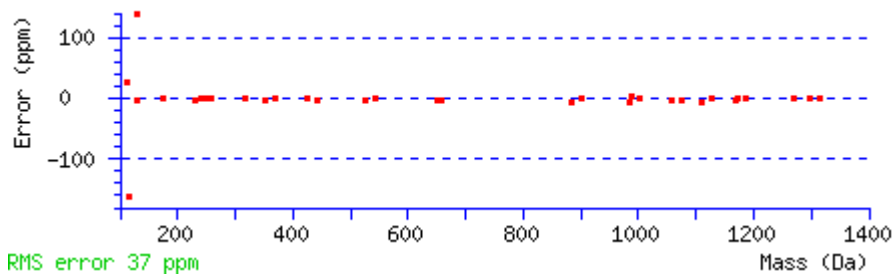

**MS/MS Fragmentation of KRDAEDDGEEDD**

Found in **Q9BTT0**, Acidic leucine-rich nuclear phosphoprotein 32 family member E OS=Homo sapiens GN=ANP32E PE=1 SV=1

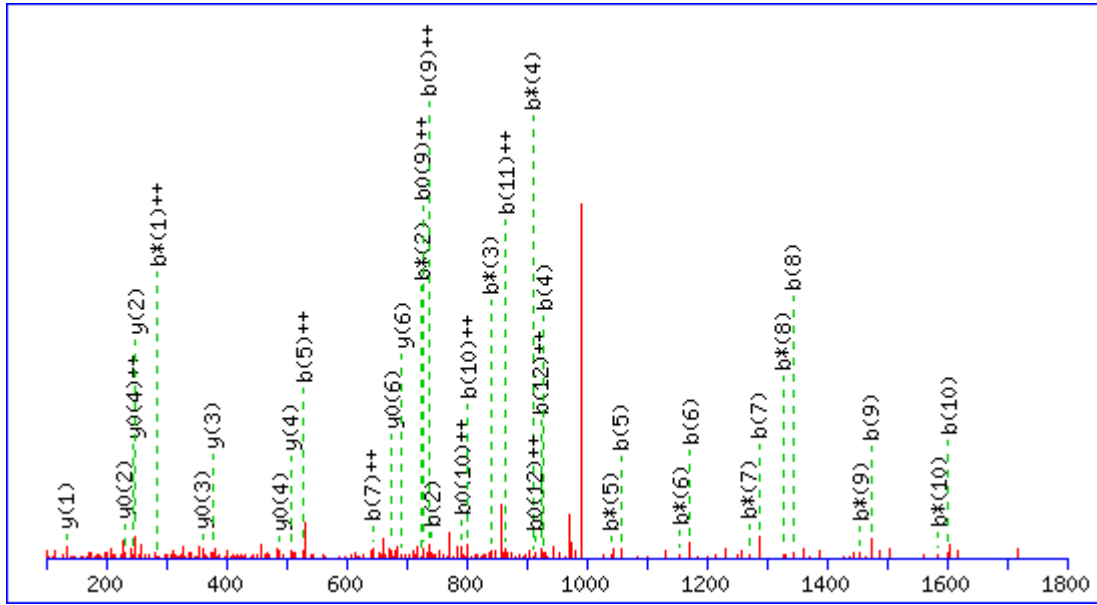

Monoisotopic mass of neutral peptide  $M_r(\text{calc})$ : 1978.7624 Variable modifications: K1 : Sumo 3 (K) Ions Score: 12 Expect: 87

| #  | b         | b <sup>++</sup> | b <sup>*</sup> | b <sup>+++</sup> | b <sup>0</sup> | b <sup>0++</sup> | Seq. | y         | y <sup>++</sup> | y <sup>*</sup> | y <sup>+++</sup> | y <sup>0</sup> | y <sup>0++</sup> | #  |
|----|-----------|-----------------|----------------|------------------|----------------|------------------|------|-----------|-----------------|----------------|------------------|----------------|------------------|----|
| 1  | 586.2944  | 293.6508        | 569.2678       | 285.1375         |                |                  | K    |           |                 |                |                  |                |                  | 13 |
| 2  | 742.3955  | 371.7014        | 725.3689       | 363.1881         |                |                  | R    | 1394.4826 | 697.7449        | 1377.4561      | 689.2317         | 1376.4721      | 688.7397         | 12 |
| 3  | 857.4224  | 429.2148        | 840.3959       | 420.7016         | 839.4118       | 420.2096         | D    | 1238.3815 | 619.6944        |                |                  | 1220.3709      | 610.6891         | 11 |
| 4  | 928.4595  | 464.7334        | 911.4330       | 456.2201         | 910.4490       | 455.7281         | A    | 1123.3546 | 562.1809        |                |                  | 1105.3440      | 553.1756         | 10 |
| 5  | 1057.5021 | 529.2547        | 1040.4756      | 520.7414         | 1039.4915      | 520.2494         | E    | 1052.3174 | 526.6624        |                |                  | 1034.3069      | 517.6571         | 9  |
| 6  | 1172.5291 | 586.7682        | 1155.5025      | 578.2549         | 1154.5185      | 577.7629         | D    | 923.2749  | 462.1411        |                |                  | 905.2643       | 453.1358         | 8  |
| 7  | 1287.5560 | 644.2816        | 1270.5294      | 635.7684         | 1269.5454      | 635.2764         | D    | 808.2479  | 404.6276        |                |                  | 790.2373       | 395.6223         | 7  |
| 8  | 1344.5775 | 672.7924        | 1327.5509      | 664.2791         | 1326.5669      | 663.7871         | G    | 693.2210  | 347.1141        |                |                  | 675.2104       | 338.1088         | 6  |
| 9  | 1473.6201 | 737.3137        | 1456.5935      | 728.8004         | 1455.6095      | 728.3084         | E    | 636.1995  | 318.6034        |                |                  | 618.1889       | 309.5981         | 5  |
| 10 | 1602.6626 | 801.8350        | 1585.6361      | 793.3217         | 1584.6521      | 792.8297         | E    | 507.1569  | 254.0821        |                |                  | 489.1463       | 245.0768         | 4  |
| 11 | 1731.7052 | 866.3563        | 1714.6787      | 857.8430         | 1713.6947      | 857.3510         | E    | 378.1143  | 189.5608        |                |                  | 360.1038       | 180.5555         | 3  |
| 12 | 1846.7322 | 923.8697        | 1829.7056      | 915.3565         | 1828.7216      | 914.8644         | D    | 249.0717  | 125.0395        |                |                  | 231.0612       | 116.0342         | 2  |
| 13 |           |                 |                |                  |                |                  | D    | 134.0448  | 67.5260         |                |                  | 116.0342       | 58.5207          | 1  |

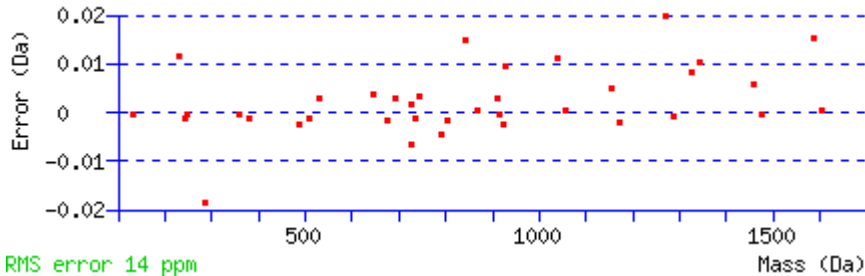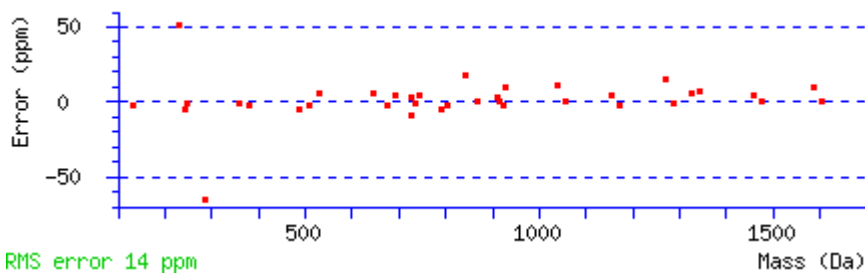

IDENTIFICATION 51

MS/MS Fragmentation of **VKEDPDGEHARR**

Found in

**P52272**

, Heterogeneous nuclear ribonucleoprotein M OS=Homo sapiens GN=HNRNPM PE=1 SV=3

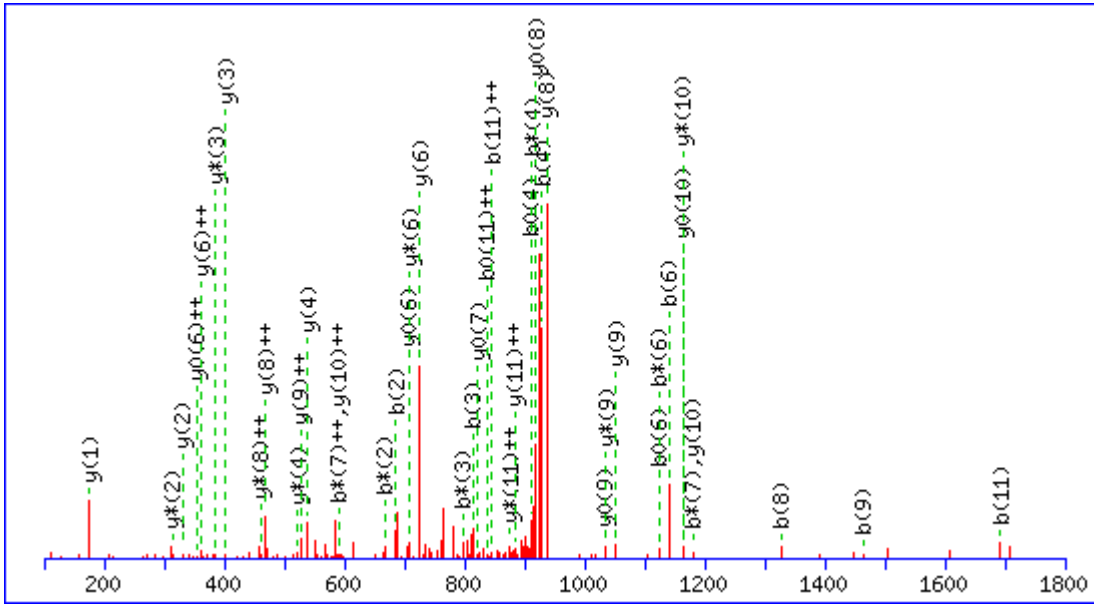

Monoisotopic mass of neutral peptide  $M_r(\text{calc})$ : 1864.8776

Variable modifications:

K2 : Sumo 3 (K)

Ions Score: 36 Expect: 0.5

| #  | b         | b <sup>++</sup> | b <sup>+</sup> | b <sup>+++</sup> | b <sup>0</sup> | b <sup>0++</sup> | Seq. | y         | y <sup>++</sup> | y <sup>+</sup> | y <sup>+++</sup> | y <sup>0</sup> | y <sup>0++</sup> | #  |
|----|-----------|-----------------|----------------|------------------|----------------|------------------|------|-----------|-----------------|----------------|------------------|----------------|------------------|----|
| 1  | 100.0757  | 50.5415         |                |                  |                |                  | V    |           |                 |                |                  |                |                  | 12 |
| 2  | 685.3628  | 343.1850        | 668.3362       | 334.6717         |                |                  | K    | 1766.8165 | 883.9119        | 1749.7899      | 875.3986         | 1748.8059      | 874.9066         | 11 |
| 3  | 814.4054  | 407.7063        | 797.3788       | 399.1930         | 796.3948       | 398.7010         | E    | 1181.5294 | 591.2683        | 1164.5028      | 582.7551         | 1163.5188      | 582.2631         | 10 |
| 4  | 929.4323  | 465.2198        | 912.4058       | 456.7065         | 911.4217       | 456.2145         | D    | 1052.4868 | 526.7470        | 1035.4602      | 518.2338         | 1034.4762      | 517.7418         | 9  |
| 5  | 1026.4851 | 513.7462        | 1009.4585      | 505.2329         | 1008.4745      | 504.7409         | P    | 937.4599  | 469.2336        | 920.4333       | 460.7203         | 919.4493       | 460.2283         | 8  |
| 6  | 1141.5120 | 571.2596        | 1124.4855      | 562.7464         | 1123.5014      | 562.2544         | D    | 840.4071  | 420.7072        | 823.3805       | 412.1939         | 822.3965       | 411.7019         | 7  |
| 7  | 1198.5335 | 599.7704        | 1181.5069      | 591.2571         | 1180.5229      | 590.7651         | G    | 725.3801  | 363.1937        | 708.3536       | 354.6804         | 707.3696       | 354.1884         | 6  |
| 8  | 1327.5761 | 664.2917        | 1310.5495      | 655.7784         | 1309.5655      | 655.2864         | E    | 668.3587  | 334.6830        | 651.3321       | 326.1697         | 650.3481       | 325.6777         | 5  |
| 9  | 1464.6350 | 732.8211        | 1447.6084      | 724.3079         | 1446.6244      | 723.8158         | H    | 539.3161  | 270.1617        | 522.2895       | 261.6484         |                |                  | 4  |
| 10 | 1535.6721 | 768.3397        | 1518.6455      | 759.8264         | 1517.6615      | 759.3344         | A    | 402.2572  | 201.6322        | 385.2306       | 193.1190         |                |                  | 3  |
| 11 | 1691.7732 | 846.3902        | 1674.7467      | 837.8770         | 1673.7626      | 837.3850         | R    | 331.2201  | 166.1137        | 314.1935       | 157.6004         |                |                  | 2  |
| 12 |           |                 |                |                  |                |                  | R    | 175.1190  | 88.0631         | 158.0924       | 79.5498          |                |                  | 1  |

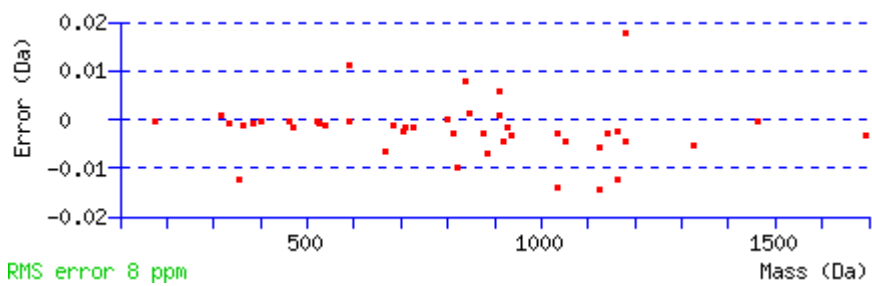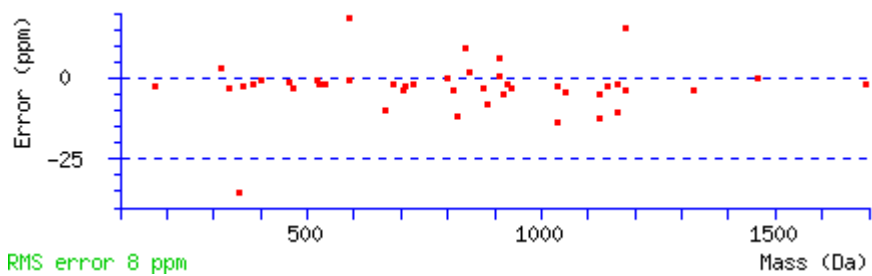

IDENTIFICATION 67

MS/MS Fragmentation of **MSEKPKEGVKTENDHNLK**

Found in **P55854**, Small ubiquitin-related modifier 3 OS=Homo sapiens GN=SUMO3 PE=1 SV=2

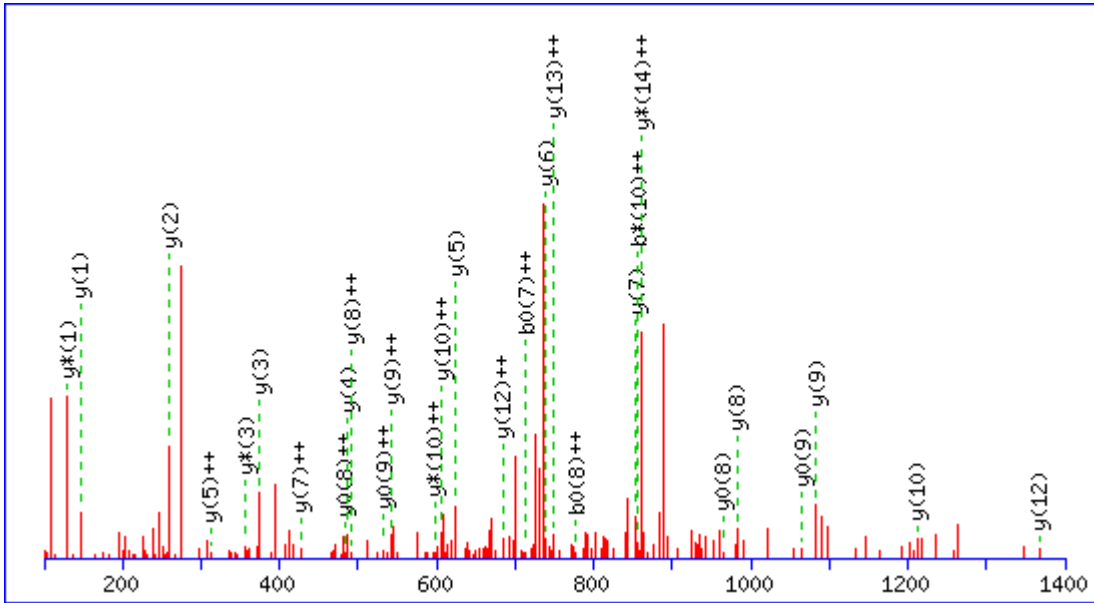

Monoisotopic mass of neutral peptide Mr(calc): 2938.4090

Variable modifications:

N-term : Acetyl (N-term)

K5 : Sumo 3 (K)

K7 : GlyGly (K)

Ions Score: 12 Expect: 2.7e+02

| #  | b         | b <sup>++</sup> | b <sup>*</sup> | b <sup>+++</sup> | b <sup>0</sup> | b <sup>0++</sup> | Seq. | y         | y <sup>++</sup> | y <sup>*</sup> | y <sup>+++</sup> | y <sup>0</sup> | y <sup>0++</sup> | #  |
|----|-----------|-----------------|----------------|------------------|----------------|------------------|------|-----------|-----------------|----------------|------------------|----------------|------------------|----|
| 1  | 174.0583  | 87.5328         |                |                  |                |                  | M    |           |                 |                |                  |                |                  | 20 |
| 2  | 261.0904  | 131.0488        |                |                  | 243.0798       | 122.0435         | S    | 2766.3653 | 1383.6863       | 2749.3387      | 1375.1730        | 2748.3547      | 1374.6810        | 19 |
| 3  | 390.1329  | 195.5701        |                |                  | 372.1224       | 186.5648         | E    | 2679.3333 | 1340.1703       | 2662.3067      | 1331.6570        | 2661.3227      | 1331.1650        | 18 |
| 4  | 519.1755  | 260.0914        |                |                  | 501.1650       | 251.0861         | E    | 2550.2907 | 1275.6490       | 2533.2641      | 1267.1357        | 2532.2801      | 1266.6437        | 17 |
| 5  | 1104.4626 | 552.7349        | 1087.4361      | 544.2217         | 1086.4520      | 543.7297         | K    | 2421.2481 | 1211.1277       | 2404.2215      | 1202.6144        | 2403.2375      | 1202.1224        | 16 |
| 6  | 1201.5154 | 601.2613        | 1184.4888      | 592.7481         | 1183.5048      | 592.2560         | P    | 1835.9610 | 918.4841        | 1818.9345      | 909.9709         | 1817.9504      | 909.4789         | 15 |
| 7  | 1443.6533 | 722.3303        | 1426.6267      | 713.8170         | 1425.6427      | 713.3250         | K    | 1738.9082 | 869.9578        | 1721.8817      | 861.4445         | 1720.8977      | 860.9525         | 14 |
| 8  | 1572.6959 | 786.8516        | 1555.6693      | 778.3383         | 1554.6853      | 777.8463         | E    | 1496.7703 | 748.8888        | 1479.7438      | 740.3755         | 1478.7598      | 739.8835         | 13 |
| 9  | 1629.7173 | 815.3623        | 1612.6908      | 806.8490         | 1611.7068      | 806.3570         | G    | 1367.7278 | 684.3675        | 1350.7012      | 675.8542         | 1349.7172      | 675.3622         | 12 |
| 10 | 1728.7857 | 864.8965        | 1711.7592      | 856.3832         | 1710.7752      | 855.8912         | V    | 1310.7063 | 655.8568        | 1293.6797      | 647.3435         | 1292.6957      | 646.8515         | 11 |
| 11 | 1856.8807 | 928.9440        | 1839.8542      | 920.4307         | 1838.8701      | 919.9387         | K    | 1211.6379 | 606.3226        | 1194.6113      | 597.8093         | 1193.6273      | 597.3173         | 10 |
| 12 | 1957.9284 | 979.4678        | 1940.9018      | 970.9546         | 1939.9178      | 970.4625         | T    | 1083.5429 | 542.2751        | 1066.5164      | 533.7618         | 1065.5323      | 533.2698         | 9  |
| 13 | 2086.9710 | 1043.9891       | 2069.9444      | 1035.4759        | 2068.9604      | 1034.9838        | E    | 982.4952  | 491.7513        | 965.4687       | 483.2380         | 964.4847       | 482.7460         | 8  |
| 14 | 2201.0139 | 1101.0106       | 2183.9874      | 1092.4973        | 2183.0033      | 1092.0053        | N    | 853.4526  | 427.2300        | 836.4261       | 418.7167         | 835.4421       | 418.2247         | 7  |
| 15 | 2316.0408 | 1158.5241       | 2299.0143      | 1150.0108        | 2298.0303      | 1149.5188        | D    | 739.4097  | 370.2085        | 722.3832       | 361.6952         | 721.3991       | 361.2032         | 6  |
| 16 | 2453.0998 | 1227.0535       | 2436.0732      | 1218.5402        | 2435.0892      | 1218.0482        | H    | 624.3828  | 312.6950        | 607.3562       | 304.1817         |                |                  | 5  |
| 17 | 2566.1838 | 1283.5955       | 2549.1573      | 1275.0823        | 2548.1733      | 1274.5903        | I    | 487.3239  | 244.1656        | 470.2973       | 235.6523         |                |                  | 4  |
| 18 | 2680.2267 | 1340.6170       | 2663.2002      | 1332.1037        | 2662.2162      | 1331.6117        | N    | 374.2398  | 187.6235        | 357.2132       | 179.1103         |                |                  | 3  |
| 19 | 2793.3108 | 1397.1590       | 2776.2843      | 1388.6458        | 2775.3002      | 1388.1538        | L    | 260.1969  | 130.6021        | 243.1703       | 122.0888         |                |                  | 2  |
| 20 |           |                 |                |                  |                |                  | K    | 147.1128  | 74.0600         | 130.0863       | 65.5468          |                |                  | 1  |



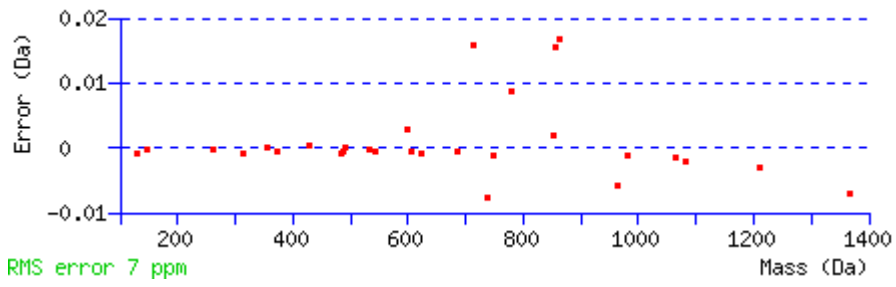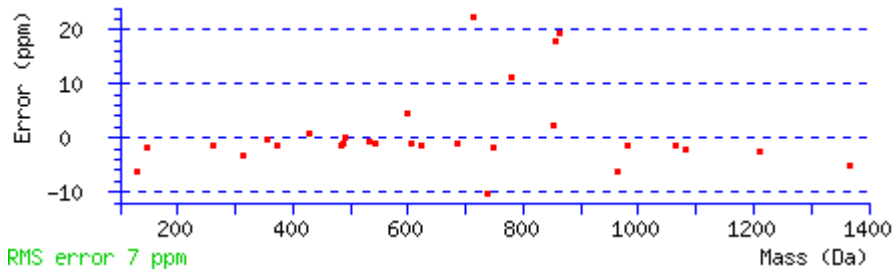

IDENTIFICATION 68

MS/MS Fragmentation of **NLPFDFTWKMLK**

Found in **P52272**, Heterogeneous nuclear ribonucleoprotein M OS=Homo sapiens GN=HNRNPM PE=1 SV=3

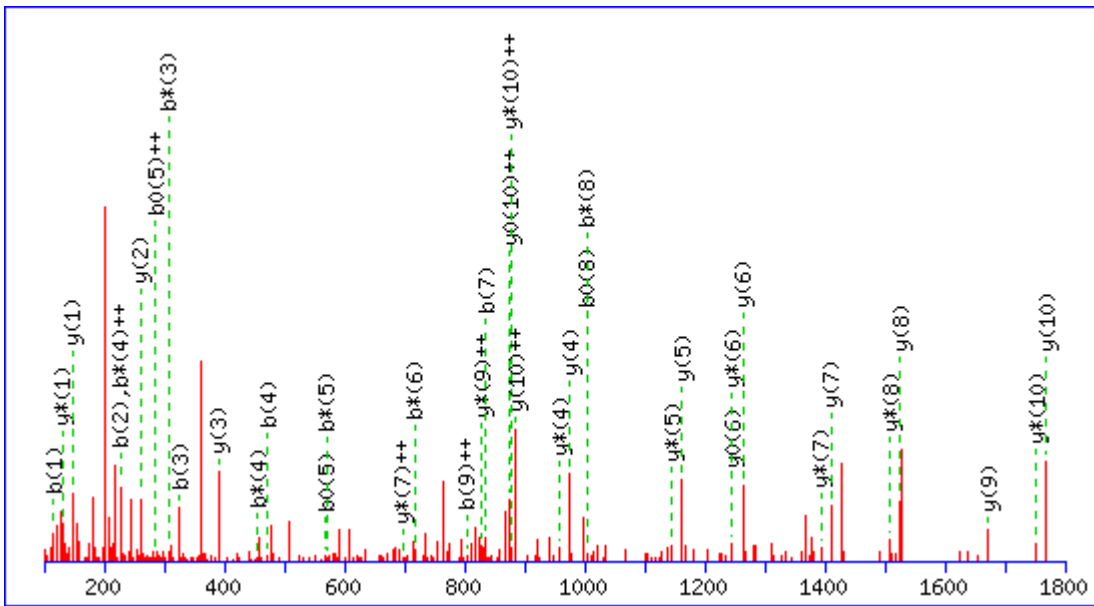

Monoisotopic mass of neutral peptide  $M_r(\text{calc})$ : 1995.9877 Variable modifications: K9 : Sumo 3 (K) Ions Score: 42 Expect: 0.096

| #  | b         | b <sup>++</sup> | b <sup>*</sup> | b <sup>+++</sup> | b <sup>0</sup> | b <sup>0++</sup> | Seq. | y         | y <sup>++</sup> | y <sup>*</sup> | y <sup>+++</sup> | y <sup>0</sup> | y <sup>0++</sup> | #  |
|----|-----------|-----------------|----------------|------------------|----------------|------------------|------|-----------|-----------------|----------------|------------------|----------------|------------------|----|
| 1  | 115.0502  | 58.0287         | 98.0237        | 49.5155          |                |                  | N    |           |                 |                |                  |                |                  | 12 |
| 2  | 228.1343  | 114.5708        | 211.1077       | 106.0575         |                |                  | L    | 1882.9520 | 941.9796        | 1865.9255      | 933.4664         | 1864.9415      | 932.9744         | 11 |
| 3  | 325.1870  | 163.0972        | 308.1605       | 154.5839         |                |                  | P    | 1769.8680 | 885.4376        | 1752.8414      | 876.9243         | 1751.8574      | 876.4323         | 10 |
| 4  | 472.2554  | 236.6314        | 455.2289       | 228.1181         |                |                  | F    | 1672.8152 | 836.9112        | 1655.7886      | 828.3980         | 1654.8046      | 827.9060         | 9  |
| 5  | 587.2824  | 294.1448        | 570.2558       | 285.6316         | 569.2718       | 285.1395         | D    | 1525.7468 | 763.3770        | 1508.7202      | 754.8638         | 1507.7362      | 754.3717         | 8  |
| 6  | 734.3508  | 367.6790        | 717.3243       | 359.1658         | 716.3402       | 358.6738         | F    | 1410.7198 | 705.8636        | 1393.6933      | 697.3503         | 1392.7093      | 696.8583         | 7  |
| 7  | 835.3985  | 418.2029        | 818.3719       | 409.6896         | 817.3879       | 409.1976         | T    | 1263.6514 | 632.3293        | 1246.6249      | 623.8161         | 1245.6409      | 623.3241         | 6  |
| 8  | 1021.4778 | 511.2425        | 1004.4512      | 502.7293         | 1003.4672      | 502.2373         | W    | 1162.6037 | 581.8055        | 1145.5772      | 573.2922         |                |                  | 5  |
| 9  | 1606.7649 | 803.8861        | 1589.7383      | 795.3728         | 1588.7543      | 794.8808         | K    | 976.5244  | 488.7659        | 959.4979       | 480.2526         |                |                  | 4  |
| 10 | 1737.8054 | 869.4063        | 1720.7788      | 860.8930         | 1719.7948      | 860.4010         | M    | 391.2374  | 196.1223        | 374.2108       | 187.6090         |                |                  | 3  |
| 11 | 1850.8894 | 925.9483        | 1833.8629      | 917.4351         | 1832.8789      | 916.9431         | L    | 260.1969  | 130.6021        | 243.1703       | 122.0888         |                |                  | 2  |
| 12 |           |                 |                |                  |                |                  | K    | 147.1128  | 74.0600         | 130.0863       | 65.5468          |                |                  | 1  |

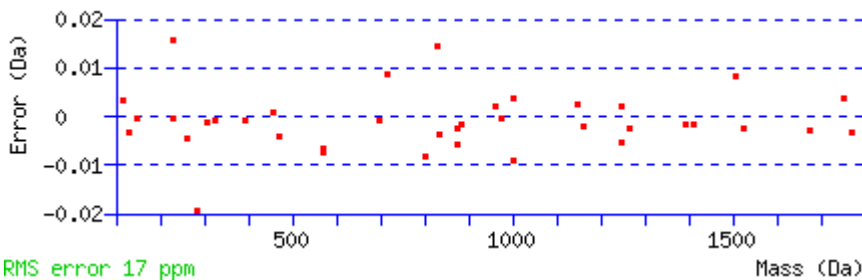

RMS error 17 ppm

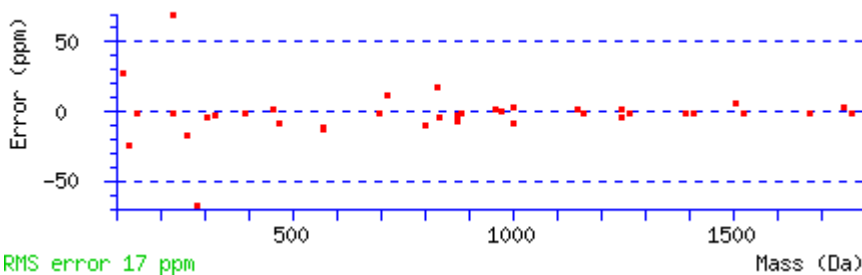

RMS error 17 ppm

IDENTIFICATION 69

MS/MS Fragmentation of **SDQEAKPSTEDLGDKK**

Found in **P63165**, Small ubiquitin-related modifier 1 OS=Homo sapiens GN=SUMO1 PE=1 SV=1

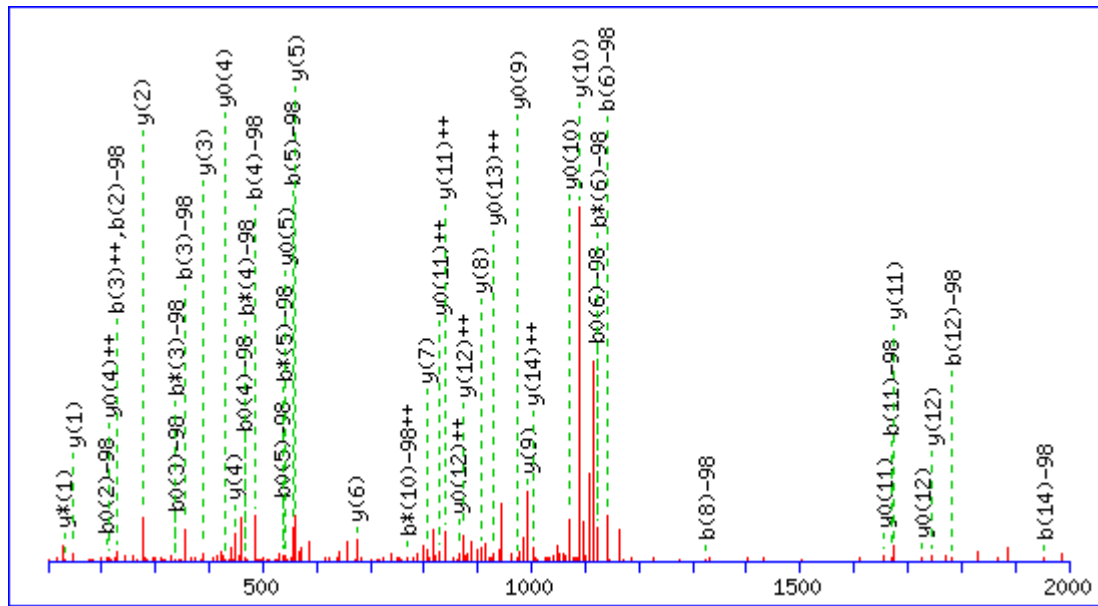

Monoisotopic mass of neutral peptide  $M_r(\text{calc})$ : 2325.9962

Variable modifications:

N-term : Acetyl (N-term)

S1 : Phospho (ST), with neutral losses 97.9769 (shown in table), 0.0000

K6 : Sumo 3 (K)

Ions Score: 45 Expect: 0.11

| #  | b         | b <sup>++</sup> | b <sup>*</sup> | b <sup>+++</sup> | b <sup>0</sup> | b <sup>0++</sup> | Seq. | y         | y <sup>++</sup> | y <sup>*</sup> | y <sup>+++</sup> | y <sup>0</sup> | y <sup>0++</sup> | #  |
|----|-----------|-----------------|----------------|------------------|----------------|------------------|------|-----------|-----------------|----------------|------------------|----------------|------------------|----|
| 1  | 112.0393  | 56.5233         |                |                  | 94.0287        | 47.5180          | S    |           |                 |                |                  |                |                  | 16 |
| 2  | 227.0662  | 114.0368        |                |                  | 209.0557       | 105.0315         | D    | 2117.9945 | 1059.5009       | 2100.9680      | 1050.9876        | 2099.9840      | 1050.4956        | 15 |
| 3  | 355.1248  | 178.0661        | 338.0983       | 169.5528         | 337.1143       | 169.0608         | Q    | 2002.9676 | 1001.9874       | 1985.9411      | 993.4742         | 1984.9570      | 992.9822         | 14 |
| 4  | 484.1674  | 242.5873        | 467.1409       | 234.0741         | 466.1569       | 233.5821         | E    | 1874.9090 | 937.9582        | 1857.8825      | 929.4449         | 1856.8985      | 928.9529         | 13 |
| 5  | 555.2045  | 278.1059        | 538.1780       | 269.5926         | 537.1940       | 269.1006         | A    | 1745.8664 | 873.4369        | 1728.8399      | 864.9236         | 1727.8559      | 864.4316         | 12 |
| 6  | 1140.4916 | 570.7494        | 1123.4651      | 562.2362         | 1122.4810      | 561.7442         | K    | 1674.8293 | 837.9183        | 1657.8028      | 829.4050         | 1656.8188      | 828.9130         | 11 |
| 7  | 1237.5444 | 619.2758        | 1220.5178      | 610.7625         | 1219.5338      | 610.2705         | P    | 1089.5422 | 545.2748        | 1072.5157      | 536.7615         | 1071.5317      | 536.2695         | 10 |
| 8  | 1324.5764 | 662.7918        | 1307.5498      | 654.2786         | 1306.5658      | 653.7866         | S    | 992.4895  | 496.7484        | 975.4629       | 488.2351         | 974.4789       | 487.7431         | 9  |
| 9  | 1425.6241 | 713.3157        | 1408.5975      | 704.8024         | 1407.6135      | 704.3104         | T    | 905.4575  | 453.2324        | 888.4309       | 444.7191         | 887.4469       | 444.2271         | 8  |
| 10 | 1554.6667 | 777.8370        | 1537.6401      | 769.3237         | 1536.6561      | 768.8317         | E    | 804.4098  | 402.7085        | 787.3832       | 394.1953         | 786.3992       | 393.7032         | 7  |
| 11 | 1669.6936 | 835.3504        | 1652.6671      | 826.8372         | 1651.6830      | 826.3452         | D    | 675.3672  | 338.1872        | 658.3406       | 329.6740         | 657.3566       | 329.1819         | 6  |
| 12 | 1782.7777 | 891.8925        | 1765.7511      | 883.3792         | 1764.7671      | 882.8872         | L    | 560.3402  | 280.6738        | 543.3137       | 272.1605         | 542.3297       | 271.6685         | 5  |
| 13 | 1839.7991 | 920.4032        | 1822.7726      | 911.8899         | 1821.7886      | 911.3979         | G    | 447.2562  | 224.1317        | 430.2296       | 215.6185         | 429.2456       | 215.1264         | 4  |
| 14 | 1954.8261 | 977.9167        | 1937.7995      | 969.4034         | 1936.8155      | 968.9114         | D    | 390.2347  | 195.6210        | 373.2082       | 187.1077         | 372.2241       | 186.6157         | 3  |
| 15 | 2082.9210 | 1041.9642       | 2065.8945      | 1033.4509        | 2064.9105      | 1032.9589        | K    | 275.2078  | 138.1075        | 258.1812       | 129.5942         |                |                  | 2  |
| 16 |           |                 |                |                  |                |                  | K    | 147.1128  | 74.0600         | 130.0863       | 65.5468          |                |                  | 1  |

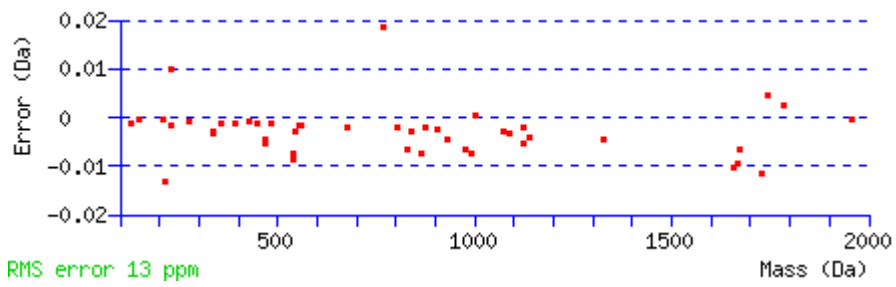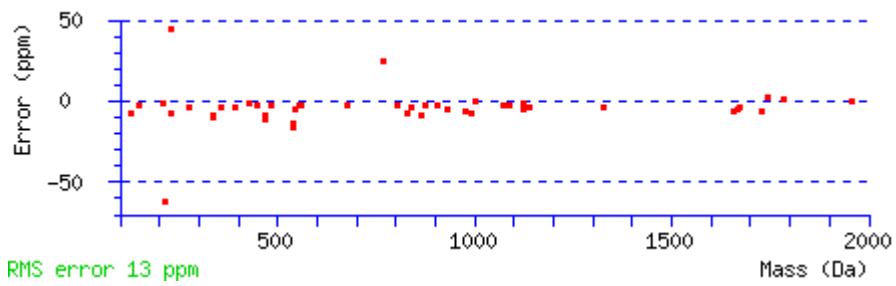

IDENTIFICATION 70

MS/MS Fragmentation of  
SEEKPKEGVK

Found in

P55854

, Small ubiquitin-related modifier 3 OS=Homo sapiens GN=SUMO3 PE=1 SV=2

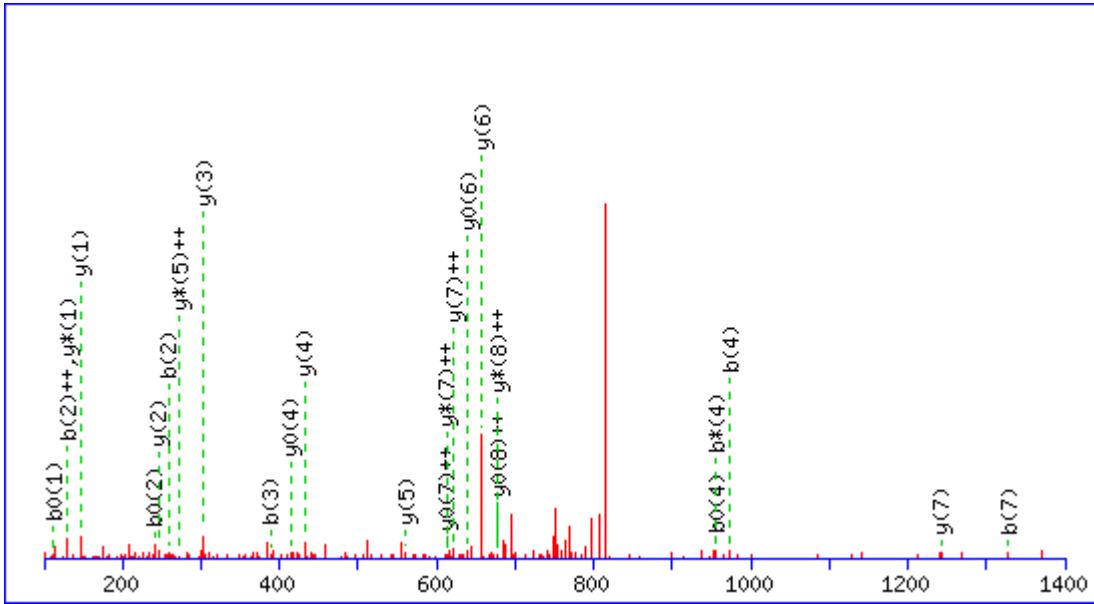

Monoisotopic mass of neutral peptide  $M_r(\text{calc})$ : 1628.8005

Variable modifications:

N-term : Acetyl (N-term)

K4 : Sumo 3 (K)

Ions Score: 28 Expect: 2.2

| #  | b         | b <sup>++</sup> | b <sup>*</sup> | b <sup>+++</sup> | b <sup>0</sup> | b <sup>0++</sup> | Seq. | y         | y <sup>++</sup> | y <sup>*</sup> | y <sup>+++</sup> | y <sup>0</sup> | y <sup>0++</sup> | #  |
|----|-----------|-----------------|----------------|------------------|----------------|------------------|------|-----------|-----------------|----------------|------------------|----------------|------------------|----|
| 1  | 130.0499  | 65.5286         |                |                  | 112.0393       | 56.5233          | S    |           |                 |                |                  |                |                  | 10 |
| 2  | 259.0925  | 130.0499        |                |                  | 241.0819       | 121.0446         | E    | 1500.7653 | 750.8863        | 1483.7387      | 742.3730         | 1482.7547      | 741.8810         | 9  |
| 3  | 388.1351  | 194.5712        |                |                  | 370.1245       | 185.5659         | E    | 1371.7227 | 686.3650        | 1354.6961      | 677.8517         | 1353.7121      | 677.3597         | 8  |
| 4  | 973.4221  | 487.2147        | 956.3956       | 478.7014         | 955.4116       | 478.2094         | K    | 1242.6801 | 621.8437        | 1225.6535      | 613.3304         | 1224.6695      | 612.8384         | 7  |
| 5  | 1070.4749 | 535.7411        | 1053.4483      | 527.2278         | 1052.4643      | 526.7358         | P    | 657.3930  | 329.2001        | 640.3665       | 320.6869         | 639.3824       | 320.1949         | 6  |
| 6  | 1198.5699 | 599.7886        | 1181.5433      | 591.2753         | 1180.5593      | 590.7833         | K    | 560.3402  | 280.6738        | 543.3137       | 272.1605         | 542.3297       | 271.6685         | 5  |
| 7  | 1327.6124 | 664.3099        | 1310.5859      | 655.7966         | 1309.6019      | 655.3046         | E    | 432.2453  | 216.6263        | 415.2187       | 208.1130         | 414.2347       | 207.6210         | 4  |
| 8  | 1384.6339 | 692.8206        | 1367.6074      | 684.3073         | 1366.6233      | 683.8153         | G    | 303.2027  | 152.1050        | 286.1761       | 143.5917         |                |                  | 3  |
| 9  | 1483.7023 | 742.3548        | 1466.6758      | 733.8415         | 1465.6918      | 733.3495         | V    | 246.1812  | 123.5942        | 229.1547       | 115.0810         |                |                  | 2  |
| 10 |           |                 |                |                  |                |                  | K    | 147.1128  | 74.0600         | 130.0863       | 65.5468          |                |                  | 1  |

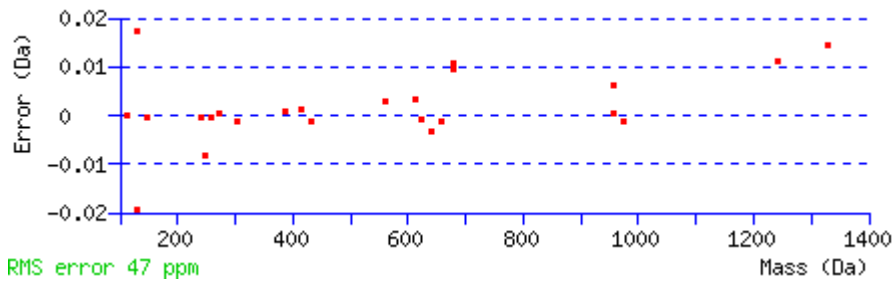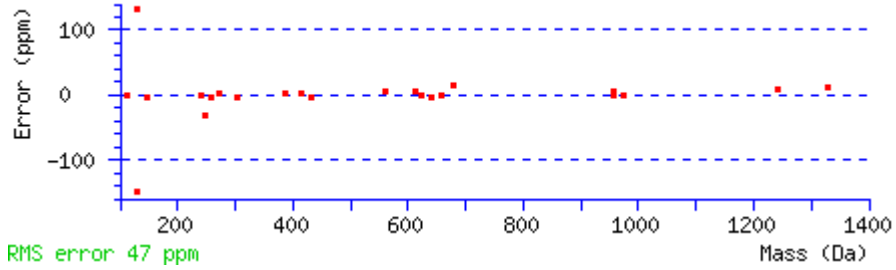

MS/MS Fragmentation of **TEWETAAPAVAETPDIKLFGK**

Found in

**P46782**

, 40S ribosomal protein S5 OS=Homo sapiens GN=RPS5 PE=1 SV=4

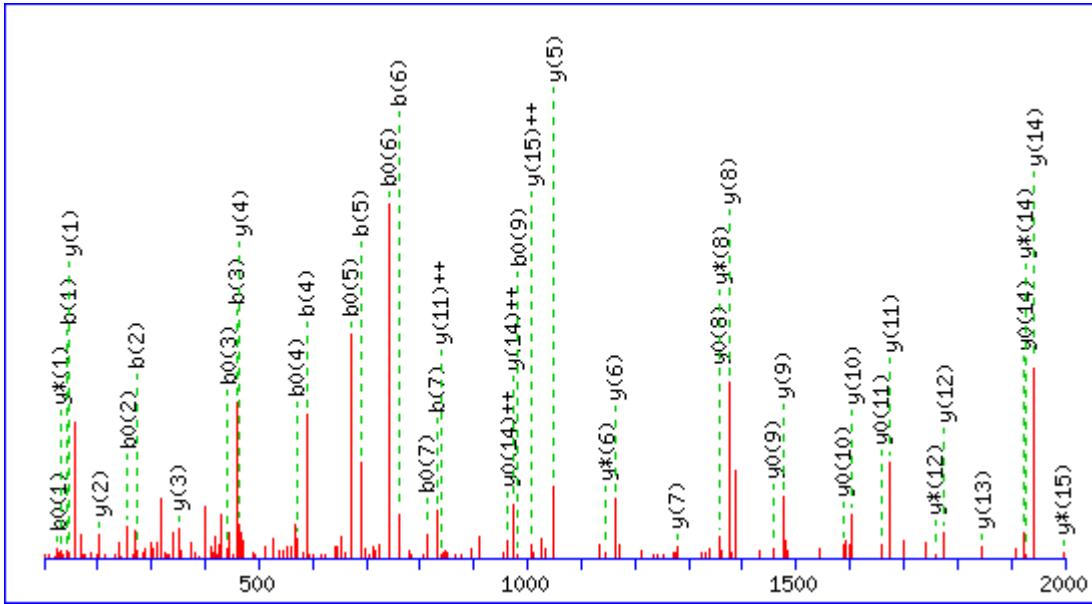Monoisotopic mass of neutral peptide  $M_r(\text{calc})$ : 2772.3606

Variable modifications:

N-term : Acetyl (N-term)

K17 : Sumo 3 (K)

Ions Score: 76 Expect: 7e-05

| #  | b         | b <sup>++</sup> | b <sup>*</sup> | b <sup>+++</sup> | b <sup>0</sup> | b <sup>0++</sup> | Seq. | y         | y <sup>++</sup> | y <sup>*</sup> | y <sup>+++</sup> | y <sup>0</sup> | y <sup>0++</sup> | #  |
|----|-----------|-----------------|----------------|------------------|----------------|------------------|------|-----------|-----------------|----------------|------------------|----------------|------------------|----|
| 1  | 144.0655  | 72.5364         |                |                  | 126.0550       | 63.5311          | T    |           |                 |                |                  |                |                  | 21 |
| 2  | 273.1081  | 137.0577        |                |                  | 255.0975       | 128.0524         | E    | 2630.3097 | 1315.6585       | 2613.2831      | 1307.1452        | 2612.2991      | 1306.6532        | 20 |
| 3  | 459.1874  | 230.0974        |                |                  | 441.1769       | 221.0921         | W    | 2501.2671 | 1251.1372       | 2484.2405      | 1242.6239        | 2483.2565      | 1242.1319        | 19 |
| 4  | 588.2300  | 294.6186        |                |                  | 570.2195       | 285.6134         | E    | 2315.1878 | 1158.0975       | 2298.1612      | 1149.5842        | 2297.1772      | 1149.0922        | 18 |
| 5  | 689.2777  | 345.1425        |                |                  | 671.2671       | 336.1372         | T    | 2186.1452 | 1093.5762       | 2169.1186      | 1085.0630        | 2168.1346      | 1084.5709        | 17 |
| 6  | 760.3148  | 380.6610        |                |                  | 742.3042       | 371.6558         | A    | 2085.0975 | 1043.0524       | 2068.0709      | 1034.5391        | 2067.0869      | 1034.0471        | 16 |
| 7  | 831.3519  | 416.1796        |                |                  | 813.3414       | 407.1743         | A    | 2014.0604 | 1007.5338       | 1997.0338      | 999.0206         | 1996.0498      | 998.5285         | 15 |
| 8  | 928.4047  | 464.7060        |                |                  | 910.3941       | 455.7007         | P    | 1943.0233 | 972.0153        | 1925.9967      | 963.5020         | 1925.0127      | 963.0100         | 14 |
| 9  | 999.4418  | 500.2245        |                |                  | 981.4312       | 491.2193         | A    | 1845.9705 | 923.4889        | 1828.9440      | 914.9756         | 1827.9599      | 914.4836         | 13 |
| 10 | 1098.5102 | 549.7587        |                |                  | 1080.4997      | 540.7535         | V    | 1774.9334 | 887.9703        | 1757.9068      | 879.4571         | 1756.9228      | 878.9651         | 12 |
| 11 | 1169.5473 | 585.2773        |                |                  | 1151.5368      | 576.2720         | A    | 1675.8650 | 838.4361        | 1658.8384      | 829.9229         | 1657.8544      | 829.4308         | 11 |
| 12 | 1298.5899 | 649.7986        |                |                  | 1280.5794      | 640.7933         | E    | 1604.8279 | 802.9176        | 1587.8013      | 794.4043         | 1586.8173      | 793.9123         | 10 |
| 13 | 1399.6376 | 700.3224        |                |                  | 1381.6270      | 691.3172         | T    | 1475.7853 | 738.3963        | 1458.7587      | 729.8830         | 1457.7747      | 729.3910         | 9  |
| 14 | 1496.6904 | 748.8488        |                |                  | 1478.6798      | 739.8435         | P    | 1374.7376 | 687.8724        | 1357.7110      | 679.3592         | 1356.7270      | 678.8672         | 8  |
| 15 | 1611.7173 | 806.3623        |                |                  | 1593.7067      | 797.3570         | D    | 1277.6848 | 639.3461        | 1260.6583      | 630.8328         | 1259.6743      | 630.3408         | 7  |
| 16 | 1724.8014 | 862.9043        |                |                  | 1706.7908      | 853.8990         | I    | 1162.6579 | 581.8326        | 1145.6313      | 573.3193         |                |                  | 6  |
| 17 | 2310.0884 | 1155.5479       | 2293.0619      | 1147.0346        | 2292.0779      | 1146.5426        | K    | 1049.5738 | 525.2905        | 1032.5473      | 516.7773         |                |                  | 5  |
| 18 | 2423.1725 | 1212.0899       | 2406.1460      | 1203.5766        | 2405.1619      | 1203.0846        | L    | 464.2867  | 232.6470        | 447.2602       | 224.1337         |                |                  | 4  |
| 19 | 2570.2409 | 1285.6241       | 2553.2144      | 1277.1108        | 2552.2304      | 1276.6188        | F    | 351.2027  | 176.1050        | 334.1761       | 167.5917         |                |                  | 3  |
| 20 | 2627.2624 | 1314.1348       | 2610.2358      | 1305.6216        | 2609.2518      | 1305.1296        | G    | 204.1343  | 102.5708        | 187.1077       | 94.0575          |                |                  | 2  |
| 21 |           |                 |                |                  |                |                  | K    | 147.1128  | 74.0600         | 130.0863       | 65.5468          |                |                  | 1  |

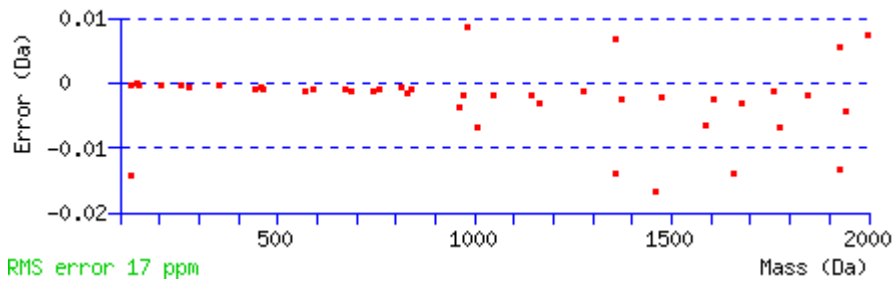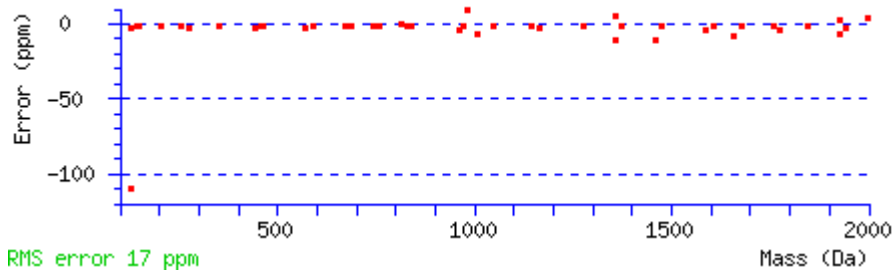

Supplement: supp_M112.025569_mcp.M112.025569-2.pdf [file supp_M112.025569_mcp.M112.025569-2.pdf]
